# Supplementary material for: The Transcriptional landscape of Streptococcus pneumoniae TIGR4 reveals a complex operon architecture and abundant riboregulation critical for growth and virulence
Source: PLoS Pathog. 2018 Dec 5;14(12):e1007461. doi: 10.1371/journal.ppat.1007461 (PMC6296669; doi:10.1371/journal.ppat.1007461)
Supplement: S2 Table — The positions of all 1864 enriched sense TTSs, and the coverage of each site pooled from all the samples are listed. Lengths of the 3’-UTRs are also listed for the sense TTSs. The predicted stem-loop structure and the number of uridines upstream of each TTS is also shown. (XLSX) [file ppat.1007461.s006.xlsx]

## Sheet: TTS.10.1
Locus	From	To	Strand	TTS	Coverage	Enrichment_over_background	3'UTR_length	40nt_upstream	20nt_downstream	Fold	MFE	No._of_Us
SP_0001	197	1558	+	1603	58	3.51515	45	UGGAUAACUUUUAGUUUUUUAUCUUUUUUAUCCACAUUUU	UUAAACAAGCUAAAAAACUU	(((((((.....((........))...)))))))......	-5	4
SP_0002	1717	2853	+	2888	7221	185.869	35	AAUUAAGUGAAAGAGGUUGAGCCUGGCUCGCCUCUUUUAU	GAUAUAAUCGAAAAAGAAAA	......(((((((((((.((((...)))))))))))))))	-17.8	6
SP_0004	3196	4311	+	4364	8298	164.985	53	GGUGUCAAUUAGGUUGGAAAAAAAUUCCAACCCUUUUGGC	UUUUGAAAGGAAAAAUAAAU	...(((((...((((((((.....))))))))...)))))	-14.6	4
SP_0007	8519	8785	+	8802	41	2.61375	17	ACACGGGUAGAAGAAAAUGUCUAAAAAUAUUGUACAAUUG	AAUAAUUCUUUUAUUCAAAA	.......((((........)))).................	-0.9	3
SP_0008	8778	9146	+	9187	85	4.72222	41	UAAAAUGGAAAAUUUAUUAGACGUAAUAGAGCAAUUUUUG	AGUUUGUCAGAUGAAAAGCU	............(((((((....)))))))..........	-2.3	5
SP_0010	9266	10534	+	10638	32	2.06452	104	UUCUAGCUCUUUCUGGUGGAUUAGAUUCCAUGUUUCUAUU	UAAGGUAUUGUCUACUUAUC	...............(((((......))))).........	-5.3	6
SP_0011	10531	11808	+	11813	324	9.17907	5	AACACUGUACUUUAUAUAGAAAAAAUAGAUAGGUAAAAAA	UGUUAGAAAACGAUAUUAAA	.((.((((.((...............))))))))......	-1.4	1
SP_0012	11812	12354	+	12421	342	6.47709	67	AAAUAAUGGUUUAAUUAAAAAUCCUUUUCUAUGGUUAUUA	UUUAUCUUUUUCCUUGUGAC	.((((((.((..((............))..)).)))))).	-2	4
SP_0013	12370	14328	+	14358	53252	174.689	30	ACGAAAAAUAACCCUGAGAGAGGCUGGAGCCUCUCUUUUU	UGUGCAGUUUAGGAGCUAAA	...............(((((((((....)))))))))...	-14.5	6
SP_0014	14450	14929	+	15066	34	2.46377	137	CCGUUGGUCAAGGGGUUAAGACACCGCCUUUUCACGGCGG	UAACACGGGUUCGAAUCCCG	(((((((..(((((((......))).))))..).))))))	-14.5	0
SP_2242	15023	15094	+	15237	2051	62.1515	143	AGUUGUCGCUUGAGAGAAGCAAGUGACAAAGACCUUUGAA	AACUGAACAAGACGAACCAA	..((((((((((.......))))))))))...........	-12.2	3
SP_rrnaA16S	15349	16900	+	16931	833	30.1812	31	UUUCUAAGGAUAAGGAACUGCGCAUUGGUCUUGUUUAGUC	UUGAGAGGUCUUGUGGGGCC	.......((((((((..(........).))))))))....	-3.9	4
SP_2243	16945	17017	+	17019	74	4.64824	2	GCACGCAGGAGGUCAGCGGUUCGAUCCCGCUAGGCUCCAU	UGGUGAGAGAUCACCAAGUA	.......((((.(.(((((.......))))).).))))..	-15	2
SP_rrnaA23S	17141	20044	+	20099	5914	40.163	55	GAAAGCGAACGGUUUUCUUAAAUUGAAUAGAUAUUCAAUU	UUGAGUAGGUAUUACUCAGA	((((((.....))))))...((((((((....))))))))	-9.1	4
5_8S_rRNA	17154	17307	+	17418	2334	30.0995	111	AGUAGCGGCGAGCGAAACGGCAGAAGGGCAAACCGAAGAG	UUUACUCUUCGGGGUUGUAG	.....(((...((..............))...))).....	-3.9	0
SP_rrnaA5S	20120	20235	+	20235	288	5.34985	0	AGUUGGGGGUUGCCCCCUGUGAGAUAGGGAAGUCGCUUAG	CUUUAAUCCGCCAUAGCUCA	....(((((...))))).((((..........))))....	-11.1	3
SP_2244	20241	20314	+	20346	265	7.16216	32	CUGGCGGAGUAAUUGAGUUAAGAGGUUUAGACCUCUUUUU	UGUUAUGUAAUAAUAAUCUA	...................(((((((....)))))))...	-7.6	6
SP_RS11515	20422	21267	+	21364	1065	48.4091	97	AGCGAAGAUCUAGAAAGGACAAAUUUCGUCCUUUCUUUUU	UGAAGUUUUCAAAGUUCCUA	...........(((((((((.......)))))))))....	-11.8	7
SP_0017	21302	22105	-	21198	13	13	104	CUCGUAAAAGGUAUUGCAACUUGGUAAUACCUUUUUGAGG	UGCUUUUUGAUAUGAGCCCA	((((.((((((((((((......)))))))))))))))).	-17.8	4
SP_0018	22359	22601	+	22724	38	3.32039	123	UUUUAAUAGUUGGAAAUAGCAAAUCUUUCUAUUGUUUCUU	CUUGAUAAAAAGGCGAUUUU	...((((((..(((.........)))..))))))......	-3.8	6
SP_0019	22832	24118	+	24262	26359	737.259	144	AAUAAUCUCCCUAUAGAGUCACCGCAUUCGGUGGCUUUUU	UUGUGUUGGGAUUCAUGAUA	..............((((((((((....))))))))))..	-12.9	5
csRNA	24165	24262	+	24262	26359	302.542	0	AAUAAUCUCCCUAUAGAGUCACCGCAUUCGGUGGCUUUUU	UUGUGUUGGGAUUCAUGAUA	..............((((((((((....))))))))))..	-12.9	5
SP_0020	24319	24786	+	24906	743	47.9355	120	AUCCAGCAGCCCUAAGCGAUUUGAAUUGUGUGCUCUUUUU	UUCGUGCUUUUUCCGAAUAA	....((.(((.....(((((....)))))..)))))....	-3.6	6
Bacteria_small_SRP	24819	24916	+	25062	11	11	146	UAUUGCCCAAGCGUGAGACAGCGCAUGCGGCUGGUUACGA	CUUAAAGGUUGCUGUGCGUA	....(((((.((((......)))).)).))).........	-12.1	2
SP_0022	25355	25933	+	25976	37	2.42857	43	AGAGGUUUGUCAUCGCAAAGAAAAAAGCGACAUUUGUAUG	UCAAAAUUGUGGGUAUAAUU	............((((..........))))..........	-3.3	5
SP_RS00155	25947	27308	+	27384	46	3.32766	76	AGAAAUAUUUGACUAUCAAAUUUUCAAGGAGGGAAUCGUG	UCGUAUUUUGAACAGUUUAU	.((((.((((((...))))))))))...............	-4.3	2
SP_0024	27312	27878	+	27899	38	2.10138	21	UGACAGUCGUAGAAUUAUAAAUACUUCAUUUAGAAAGAAA	GUGUAUGAAGAAAAGCAAUA	........................................	0	0
SP_0025	27903	28112	+	28188	82	4.25974	76	UGGUUGUCUAGUUUUGCUAAUACUUAUAUCCAUGAUUUAC	UGGGGGUUCUUUUCCCAGAU	(((.(((..(((.........))).))).)))........	-2.9	4
SP_0026	28094	28717	+	28769	3276	119.797	52	AAAGAAUGAUGCAAGGGUACAAAUAUGGUGCCCUUCUUUU	AUUUUUGAUUGAAAAAUAGU	............((((((((.......)))))))).....	-10.8	6
SP_0027	28862	29830	+	29863	7815	222.438	33	AAAUUUAAUGACCAAGCCUGAGAUGAUUCUCAGGUUUUUU	CGUCUUUUUUCCGAAUAAAU	.............((((((((((....))))))))))...	-14.1	6
SP_0029	30372	30710	-	30361	1528	19.1199	11	CAGUAUCUGAAUUUGAGGCACUGUUGUAAAAUGGCUCCAU	AAUAUCCAUAGUGGGUAAAU	((((.(((.......))).)))).................	-4.2	2
SP_0030	30598	30841	-	30468	136	4.14514	130	GCGUGGGAAAGUUGAAGGAAGGGCAGAAAGGAAACUUUUU	GCCUUCCUAGACAUAGUACG	.....((((((((...................))))))))	-3	5
SP_0031	30929	31279	-	30840	32	2.56	89	AUUAUUUCUCAGAUGACCUGGCUUUUCAUAGCUUUAGUAU	GCGCGAAGACACAACAGGUG	.........(((.....)))(((......)))........	-3.5	5
SP_0032	31535	34168	+	34194	2137	52.417	26	UACGAGGCUAAAUAAAAAGGGGGCUAGUCCUCCUUUUUUG	UAGUAUAAUUCUGCAAACCU	.............((((((((((.....))))))))))..	-10.7	6
SP_0033	34253	34690	+	34721	3252	47.941	31	GGAAGCAUAAGAAAAAGGUAGCUGAUGGGCUACCUUUUGU	GUUAUACUCAAUGAAAAUCA	............(((((((((((....)))))))))))..	-15.3	5
SP_0034	35009	36019	-	34990	1383	37.8856	19	ACCCUUAUCGGCAUUUUCUAAUACUCUUCGAAAAUCUCUU	CAAACCACGUCAACGUCGCC	.........((.((((((...........)))))).))..	-2	4
SP_0035	36168	37337	+	37433	62	3.31605	96	UGACAAGCUCGUCAAAAUUUUUACAGAGCAGGUUGGCAAA	CGCAUGUUUUUUGUCAAACA	.(((..((((...............))))..)))......	-6.9	2
SP_0036	37334	38104	+	38139	76	5.1567	35	AAAUGAAAAAAAUCGCAGUAGAUGCCAUGGGGGGCGAUUA	CGCACCUCAGGCCAUUGUUG	...........(((......)))(((......))).....	-5.2	2
SP_0037	38101	39093	+	39130	72	3.8016	37	AUAAAAGAGAUGACAGAAAAAGAAAUUUUUGACCGUAUUG	UGACCAUUAUCCAAGAGCGA	.............((((((......)))))).........	-1.8	3
SP_0038	39099	39332	+	39389	50	2.98314	57	UCAACGGAAGUAGAUGGUUUUUAGAAAUGAGAAAUAUCGG	ACAAGCUGGUAAAAUCUUGG	............((((.((((((....)))))).))))..	-4.7	2
SP_0039	39363	39668	+	39686	39	2.40805	18	UCAAUCAUGAACUAGGAUUCUAGUUUUGCAGGAAGUCUAA	UAGUAAAAAAGUGAUUAGAA	((...((.(((((((....)))))))))...)).......	-6.2	2
SP_0041	39871	40101	+	40142	49	2.51196	41	UUAUGGAUUUUAAAAGUUUUAUUAUUGGUUUAGUAGUUGG	UAUAUUUGGUCCUUAUAUGG	..................((((((......))))))....	-1.1	3
F52	40336	40380	+	40505	154	6.83902	125	UGCCUAGGGUGACAGUAAAAAAUCAAUUUCCUUUCAAUAG	CAUAUUUUUAGUGGGCAGGA	.....((((.((..(........)..)).)))).......	-1	3
SP_0043	42982	44331	+	44394	264	8.8	63	UAAUUUUUAAACUGUGAGAAAGAUUCUUCUUGCAGUUUUU	UCUUUACAAUUUUUGAAAAA	........((((((((((((......))))))))))))..	-12.2	5
SP_RS11535	45210	45353	+	45430	27	27	77	AAAUAAAGGAAUAAGAAUUGAUGGAUAAACGUAUUUUUGU	UGAAAAAAAGGCUGAUUUUC	..........((((((((..(((......)))))))))))	-3.1	6
SP_0045	45410	49135	+	49251	10	10	116	AAAAUUAGGUAUAAAAAAUGACAUACGAAGUAAAAUCUCU	UAAUGAAGAAUGUGGUGUUU	...(((..((((..........))))..))).........	-0.4	3
SP_0049	52537	53046	+	53072	11	11	26	UUACUUAGUGUUUAACUAAUGAUUAAAAAGGAGAAUAUAA	UGACUAAACGCGUCUUAAUC	.......((((((..((...........))..))))))..	-2.7	2
SP_0050	53071	54618	+	54656	1310	47.5578	38	UAAGAAGAUAAAAGGGAAGAAAACAGUUUCUUUCCUUUUU	UGGCUUAAAAUACUAACUGA	.........(((((((((((((....))))))))))))).	-12.8	6
SP_0051	54740	56002	+	56131	32	2.25	129	GAAACUUGGAGACCUUAGGCUCAAAGUUUAGGAAUGAAAC	CGAAGGUUUGCUUCCGCCUC	.((((((.(((.((...))))).))))))...........	-8.4	1
SP_RS11540	56075	56242	+	56345	38	2.375	103	AGACCUUGGGUUUCCAAUUUAGGCAUGAGACACCUUUGGU	GGCUGCUGCCGUCCCUCACA	..(((..((((.((((.........)).)).))))..)))	-7.8	4
SSRC8_2	56084	56177	+	56190	44	2.48071	13	CCAUCACCUAAGACCAUUAUCAAAAAGAAAAAUAAAAAUU	CACAAAAUACGUUAAUGAUC	........................................	0	3
SP_0053	56405	56893	+	56948	89	3.70833	55	UCGGUGGCGGUCAACUGGGUCAGAUGAUGGCCAUUUCUGC	UAUCUACAUGGGCCACAAGG	..((((((.((((.(((...))).)))).)))))).....	-15.7	4
SP_0054	56880	57971	+	57987	38	2.42731	16	GUUUGGGGAAGGGAUUGAUUUUUAGGACAAGUCUAUGAUA	CAAAUUAUCGUUAAUACAUU	((((.(((((........))))).))))............	-2.7	3
SP_0055	57981	58208	+	58315	102	4.81598	107	UCAACCGUUACUCUCGCCCUGAGAUGGCGAAUAUUUGGAG	UGAAGAAAAUAAAUACCGUG	....(((......(((((.......))))).....)))..	-8.1	3
SP_0056	58271	59569	+	59609	9508	65.7373	40	AUUAAAAAAUAAACAGCGAGCUUCAAUCUCGCUGUUUAUU	UUUUAUCGAAAAGACUUAGU	.......(((((((((((((.......)))))))))))))	-16.1	6
SP_0057	59624	63562	-	59574	252	11.1176	50	UAAAAAAUAAACAGCGAGAUUGAAGCUCGCUGUUUAUUUU	UUAAUUAAUCACCUAGUCCA	...(((((((((((((((.......)))))))))))))))	-18.7	7
SP_0058	63890	64606	-	63854	34579	164.193	36	CUAAGAAGAAAACCUGAGCUAAUCGCUUGGGCUUUUUCUA	UGCUUAUUAUACUACACCAA	...(((((((..(((((((.....))))))).))))))).	-13.3	6
SP_0060	64955	66742	+	66743	44	44	1	UAAACCUACACUAAAACAUAUAAAGGGGGAAAACUUAUGA	CAAUUGUAGGAUGCCGUAUU	....(((................)))..............	-0.5	3
SP_0061	66739	67215	+	67247	17	17	32	UUAAAAUAGGAAAAAAAUUUUUAGGAGGUCAUUGUUAUGA	UACAAUGGUGGCAAAUUUUA	............................((((....))))	-0.6	4
SP_0063	68135	68950	+	69036	12	12	86	UGUGAGGAGCUUAGAGGUAGCACAGAAAUGAUUAUGGGCC	CACAAGACAACAUUUACACA	((((....(((....)))..))))................	-2.8	2
SP_0065	69660	70826	+	70914	109	109	88	AAACCAUAGAUUGUCAGUACGCUUUCUAUGGUUUGUUUGC	UUGAGAGAAAUAGUAAAAGG	((((((((((..((......))..))))))))))......	-13.6	5
SP_0069	72674	73309	+	73399	353	35.3	90	GAUAAGAAAGAGGUUGAUGGCGAACAUUGGCCUCUUUUGA	UUUAUAAAGAUUGGAUUCUU	.....((((((((((((((.....))))))))))))))..	-17	5
SP_0071	73761	79331	+	79407	7679	300.684	76	UAAGGAUGAGGAGUCAGAUGACAAAUCGACUCCUUUUUCU	UAUGGAUCGAUGUAGAGAUU	..((((.((((((((.(((.....))))))))))).))))	-16.8	6
trn0027	79336	79386	+	79407	7679	240.595	21	UAAGGAUGAGGAGUCAGAUGACAAAUCGACUCCUUUUUCU	UAUGGAUCGAUGUAGAGAUU	..((((.((((((((.(((.....))))))))))).))))	-16.8	6
SP_0074	80647	81204	+	81240	1333	40.1506	36	AAUAGAAGUAAAAAGGAACAGCUGGGGUUGUUUCUUUUUU	GUAGGUUUCAUCAUUUUUUA	.........(((((((((((((....))))))))))))).	-12.2	7
SP_0075	81421	82185	+	82208	142	9.40964	23	AGUGUUCACCACCUUUAGUUGUACUGGCAAAGGAUUUGUU	UUAUCAUAAAAUGUCUAGCU	...........(((((.(((.....)))))))).......	-4.2	5
SP_0077	82659	82817	+	82964	38	2.33607	147	GUCCAAGUUGAAAGCUCACGAGCGACUUAUUUUGAUCAUC	UUUUCACUGCUGUCUCUGCA	...((((.(((..(((....)))...))).))))......	-4.1	3
SP_0078	82798	84177	+	84282	113	4.40903	105	GUCCUAGCUGCCCUAGCCAAGCAGGAUAUGAAUAUUAUCG	CUAUUGAUGACCACGCAGAG	(((((.(((((....))..)))))))).............	-8.7	4
SP_0079	84191	84856	+	84878	12579	329.45	22	AGUAGCAUUGAAUUCGUAAAGAGGGAUGACCCCUCUUUUU	UGAUGCCUAAGAUGGCAAAU	.................((((((((.....))))))))..	-10.8	6
SP_RS11555	84991	85154	+	85269	34	2.38	115	GAGUCGCUAGUGAUUGGUGGUGAGCAAGUUGGGAUUUUGA	UUAUCAAUGACGGGUCUCAG	...((((((........)))))).................	-5.3	4
SP_RS00415	85166	85705	+	85829	194	13.2877	124	CGAUUUCUAUCGUUAUUUGAUUGGGCGUGAGGACCAGUCU	GUCAAUGAGCAAGUGAUGAU	((((....))))......((((((.(.....).)))))).	-9	2
SP_RS00420	85772	86182	+	86241	4600	164.286	59	GGGAUUUAAGAAAAAUUUUAACUUUUUCUUAGUCCUUUUU	AAUUUCAGGAGAUUAUACUA	((((((.((((((((.......))))))))))))))....	-10.2	6
SP_0082	86298	88871	+	89021	94	94	150	UAAAAAUAGUGUUAUACUUAAAGCAGUAUAGCACUGUUUU	UAUCAAAGGAGAGACAGAUG	..((((((((((((((((......))))))))))))))))	-17.1	5
SP_0083	89038	89736	+	89807	189	11.6757	71	UUAUUUCAACCCUCUUAACCAUUUUGGUUGUUUUUUGGGC	UGUUCAAAAAAUGCUGAUUG	.........(((...((((((...))))))......))).	-7.6	4
SP_0084	89733	90785	+	90854	185	13.5366	69	GUAGAAUAGAUUUUGUGUGAAAUAUCAGCAGGAAAGCAUG	AAGCUCGUCAACAGGUGUCU	..........((((.(((((....))).)).)))).....	-3.8	1
SP_0085	90980	91591	+	91657	48219	330.899	66	GAUAUUAAGCACUUUGGGACGUUCUCCCUUAGUGCUUUUU	UGAUUUCUCUUAGUAUCCAG	......(((((((..((((.....))))..)))))))...	-16	6
SpF01_sRNA	91593	91664	+	91664	121	121	0	AGCACUUUGGGACGUUCUCCCUUAGUGCUUUUUUGAUUUC	UCUUAGUAUCCAGCUAUAAU	((((((..((((.....))))..))))))...........	-14.7	5
SP_0086	91769	91927	+	92054	59	3.38718	127	AUUUCAAACUACUAUAAAAGUUCUAUAAUCUCUUUAUAAG	AUUUGCCCAUCAGACAAAAU	......((((........)))).(((((.....)))))..	-1	4
SP_0088	92236	92505	+	92532	142	4.72755	27	AAGGAAUUAAGUAAACUUCUUAAAGACUCAAACCUUGAAA	CAGUAGAUAAGGAUGUCCUU	.((...(((((.......)))))...))............	-1.4	2
SP_RS00455	92459	92680	+	92743	12411	113.458	63	UUAGGAACUAUCGCUGAGUUCCCUAGUCUGGAGAUUUUUC	AGUAUACCCCGUUGUUGGAU	...((((((.......))))))..................	-6.4	5
SP_0092	95123	96598	+	96691	68	68	93	UGCUUUCCUCAGGUUGGUCUGGGGAGGGCAGUGGUUUUUU	UGGCACAAGGAUAUAGAUAU	((((((((((((......))))))))))))..........	-18.6	6
SP_0095	96870	97856	+	97887	35404	414.428	31	UACUGUAUAAGAUCAAACAGUCCUCAGGGGCUGUUUUUCU	AUGCUUUGUACUCAAAAAUC	.........(((..(((((((((....))))))))).)))	-13.1	6
SP_0096	98131	98991	+	99025	160	6.34921	34	AAAGUAAAGCAGAAGCAGGUCAAUCGACUUGCUUUUUUGA	CAUAGAAAAAAUCCUGCCAA	..........(((((((((((....)))))))))))....	-13.7	6
SP_0097	99169	100233	-	99030	10107	346.498	139	UCAUUGAGUAGCAAUCCUGUCAUCCUUGGCAGGAUUUUUU	CUAUGUCAAAAAAGCAAGUC	............((((((((((....))))))))))....	-13.7	6
SP_0098	100296	101207	-	100232	1707	57.1859	64	UGGAAACAUAUUUAUCUAACUAAAAAGGAGGUUCUACCAU	GAAACAAGAAUGGUUUGAAA	.............................(((...)))..	-1.1	3
SP_0099	101200	101793	-	101155	177	8.57934	45	CAAAAGGAUUUCUCAUCUUUGGUGUGGUGACUACCGUUAU	CGGCUUUAUCCUGCUUUUUG	...((((((.....))))))(((((....)).))).....	-5.5	3
SP_0100	101780	102106	-	101757	337	9.09621	23	GCCAUGACAAGAACUGAAUACCUGACUCAGCUAGAACUCU	AUCUCAAGAAACUACCUGAA	.............((((.........))))..........	-1.8	2
SP_0101	102245	103411	-	102218	2328	40.1379	27	UAAGAUCCUUUAAACUUCUAGUUUUAGCUAGAAGUUUUUU	AUAUAUAAAAAUUUUACACA	...........(((((((((((....)))))))))))...	-12	6
SP_0102	103469	104626	+	104750	68	3.62412	124	AUUUUAAAUAAACAACAAAAGCAGGUUUUCUGGGGAAUAU	UUGAUAUUUUCAGUAUGGUG	.....................(((.....)))........	-1.4	2
SP_0103	104668	106518	+	106572	15377	235.629	54	AUAGUAUCAAGUUACACAACCUUGGUAAUAUGCGUUUUAU	UAUGUAGAGACUUAUACUCU	(((.(((((((.........))))))).))).........	-4.6	5
F2	106533	106577	+	106719	200	3.66057	142	UUUUGAGCUGACUUCGUCAGUUCUAUCCACAACCUCAAAA	CAGUGUUUUGAGCUGACUUC	....((((((((...)))))))).................	-10.1	1
SP_RS00525	106543	106906	-	106520	166	10.641	23	UUACCAAGGUUGUGUAACUUGAUACUAUGCGUUUUUCUUU	UUUAUUCAAUGUGGGUUGUU	....((((.........))))...................	-2.7	7
SP_0104	106956	107588	-	106893	93	4.42857	63	UUCAGAAGAAAAUGAAGUAAUACUCAAUGAAAAUCAAAGA	GCAAACUAGGAAACUAGCUG	((((........))))........................	-1.4	1
SP_0106	108491	109162	-	108481	29	2.26562	10	CAUCUCCACAAUGUCAAUUUCUUUAAAUAGGAGGAAGCAU	GUUUUAUUCUAUCAAAGAAU	..........((((...(((((......)))))...))))	-4.1	1
SP_0107	109404	109991	+	110044	87272	164.751	53	AAAUAAUAUGUAAAGAGUCGAGGAAAUCCCUCGGCUUUUU	UAUCUUUCCUUCGCUUGGUA	...........((((((((((((.....))))))))))))	-15.5	5
SP_0108	110043	110363	-	110025	10	10	18	UUACCAAGCGAAGGAAAGAUAAAAAAGCCGAGGGAUUUCC	UCGACUCUUUACAUAUUAUU	............(((((..................)))))	-1.8	3
SP_0109	110794	111081	+	111116	500	8.36431	35	GAGUAAAAUUCUUCCCUCUCCUAUUUGGAGAGGGAAAACU	GUAGUGGAGGCACUUUUAUG	...........((((((((((.....))))))))))....	-19.1	1
SP_0111	113238	113879	+	113984	2432	147.394	105	GCCUAGGAAUGAUAUUUUUAUGUCAUUUUCCUGGGUUUUU	CUGUUUUAAAUUGAAAAAAA	(((((((((((((((....)))))))..))))))))....	-16.9	5
SP_0112	114086	114892	+	114910	18	18	18	UUAAAGCAUCCAUUGAAAAAUAGAAAGAAGGAAAAGAACA	UGAGUAAAGAAAAAGUAAUU	........(((..................)))........	-0.4	0
SP_0113	114909	115328	+	115379	139	139	51	GGUUCAGAAUAAGAGGUUGGUAGAUUAUCAGCCUCUUUCU	UGUCGUUGAAAAAGUGAGAU	.....((((..(((((((((((...)))))))))))))))	-14.8	5
SP_0114	115515	115835	-	115483	63	63	32	AAUUAUAAAAAAAGUCGAGGGAGCUCCUCGACCUUUUCAU	AGAAUCGCCGAACGAUUUAA	........((((.(((((((.....))))))).))))...	-12.3	5
SP_0115	116593	116973	+	117057	80	5.39326	84	AGUUAUUUAUUGUAUAUAUGUGUAGGAAUAGCCCCUUUUU	UUCACGUAUAUAUAAUAGGU	.(((((((..(((((....))))).)))))))........	-2.9	5
SP_RS11565	116975	117172	+	117235	3936	194.244	63	UAUCUAAAAACAGAGGUUGGUAGAUUAUCAGCCUCUUUCU	UGUCGUUGAAAAGAGUGAGA	...........(((((((((((...)))))))))))....	-13.5	5
SP_0116	117631	117870	+	117989	47	47	119	GAUUUAUCUAAAAAUACUAUGAAAUUGGACGUCAUAUUUU	UUGAGGAUAAAAAUAAAAGA	(((...(((((.............))))).))).......	-1.7	5
F4	118118	118166	+	118166	160	160	0	UGGCUAUAAAGAUUGUCCGCAGGCUUAAGCUUGCGUUUUU	UGUUGUUUAACGAAAUUAAA	.(((..........)))(((((((....))))))).....	-10.8	5
SP_0117	118423	120657	+	120713	1122	22.8049	56	UCAUGUUAAGAACAUUUGACAUUUUAAUUUUGAAACAAAG	AUAAGGUUCGAUUGAAUAGA	..(((((((......)))))))..................	-3.8	0
F5	120678	120848	+	120848	267	9.10227	0	ACUUGAAAAAUAGAUUAGAGAAAAUGGGUUGUUUUAUUUA	UUAUAGUUAUUUGAAUGAAG	......(((((((.(((.......))).))))))).....	-1	6
trn0052	120766	120838	+	120844	12523	123.854	6	UCUAACUUGAAAAAUAGAUUAGAGAAAAUGGGUUGUUUUA	UUUAUUAUAGUUAUUUGAAU	(((((((........)).))))).................	-2.9	6
SP_0118	121058	122179	+	122293	5589	71.3318	114	GGCUUUUUUGUCCUGCACUUCUUUGUAGUUUUGACUGUUU	UUGUGUCGUUUAAGGGAAAG	(((......)))(((((......)))))............	-5	4
Spd-sr37	122217	122283	+	122293	5589	58.78	10	GGCUUUUUUGUCCUGCACUUCUUUGUAGUUUUGACUGUUU	UUGUGUCGUUUAAGGGAAAG	(((......)))(((((......)))))............	-5	4
SP_0119	122293	122775	+	122789	33	2.11538	14	CUAAGACACAUUCAUCUUGAGGAAUAGGAGAGAAACAUGA	CUUAUCAUUUUACUGAAGAA	..........(((.((((.........)))))))......	-2.4	1
SP_0120	122785	124698	+	124788	88	4.19957	90	CUCCAGCCUCCCAUAGUUUCCCGAACUAUGGGAGCUAACU	CAAGUUAUGCUUUCGCUUAG	....(((.(((((((((((...))))))))))))))....	-18.2	2
trn0057	124989	125051	+	125052	31	31	1	AGAGAAAAACAGCUCCGAGGACGGGGCUGUUUUCUUGCUU	UAUUCUUCAUCUGGUGUGAG	.(((((((.((((((((....)))))))))))))))....	-19.3	5
SP_0121	125051	126730	-	125013	22202	414.991	38	AAAGCAAGAAAACAGCCCCGUCCUCGGAGCUGUUUUUCUC	UAUGCUUUCUUUUGAGAUUA	.......(((((((((.(((....))).)))))))))...	-15.4	6
SP_0122	126732	126965	-	126666	105	3.53571	66	AAGUCGGCGUUUUUGCCAUCGGUGGUCUAGGAGAAAUCGG	GAAAAACACUUACGGAAUUG	.....((((....))))..((((..(((...))).)))).	-7.8	1
SP_RS00630	127245	127460	+	127485	53	53	25	UGAAUUAAAUGCUUAGAUGCCCUGCUUAUGCUGGGGUUUU	UUGUUUGGGAAUGUAGAGAU	..................(((((((....)).)))))...	-8.7	4
SP_RS11575	127592	127789	-	127521	65	5.90909	71	GCAAAGACCACCUCAUCUUGAUAGAUGGGGUGGAAUUUUC	GUGUCGUAAAUCUACUAUCU	.......(((((((((((....))))))))))).......	-18.6	4
SP_0127	128300	128983	+	129092	48	2.9313	109	UACCUAGUCAGUCCUUGGACUCUGGAGCAAAUCCAAGCAG	AUCUGUCCCAAGACCAGACU	.....((((........)))).((((.....)))).....	-6.4	0
SP_0128	128980	129417	+	129426	48	2.69159	9	UUAUCAUGAAGAGAGAAAUAGAUGAAGGAUAGAUAUAUUU	UAGCAUUUGAGACAUCCUGU	(((((...............)))))...............	-0.7	5
SP_0129	129407	130417	+	130495	2600	119.885	78	AGCUGCAAUCUGGAGAGUACGAAAUUCGUACUCUCUUUUU	UGAUGUUCAAAGUCAUCAAA	...........(((((((((((...)))))))))))....	-15.7	6
F6	130439	130495	+	130495	2600	167.742	0	AGCUGCAAUCUGGAGAGUACGAAAUUCGUACUCUCUUUUU	UGAUGUUCAAAGUCAUCAAA	...........(((((((((((...)))))))))))....	-15.7	6
SP_0134	133565	133771	+	133901	14	14	130	AAUUUCAGGUUACUUGGUGAAAUCUAUCCAGCUACUAUAG	UUUACCAAAUAUCGGAUUUA	.......(((..((.((((.....)))).))..)))....	-3.4	3
SP_0141	139839	140702	+	140844	79	4.27027	142	UACCAGAGAAGUAAUCAAAUUCACCAAAAUCGCAAAUCUG	AAAUUUCUAUAAGAAAAAAU	...((((...((...................))...))))	-0.8	2
SP_0143	141243	141920	+	141933	68	3.6	13	UGUUACUUUAUUGGUAUUUGGAUAUUAGAAAGGUGAUAUA	UGAAAAAGAUAAUCUCACAC	(((((((((.(((((((....))))))).)))))))))..	-9.2	3
SP_0145	142666	143895	+	143943	1706	69.4302	48	UUUCUAUAAUAUAUGUUUGAGACUGGAUUGCCAGUCUUUU	UAUGAUGGUCAAAAUCAACA	..................((((((((....))))))))..	-11.2	5
srn026	144217	144338	+	144353	11	11	15	AAAACAGUGUUUUGAGCAACCUGCGGCUAGUUUCCUAGUU	UGCUCUUUGAUUUUCAUUGA	....(((.(((......)))))).((((((....))))))	-6.3	4
SP_0148	145513	146343	+	146387	18163	230.746	44	CUUGAAAUCAUCCAUUCUGAGUAAGGUGGGUGGUUUCUCA	GUUUUUAGGGAUAUAGUUUU	...((((((((((((.((.....))))))))))))))...	-15.7	4
SP_0149	146497	147351	+	147394	4779	95.1475	43	AGAAACAGGGAGGUGGGAGAGAAAAUUCCACCUCUUGCUU	UUGUAUAGAGUAUAGAUUGU	.......(((((((((((.......)))))))))))....	-16	5
SP_0150	147451	148824	+	148930	31	2.28571	106	UUAAGGAUGUGACCAUUCACAUCCAAGAAGGGGAUAUCUA	CGGAAUCGUUGGAUAUUCUG	....((((((((....))))))))................	-11.7	3
SP_0151	148817	149878	+	149881	29	2.15541	3	CAGGUGUACAACUAAAAGUAUUGAAGGGAGUACAGUAAGA	UGGAAUCAUUGAUUCAAACC	..(.(((((..((............))..))))).)....	-5.2	1
SP_0152	149880	150572	+	150593	202	10.2278	21	AGAAAUUGAGCCAUAAAUAAAAAAGAGCCGCGUGGCUCUU	UUUAACUGAUCAGAUUUUCU	......................(((((((....)))))))	-9.9	4
SP_0153	150602	151171	-	150571	247	16.4667	31	AAAAUCUGAUCAGUUAAAAAGAGCCACGCGGCUCUUUUUU	AUUUAUGGCUCAAUUUCUUA	...............((((((((((....)))))))))).	-12.8	7
SP_0155	151898	153568	+	153706	30	2.30769	138	GGUCGUCGCAACAGCCAGUCAUGCCGAUGAAGCUCUAGAA	UAUGUUCAGGAAAAUCCUGU	..((((((((((.....))..)).))))))..........	-6.2	2
SP_0156	153580	154866	+	154866	241	9.64	0	CGCCAAAAGCCUACCGAAAACAGGUAGAAACUAUACUAUA	AGAUUUGUAUUCCUUUACAA	..........(((((.......))))).............	-6.7	3
SP_0157	154870	155451	+	155499	78496	318.137	48	CAAAAAAGAACUAUCAAGAUACAAUCUUGGUAGUUGUUUU	UUGAUUAUAGAUAAAAUCAU	...((((.((((((((((((...)))))))))))).))))	-15.3	6
SP_0158	155529	155999	+	156054	112	5.49319	55	CAAAGAGCAAACUAGGAAGCUAGUCGCAGGUUGCUCAAAG	CACAGCUUUGAGGUUGCAGA	....(((((((((((....)))))......))))))....	-11.3	1
SP_RS11585	156006	156092	+	156229	8817	310.206	137	UAAGUUCAGGUCUUCAAAACCUUGUUCUUAUGCUUUUUAU	CAUAGAAAUAUUUGCUGAAU	((((..(((((.......))).))..))))..........	-5	6
SP_0159	156292	157554	-	156177	317	17.9434	115	AGAACAAGGUUUUGAAGACCUGAACUUAUGCUUUUUUACG	UUCUUAAAGACUGUUUAUAC	......((((((...))))))...................	-4.2	5
SP_0160	157864	158322	-	157818	148	12.3333	46	CAUAAUAAGCAAAUCCGAGAAAGAAACUUCUCGGUUUUUC	UUUAUCCUGCUGCACCUUAC	..........(((.(((((((......))))))).)))..	-9.7	5
SpF56_sRNA	158993	159090	+	159235	42	2.7033	145	GGCACACUAUUAGCAACAAGAUUAAAAAAUAGACGGAAAG	AAUUAAAAAUGUCUCAGCGA	........................................	0	0
SP_0163	159192	160058	+	160092	3889	77.1372	34	AGAAUAAUGAAUACGGUGUUCAAGUGAGCAUCGUUUUUCA	AACCUAGUUCAGAUACAAAA	.......((((.(((((((((....)))))))))..))))	-13.2	5
SP_0171	165235	165468	+	165513	20	20	45	UAUAAACUCUCCGUCUACUUGUCCUGCAACAAUUGAAGUC	UGCUCAAAACGCCGUCCGCU	..................((((......))))........	-0.3	3
SP_0173	165751	167700	+	167790	1794	31.389	90	AAUCAGGUGUUCAAAAACCUUGAUUUUAUGCGUUUUAUCA	UGGAAAUAGUUACUUCAUUU	(((((((.(((....))))))))))...............	-6	5
SP_0175	168025	168492	-	167951	54	3.97895	74	GGCAAAAUCGCAAUUUAAUGCUCUGUGAAAAUCAUAGAGC	AAACUAGGAAACCAGUCGCA	.((......))........(((((((((...)))))))))	-11.9	1
SP_0176	168493	169698	-	168491	29	2.9	2	AUCGAAUGGGUCACAUUUUAAAUAUGGAGGAAAAAUAAAU	GAACACUUAUGAAGGUAAUU	...(((((.....)))))......................	-2.3	2
SP_0177	169718	170353	-	169696	45	3.25301	22	UAUCAAAAUGGAUUUUAGCAGAAAGGAUAAUCAGUCAAUG	GAAUAUCGAAAAAUACAAGA	((((....((........)).....))))...........	-2	2
SP_0178	170338	171438	-	170301	28	2.33333	37	UAAUUGAAGAAAUCGGAAAAGUUGAAAGAAUACAGAAAGA	CUCUCGUAAUUGUAAACUAU	........................................	0	0
R1	171483	171628	-	171453	79	5.26667	30	UUGUAUGCCUUGAGUAGUCCCCUAUUCAAGGUAUAUUUUU	UUGGAGGUAGCGAGAUGAGC	..(((((((((((((((....)))))))))))))))....	-18.9	6
srn029	171513	171666	-	171453	79	4.64706	60	UUGUAUGCCUUGAGUAGUCCCCUAUUCAAGGUAUAUUUUU	UUGGAGGUAGCGAGAUGAGC	..(((((((((((((((....)))))))))))))))....	-18.9	6
FMN	171572	171686	-	171453	79	3.51111	119	UUGUAUGCCUUGAGUAGUCCCCUAUUCAAGGUAUAUUUUU	UUGGAGGUAGCGAGAUGAGC	..(((((((((((((((....)))))))))))))))....	-18.9	6
SP_0179	171843	172436	+	172529	138	8.09259	93	ACAUCGCCUAUCAUGAUGAGGAGUGGGGCCAGCCCCUCCA	UGAUGACCAAGUAUUGUUUG	.(((((.......))))).((((.(((.....))))))).	-14.1	1
SP_0180	172446	173009	+	173118	157	9.22139	109	GUUAAAUUGCUGGCUUCUUUAAUGCCAUCUGCCAUUGCAA	AUUAUCUUGUUUAUGUAGUU	......((((((((................))))..))))	-6.8	2
SP_0181	173006	173683	+	173826	1772	53.5347	143	UACCGAGAAAAAAGCUGAGAAACUUUUCCCAGCUUUAUUU	GUUAUAGUCAAAGAGAAUGA	..........(((((((.(((....))).)))))))....	-9.9	6
SP_0182	173820	174851	-	173792	4075	79.477	28	UAUAACAAAUAAAGCUGGGAAAAGUUUCUCAGCUUUUUUC	UCGGUAUCAUUACUGGCAUU	..........(((((((((((....)))))))))))....	-13.3	6
SP_0184	175106	175789	-	175065	6497	77.4605	41	AAAACGAUAAAAGCAACUGCAGGUGCGGUUGCUUUUUCAC	UUACUUUUUUGAGUUAUAUU	.....((.((((((((((((....))))))))))))))..	-17.2	5
SP_0185	175801	176745	-	175742	65	3.38183	59	AAUUGAUCUACAAAAAUUAACUAAGAAAAACCAAGAGUUU	GUCCACAUUGCUACCCAACA	........................................	0	3
SP_0186	176877	179708	+	179765	30	2.00669	57	CUAGCUAAAAUGCAAGAAAAAGAACUAGAUGGUAUCAUCA	UCAACAAUCUUAAAAACGUC	((.((......)).))...........((((....)))).	-5.1	3
SP_0187	179701	180762	+	180830	1078	80.3478	68	UGACGAAAAAAGUCAAAAAAAAUUAAAAAUAGGUCGCAAG	UCGGAUGUUUUUUAUGGUAU	((((.......)))).........................	-3.3	1
SP_0189	180894	181292	+	181328	96799	508.805	36	UAUAAACAUCAAGGCUGGGAGCACUUCCCAGUCUUAUUCU	AUUUUAAUUUCAAAAAGAAA	..........((((((((((.....)))))))))).....	-15.3	5
SP_0191	181358	181927	+	182015	842	23.7818	88	UGCUAUAAUGGUACUAUUCUAAGGAAAGAGGGUGUUAGAA	UGGGAUUUACUGAAGAAACA	(((((...)))))...((((((.(........).))))))	-3.6	3
SP_0192	182014	182280	+	182342	585	7.5637	62	GACGUCGGUUCAAAAACGGUAGGGGUGGCGAUUAGCGAUC	CGCUUGGUUUUACAGCUCAA	..(((((.(((..........))).)))))..........	-6.6	2
SP_RS00945	182284	182703	+	182720	1069	10.8164	17	AAUUAUUUAGAUAGAAAAUUUUAAUAUAAAGGAGAGGCUA	UGUCACACGAUCAUAACCAC	..(((((((((........))))).))))...........	-0.5	1
SP_0194	182719	183024	+	183058	1359	10.1974	34	GGAGUGAUACAGUCUGGGAGACUGUAUCAGCCCAACUCCC	AGAAAUGGGGAAGAGUUGGA	((..(((((((((((...)))))))))))..)).......	-19	1
SP_0197	183277	184533	+	184616	28	2.02899	83	GAGAAAAUUUCUCUAAAUUGGUAGCAGAAAGGAAAUUCAU	CAUGAAAUUAAAAAGAUUCA	(((....((((((((......))).))))).....)))..	-4.5	3
SP_0198	184530	185075	+	185119	12039	166.35	44	UAUGCAAGUAGAAAGGGCUGGAUUUUUCAGCCUUUUUACU	UUUACCUAGAAAAUAAUCAU	......((((((((((.(((((...)))))))))))))))	-15.2	6
SP_0199	185221	186753	+	186794	396	20.8421	41	GAAAUCUAGGACUUAGGAUACAAACCAGACCUAUUUUUCU	UGUCUUUUACGAAUAGAAAG	((((..((((.((..((.......)))).))))..)))).	-7	6
SP_RS00970	186831	186974	+	187012	32	2.66667	38	UGAUAUACUAAGACAGAUAAAUUGAACAGGAGAAACGAUA	UGAGUGUGUAUGGUAGAGUA	........................................	0	1
SP_0200	187011	188550	+	188615	3911	96.33	65	UAAAAAUUUUAGGAUUUUUAACACAAGAUAUUGAUUUUUC	UUUUUAGAGUGGUAUAAUAC	((((((((....))))))))....................	-2.2	5
SP_0202	188664	190877	+	191011	61	3.20404	134	AGAAAGAACGCUUGCUUAGCUUCAGAGAACAAUUUUUAAA	CAAGAACAAGAAAAAAUAAA	.....(((.(((.....)))))).................	-3.8	5
SP_0203	190889	191029	+	191056	2774	72.7266	27	ACAAGAAAAAAUAAAAGUGAGAGCCAGCUCUCGCUUUUCU	CAUAGUGGGAGGUAAGGAUG	............(((((((((((....)))))))))))..	-13.2	5
SP_0205	191572	192162	+	192188	54	3.08571	26	GUGAAGAGAGAAUGAAGAAAAAGGACUUAGUAGACCAACU	AGUCUCAGAGAUCGAGACGG	......................((.((....)).))....	-1.4	1
SP_0206	192159	192461	+	192468	19	19	7	UAUCCUUGCUUGCAGGCGGGUAUGGAUGUCUUGACAAUUG	AAGAACCUUGGAAGGCUAGU	(((((.((((((....)))))).)))))............	-10.1	2
SP_0207	192437	192775	+	192900	1908	64.872	125	AAACAGCAACAAAUCCCUUGCAAUCGCAGGGGCUUUGUGU	UAUUCUAUUAUGGUGCUGUA	........(((((.(((((((....))))))).)))))..	-16.2	5
SP_0208	193042	193350	+	193422	15799	51.8671	72	UCAAUCUAAUUGAACACGGGCUAAACUCGGUGUGAAAAAG	AUAAACUUCCUAGUGUCUGC	(((((...)))))((((.((......)).)))).......	-5.7	1
SP_0209	193567	194193	+	194255	361	9.5466	62	ACAAUGGCAAACGUAACAUUAUUUGACCAAACUGGUAAAG	AAGCUGGCCAAGUUGUUCUU	....(((((((.(......).)))).)))...........	-2.9	2
SP_0210	194218	194841	+	194863	371	6.06694	22	CGAGGAGGUUCUUGCAUAAUGAAUUUGUAUGAUGUUAUCA	AAAAACCUGUCAUCACUGAA	.((.((.(((..((((.........)))).))).)).)).	-4.1	4
SP_0211	194841	195137	+	195156	873	8.4022	19	GUUUGCUGCUGAAGCUGAAUAAUCUAAGGAGGAAAUAUCG	UGGGAAUUCGUGUUUAUAAA	((((.((.((................)).)).))))....	-4.9	2
SP_0212	195155	195988	+	196066	2101	14.3785	78	AGCUCGGUAGCGCUCCAUAGGAGUGCAAGCCGCUGUGGUA	CAACAUUUAAAGGAGAAAAU	.((.((((.(((((((...)))))))..))))..))....	-15.9	3
SP_0213	196092	196373	+	196506	2352	13.8167	133	AUCCGUGGUAAAAGCGUAGCCGAUGCAAUCGCAAUCUUGA	CAUUCACUCCAAACAAAGCU	....(((((....((((.....)))).)))))........	-4.8	3
SP_0214	196385	196729	+	196864	805	9.27204	135	ACGCGGAUUACCUUCAUGAAGAUCUUGCAAUCCGUAAAUU	CGUUCAAAAAGAACUUGCUG	..(((((((.(..((.....))....).))))))).....	-6.6	3
SP_0215	196742	197395	+	197437	3413	20.3627	42	CAAUGUUAGUACCUAAACGUGUUAAACACCGUCGUGAGUU	CCGUGGAAAAAUGCGCGGUG	..(((((........)))))......(((....)))....	-2.4	3
SP_0216	197399	197812	+	197945	7495	51.0914	133	GAAAAAAGAAUUGUUUGAACUUCGUUUCCAAGCUGCUACU	GGUCAAUUGGAACAAACAGC	............(((((...........))))).......	-2.2	3
SP_0217	197822	198028	+	198054	1633	9.11814	26	UCUGAAGCGAAAUAAUAGACUAGGGAAGGAGAAAUUUCAA	UGGAACGCAAUAAUCGUAAA	(((..(((.........).))..)))..............	-0.9	3
SP_0218	198053	198313	+	198359	6378	61.1695	46	CCUGAAAGGAGAAAACUGAAAUGAUUCAAACAGAAACUCG	UUUGAAAGUCGCAGACAACA	........(((....(((............)))...))).	-2	1
SP_0219	198339	198707	+	198760	4377	42.8727	53	AACUAGUCCCCUAGCUUCAAGCUAGGGUGCCCUUAUGGGC	GUAAGAAAAAUCAAGGAGAA	........((((((((...)))))))).((((....))))	-19.2	3
SP_0220	198785	199090	+	199225	2471	21.6027	135	AUCAGUGAUGGCUGUGCCUAAAGUAGAUAAGAUUGUUUUG	AACAUGGGUGUUGGUGAAGC	..((((....))))..........................	-2.9	6
SP_0221	199114	199656	+	199657	1022	8.13622	1	UGCAUUGCUUACAGGCCUUGGAAUGCCUUUUGCAAAAUAA	UAUAGGAGGUAAAUCUAAUG	....((((....((((........))))...)))).....	-8	1
SP_0222	199674	199943	+	200029	1637	36.014	86	UUGACGAAGAAACUAAAGUUUCUAGGAAAGUUUAUCUUUU	UCACACAGAGUUUAGCCCGG	.......((((((....))))))..(((((.....)))))	-5.4	6
trn0093	200024	200092	+	200218	1338	7.55472	126	UUAACUAGCAAGUGCAACUUGCAAACUACUAGUAAGAGGA	GAAAAACAAAAUGGUUAUGA	...(((((....((((...)))).....))))).......	-7	1
SP_0224	200228	200626	+	200727	2296	15.7276	101	ACAAACAAGCCAACUUAUCUAUUUUGCACAGUUCUUAGAG	CGUGUUCAGUUCAGCUCUUG	.................((((..............)))).	-0.4	3
SP_0225	200818	201354	+	201395	2985	17.1064	41	UGUUGAGUGGUUGAUCAUCAACCACCAACCUAUUUUCCAA	CUUUGUGCAUAGCACACGAU	.((((.((((((((...))))))))))))...........	-14.8	4
SP_0226	201438	201794	+	201840	644	5.54365	46	GGACACUAGAAAAUGGCAUUUAAAGACAAUGCAGUUGAAU	UAGAAGAACGCGUAGUUGCU	...........(((.(((((.......))))).)))....	-3.3	3
SP_0227	201812	202306	+	202335	503	7.77922	29	GAUUUGGCAUAAGAAAGGGGAUAAAAUGGCUCAAAUUAAA	AUUACUUUGACUAAGUCUCC	((((((((....................)).))))))...	-3.6	2
SP_0228	202278	202502	+	202545	29953	105.941	43	AAGUUUUAGGGGAUGUGCACUGUACCAUCCCCUAAAACUA	GAUAUAGUCAUCUAUGAUGA	.(((((((((((((((((...))).)))))))))))))).	-22.9	2
srn049	202519	202622	+	202622	4529	72.7697	0	GAUGGGGGAGACAACCUUUUCUCCCUUAUCGGCGCUAGCA	UUUUACAAAAGAGGAGAAAA	(((((((((((........))))))))))).((....)).	-18.5	1
SP_0229	202647	203087	+	203209	521	6.49258	122	UUUAUCGUUUUGGUCUUUCGUAUCGGAACUAGCAUUACAG	UUCCUGGUGUGAAUGCCAAU	......(((((((((....).))))))))...........	-5	2
SP_0230	203100	204410	+	204492	20443	30.2906	82	UAAACUCUGACAUUUGUAAGAGUUGGAUCUCCCCUCUUCU	AUUUUGUUUUUAAAUCGGGG	..((((((.((....)).))))))((......))......	-7.1	4
SP_0231	204561	205199	+	205315	109	4.79191	116	GUCUAGAGGCAUCGAAUCGAAAUUUAUGGAGGUGCUUUUG	CGUGGCAAAAGACGAUGUGA	...((((((((((.................))))))))))	-8.8	5
SP_0232	205316	205534	+	205560	1403	11.8597	26	UACCGCUUUAAAUAAUCGAAAAACUUGGAGGGAUAAGAAA	UGAAAGUAAGACCAUCGGUC	..((.((((((.............))))))))........	-3.4	1
SP_0233	205559	205675	+	205817	1244	5.69678	142	ACAUCUAAGAAAAUUUUGGCUGCUGCUGGAAUCUCAGAAG	AUGUUCGUGUACGUGAUCUU	...(((.(((...(((((((....)))))))))).)))..	-7.6	1
SP_0234	205693	206058	+	206133	1057	4.46058	75	UAAACGUCGUGUGAAAAAGAAUAUCGAAUCUGGUAUUGCU	CAUAUUCACGCUACAUUUAA	...................(((((((....)))))))...	-3.2	4
SP_0235	206076	206459	+	206566	1496	9.27043	107	AUAACAAAAAUUGAUGAAAAUAAAGAUUAUGGCAAGUUUG	UAAUCGAACCACUUGAACGU	........................................	0	3
SP_0236	206502	207437	+	207516	9298	34.482	79	AGCUCACAACGUAAAGCAAUGCUUCGCGAUUUGACAACUG	ACCUUUUGAUCAACGAAUCA	...(((...(((.((((...)))).)))...)))......	-6	1
SP_0237	207449	207835	+	207964	116672	49.3987	129	GAACACUCAUCAUAAGUUGGGAUAGUAGACGCUUGUUUAC	GAAAUUGUUUUUUUCUUAAG	.....((((........))))...((((((....))))))	-6.2	5
L17DE	207851	207923	+	207964	116672	29.4094	41	GAACACUCAUCAUAAGUUGGGAUAGUAGACGCUUGUUUAC	GAAAUUGUUUUUUUCUUAAG	.....((((........))))...((((((....))))))	-6.2	5
SP_0238	208100	208366	+	208368	114	5.82283	2	CAGAGUGCAGCGAUUUUCGAAGCUAUGUAUAAUAUCUAGG	AGGUCAUCAUGGAUAUUAGA	....(((((((..........))..)))))..........	-3.4	3
SP_0239	208376	209713	+	209756	63	3.25378	43	AAAUAGGAGAAAUUUUAAGUUCUAUUUAAGAUUAGACGUG	UAUACUAUAAUCAUUAAAUA	((((((((...........)))))))).............	-3.8	2
ccnE	209768	209915	+	209915	9972	224.932	0	AUAAUCUCCUUCAAAAGUCGCCUGUAUGGGUGGCUUUUAU	UUUAUCAUUCAUGAUAUAAU	............(((((((((((....)))))))))))..	-13.1	5
SP_0240	209900	210649	+	210743	10759	121.28	94	AGAAAAAACAGCCGAGGGCACUCCUUUCGGCUGUUUUUGA	UGUGGAAAACUAAAGUGUAA	...(((((((((((((((.....)))))))))))))))..	-20.3	5
SP_RS11630	214724	214786	-	214709	60	5	15	AUCACUCAGAAGAAUAGUAAAAUAGGCUAUUCUUCUUUUU	GUAGAGAAUUUUACUCUAAU	.......(((((((((((.......)))))))))))....	-12.5	7
SP_0245	215094	215870	-	214988	1736	101.126	106	CAAAAGGUUUAGCUAAAAAAUUUUAGCCAAACCUUUUCUA	UUUUACCUUGCUCUAGAAUU	.(((((((((.((((((....)))))).)))))))))...	-14.5	5
SP_0247	216751	217731	+	217765	1764	48.3288	34	UGAGUGAAAAUGAUAGACUGAUUCAGUUUAUCGUUUUUCU	UUUUAGUUGAUUGCACAUUU	.....(((((((((((((((...)))))))))))))))..	-14.5	6
SP_0252	222523	223191	+	223210	83	7.90476	19	UCAAAAUAGUCGUUCCAUUUAGAUAGAGAGGAAAUACAUA	UGAGAAUUUUUGCUAGUCCU	........((..((((.(((.....))).))))..))...	-3.9	2
SP_0253	223209	224297	+	224336	949	19.8299	39	AAACAAUAAGGACUACUGUUUUCCAAAUGGUAGUCUUUUA	UUGAUCCCUGUAUUGAAUUC	.......((((((((((((((...))))))))))))))..	-12.9	5
SP_0254	224752	227253	+	227376	14632	430.775	123	UAAGAUAGGAGUCCUUCAGAGUAGAAUCUGGAGGAUUUUU	UGAAUCUUCUUAUGAAAGUA	......((((((((((((((......))))))))))))))	-17.1	5
SP_0255	227448	228143	+	228235	40	2.66667	92	AUGUUUUGCAUCUCUAUCAGGCUGUCGGUUGGACAAACUA	UACCCAUCAAACAGAGAUGC	..................((..((((.....))))..)).	-5.8	1
SP_0256	228155	228571	+	228718	1015	49.7143	147	CACAAUCUCCUAAUGAAGCCACCCAAUCAGGUGGCUUUUU	UGCGGUACGACGGGCAUGUC	..............(((((((((......)))))))))..	-14.2	5
ccnA	228626	228718	+	228718	1015	54.8649	0	CACAAUCUCCUAAUGAAGCCACCCAAUCAGGUGGCUUUUU	UGCGGUACGACGGGCAUGUC	..............(((((((((......)))))))))..	-14.2	5
F8	228667	228720	+	228720	142	6.17391	0	CAAUCUCCUAAUGAAGCCACCCAAUCAGGUGGCUUUUUUG	CGGUACGACGGGCAUGUCGU	............(((((((((......)))))))))....	-14.2	6
group-II-D1D4-3	228767	228945	+	228952	33	2.53846	7	CGAGAGUAAUUGAAUUCGGACUAAGGUUUGUGUGAAAAAG	AUAAAUCUUUCUAGAGUCUA	..............((((.((........)).))))....	-4.5	1
group-II-D1D4-1	229085	229164	+	229209	36	2.14286	45	UACUCAAACAGUCUGGGGAGAGACUGUUUGAGGUCUGUCG	CUAGAAAGAGAAAACGACAG	..((((((((((((......))))))))))))........	-19.2	3
ccnB	230778	230875	+	230875	152	152	0	AAUAAUCUCCCUUAACUCCACCGAAUCAGGUGGAGUUUUU	UAGCUCUAUUUCAGGAUUUU	.............(((((((((......)))))))))...	-15.4	5
F9	231310	231359	+	231370	336	21	11	ACCCCAAGCUCACGACCAAAUAAGCUUGAGGUCUUUUUUG	ACACUAUUUGUCCUUGUUUA	(((.((((((............)))))).)))........	-8.9	6
SP_0258	231373	231465	-	231324	114	10.8571	49	AGACCUCAAGCUUAUUUGGUCGUGAGCUUGGGGUCUUUUC	UAGCCUAUGAUAUAGAACUA	(((((((((((((((......)))))))))))))))....	-22.2	5
SP_0259	231600	232598	+	232649	28	2.22517	51	UUAGAGGCUUUUAGAGAAAGUCCAGAUAUGAUGGCCAUUC	UGACGAUCAUCCGAGACCUU	.....((((.(((...............))).))))....	-5.3	2
SP_0260	232579	233151	+	233279	1561	78.8384	128	CCUAUAAAAAUAAAGUCGCCCAAUCAGGCGGCUUAUUUUU	UUGAAAAAUGGGCUUGGUGC	.....((((((((.((((((......))))))))))))))	-13.6	7
ccnD	233186	233279	+	233279	1561	93.66	0	CCUAUAAAAAUAAAGUCGCCCAAUCAGGCGGCUUAUUUUU	UUGAAAAAUGGGCUUGGUGC	.....((((((((.((((((......))))))))))))))	-13.6	7
SP_0261	233382	234140	+	234195	426	23.9174	55	CAGGAUUUACAGAAAAGAACCUUGUUUGCAGGGAUUGCCC	UGGCUAUUUUCCUACCAAUU	...................(((((....))))).......	-4.7	2
SP_0262	234149	234952	+	235073	349	13.847	121	CGGUCACUUCUACUUUGCCAAGAAAUCAGGGAUUUUAGUA	CGUGAAUUUGCCAUCGGUAU	.(((............)))..((((((...))))))....	-2.3	5
SP_0263	234974	236233	+	236247	67	4.20698	14	GACAUUAUGCGACUCUUUUUUAGAUAAUCGAGGAAUAUUA	UGAAACAAAGUAAAAUGCCU	.........(((.(((.....)))...)))..........	-2.1	3
SP_0264	236246	238099	+	238159	17301	215.841	60	AACAAGGAAAAAAUGUAACUAGUUUUUACCUUGUUUUUUC	UGUAUAAUGGGAGAAAUGAG	(((((((.((((((.......)))))).))))))).....	-9.8	6
SP_0265	238198	239577	+	239618	438	39.8182	41	AAAGGACUCUGACUGAUUAUCCCAAUCGGUCAGAGUUUUU	AUGCUUACAGGAGCUUAAUU	.(((((((((((((((((.....)))))))))))))))))	-21.1	5
SP_0266	239770	241578	+	241610	12340	247.562	32	GUAGAAUAAGCUAAAAAAGUCUAGUUAUCUAGGCUUUUUC	UAAUGAGCAAAUCGGUUGCU	.............(((((((((((....))))))))))).	-11.4	5
SP_0267	241697	242746	+	242825	71	4.23179	79	UGUACAAAAAUUAAUCCCCCGAGCUAUAAUGCUUGGGGGA	UUUUUCUAUAGGAGGGCUAG	..............((((((((((......))))))))))	-20.3	2
SP_0268	242846	246688	-	242792	504	14.0979	54	AGAAAAAUCCCCCAAGCAUUAUAGCUCGGGGGAUUAAUUU	UUGUACAAUAUUUGUUGUCC	.....((((((((.(((......))).)))))))).....	-18.5	5
SP_0270	247026	247118	+	247257	485	8.67084	139	UUUCUUCACCACAAAAACGUGGUGUUGCAACUCGUGUUGG	AACAAUGACACCUAAAAAAC	...(..((((((......))))))..)((((....)))).	-12.2	3
SP_0271	247105	247518	+	247539	807	6.18255	21	CUAAACGUCCAAAAGCAUAAGGAAAGGGGAUAAAGAGAAA	UGAGUCGUAAAAAUAGAGCU	......((((.....(.....).....)))).........	-2.2	0
SP_0272	247538	248008	+	248112	2993	21.4509	104	GCAACCAAUGAGAUUCAUCUUUUUCUCCAGACUUUUAGCU	UGAGCUCAACUAAAUCAUGA	.........((((..........)))).............	-2.4	5
srn068	248144	248290	+	248378	56356	585.601	88	AAACAUUGAGAACGGGUAGGUCCUGCCUAUCCGUUUUUAU	UAAAAUCGUGUUAUAAUAGA	......(((((((((((((((...))))))))))))))).	-19.5	6
SP_0273	248433	250514	+	250560	88077	143.638	46	CCUCACUCUAGAAGGAAGUCACUUAGUGGCUUCCUUUUGU	CUUUAGAAAAUACCUCUAAA	........((((((((((((((...)))))))))))))).	-17.8	5
SP_0274	250618	255009	+	255078	3197	113.727	69	GCUAACGUAUAUCCAAUAGAUUUACAUUAGCUUUCUUUUU	UGUUAAAAUAGUCUAUGGAA	(((((.(((.(((.....))).))).))))).........	-8.5	7
SP_0275	255111	255374	+	255509	223	10.3267	135	GUUCAAGAAAAAGAACAUCCUGCCAGAAAUCGUGAUCAUU	CAUUGACGGCAUCCAAGCAU	((((........))))........................	-3.2	4
SP_0276	255367	255645	+	255667	87	5.39071	22	UCACAGUGAUUUAUUUUAAUCUAUUUUAAGGGGGUUCUCA	UGAAACUAAGAAUAUUUGCG	.......((((......))))........(((....))).	-2.1	3
SP_0277	255666	255818	+	255886	59	3.80236	68	UUACCAAAUUUUAAAGAAAAUCUAGAAAAAUAUGCGAAAU	UGUUGGUUGCGAACGGAAUU	........................................	0	2
SP_0278	255840	257081	+	257092	265	9.78582	11	CUUUUCCGUAAUGGGAAUUGGGCAAAUUAAGGAGAUAAUA	UGUUAGGAAGUAUGUUCGUU	..(((((.((((..(.......)..)))).))))).....	-5.3	2
SP_0279	257091	257321	+	257350	532	12.8318	29	CGAGGAAGUUAAUUUCCUAAAUCUGAUACUCAAUGAAAAU	CAAAGAGCAAACUAGGAAAC	..(((((......)))))......................	-4.4	2
SP_RS01365	257342	257571	+	257572	11268	164.898	1	AACGAAAAGGAGGUUGGUCAUUGUACUAGCCUCCUUUUGA	UAUGAUAUAAUAGUUCUAUG	....((((((((((((((......))))))))))))))..	-19.6	4
SP_0280	257589	258311	+	258461	110	6.64835	150	AGUAUAAAUUCGAAAAAGGUGAGGGACAAUGUCCUCGCCU	UUUAUGUUUUUUAGUUGCUU	................(((((((((......)))))))))	-13.3	2
SP_0281	258529	259863	+	259910	15798	164.182	47	AGAAAAAAGGAAUCAGAUUUUAGAACCUGGUUCCUUUUUA	GUUGCUUGAUUACAUGAUGU	...(((((((((((((..........))))))))))))).	-14.9	5
SP_0282	259919	260830	-	259869	11259	120.359	50	AAAAAGGAACCAGGUUCUAAAAUCUGAUUCCUUUUUUCUA	UGCUUUUAUUCAGCCAAGGC	(((((((((.((((((....)))))).)))))))))....	-13.3	6
SP_0283	260854	261657	-	260752	1241	23.1605	102	AAAGUUUGGUGGCGUUCAACCUUCUUACAAGGGUCUUGGA	ACUUUGAACGGAUGCAAAAC	.(((...(((........)))..))).((((...))))..	-4.3	3
SP_0284	261685	262674	-	261658	195	8.09932	27	CAAUGUCAAAUAAGCCAUUAUUUAUGAAAGGAUUUUAAAC	AUGUCUAUUAUUUCUAUGGU	.......((((((....)))))).................	-1	4
SP_0285	262907	263926	-	262858	16799	134.5	49	AACCUAUUUUAAAAGUUGGAAGCUUCUUCCAACUUUUUUA	UAUUAAAUUUUAAAUAAGAA	..........((((((((((((...))))))))))))...	-13.3	6
SP_RS11645	264119	264249	-	264118	5137	128.012	1	AUUUUCGAAGAGUAUGACCAGCUUGCAAGCUGGUCUUUGU	GCUCUUUUCACAGUCUCAUC	...............((((((((....)))))))).....	-13.4	5
SP_0286	264266	265078	-	264118	5137	168.503	148	AUUUUCGAAGAGUAUGACCAGCUUGCAAGCUGGUCUUUGU	GCUCUUUUCACAGUCUCAUC	...............((((((((....)))))))).....	-13.4	5
SP_0287	265268	266686	+	266718	14195	448.145	32	GCCUUAUAAUAGAAUGACCCAGGGGGAUUUCCCCCCUUUU	UUAAUACAAAGGAGAUAGGU	....................((((((.....))))))...	-11.2	4
SP_0288	266736	267446	+	267519	962	61.8153	73	CAGGGAAAGAUGAAUGCAAUCGUGUCCAUCUUUUUCUUUU	UAUGGUAAAAUAGAAAAAUA	.(((((((((((.((((....)))).)))))))))))...	-13.3	7
SP_0289	267571	268515	+	268549	41	2.42435	34	UAAAUAAGAUGAAAGAAAUUGAAAACAAUCAGUGGAUUGC	UAACUACCGGACGGAUCAAC	.........................(((((....))))).	-3.4	3
SP_0290	268517	269839	+	269946	94	4.465	107	ACCUGCUCGUGUAGCCCGUAUGUAUCAAGAGAUUUUUUCA	GGUCUUGGUCAAACAGCAGA	.....(((.((..((......))..)).))).........	-3.2	6
SP_0291	269820	270374	+	270403	1090	31.5289	29	AUGGGGCUAUAAAAAGAAUCCGCUUCAAGCGGAUUUUUCU	AGAAAGGAAUCAUUAUGGAU	.............(((((((((((...)))))))))))..	-12.7	6
SP_0292	270417	271229	+	271278	1127	34.1515	49	UAGUUUUCAGUUACUUGCAACUGAAGGCUAGAGUUUUUAU	ACUCUUCGAAAAUCUCUUCA	((((((((((((......))))))))))))..........	-12.8	6
SP_0293	271379	271696	-	271333	211	6.71173	46	AUGAAAAUCAAAGAGCAAACUAGGAAGCUAGCCGCAAGCU	GUACUUGAGUACGGUAAGGC	..............((...((((....))))..)).....	-4.4	1
L13_leader	271945	272028	+	272177	227	9.21266	149	GUCUUUCUGCAGUAGUUGCUAGCGUACUUCGCGGAAAAAA	CAAACCAACAUUUACACCAC	...((((((((((((((...))).))))..)))))))...	-9.4	0
SP_0294	272052	272498	+	272609	761	7.44765	111	GCGUUCGCCUUGUUCCAGGAACUGGUAAAAUCACUGUUAA	CAAAAAAGAUGUUGAAGAGU	......(((..((((...)))).)))..............	-4.7	3
SP_0295	272517	272909	+	272961	100723	262.204	52	UACUAUACUUAUACAGAGCACCUUUCGGGGUGUUCUUUUU	UUAUACUUUCUUACUAAAUU	..............(((((((((....)))))))))....	-12	7
srn081	273681	273799	-	273622	2969	51.5557	59	GUAUCAGGUAUUGAACAACCUUGAUAAUAUGCGUUUUAUU	AUGGAAAUAUUUGCUUCAUU	.((((((((........))).)))))..............	-6	6
SP_0298	273953	275161	-	273897	59	3.67751	56	CAGCUAAUUAGAUUUGCAACAGUCUGUUAUCAAUGAUUCU	ACCCAAAUCCUAACAAGAUA	........((((((......))))))..............	-2.3	4
SP_RS11655	275308	276154	+	276278	88	8.8	124	AUAAAAAACAAGUUUAGAUCCUCAUCUAAACUUGUUUUUU	UAAAAUUGAAGGAUGAUUUU	..(((((((((((((((((....)))))))))))))))))	-16.9	7
SP_0301	276142	276234	+	276278	88	8.8	44	AUAAAAAACAAGUUUAGAUCCUCAUCUAAACUUGUUUUUU	UAAAAUUGAAGGAUGAUUUU	..(((((((((((((((((....)))))))))))))))))	-16.9	7
SP_0303	276838	278274	+	278310	59	59	36	AAUAGUAUAAACAAACUGAGAUUAUUCUCAGUUUGUUUAG	CAUAUUGAGGUGACAUAUGA	.......((((((((((((((....)))))))))))))).	-18.4	5
SP_0308	281116	281430	+	281462	12	12	32	GUUAACUAAAUAUGUGUUGUUAUAUAAGGAGGAAAUGAUA	UGGAUAAAAAAGAACGACAA	(((..((...((((((....))))))...))..)))....	-3.1	2
SP_0309	281461	281967	+	282048	15	15	81	AAAGUAAAAAUUAUUAUGUUUUAUUAAGGAGGUCUAUUUA	UGGAUCAACAAAACGGGUUG	..(((((((.........)))))))...............	-0.4	5
SP_0310	282047	283393	+	283497	271	271	104	CAGUGAAGAGGUCUUUUUAAGAUAUUCUUCUCUGCUUUUU	CAUAUUUUUUCGCUAUGUAG	(((.(((((.(((((...)))))..))))).)))......	-10.8	6
SP_0311	283772	283948	+	284029	112	4.19928	81	GGAUAAUUUAUAUACCGAUCCGGGUUCUUCAGUUCUAAGA	AAUAAGCAGGAAGGAAAAAA	(((..........(((......)))........)))....	-2.7	3
SP_RS11670	283948	284153	+	284168	147	5.96247	15	AAGUAGUUUGUUUCACAACUGCAUAAGCUUAGAAAAGUUG	AAAAGUGAUAACUCUUUAAU	..((((((........))))))...(((((....))))).	-6.4	2
trn0156	284018	284090	+	284168	147	6.30398	78	AAGUAGUUUGUUUCACAACUGCAUAAGCUUAGAAAAGUUG	AAAAGUGAUAACUCUUUAAU	..((((((........))))))...(((((....))))).	-6.4	2
SpF10_sRNA	284261	284317	+	284320	3680	58.5455	3	AGAAUAAUGAAAAACGCAUCAAAAAUGGUGCGUUCUGUUU	UUAUGCUACCAUAAAAGGAG	............(((((((((....)))))))))......	-10.9	6
SP_0312	284349	286562	+	286707	3059	103.345	145	ACUUUACAACACUUCAUGUUUCAUAUCAUGGGGUGUUUUU	CUAUUUAAGUCAAAGCCCAU	.......(((((((((((........)))))))))))...	-13	6
SpF11_sRNA	286614	286708	+	286709	1067	39.8134	1	UUUACAACACUUCAUGUUUCAUAUCAUGGGGUGUUUUUCU	AUUUAAGUCAAAGCCCAUCA	.....(((((((((((........))))))))))).....	-13	6
SP_0313	286784	287260	-	286728	1596	54.4091	56	GAUUAGGUUUCCUUUAACCUGAUGAAUAGUGAGAUUUUUU	GAUGGGCUUUGACUUAAAUA	.((((((((......)))))))).................	-8.1	6
SP_0314	287450	290683	+	290767	305	305	84	GAAAAAAUCCGAAGAAGGCCAAAUAUCUUCGGAUUUUUCU	UUUAAAAAAGGAUAAGUUGA	..(((((((((((((..........)))))))))))))..	-14.6	6
SP_0317	291831	292460	-	291745	143	143	86	CCCAAAUCAUCAGCCAGCGCCUAAAGACGCUGGCUUUCAC	GUUGUUCAAGCCUUAUUGCU	...........((((((((........)))))))).....	-14.5	3
SP_0318	292470	293471	-	292333	11	11	137	CCUCGAUUGCUUGUAUCAAGGGCGGUAUCAAAGCUAUUGA	AAUCGCCUAUACCAAUCAGU	..(((((.(((((((((......)))))..)))).)))))	-8.9	3
SP_0326	298985	299278	+	299288	54	54	10	GGGAAAGACAAAAGAACUGCUUUUUAAGUAGUUCUUUUUC	UGGUAAUAGAUAAUGAAAGA	.........(((((((((((((...)))))))))))))..	-13.1	6
SP_0327	299300	300889	+	300962	121	121	73	UCCAGAAUCCUUGCCUUAGCUUAGAUCCUGGAUGGUUUCU	UUUUUCACCCAAUGGGUGUU	(((((.(((...((....))...))).)))))........	-9.7	5
SP_0330	302903	303970	+	304048	633	13.5321	78	AAAAUAAUCCCACCUAGAACAAGCUAGGUGGGAUUAUUUG	CCUAUGAAAUGAGAAAUUAU	.((((((((((((((((......)))))))))))))))).	-24.8	5
SP_2241	304080	304415	-	304008	108	6.11321	72	CAAAUAAUCCCACCUAGCUUGUUCUAGGUGGGAUUAUUUU	AUUUCUUAACAGAGAUUGCA	.((((((((((((((((......)))))))))))))))).	-23.5	6
SP_0333	305237	305431	-	305220	41	2.22684	17	UCUUUUGGGAGGAAGAUUUUUAAAAAAGGAGCAAACUCAU	GAAAAAAGAAACCUUCACUG	((((((....))))))............(((....)))..	-4	2
SP_0334	305597	306547	+	306621	154	6.33657	74	CAGGUCAAAUACUACAGAUGCAACUUAAACGGUUUUCGCG	UGUGGAAAAAGCUUUUUACU	...................((((((.....))))...)).	-0.8	4
SP_0335	306559	306876	+	306989	141	6.61368	113	AGAGUUGGAAAAAGUCUGAGUUUAUUAUCUGUCUUUGUUU	UUGCCAUUUUUUUAGUCAAU	(((.(((((.....))))).))).................	-2.9	6
SP_0336	306880	309132	+	309246	110	4.88579	114	UUUUAUAGAAAGGCGCAAAUUACAGGCCAGCAGAUGCAUG	AGGAUGUCAAACAGCAUCAG	...........(((...........))).((....))...	-4.8	2
SP_0337	309134	310114	+	310146	4601	86.4489	32	UUGAUGUAAGAAUGGCACCCUGAUGUUUCAGGGUGUUUUU	GUGUUUAAAUACACAAUGAA	.............((((((((((....))))))))))...	-16.1	6
SP_0338	310723	312828	+	312886	129	6.91071	58	AAAAAAGAAGGAGCCAGCUGAAAAAAACUGGUUCCUUUUU	AGGUACGACAGGCAUGUCGU	....(((((((((((((.(......).)))))))))))))	-16.8	6
SP_0340	313124	313606	-	312975	4467	196.238	149	CACGAAACCAGUCCACGUUUUUCCAGGACUGGUUUUGAUA	UAGCACGUUUAAGUACCGAC	..((((((((((((...........))))))))))))...	-18.1	5
SP_0341	313701	315185	-	313665	11866	203.127	36	GUAAAGAUUUCAACCUCUCCAGCCUCGGAGAGGUUUUCUC	UCUGUCUCAGGAGCAACCUU	...........(((((((((......))))))))).....	-14.9	5
SP_0342	315338	316945	+	317029	1290	33.3234	84	AAGGGAGGACUGUAUAAAAGACAGAAAUCCUUUGUUUUUU	AUAACCAAAGUUUAUAAACU	((((((...((((.......))))...)))))).......	-8.7	7
SP_RS01670	317104	317163	+	317256	706	42.1493	93	CUCAUGAGCCACUUUCUUCCUCCUCAUGAGGUCAGUUUUA	CUUUCUGCUGUUCCAGUAUC	((((((((..............))))))))..........	-9.4	4
SP_0346	320077	321522	+	321558	2941	56.2087	36	GAUGAAAUGAUAGACAUCCAUUCGCAUAUCGUUUUUGAUG	UAGAUGACGGUCCCAAGUCA	...(((((((((..(........)..))))))))).....	-6.1	5
SP_0347	321524	322255	+	322340	451	8.60268	85	CAAUUAGUUAAAAGCUUGUGGAAACGCAAGCUAAUGAUUU	UAAUAGUGGCACUUGUGACA	.....(((((..((((((((....))))))))..))))).	-12.9	4
SP_0348	322264	322956	+	323093	1230	18.85	137	UUGAGCGGAGAUAAACUAAAAGUAAUUUCCGUUACUUCUG	UUAACCCUGGGGAAGGAAAA	...(((((((((..(((...))).))))))))).......	-9.5	4
SP_0349	322966	323649	+	323654	1608	30.8106	5	GUUUACGGUUCCUAUGGAAAUUAUGGUAAAAAAUAAAAUG	AAUAUAGUAUGGAAGGGGAC	.(((((.(((((...)))....)).)))))..........	-4.1	2
SP_0350	324029	324625	+	324652	284	5.18139	27	AGAAAGAAAGUUAAAUUGGACAAUGAAAAUACUAUUUGUU	UGCCAACAUUAUAAGCCAGA	..................(((((............)))))	-0.9	6
SP_0351	324634	325863	+	325905	1396	20.5987	42	UUAAUGAGAGUACUGUUUAUACUAUCUGAUAAUAUAUAUC	UAACUCCUUACUUCAAUUUU	.....((.((((.......)))).))..............	-1.4	4
SP_0352	325868	326944	+	327049	468	7.48716	105	UCUCACAUUGAUAGAAAAAAAAUUCAAUUUGAUUUUAUUG	UGCCUGGAAAAGAACAAGGA	..(((.(((((............))))).)))........	-3.9	6
SP_0353	326937	328055	+	328162	844	10.1731	107	UUGUUCUGGACUCUCGAUAAUUGGAAUAAUGGUUUUCUUA	UAUCUAAUUAUGUUCCGUCU	(((((((...............)))))))...........	-2.2	6
SP_0354	328056	329456	+	329576	67	3.28758	120	CUAUGAUUUAUUAGAAUCUAAAGGAUAUGAAGUUUCUUUU	UAUAAUCCAUCAGAUUUCUU	....(((((....))))).((((((........)))))).	-4.2	7
SP_0355	329471	330538	+	330551	105	3.90563	13	UUUGGAAGGACUAGUUCGUGAAAGUUGAUAGAAUUUCAUU	UAUAAAAAAUACAAGUUCUC	.................((((((..........)))))).	-2.5	5
SP_RS01740	330528	331769	+	331868	243	6.29704	99	CCUUUGGUCAAAGAGUUAAGAACACGUAAGAAUAUUGAAA	CAUUAGUUUGCGUUACGGGC	.((((......)))).........................	-1.1	3
SP_0357	331774	332871	+	332928	269	5.75563	57	CAGGAAAAACUCUCCUAAUUACAGGAGGGACAGGUUCAUU	UGGGAAUGCGGUUCUCAAGC	..(((....(((((((......))))))).....)))...	-9.8	4
SP_0358	332875	333930	+	333957	252	5.38904	27	ACGAAGAGAUGUAAAAUCUUUUAAGAUACAUUAAAAUUAU	CAAGGAUAUAUAAUGUAUCA	...(((((((.....)))))))..................	-4.8	3
SP_0359	334030	335259	+	335379	395	11.3662	120	GUCCAGAGAUUAUACGUCUAAGUAGUGUUAUCACUAAAUG	UCGAAAGUAUUUUGAUGUUA	......((((.....))))...(((((....)))))....	-4.9	2
SP_0360	335260	336444	+	336483	461	12.5126	39	GAAUUGUAUAUUUUUAAUAAAUCAAAACGAGAUGAUUAAU	UCUUAGUAGAACAAGAGUAA	...................(((((........)))))...	-1.8	4
SP_RS01780	338405	338728	-	338255	24	24	150	AGAAAGUCGUGAUUUCUAUUGAAAUGAGGACUUUCUUUUU	AUACUCAUCUGCUUUCAAAA	((((((((.(.(((((....))))).).))))))))....	-16.5	7
SP_0366	339099	341081	+	341140	10268	172.521	59	AAGGAUUUAGUAUUUCCCUUGAAUGCUGAAUCCUUUUUUA	CAUUUGUAAAGAAAGAUUCU	(((((((((((((((.....))))))))))))))).....	-15.8	6
SP_0368	341383	346686	+	346786	19	19	100	UUAUAGUACAGAAAAAGCCUGAGAAGAUGUCUUCUCAGGC	UUUUGUUAAGCACAUAAAUA	................((((((((((....))))))))))	-16.9	2
His_leader	346753	346858	-	346753	166	8.44068	0	AACAAAAGCCUGAGAAGACAUCUUCUCAGGCUUUUUCUGU	ACUAUAAACCUCAUUGGAAA	...((((((((((((((....)))))))))))))).....	-21.6	6
SP_0369	346853	349012	-	346818	128942	170.976	35	CAUAACAUUUAUCACCCAGAUUUUUCUGGGUGAUUUUGUC	AUAGCACUAUUGUAUUUAUG	....(((...((((((((((....))))))))))..))).	-17.7	5
SP_0370	349009	349605	-	348879	550	16.7962	130	UUUUCUACUACGUUAGCAAGGCUCCUAGCCUAUCCGAGAG	UAAACUAGUUGCAACAACUU	..................(((((...))))).........	-5.5	1
SP_0371	349671	350198	+	350288	167	10.6032	90	AAGCGAGAAUGGAGAGAGACAUGGCAAGUAUUAUUUUUUC	AGCGAAAGAUAUUUUUGAAC	..((....(((........))).....))...........	-1.5	6
SP_0372	350256	350597	+	350612	190	8.29306	15	AAAUUUUAGAUAACUCAGAUUUUUAAGUAGUUAUUUGAGA	UGUGCAAUUUUUGGAUAAUC	...(((((((((((((..........).))))))))))))	-7.1	3
RNaseP_bact_b	350618	350998	+	351011	372916	74.4719	13	CUUCUGGAACAAAACAUGGCUUAUAGAAAAUUGCAUAUAG	GUUGGGGCUGAGAAAUUUUC	.(((((...((.....)).....)))))............	-1.4	2
srn098	350624	351014	+	351043	220198	359.291	29	GCAUAUAGGUUGGGGCUGAGAAAUUUUCUCAACCUCAUUU	UUUAAAGUGGACAUAUAGAA	..........(((((.((((((...)))))).)))))...	-12.1	4
SP_0373	351083	352240	+	352254	159	9.07534	14	CGUGUCAAACGGCAAGAGGUAAAAUAGAAAGGGAUACUCA	UGAGUAAAAAAAGACGAAAU	..((((....)))).(((..................))).	-3.7	2
SP_0374	352253	353647	+	353694	69	3.3306	47	GUUACAAAAUUCUUUCUUUUCAAAAGUAAAAAUGAUAAAA	UAAAACAAAUGAAACAAGAG	........................................	0	2
SP_0375	353723	355147	+	355290	712	18.4635	143	UGGUAGAGGAGGGGCAAAAAGCCCUCUCCAUGGCUCUUCA	GACAGACUAUGAUUUGAUGU	.(((...((((((((.....)))).))))...))).....	-15.8	3
SP_0376	355159	355848	+	355881	31733	405.465	33	AAGAAUAGAAAAGCAGUUGCAGUUGUGUAACUGCUUUUUU	GAGGAGUUUUUAUAUAUUGA	......(((((((((((((((....)))))))))))))))	-18.2	6
SP_0377	355947	356969	+	356988	51	3.06	19	CUCAUCUGGUGAGUGGAUUUAAUAUUGGAGGGUAUAUAGA	UGAAAAUUUUGAAAAAAACU	(((((...)))))........(((((....))))).....	-3	3
SP_0378	356987	357985	+	358103	199	7.23636	118	GGGAGAUUAAAAGCAUGUGAAAUCUACACAUGCUUUUUCG	UUAGUUAUGAGUGUUGAACU	........(((((((((((.......)))))))))))...	-12.9	5
SP_0379	358103	359335	-	358068	314	314	35	ACUAACGAAAAAGCAUGUGUAGAUUUCACAUGCUUUUAAU	CUCCCCAAUCGUCAGGUCAA	........(((((((((((.......)))))))))))...	-13.9	5
SP_RS01865	360865	361196	+	361236	117	117	40	AUGAAAGAAGCGAUUGUGAAUGGAAACAAUCGCUUUUUUU	GUGAAAAUAUAAUAAAAUAG	..(((((((((((((((........)))))))))))))))	-18.2	7
SP_0381	361318	362196	+	362304	33	2.51695	108	GCCUGCUACUAGCAGUAUUUCUCUAACUUUGGAAAAUAUG	UAUACAGAGACGACCUUGUC	..(((((...)))))(((((.((((....)))))))))..	-6.6	2
SP_0383	363118	364125	+	364255	43	2.71293	130	ACAAUCUGGAUGAAAUCGAUCUUUCGACAGAGUUUGCUGG	UCGAAAGUGGGACUUUCCUU	....((((..(((((......))))).)))).........	-5.5	4
SP_0384	364109	365119	+	365136	3089	16.504	17	AAGGAUCAGAUGAAAAAGGCGUAACCAGCGCCUUUUUUCC	AUCCUCAGACUGAGGUGACU	...........(((((((((((.....)))))))))))..	-13.4	6
SP_0385	365196	365894	+	365940	34	2.51007	46	CAAGCCUAUGUCAUUAUUGCUCUCACCUCCUUCCUAUUUG	UCUUUUUUUUCUCCCACAGC	..(((..(((....))).)))...................	-1	4
SP_0386	365891	366886	+	366901	84	7.63636	15	GUAUUCCCCUGUUAGAUAAGGAAUGAUAAAGGAGUAAAGA	UGAAAAUUUUACUAGUAGAU	.((((((..(((((.........)))))..))))))....	-7	1
SP_0387	366900	367532	+	367611	49	3.53608	79	AAAAGACUCUAAAAAAGCAAGGUCCAUGGAAGCCUAUAUG	CGCCAUCAAUUUUCUUUUCU	...................((((........)))).....	-3.1	3
SP_RS01910	367756	368010	+	368041	37	2.57219	31	AGCUUCCUAGUUUGCUCUUUGAUUUUCAUUGAGUAUAAAA	UGGAGCCUAUCAGAUAAUAU	.(((....))).(((((..(((...)))..))))).....	-6.9	2
SP_RS11710	368029	368301	+	368347	24	2.01399	46	UUGAAAAGCGCAGUCAUUAAUUGAAAAGUUUACCUGUUUA	UGUGAUAAUGGAGGGUAUUU	.....((((....(((.....)))...)))).........	-2.9	4
SP_0389	368451	368690	+	368796	79	5.75709	106	GGAGUAGCCGAUGGAAUGAAUGUAGAAGGGAGGGGAAGUG	CGAAUUUUAUUAAAGAUAAU	((.....))...............................	-0.6	1
SP_0390	368771	369592	+	369612	63	4.11887	20	UCAUCUGGUGAGUGGAUUUAAUGUUGGAGGAUAUAUAAAA	UGAAGCUUUUGAAAAAAAUG	..(((((.....)))))...(((((....)))))......	-1.6	2
SP_0391	369611	370633	+	370692	61	3.77579	59	UGUGAUGGAUACUUAACUUUGUAUAAUAGGUGGAUAAAAG	UCUUCACAAUCAAAAAACGC	........((((........))))................	-1.8	1
SP_0394	372310	374079	+	374168	256	9.66038	89	AAUUAUUGAAGGCUUUCCUACAUGUAGGGAAGCUUUCAAU	GCAAGAUAUGACUGAAAUCU	....((((((((((((((((....))))))))))))))))	-20.2	4
SP_0396	376060	376497	+	376506	76	76	9	AAGUAUUGCGCUUAUUUGAUGCUGUUGAAUAAUUGAAUUU	AGUCAUUUGUCAUCUAGUAU	.(((((((........))))))).................	-3	5
SP_0400	378481	379764	+	379807	54873	178.048	43	UUAAUAAACAGAAAACCCACCUGAAUUGGUGGGUUUUCUG	AUGCACUAUUUUCCAAAAAU	........(((((((((((((......)))))))))))))	-22.9	5
SP_0401	379812	382178	-	379773	177	2.65766	39	GUGCAUCAGAAAACCCACCAAUUCAGGUGGGUUUUCUGUU	UAUUAAGAUUAUUUUACUGU	......(((((((((((((......)))))))))))))..	-22.5	6
SP_RS11715	382223	382377	-	382137	79	4.44254	86	GGAAGUUUAUUUUUCAGGAACUAUUGAACGGAUUAUUUUU	GAAAAUCCCAGCAAUUUUUA	.(((((..(((((((((......))))).)))).))))).	-2.7	7
SP_0402	382457	383071	-	382413	5412	124.217	44	CCUAAGAGGCAGAGAAUCACCAAUCUCAGCCUCUUCUUCU	AUCGUGAGAAGUGAUUGUUU	...(((((((.((((........)))).))))))).....	-15	5
SP_0403	383075	383956	-	383070	150	9.07643	5	ACACUGAAAAAGCGAAAAAACGCUUAGAAAGGUAAGUUAU	GAAUUCAUUUAAAAAUUUCU	((.((....(((((......)))))....)))).......	-5.8	4
SP_0404	384043	384345	+	384406	237	8.90012	61	GUCUUGGUUUGGGGAUUUUAUAUCGGCUAUCGGAGAGGCC	UGCUCUUACAGGUUUAUUAC	(((((....(((.(((.....)))..))).....))))).	-6.1	0
SP_0405	384342	384890	+	384920	6464	135.256	30	UAAUCGGAUAAAAAGGGCAGGAGUUUUCCUAGCCCUUUGU	UUACAGAUUUGACUCGAAUC	...........(((((((((((....)))).)))))))..	-15.5	4
SP_0406	384994	387330	+	387339	137	6.43718	9	GUGGUGCGACUAUUGUCACUUUUAAAGGAUAGCAGUAUUC	UGGACUUUAUAAAGUAAAAA	..(((((..(((((.(.........).)))))..))))).	-6.1	3
Glycine	387494	387582	+	387645	4724	253.338	63	AAGCAUUCCAGAGUACAUGUAUCUUGCAUGUGCUCUUUCU	UUUGGGGUUGAAACGAUAGG	.........((((((((((((...))))))))))))....	-15.3	5
SP_0408	387673	388995	+	389023	2585	70.5583	28	UUUUGACAAAUAAUGGAAUCACACAGCUCGUGUGAUUUUU	UUGCCUAUAAAUAAUUUUUA	..............((((((((((.....)))))))))).	-10.6	6
SP_0409	389213	389761	+	389809	3957	51.2786	48	CUGAGUAAAAUGAAGUCUGAAAUAAGCGGACUUCGUUUUU	UUAAAUCCUCAUUUAAGCGC	......(((((((((((((.......))))))))))))).	-14.3	6
SP_0410	389871	390770	+	390793	1359	43.8387	23	UUACGAAAAAAGGUCUAGCUAGAAAUAGCUAAACCUUAUU	UUUUAUGGUUUGAUGACUUC	.........(((((.((((((....)))))).)))))...	-12.9	4
SP_0411	390795	392069	-	390757	12564	364.702	38	AAAAAAUAAGGUUUAGCUAUUUCUAGCUAGACCUUUUUUC	GUAACCAAAUCAGAUAAGCA	...(((.((((((((((((....)))))))))))).))).	-15.8	6
trn0218	392084	392155	-	392084	758	38.5317	0	UGGCCCUGCCACUCCAACGUUUUGUCAGGGUGCUUUUUUC	AUAAAGGAGUUCUUAUGUUA	..((((((.((...........)).)))))).........	-8.8	6
T-box	392105	392273	-	392086	4043	177.714	19	CGUGGCCCUGCCACUCCAACGUUUUGUCAGGGUGCUUUUU	UCAUAAAGGAGUUCUUAUGU	....((((((.((...........)).)))))).......	-8.8	6
SP_0413	392656	394020	-	392620	743	38.4873	36	CUAAGCAUGGCCCAAUCACUUAACAAAACAGUACUCCUCA	GUACGACAGGCACUUCCUAC	........................................	0	2
SP_0415	394345	395130	+	395255	172	6.13233	125	AUAUGAAAAAUGGACUACCAACGAAUCAAUGAAUAUUUAA	CAUCUAUAUUUAACAAUGUC	...(((....(((....))).....)))............	-1.3	4
SP_0416	395224	395658	+	395768	845	7.82459	110	CUCAGAUUAUGGAUACCAAUGAUGAGUGGAUUUCAAGUCG	AACGGGAAUACGACAAAGGC	....((((.((((..(((........)))..)))))))).	-6.4	2
SP_0417	395658	396632	+	396693	638	10.2916	61	UUGUUAUAAAAAAACUAUUUAUUUUAAAGGAGUCCUAUCA	UGGCAGUAUUUGAAAAAGUA	...........................(((...)))....	-0.5	3
S15	396640	396748	+	396873	412	8.08671	125	GCUUUUGAUAUCCAAAUCGAAGCAGAAAAUGACUUGAAAA	CAGUUGGUGACUUGGUUGCU	(((((.(((......)))))))).................	-5.6	2
SP_0418	396692	396916	+	396963	151055	159.037	47	UAUUAGUAGAAGGAGUAGGGAGAAACCCACUCCCUCUUGU	UUAGGUAAUAGUUUGACUGU	.......(((.(((((.(((.....)))))))).)))...	-13.6	4
SP_0419	397035	398009	+	398136	164	6.74167	127	CGAUUGAUCGAGCGAGCCAGGUGCUCGGUUAUGAUUUGCG	UUAUCUCAUCGAUACGGAAG	....((((((((((.......)))))))))).........	-11.5	3
SP_0420	398002	398922	+	398959	205	6.77686	37	AUAGACUAAAAUAAGUAGAAGUUUUGAAAGGAAAAAAAUG	AAACUAGAACAUAAAAAUAU	......((((((........))))))..............	-0.6	1
SP_0421	398956	399687	+	399712	338	5.87717	25	UGGCUUAAGUAUGUAGCGAAAGCUAGAGGUGAAAAGAAUG	AAACUAAAUCGAGUAGUGGU	((((((..((.....))..))))))...............	-6.1	1
SP_0422	399709	400944	+	401013	145	5.15772	69	GAUGACUCAAUUUGACCAGUCAAGUUUGAGAGAAUUUUCU	UAUAAAAAUGGGACGGAUGA	.....((((((((((....))))).)))))..........	-6.7	5
SP_0423	400947	401432	+	401441	186	6.07199	9	AGUUUGGUAAAGGAUUGGUACGUAUCAAAUGAUCGAUAUU	CAAGGAAUCAAAGAAGCUCU	.((((((((..(........).))))))))..........	-4.6	4
SP_0424	401429	401851	+	401864	209	8.07331	13	UACCCUUACUUUUGCAAUUGGGAACUAAGGAGGUUCUCCA	UGUUUCGAAAAAUUUUAAUU	..................((((((((.....))))).)))	-7	3
SP_0425	401863	403230	+	403278	165	5.5703	48	UUAAGAGUUUAAACCGAAAAGGGGAAUCAAUGGCUCUAUU	UAGUAAAAAAGAUAAGUAUA	...((((((....((......))........))))))...	-6.2	4
SP_0426	403267	404133	+	404133	916	22.7238	0	UUGCUAGCCUAGUCAGAUUGCAUGGAGGGAGUCCUAGAUG	AAUAUUGCAAAAAUAGUCAG	........((((...((((.(......).))))))))...	-5.6	2
SP_0427	404130	404897	+	404933	50242	499.203	36	ACUAAGAAUGACUAAAUGAGACUAGAAAGGUCUCAUUUUU	UAUGGAAAAAUGUAAUUCAG	.............((((((((((.....))))))))))..	-11	6
SP_0428	404908	405049	+	405072	15	15	23	AUCUAUUUUAAGAAGGUACUUGCAAUGACAGGUACAAAUA	CAUUUACAGUUCUUUCAACU	...............(((((((......))))))).....	-7.6	2
SP_0430	405259	405732	+	405848	76	6.33333	116	CCAAUUAGUUUAUUAUAUUAUAGUCUGAUUGGUUUCUUUU	UUGCCCUUGUUUAUCGUUCU	((((((((.((((......)))).))))))))........	-9.4	7
SP_0431	405745	405981	+	406029	1742	108.875	48	CAAAGAAAAAAGUGUUUGAUAUCUAUCAAACACUUUUUCU	UUUUAUUGUUGGCUCUAUAA	...(((((((.(((((((((....))))))))))))))))	-14.8	6
SP_0433	407504	407926	-	407431	32321	580.791	73	GCUAAGCUCGAGAAAGGACAAAUUUCGUCCUUUCUUUUUU	GAUGUUCAAAGCGAUAAAAA	.........((((((((((.......))))))))))....	-13.2	7
SP_0434	407919	408308	-	407907	169	4.60325	12	AUUUGACGAGGACUUCCUCAAUGACUAGUCCACUAUUAGA	AUCUAGACGCCAACUCCGUA	.......((((....)))).....(((((.....))))).	-6	3
SP_0435	408330	408890	-	408238	819	14.0645	92	UUAUCGCCCCACGUGUACUUGAAAAAAUCAUUGCUAUCGC	UACUGCAAAGGUAGAGGGUG	..............(((..(((.....))).)))......	-0.8	2
SP_0436	409019	410461	-	408983	5822	69.8386	36	CUAGACAGAACAAAACCAGCCCUAAGGUUGGUUUUUUCUU	CUCUACCAACUCCCAAUAAC	......((((.((((((((((....)))))))))))))).	-14.7	7
SP_0437	410461	411927	-	410376	220	8.64701	85	ACACCAAUUCAAAAAUCUUCUCACCUACUUCUGCCCACUU	UGGAAAUGACCAAAAUGCCA	........................................	0	2
SP_0438	411927	412229	-	411881	88	3.872	46	UUAACAAUAAAACUAUUGAAGAGUUGCACAAUCUCCUUGU	CUCUAAGGAAAUUUCUGCAA	....(((((....)))))..(((.........))).....	-2.1	4
SP_0439	412442	413986	+	414039	544	27.4329	53	AAUUGGAACUAAAGUUCCAAAUUGUUGGACGCUAGUCGCU	AUUUGGCGAACUAGCUAACU	..(((((((....))))))).......(((....)))...	-10.4	3
SP_RS11740	414269	414466	+	414488	99	4.84502	22	UGAGAUUGUGAAUGUUUAGAUUGACAGUAAUAUUCUGAAA	GGUUAUCGUCUCCCCUUUGA	(.(((.(((...((((......))))...))).))).)..	-6.4	3
SP_RS11745	414541	414753	+	414881	69	4.25118	128	AUAUUAGAUCUAAUAGGAGGAAAACACAAUGGCUAAAGUA	UGUUACUUUACAGGUCGUAA	........................................	0	2
SP_0441	414869	415057	+	415094	234725	98.3267	37	UUAAUAAUAAAAGCAAAGGAGACCUUAGGGUCUUUUUUCU	UUUAUUGUGGGUAUAACAUC	...........((.((((((((((....))))))))))))	-11.2	7
SP_0442	415214	415579	+	415667	712	14.7865	88	GCAUCAACUCGCUUGAAUAAGCAAGCUGAAUAUGUCAAUU	CAUUAAACGUCUUUCCAGUU	((((....(((((((......))))).))..)))).....	-6.1	4
SP_0443	415582	417249	+	417284	46280	323.636	35	GAAUAAGAUUAAUGAAGGACUGAGAAAUCAGUUCUUUUUU	CUUUUUAGUAAAUGAAAUCG	.............((((((((((....))))))))))...	-11.5	7
SP_0445	417449	419149	+	419293	33	2.35714	144	ACAGAAGAUCCGAAUGUAUCGCGUAUCACUAUUAUUAUUG	AUGUUGCUUCUCAUGAUGAA	......(((((((.....))).).))).............	-2.5	5
SP_0446	419142	419618	+	419685	110	5.11062	67	GCCUAAAAGGCAAUAAAUAAUAGAAAAGAGAGAAAAGCUA	UGACAGUUCAAAUGGAAUAU	((((...)))).............................	-4.6	1
SP_0447	419684	420706	+	420723	44	3.14286	17	GAUGCAUUCAAAAUCUAUAACUAAUUAGAAAUAUAUAGCG	CUGGAGAUGAUUUUAUGAAA	...((........((((........))))........)).	-2.7	2
SP_0449	421287	421643	+	421676	2319	66.7056	33	AUGAAUAACUAAAAAACAGUCAUUAGUGACUGUUUUUUAU	AGAAAAAGAGGUUUUAUAUG	.........(((((((((((((....))))))))))))).	-13.7	7
SP_0450	421693	422943	+	423058	30	2.17742	115	ACUCUUCGAAAAUCUCUUCAAACCACGUUAGCUCUAUCUG	CAACCUCAAAACAGUGUUUU	........................................	0	4
SP_0451	423678	423893	+	423954	6619	46.6471	61	CUUGACCUUCAAGUAGUAGAGAUAGAGAAUCUGCCUUUUC	AUUUUGAGGACAGCAAAAAG	(((((...)))))..(((((.........)))))......	-6	4
SP_0452	424002	424742	-	423965	2018	44.3516	37	UAAAAAGAAAAGGCUGCAUCAACCGUGCAGUCUUUUUGCU	GUCCUCAAAAUGAAAAGGCA	......(((((((((((((.....)))))))))))))...	-15.6	6
SP_0453	424742	426307	-	424633	39	2.7052	109	UUUCACUCACUGUCCACAAGGGAGAGGUCAUCUCUAUCAU	CGGAAGCUCUGGAAGCGGAA	.........((.(((.....))).))..............	-5.8	4
SP_0457	429907	430752	+	430789	5824	87.9094	37	AUAAGAAAAACCUUGAAGGGGCAACUCUUCAAGGUUUUAU	ACUCUUCGAAAAUCUCUUCA	......((((((((((((((....))))))))))))))..	-19.7	5
SP_RS11760	430821	430892	-	430751	239	239	70	GUAUAAAACCUUGAAGAGUUGCCCCUUCAAGGUUUUUCUU	AUACAAAUAAACGGACAAAA	....((((((((((((........))))))))))))....	-14.7	7
SP_0458	430899	431960	-	430751	239	239	148	GUAUAAAACCUUGAAGAGUUGCCCCUUCAAGGUUUUUCUU	AUACAAAUAAACGGACAAAA	....((((((((((((........))))))))))))....	-14.7	7
SP_0459	432308	434632	+	434686	21291	119.075	54	UAAUAAAAAGGAACCCUCGGUCAAACGACUGAGGGUUUUG	UGCUUGGGAUAGUAUGAGCA	.........(((((((((((((....))))))))))))).	-20	4
SP_0461	436303	437832	-	436160	348	348	143	GCUCUCUAGUUUCUGCUAGUGAACAAAAGUGUUUUUUCUG	GCUCUAUAAUUUCUGUAGUG	..((.(((((....))))).))..................	-6.3	6
SP_0462	438348	441008	+	441014	10	10	6	GAGGAGUUCUAUUAUACACACGGAAACAUCCGUAAAGUGU	AGAAAUGAUAAUAUCUAUGU	...............(((((((((....)))))...))))	-7.5	3
SP_RS02290	443546	444457	+	444604	226	226	147	AACGGAUAUGAGGCUGGGCAGAUUGUGCCAGCCUCAUUGU	GGGUUAUUGUUUGUAAAACG	.......((((((((((.((.....))))))))))))...	-19	4
F12	444624	444663	+	444722	252	9	59	UGGAUGGUGAAUCAGAAAGAAAUGAGAUUUUCUCGUUUCU	CUUAGCAGAUAGGAUUGUCU	..(((.....)))....((((((((((...))))))))))	-10.6	5
SP_0468	446564	447415	+	447526	112	6	111	AGCUAAGCUCGAGAAAGGACAAAUUUUGUCCUUUCUUUUU	UGAUAUUCAGAGCGAUAAAA	..........((((((((((((...))))))))))))...	-14.8	7
SP_0469	447488	448764	-	447468	13	13	20	UUGUCCUUUCUCGAGCUUAGCUUUUUUUCAACCCACUACA	GUUGACAAAGAGCCGGAAAA	............((((...)))).................	-1.5	1
SP_0473	450739	451962	-	450625	22	2	114	AACAAGACGACUUCCAUAUAGGAAACCGCCUUCUCGCUAU	GUUGAGUGAUUUAUAUUAAA	...(((.((..((((.....))))..)).)))........	-5.7	3
SP_0478	457343	459022	+	459144	21	21	122	UAAGAAUCCCUCUUUCACAAUUGUAAAAAGAGGGAUUUUG	UAUUUUAUCUCUUAGACCAA	..(((((((((((((.((....))..))))))))))))).	-16.3	4
SP_0479	459148	460587	-	459105	3791	153.689	43	ACAAAAUCCCUCUUUUUACAAUUGUGAAAGAGGGAUUCUU	AUAUUAAAAAAGGGGGAACG	....((((((((((((.((....))))))))))))))...	-16.2	4
SP_0480	460591	461940	-	460548	113	6.09878	43	AUGAAUAAAAGUAUGAUUCGUUACCUCCUUUCAAAAUUAC	UUUUGAUUGAAGCUGUUCUU	.((((.....(((........))).....)))).......	-2.3	2
SP_0481	462128	462976	+	462992	98	4.75289	16	UGAAAUAAAGAAAAUAGAAGGAUAAAAUAGGAGAAUAGUA	UGGAAAUCAAAUUUACAAUU	........................................	0	2
SP_0482	462991	463539	+	463585	80	5.71429	46	AAUGAAAAUCAAAGAGCAAACUAGGAAGCUAGCCGCAGGU	UGCUCAAAACAGUGUUUUGA	...............((...((((....))))..))....	-4.4	1
srn141	463613	463725	+	463773	5118	192.295	48	AUAAAAUGAUGGGGAAGGCUGGGCAACUAGUCUUUUUCGA	UGUUUAUAGAUUAGUUAGGC	..........((((((((((((....))))))))))))..	-14.4	5
SP_0483	463905	465587	+	465707	97	5.54286	120	GGCGGCCAUGAUUAGCUAUGAUACCAGAAUGCUCUUGCUG	AUUGCCAUCUUUUCAGUCUU	...((.((((......))))...)).....((....))..	-2.9	4
SP_0484	465572	466402	+	466488	129	2.66897	86	CUGAAAGUGUUAUACUAAGAAAGUAGUUUCGCUGAUUUAC	UUCAAACCUGUUGUGAGGUA	.....((((...((((.....))))....)))).......	-5.2	4
23S-methyl	466473	466568	+	466568	2139	149.233	0	CGCUGUUUGCUGAGCUUGACUCCGGGCAGUGUGGCUAUUU	UUUUGCAAUGGUGAAAGGAA	(((((((((..(((.....)))))))))))).........	-10.7	4
SP_0486	466595	467098	+	467141	2950	109.462	43	AAUGAAAAUGAACAAAAUGCUUGCGCUUGCAAGCGUUUUU	UGUUAUGAUAAAAGAGUCUU	.............(((((((((((....))))))))))).	-13.4	5
FMN	467152	467386	+	467523	2116	24.2533	137	AAGUGAGAAUAGAUAGAGGAAUCCUUUCCAACUUCUUCUG	AUUUUAUAGAAAAUUGGAGG	.....(((..(((....((((....))))....)))))).	-5.7	5
SP_0488	467551	468114	+	468153	4705	48.1823	39	AAACAAACAUUUUUAAUGAAGGGCAGUUUUGCCCUUUUAC	UUUUCGUUAUUCUUGGCUAC	.................((((((((....))))))))...	-11.3	4
SP_0489	468104	468754	+	468873	56	3.66188	119	AAGAAGUUGCAAGAUAUUCAGAUGCUUUACCAGUCGGCAG	AAACAAUCCAAGUCGAUCCA	.......(((..(((.................))).))).	-2.1	1
SP_0490	468782	469171	+	469292	113	7.61798	121	ACCUCGUAGAUGGGGUGAAGCUUCCUUACAGUCAAGCCGA	CCUUGGAAGCCAUGUAUUCC	(((((......)))))...((((..........))))...	-6.4	0
SP_RS02420	469303	469626	+	469713	234	9.95745	87	UCGUAAAAUAAAGAGUAAAUGAUAAAAUGAGGUCAGAGUC	UGUUCGCUCUGGCGAUAGUA	...................((((........)))).....	-1.3	2
SP_0493	469739	470341	+	470438	30996	357.662	97	UUUAGAGGUCGGGGCUCCCUAGUUCUUAGGGAGCUAUUUU	UGUUUUUUCAAGAAGUUAUC	............(((((((((.....))))))))).....	-15.4	5
F13	470344	470441	+	470442	387	16.8261	1	GAGGUCGGGGCUCCCUAGUUCUUAGGGAGCUAUUUUUGUU	UUUUCAAGAAGUUAUCUUCU	........(((((((((.....))))))))).........	-15.4	7
SP_RS02430	470477	470624	+	470708	533	11.6074	84	GGUCUUGUUUUCUAUAUCCCCUCGUAGUUAACAAGACCUU	GAGCAUUUUAGAAAGAGGAA	(((((((((..((((........))))..)))))))))..	-16.6	2
srn145	470561	470657	+	470708	533	12.3146	51	GGUCUUGUUUUCUAUAUCCCCUCGUAGUUAACAAGACCUU	GAGCAUUUUAGAAAGAGGAA	(((((((((..((((........))))..)))))))))..	-16.6	2
SP_0494	470731	472338	+	472378	3598	42.8742	40	GCAAAAUCAGAACCUUUGAGAAAAAUCUCAGAGGUUUUUU	GCAUACGAUGAUAUUGCAGU	........(((((((((((((....)))))))))))))..	-16.1	6
SP_0495	472994	474340	-	472844	10	10	150	UCAUGAGGAGGAAGAAAGUGGCUCAUGAGGUCAGGGGUUU	UGUAAGUUACAUCUAGUUGA	(((((((..............)))))))............	-7.8	3
SP_0496	474605	476236	-	474564	7468	207.784	41	AACCAAGAAGCUAUCCAUCAUAAUUGGAUGGCUUUUUACU	UUUUCCUAAGCAAGACUAGG	....(((((((((((((.......)))))))))))))...	-16.7	6
SP_0499	481598	482794	+	482845	33508	221.555	51	AUAAAUCAAAGAAGAGAGGGAUGAAAGUUCCUCUUUUCUU	UUGCUUAAAAUAAAAACGCU	........((((((((((((((....))))))))))))))	-17.4	6
SP_0501	483534	483890	+	483928	2367	30.3462	38	UAGGCAACCGCAAGUAGUCAUAGAUUAAGGAGAAAACUUA	UGCCAAUCACAGCUGCAGAU	..(((.((.....)).)))......((((.......))))	-2.3	2
SP_0502	483927	485273	+	485377	48646	400.41	104	ACCUAUAACCCUUAAAAUAGCGAUUUCGGUCGCUAUUUAU	UUUUCGAAAAAUCCUCUUGA	..............((((((((((....))))))))))..	-11	5
SP_RS02475	485453	485602	+	485702	98	6.10725	100	UCGAUUUGUUUACAUCUUAUUUCAAUCUACUAUAUUAUCU	CAAUAAAUGAUGAUGGCGAC	........................................	0	5
SP_0506	487391	488188	+	488228	868	43.0413	40	AAAAAUAACAGGUGGUCAAACUGACUACCUGCUAUUUUUG	UGAUUAUGGCUCUUAUUAUG	(((((((.((((((((((...)))))))))).))))))).	-18.6	6
SP_RS11800	490047	490320	-	489924	31	2.34595	123	AAUUGGAUAAAAAUAGGUGAUACUGAAAAGGGUGAAAAGU	AUAUAAAUAAUGUUAAAGAA	....................((((......))))......	-0.8	2
SP_0509	490320	491783	-	490262	28	2.01439	58	AAGCAAGUAUUCUCCAAAGAGCGAUGGAAGGGAAAUUAGU	GCCGCAAAAUCCCAAUGACG	..((.(((.(((((((........))))..))).))).))	-3.3	3
SP_0510	491796	494129	-	491782	86	6.33684	14	AGCAAGAGCUAUUUACAGUAGCUUAAUGAAAGGAAAGUAU	GUCAAUUACAUCAUUUGUAA	.....((((((((...))))))))................	-6.8	2
SP_RS02515	494737	495247	+	495305	139	139	58	AGAUUGAUUUUUAGCACUCUUGAUAAAAGAGUGCUAAUUU	UUUGAGUUUUUGUCUUGACA	..........(((((((((((.....)))))))))))...	-15.6	4
SP_0516	496472	496996	+	497096	194	6.19149	100	ACACAAGAAAAUCUAUCUUUUUUACUCAGAGCUUAGGGCG	UGUUCGAUUCGGCAAUUCUG	..............................(((...))).	-1	2
SSRC8_2	497347	497410	+	497486	112	3.95149	76	AAAGAAAAAUAGAAAAUUAACUAACAAGGAGAAAAACACA	UGUCUAAAAUUAUCGGUAUU	........................................	0	0
trn0290	497393	497444	+	497576	217	6.99731	132	GUUCUUGAAGGAACUGAAAGCAAAAUCAUCGCAAACCCAG	AAGGAAACCGCACAACUCCA	(((((....)))))..........................	-3.4	0
SP_0517	497485	499308	+	499392	118	3.23083	84	GUUUAUAAUGAUUUUUGUAAUCAAGCUGAUAACUAUAGAA	CAUCAAAAGAUUUUAUUGAU	(.((((((......)))))).)..................	-2.2	2
SP_RS02535	499310	499665	+	499770	4668	217.916	105	UUUACUUAUUUGCAGAGGUUGCAACCCAGCCUCUGUUUUU	CGAUAAAAAGGGACGGAAUC	...........((((((((((.....))))))))))....	-14.7	6
SpF14_sRNA	499570	499689	+	499770	4668	220.189	81	UUUACUUAUUUGCAGAGGUUGCAACCCAGCCUCUGUUUUU	CGAUAAAAAGGGACGGAAUC	...........((((((((((.....))))))))))....	-14.7	6
SP_0519	500067	501203	+	501223	29	2	20	GAUGCCUUUGAUGGAGAAUAAUACUCUUCGAAAAUCUCUU	CAAACCACGUCAGCGUUGCC	(((...(((((.((((.......))))))))).)))....	-5.5	4
SP_RS11805	501203	501336	-	501153	417	28.9583	50	CAAAGGCAUCUUUAAUAUGGUCAAAGAAGCCUUUUUUCUU	UGGAUUUACUUUCAAGUCAC	.((((((.(((((.........))))).))))))......	-9.7	7
srn151	501260	501364	+	501493	436	20.984	129	GCUGUUUCAGGUGUUUUCAUUACGGCAGAAAGUCUUCGAU	UUAGUUGUGAAAUGGUGAAU	(((((....((((....)))))))))..............	-6.2	4
SSRC8_2	501377	501437	-	501345	101	6.12121	32	CACUACCGUCCGUCAUUACUUAGGAAAGUCUUAAAAAAUC	UAUAAAGUAAAAAGCAAACU	....((..(((...........)))..))...........	-2.2	1
F15	501732	501844	+	501898	1730	26.4673	54	UGUUUACGUUUUAAAAAAGAGCCGUCGGGCUCUUUUUACU	UAUCUUCAGUUCCCUGCAUU	.............((((((((((....))))))))))...	-14.2	6
SP_0520	501893	502180	-	501867	3377	90.7447	26	CUGAAGAUAAGUAAAAAGAGCCCGACGGCUCUUUUUUAAA	ACGUAAACAAGUUAUAGUGA	............((((((((((....))))))))))....	-12.4	5
SP_0521	502190	502600	-	502163	74	3.79652	27	CAAAAACGCUUAAGGAGUUGCUAUGAAAUUAUCCAACCUA	CUGCUAUUUGCAGGAGCUGC	.............(((...............)))......	-1.5	1
SP_0522	502668	503399	+	503443	235	10.8771	44	ACUUGUUUUUAAAGAGAAAGCAGGCCUUUCGUAAGGAGUG	UCUUGGUUAUCUGCGCUAUG	.(((((((((.....)))))))))((((....))))....	-9.8	1
SP_0523	503396	504445	+	504504	1279	48.3946	59	AAAAAAGAAGUUGAGUUCAGUCUGUCUCAACUUCUUUUUU	GUUACUACAGGAUAAUGGUU	(((((((((((((((..........)))))))))))))))	-16.3	7
SP_0524	504613	504942	-	504463	452	23.7895	150	AAAAAGAAGUUGAGACAGACUGAACUCAACUUCUUUUUUA	GUGUCGUAUCAGCAAUGUUA	((((((((((((((..........))))))))))))))..	-15	6
SP_0526	505561	506298	+	506313	80	4.64865	15	CUGAGGCCAUCAAUAAAUUACACUGAGCUAGGAGAAUUUA	UGAACAUUGCUUGGAUAUUG	.(((.....))).((((((...(((...)))...))))))	-1.7	3
SP_0527	506312	507652	+	507696	172	5.41732	44	AAAAUAAGACCGAGAGUACUUGUUUCUCGGUCUUAUUUUU	UUAUAGUUGUAUUGGAUGAU	((((((((((((((((.......)))))))))))))))).	-20.5	7
SP_0528	507723	507851	-	507663	409	6.71869	60	ACUAUAAAAAAAUAAGACCGAGAAACAAGUACUCUCGGUC	UUAUUUUUCAUCAUUCUGUA	...............((((((((.........))))))))	-11.5	3
SP_0529	507908	509269	-	507850	48	3.23926	58	UAACUAUUUAUUAUCUUAUCAAAAAGGAGAAUCAUAACAU	GGAUAAGAAACAAAACCUAA	.............((((.........))))..........	-0.3	2
SP_RS02600	509943	510857	-	509860	11	11	83	AGGUUAGCCUAGUUGGAGUUAGUGGUUCUGGUAAAACAAC	UUUAGCCAAAAUGAUUGUCA	(((....))).((((...((((.....)))).....))))	-2.8	0
SP_0531	511719	511916	+	511961	108	4.45728	45	AUGAUUCUUAAAUAUAGUAUUAUUAUCGCUAUUAAUUUAC	UGUCUUAUUUACUUACUUAC	........((((((((((.........)))))..))))).	-1.5	4
SP_RS11820	511921	512082	+	512137	110	5.91864	55	UAAAAAACUUAACUAUAAACUAUUAUUUACUAAUAUUUUU	UGCUUUCUGCAAGUUAAUAA	........................................	0	6
SP_0532	512383	512652	+	512697	31	2.07656	45	UAUAGUAAAAUUAUGAGGAUUCUAUUCUGAUUUAUUUUAG	UUUUUUAAAAAAGGAGUAUU	.....((((((.((.(((((...))))).))..)))))).	-4.3	5
SP_RS02625	512954	513073	+	513125	1888	88.3275	52	CUCCCCUGUAUUUGCUAGCUUAAUUUACAGGGGAGUUUCU	UUAAUAUUGUUUCGCCUGUC	((((((((((..(.........)..)))))))))).....	-17.2	4
SP_0535	513370	513534	+	513545	12	12	11	AUCAAUAAAAAGAAAGGAGAAAAGAAAUGAAAACUUUUCU	UGCUAAAAAACGGAACAUCU	.................(((((((.........)))))))	-3.9	5
SP_0536	513531	513935	+	513993	401	27.5196	58	AAGAAAAGGGUAAGUGUUUUUGCAAUACUUACCCUUUUAU	AAUAGAUUCCCUGCGAAACA	...(((((((((((((((.....)))))))))))))))..	-18.4	5
SP_RS11830	514138	514942	+	514958	24	24	16	UAUCAAUCAUGAACUAGGAUUCUAGUUUUGCAGGAAGUCU	AAUGUAAUUUUUGCAAUUCA	..((...((.(((((((....)))))))))...)).....	-6.2	2
SP_0541	515809	515958	+	516104	11	11	146	GGAUUUUAAAAGUUUUAUUAUUGGUUUAGUAGUUGGUAUA	UUUGGUCCUUAUAUGGAUGA	..............((((((......))))))........	-1.1	4
SP_RS02670	516062	516181	+	516233	1947	77.88	52	CUCCCCUGUAUUUGCUAGCUUAAUUUACAGGGGAGUUUCU	UUAAUAUUGUUUCGCCUGUC	((((((((((..(.........)..)))))))))).....	-17.2	4
SP_RS02675	516516	516695	+	516829	75	5.35714	134	AGAAUUCUAUCAACAACUAAUCGCUUAUAUAGGUGUAUUC	UCUGCUUGUUUAUCACGCUU	.....................(((((....))))).....	-2	4
SP_0544	516952	517350	+	517403	37	2.05556	53	AGAGCCUGACAAGGUGAGGUCAUAGUAGGGAGGAUUUCUA	UGAAAAAGUAUCAACUUCUA	...((((....))))((((((...........))))))..	-7.1	4
SP_0545	517402	518091	+	518134	149	10.2759	43	AAACAAAAGGCUUGCUUUUCAGCCAUAGAGGAGGUCAUCA	UGUAUAAACACUUAUUUUUC	........(((((.((((........)))).)))))....	-9	2
SP_0546	518133	518366	+	518445	117	6.47751	79	ACGUUGACGUGGUUUGAAUUUGAUUUUCGAAGAGUAUAAA	AUGGUUUGUUUUGGAAAGGC	......((....((((((.......))))))..)).....	-3	2
SP_RS11840	518344	518480	+	518518	104	7.72571	38	UGACGUGUAGGAAGUCUGUUUGUUGAGGAGGAUAAUUUUA	UGGAGUUUUUUGAUAAAUUU	.(((.........)))...(((((......))))).....	-2.3	5
SP_0547	518517	519128	+	519171	432	30.8571	43	AUUAUGAAAAGGUAAGCAGAAGACGGUGCUUACCUUUUUC	AAGCUAUAAUGAUACCCAAG	.....(((((((((((((........))))))))))))).	-17	5
SP_0549	519289	520083	+	520138	199	8.37094	55	AAAGGGGCAACAGAAUUACUAGAGGCAAAUCCCCAGUAUG	UGGUCCUCAAUCCCUUGGAA	...((((.....(..((....))..)....))))......	-5.1	2
SP_0550	520080	520715	+	520833	14287	383.029	118	UAUGAAAAGUGAGGCGGGGAAAUAUCUUCGCCUCUUGCUU	AUGAGGAGGUGGACGCAAUC	......((((((((((((((....))))))))))..))))	-16.8	5
SP_0552	520841	521320	+	521363	80	3.712	43	AAAGAAAGGAUAGCUUUUGAGGAUUCAAAAGUGAAGAAAA	CAUGAGUAAAGAAAUGCUAG	............((((((((....))))))))........	-6.7	0
SP_0553	521364	522500	+	522601	172	7.39367	101	UCUAACGAAGUGAUUGAUAAGCGUGAUUUGCUCCGCAUUG	UCAAGAACAAGGAAGGACAA	....................(((.((.....)))))....	-3.8	2
SP_0554	522522	522815	+	522815	147	5.04412	0	UGGAUCACAAAGUGAAAAGAAGAGAGUUGGGACUUGAAUA	AGCAAAAGAUAAGUAAUCUC	....((((...))))........((((....)))).....	-1.8	3
SP_0555	522808	523107	+	523252	109	4.34263	145	AUGUGAAAAGCCACUCAUCAAGUGUGGAAGAAGCUGUCGC	UGCAAAAAUUGCUGCCAGCU	..((((..(((((((.....))))........))).))))	-5.4	2
SP_0556	523124	526000	+	526142	301	6.92281	142	UGAUAAAUCAGUUCCAUCACUUUCACCACGGCGAAAGAAG	CAGAUGACUUCAAAUUGAAC	...................(((((.(....).)))))...	-4.1	0
SP_0557	526251	526601	+	526628	8362	173.126	27	UGGAUAAGAACUAAAGAAGAGGGGUUGCCCCUCUUUUUUG	GUGGAGGAAAAUAGGUUGAA	...........(((((((((((((...)))))))))))))	-16.3	6
F16	528096	528162	+	528304	63	3.34513	142	GAUUUUCAUUGAGUAUUAGAACAUACAAUGGAGGUCGUCA	UGGACAAUAUCAUCGAUGUG	(((((((((((.((......))...)))))))))))....	-10.6	2
SP_0561	528303	528536	+	528683	171	10.6525	147	GUCAGCCAUCGAGAUUUCCCUUAUGGAGCACGAGCUGAUG	AACUCGGAUUCGGGCGUCAC	((((((..(((....((((.....))))..))))))))).	-10.6	2
SP_0562	528536	529870	+	529881	47	2.76471	11	GAUACGGACUAUUUUCGUGGAUUAGAAUAAGGAGAAAAAA	UGAGUUACGAACAAGAAUUU	..((((((.....)))))).....................	-3	0
SP_0563	529880	530134	+	530212	2982	153.068	78	AGAAUGUUUAUGUUAAAUCCUUGUCAGAGCAGGGAUUUUU	UAUUGAAAGGAUUUUAUCAU	..............((((((((((....))))))))))..	-10.5	5
SP_0564	530230	530625	+	530768	88	5.2071	143	CACAAAUGUGUCAAAACUGGUUGCUAAUGGAUGAAAAAUU	GAAAUAAAAGUGUCUUUUUG	(((....)))..............................	-0.8	2
T-box	530661	530859	+	530880	5344	155.802	21	UAAACACAUUCGUCCCUGUCAUGUAGAUGGCAGGGCUUUU	CUUUUACGUCUUAGUCAAAG	...........(.(((((((((....))))))))))....	-14.9	4
SP_0565	531038	531487	+	531629	31	2.54098	142	AUCCAGCAGGUUUUCCUCCAGUCAAGAUCUUGGAAGAUGA	GAUUUAUUAUCUGGAGCACA	.((((..(((((((.........)))))))))))......	-5.8	1
SP_0566	531474	532034	+	532148	33	2.40876	114	UGCUACCCUAUUUUAUAACCAUCAAGCCAUUGAUUUUGCA	CUAGAGAUCUAUCAGGAUUA	....................(((((....)))))......	-2.2	4
SP_0567	532034	532612	+	532737	56	3.05455	125	AGGCGAUCAAAAGGCUAAGCCUUAUUCAAUCGUGAUUCCA	CCACCAAACGUAACUGGGAA	..(((((...(((((...))))).....))))).......	-8.1	3
SP_0568	532605	535256	+	535292	3776	64.9169	36	AAUGAUGUUAAAAACCUAACCCUAUCGGGUUGGGUUUUAC	AUUUGAUAAUGUUAUAAUAA	..........((((((((((((....))))))))))))..	-17.3	4
SP_0570	535552	537156	+	537181	11	11	25	AGAGGCAUUGUUCUAAUUCCUUAGAUUAGGUACUACAUAA	CAAAUUUUUUAAAUUCAAAC	..((...(((.(((((....))))).)))...))......	-3.8	2
SP_0571	537536	538339	+	538488	40	2.7027	149	GAAAAGCUAAGUUCGAGAAAGGACAAAUUUCGUCCUUUCU	UUUUUGAUGUUCAGAGCGAU	...............(((((((((.......)))))))))	-11.7	5
F18	538437	538492	+	538492	1126	1126	0	AGCUAAGUUCGAGAAAGGACAAAUUUCGUCCUUUCUUUUU	UGAUGUUCAGAGCGAUAAAA	..........((((((((((.......))))))))))...	-13.2	7
SP_0574	540142	541088	+	541144	28	28	56	AAAACAUUGUUAGAAAUCGAUUUGACUUUCCUGAUCGAUU	UGUCCUGUUAUUAUUUCAUU	..............((((((((.(......).))))))))	-6.4	3
SP_0576	543164	544003	+	544022	17	17	19	CUUAACAAAAAAUUUAGAUUAAUAGAAUAGGAGAAUACCA	UGAGUUAUAAAGAUACGGUA	.............................((......)).	-0.5	1
SP_0577	544021	545859	+	545873	34	34	14	UCUAAGGAAUUACUGGUAAUAUUAUAAUGGAGGAAAGUUA	UGACCAUUUUUCCAGAUGAU	........................................	0	2
SP_0578	545872	547287	+	547386	205	20.5	99	UAAAGAAGUUUGGAAGACAUUAAAUUCUAAACUUCUUUAU	UUUAUAGGGGAGUGUCAAUU	(((((((((((((((.........))))))))))))))).	-15.9	6
F20	547541	547749	+	547770	97	4.66845	21	UGGUUUUCUUUUUAUCUACGAGAGACUGAUGGAGGAAAUA	UGUCAACUAUUGAAGAACAA	..(((((((((((((((.....))).))).))))))))).	-6.2	1
T-box	547544	547714	+	547739	1863	72.4223	25	UGUCAACGCUCCGAGUGGAGUUUUUGGCAUGUGGUUUUCU	UUUUAUCUACGAGAGACUGA	((((((.(((((....)))))..))))))...........	-11.7	5
srn157	547597	547699	+	547739	1863	72.4223	40	UGUCAACGCUCCGAGUGGAGUUUUUGGCAUGUGGUUUUCU	UUUUAUCUACGAGAGACUGA	((((((.(((((....)))))..))))))...........	-11.7	5
SP_0579	547769	548815	+	548911	27	2.00893	96	AACCUUUCGUGAAACCUUUGCGUAUGAUAAUACGGAAGAG	CAGUUACAGGAAUACUUUGA	...............((((.(((((....)))))))))..	-6.4	0
SP_0580	548815	549324	+	549402	29	2.07143	78	AGAACUAGAGUGACAACUGUCAUUCUGGAGAACUAAAUUA	UGCUUGUAUCUUAUAAAUGG	....((((((((((....))))))))))............	-13.3	3
SP_0581	549401	551806	+	551862	4484	141.952	56	AAAUUCCCCCUCUAGUUUAUGAACAUUAGAGGGGUGAUUU	UAUAUAAAAUAAUUAAAAUG	(((((.((((((((((........)))))))))).)))))	-16.9	4
SP_0582	551874	552875	-	551821	1135	57.5725	53	AAUCACCCCUCUAAUGUUCAUAAACUAGAGGGGGAAUUUG	UAUCCUACUAUCGUUUAACG	..((.((((((((..(((....))))))))))))).....	-14.4	3
SP_RS02895	553572	553838	+	553983	1373	91.5333	145	AUUACAAAGGAUUUGAGACGUUUGCUUCAAGUCUUUUUCU	UUUGUCCGAAACAGAUAUAU	.....((((((((((((........))))))))))))...	-10	6
F57	553923	553982	+	553983	1373	1373	1	AUUACAAAGGAUUUGAGACGUUUGCUUCAAGUCUUUUUCU	UUUGUCCGAAACAGAUAUAU	.....((((((((((((........))))))))))))...	-10	6
SP_0586	556412	557278	+	557322	460	31.1864	44	AAGCAAACCAUUCUUCUCAGGUGAGGGGAAUGGUUCCUUU	UUAAUGGUAAAGACCUCACU	.....(((((((((((((....))))))))))))).....	-17.6	5
SP_0588	557963	560176	+	560193	213	8.17618	17	GAAACAUCAAAAGAUUCAGAAUAAGAAAAGGAGAAAUGUA	UGGGGUGGUGGCGCGAAACC	........................................	0	2
SP_0589	560192	560809	+	560852	158	6.96956	43	GAUACCUAUAUGAUUCAAGCAAGAAACAAGUUAAGCCAAG	AGGAGCUAUCUGAGGCGAAA	..........((.(((......))).))............	-0.6	0
SP_0590	560821	561705	+	561772	205	6.50128	67	ACUUUUAGUGAUGAAACUAAUUGUUCUUGGAUUUCAGCUU	UCCUGAUUAUGAUUUAUGAU	......(((..(((((((((......)))).)))))))).	-4.4	4
SP_0591	561787	563130	+	563232	221	6.81095	102	AUUCGCCGUCACCUCAUCCUCAAAGGUAUGACCAAACCCA	AUAAACUCCAUCAAGAAGCA	.............(((((((...))).)))).........	-3.9	0
SP_0592	563123	563509	+	563537	95	4.2974	28	AGUGGAGGGCUAGAACAUGAGGGCAAAAGAACUACAAGAC	UGGUUUCCUGAGGCUCGGAU	.((((...(((..........))).......)))).....	-2.3	1
SP_0593	563513	564397	+	564442	4862	213.905	45	GUUAAUAUUUGGAGAAGAGGAUUGCCAUCUUCUCCAUUUU	UAUGUGCAGAGUUAUAGUGG	.........(((((((((((....)).)))))))))....	-15.3	5
SP_RS02945	565269	565448	+	565523	153	7.8866	75	ACAGUCAAAUCGAUUUCUAACAAUAUUUUAGAAGUAGAGG	UGUACUAUUCUAGUUUCAAU	.........((.((((((((.......)))))))).))..	-5.3	1
SP_0599	565802	567079	+	567093	18	18	14	AAAGAAAUUUUAUCAUCUAUUAGUUAAGAAGGAGAAAUCA	UGACUUUAUUACAAUUACAA	......(((((.((.(((........))).)).)))))..	-2.3	1
SP_0601	567791	569170	+	569298	978	51.0261	128	AUAAAUCCGAAAGCAGUGGUGAAAAUCAUUGCUUUCAGUU	GCUUUCUUUGUACUUUAGUG	........((((((((((((....))))))))))))....	-16.2	5
SP_0603	569482	570138	+	570223	61	3.68509	85	AUAUUUAGUGUUCUGGUUAUCUGCCUUCAUUUAGCUAUUU	AUUUUCUUUUUCCUUCGACU	.....((((.....(((.....)))........))))...	-3.5	4
SP_0604	570135	571463	+	571525	64	4.09479	62	AUGGAGUUAGAAGAAAAUCAAUCGAAACUGCGGGAAAAAC	UAGAUUUUUUUGGCAAAAAG	..(.((((.((..........))..)))).).........	-2.4	0
SP_0605	571604	572485	+	572533	54413	261.482	48	GAAUAAUACAGAUAAAACCUGCCUGUGAGGGUGGGUUUUU	UGAUUUCAAGCUACUCGUUU	.............(((((((((((....))))))))))).	-13.2	5
SP_0606	572806	574008	-	572767	212	8.95775	39	AGUAAUCAUACUCUCCUGGGAUUUCCCAGGAGAGUUUUUU	AUAGCCAAAUGAAAUAAGAC	.........(((((((((((....))))))))))).....	-21.2	6
SP_0607	574254	574913	-	574106	88	8.51613	148	GUAUAAACAGCCACUCUCCAGUUCAAUUGGAGAGUUUUUU	GAUGAGAGUAGAUAUUUAUA	............((((((((((...)))))))))).....	-12.8	6
SP_0611	577440	579674	+	579709	1370	40.2941	35	GAGUAGAAGUUAGGAAAGAGUUGGGAAAUCAACUCUUUUU	UGAAAACAGACCUUCAUUUU	............((((((((((((....))))))))))))	-12.1	6
SP_0613	579849	581510	+	581556	19101	328.504	46	GAAAUAAACAGAGAGAAAGUCGAGUUUCGGCUUUUUCUUA	UAGAAAAAUAGAAGGAGAAA	..........(((((((((((((...))))))))))))).	-15	6
SP_0615	582470	583690	+	583739	75	3.92022	49	CACUAACAACACUCACGAAAGAAGAGUUUCAGACUUAUUC	UGAUCAGGUUUCUUCUCGUU	..........((((.........)))).............	-1.9	4
SP_0616	583695	584927	+	585024	2195	103.294	97	UUUGCUAGAAAGGUGGAGAGACAUGCGCUGGCUUUUUCGU	UUGAUAGGGGCUUUCUUUUC	...(((((....(((......)))...)))))........	-8.8	6
SP_0617	585006	585707	+	585731	19179	239.937	24	AUGAGACUAGUGAGUAGGGUACUAUCUUUCCCUACUUUUU	UUGCUAUAAUGGAACUAUGA	...........((((((((..........))))))))...	-10.7	6
SP_0619	587581	588414	+	588478	238	13.0769	64	AAACUAAAAAAGCGAUUUGCUGGUCCAAUCGCUUUUAGUA	UAUCUUAUACUCAAUGAAAA	..((((((..(((((((.........))))))))))))).	-10.1	5
F53	588512	588590	+	588689	146	8.62205	99	UGAGUUUUUCAAGGGUUCCGUCUUGAUAGAGUUCUUUGAG	CGCUUUAUCAAAUUGCUCUU	.(((((((((((((......)))))).)))))))......	-7.2	4
SP_0620	588596	589396	-	588526	72	2.18182	70	AGCUUUAUCUGCAACCUCAAAGCUGUGCUUUGAGCAACCU	ACGGCUAGCUUCCUAGUUUG	.((.......))...((((((((...))))))))......	-10.2	1
SP_0622	589567	590172	+	590221	121	4.34731	49	AAAAAUGACAGCAAUUGAUUUUACAGCAGAAGUAGAAAAA	CGCAAAGAAGACCUCUUGGC	..................((((((.......))))))...	-2.1	1
SP_0623	590185	591585	+	591625	25143	410.436	40	AAACGAUAGAAGUCUGAGAUCUUAUGCUUGGACUUCUUUU	UGGAGGGAAAGUAGAUGUCU	.......(((((((((((........)))))))))))...	-13.1	6
SP_0624	591639	592217	+	592298	30	2.12014	81	GCUGCUCAAAGUACAGCUUUGAAGUUGCAGAUAAAACUGA	CGAAGUCGGUAACAUACGCA	((.(((((((((...)))))).))).))............	-9.8	1
SP_RS11875	592221	592366	+	592463	69	4.54232	97	ACCAGCUUUCUUUAGUGGAUGUGAGAGAAGUGGAUGAGUU	UGCAGCUCUUCAUUUAGAAG	.(((..((((((..........))))))..))).......	-7.7	3
SP_RS03065	592377	592529	+	592667	70	3.52872	138	AUGUCCAGGGUGGCAUGUUAGCCUUUGAAGAACUUUAAAA	UUUUGCAUUUCUCCUACUUG	...((.(((((.........))))).))............	-4.5	3
SP_RS11470	592530	592664	+	592710	4551	148.402	46	UGCAUUUCUCCUACUUGGUGUGGACUGGGUAGGAGAGUUU	UAUUUUUAGAUAAUUCUUAU	.....((((((((((((((....))))))))))))))...	-19	3
SpF22_sRNA	592573	592712	+	592712	370	16.5179	0	CAUUUCUCCUACUUGGUGUGGACUGGGUAGGAGAGUUUUA	UUUUUAGAUAAUUCUUAUUU	...((((((((((((((....)))))))))))))).....	-19	4
SP_0626	592820	594160	+	594206	15168	266.339	46	UAAAUCACUUUUGUAGCCAAGUCUACAGGAGUGAUUUUCU	UUUUUUAUCCGAUGAUAAAU	.(((((((((((((((......)))))))))))))))...	-16.9	5
SP_0627	594258	595295	+	595435	123	6.3885	140	CCAGUAUUUUGAAGGCUAUAGUCUCUUUCUAGCCAAGGAG	CAUGUCAGCGAAUUGCACCA	.............(((((.((.....)).)))))......	-5.6	0
SP_0628	595264	595767	+	595771	374	14.155	4	GUCAGAAGUAGAUAAACUAUUAGAAAUAAAGGAGUAGAAA	UGAAGAAAAGAUACCUAGUC	......(((((.....)))))...................	-1.3	1
SP_0629	595770	596486	+	596514	330	9.60806	28	CUACGUCGAUUAAUACUCUUCGAAAAUCUCUUCAAACCAC	GUCAGCGUCGCCUUACCUAC	.....((((..........)))).................	-2.2	0
srn164	596533	596633	+	596690	249	10.2584	57	UCUUUGAUUUUCAUUGAGUACAAAAAGUAAACUUUUCUCU	UGCAAUUCCAGAUAAAUAGU	...............(((....(((((....)))))))).	-1.9	6
SP_0630	596795	597220	+	597360	658	12.0313	140	GCCGUAGAAGAGAAAAAUAGUAGACUGAAAACCCGCAAGA	CUUCAUCAUUUCGAGAAGUG	........................................	0	0
SP_0631	597427	598116	+	598171	114032	394.293	55	AAUGUAAAAAAGUUGAAGACGCUAUGUCUCAACUUUUUUU	GAUGUACGACGGGCAUGUUG	.....(((((((((((.(((.....)))))))))))))).	-12.9	7
Intron_gpII	598343	598408	+	598552	19	19	144	UACUGACUUCGUCAGUUCUAUCCACAACCUCAAAACAGUG	UUUUGAGCUGACUACGUCAG	.((((((...))))))........................	-5.6	1
SP_RS03110	599419	599664	+	599709	60	4.13793	45	UGCGUGAGUUGAUAAUUCUCAGGGUAUGGACUUCUUUUUC	AUGAAUGAGGUAAAAGAGCA	..(.((((.........)))).).................	-4.6	6
SP_0636	600065	601057	+	601172	81	5.86957	115	ACUUUAUUCUCUAUCGGAUUGGCGAUGUCAUGGGGGCUUU	UGUGGCCUUUUAUCUCUGGA	.((((((....(((((......)))))..)))))).....	-5.9	3
SP_0637	601059	601877	+	601880	106	7.632	3	AACGGGUCCAGUCCUUUAUCACCAUUCAAGGAGGUUAGUA	UGAAAAAAUAUCAACGAAUG	.((....((..(((((...........)))))))...)).	-3.8	3
F23	603204	603346	+	603346	25	2.27273	0	UAACCGUUAAGCCUUACUCUUAGCGGUUAUUUAUAUUGUU	UAAUAGCGCUAAUAUUUUAU	(((((((((((.......)))))))))))...........	-12.1	5
trn0329	603831	603887	+	604035	13	13	148	AUGCUUUAAACAUCUCUGAUAAAGAAAAAGUAGCAGAAAA	UAAAGAGAAACAUGAAAAUA	.((((.........(((.....)))......)))).....	-2.7	0
SP_0641	603895	610317	+	610378	289	16.7536	61	AUGGUUUAUGUACUGAGAUUAGAUAGUGAGGUGAUGACAU	AGUUUUGUGAAAAUAGCCAU	(((..((((.(((((........)))))..))))...)))	-2.6	2
SP_RS11900	612207	612350	+	612403	21	21	53	UUAGGAACUAUCCGUGAGUUCACUAAUCUGGAGAUUUUUC	AAUAGACUUCGUUAUUGGGC	(((((((((.......))))).))))..............	-6	5
SP_0645	612705	613181	+	613236	36	2.76923	55	AAAUAAAAUCGGAGGAAAUCUAAAUGAUUAAAAUUCUUGC	UGCCUGCGGUGCAGGUGUUA	...........(((((((((.....))))....)))))..	-2.7	4
SP_0648	615442	622143	+	622280	1216	77.617	137	AAAAGCUAGAUAUUUCCAAUUGUGGAACUCUAGCUUUUUA	AUUUUGAGUCAUUCUCUUAU	((((((((((...(((((....))))).))))))))))..	-15.4	5
SP_RS03180	622391	623002	-	622338	21	21	53	CGAUAAGGACAAUCAAAUCGAUUUCUAACAAUGUUUUAGA	AGUAAAAGUGUACUAUUCUA	......(((.((((.....)))))))..............	-2.3	4
R13	623327	623372	-	623307	478	19.5102	20	UAUCCAAAAAGGCAACGGAUUUGCCGUUGCUUUUUUGGAU	GGUUACGAUAGUCUUGGUAA	.(((((((((((((((((.....)))))))))))))))))	-24.8	5
SP_0650	623457	623816	-	623423	1121	15.4671	34	AAAUAGUCGAAUCCCUAAGCAUUUUCUAGGGAUUUUUGCU	UUCUCUACAAAAUAGUAUAG	....(((.(((((((((.........)))))))))..)))	-10.4	6
SP_RS03195	623740	624417	+	624478	84	4.39535	61	GAGAAAGUAUCCAAAAAUUGAGAUUGUUUCCCAUUUGAUC	AAUGGUUUGCCUGGUGAAAC	(.((((..((((((...))).)))..)))).)........	-4.2	4
SP_RS03200	624418	624864	+	624886	39	2.65306	22	AAAUGAAAAGACCACUUGAGAUGGCACAUGAUUUUUUGGC	UGAGGUCGUGACAAAAGAGG	...........(((...(((((........))))).))).	-3.1	5
SP_0652	624848	625405	+	625479	56	3.4087	74	CCAGAAUUUUGUUGAAUCAACCCACCACGAACGAGCGAUG	GGCGUGCUAGACCAAGCGCA	.......((((((................)))))).....	-1.1	1
SP_0655	625664	627718	+	627812	40	3.23232	94	UAUGUGACUGACUUCGUCAGUCUUAUCUACAACCUCAAAA	CAGUGUUUUGAGCAGCUUGC	.....(((((((...)))))))..................	-9.2	1
SP_0657	627882	628757	+	628826	213	9.81915	69	AUCAAGGCUUUAUAGAAUCUUGAUACUAUGCGCUUUUGUG	CUUUGACAGUUUUUUGUAUA	(((((((((....))..)))))))......(((....)))	-5	5
SP_0658	628968	629678	+	629699	13	13	21	UAAGUCAAUUAUUUGAAUAAAAUGGAAAGGAAUAUCAAUA	UGAAAAAAUGGCAAACAUGU	....((((....))))........................	-1.3	3
SP_0660	630275	631387	+	631406	10	10	19	UUUACUAGAUUAUGUUGAUUAAUACUCUUCGAAAAUCUCU	UCAAACCACGUCAGCGUCGC	......(((((...((((..........)))).)))))..	-2.6	3
SP_0661	631655	632392	+	632410	540	29.6907	18	UUAAGAAGGGAGAAGACCGAUGAAGCGUUCUUCUCUUUUA	GUUAGAAUGGUUAUUUCCAU	.....(((((((((((.((......)).))))))))))).	-14.1	5
SP_0662	632389	634080	+	634106	793	21.0904	26	AUAGAAACUAGCUAACUCCCAGUCAAUUCUGGGAGUUUUA	UGCGUAAUUGGGCAAACUUU	.............(((((((((......)))))))))...	-14.6	4
SP_0663	634175	634759	+	634782	143	4.94764	23	GCUAUUAGGAAGUUUUGAGAAUGAAUAAAGGAGAUAAAAG	UGUUUAAAAAAGACCGUUUU	........................................	0	1
SP_0664	634781	640501	+	640540	24376	402.751	39	AAUUGAAAUCUCUCAUCUGCUUUGCGGAUGAGGGUUUUCU	UAUUUUAUGCUAUACUUAAG	....((((.(((((((((((...))))))))))).)))).	-19.8	5
SP_0665	640562	642283	+	642324	443	32.0038	41	AUGAAAUUAAUAUUUUUGCAUGGGUUAGGGCAGUCAGCAG	AGUCUUGGAAAGAAGUUCGG	................(((.(((.(......).)))))).	-3.3	1
SP_0666	642284	642901	+	642927	31	2.00845	26	GAAUUGCUGAAAUAAGUUUGAUAAAAUAAUAUUGAAAUCG	AUAUCAUAAUUAUGGGAGAA	.....(((......)))((((((......)))))).....	-0.8	2
SP_0667	642951	643949	+	644045	274	12.106	96	AAGUGAAUGGAUUUUGAUAUACUAGUACUGUAAGCAUUUU	CAAUUACUACACAAUGAAAA	.((((..(((((......)).))).))))...........	-1.6	4
SP_0668	644076	645035	+	645090	8936	151.053	55	AAAAUGCUAACCUAGAGUUAGUAAUGUUCCUCUUUUAUUU	UUUAUGCUAUACUAGUUAGG	....(((((((.....))))))).................	-5.6	7
SP_0669	645132	645971	+	646017	1056	25.1429	46	UAGAAAAAAGAAGUUGAGAAUAAUCCCAACUUCUUUUGUU	UCUUAACGUGAUACGCGGCG	.....(((((((((((.((....)).)))))))))))...	-12.8	6
SP_0670	646019	646189	-	645980	24808	97.0199	39	AGAAACAAAAGAAGUUGGGAUUAUUCUCAACUUCUUUUUU	CUAUUCUUUUAAAUAGCUAG	......((((((((((((((....))))))))))))))..	-17.1	7
SP_0671	646310	647194	+	647258	63	3.34513	64	UCCUGCUGAUUGGUGUGGAAUUGCAGGGUAUGGACAGUUU	UGACCUCUCCAUGGAAGAAU	((((((.((((.......))))))))))............	-8.9	3
SP_0672	647187	648425	+	648491	143	7.3394	66	GGAGGUUAUACAAGUCUGGACAAGGUCUAUCUGGAUCAGC	UUCUAGCUGGUAAAACAGAU	.............(((((((.........)))))))....	-4	1
SP_0673	648418	649041	+	649108	60	2.95938	67	UUUUUAGGAACGGGGGCUGGUCAGCCCUCUAAAGCCCGCA	ACGUUUCAAGUCUCGCCCUG	......((...(((((((....))))))).....))....	-12	0
SP_0674	649056	649985	+	650007	158	9.48	22	GGAAGAAGUGGAAAUCUAGCAGUCACAGAAAGGAUAAGUA	UGCCUACUAUUCUCAUUACC	.......((((...........))))..............	-1	2
SP_0675	650006	650761	+	650811	1638	57.4737	50	AUGUGCAGGUUGUUGCUAGCCUACAUAUUGGUUCUUAUCA	UUUCUCAACUAUCAAACUGA	(((((.((((((....)))))).)))))............	-8.2	4
SP_0676	650815	651723	-	650759	1347	73.4727	56	AUAUGUAGGCUAGCAACAACCUGCACAUUGGUUCUUUUUA	CUUAUAAUUAAAAGUUUCCC	...((((((..........))))))...............	-5.7	6
SP_0677	651835	652056	+	652135	104	4.52706	79	UUGGCGUGGAUGGGCUUUAACUAUCUUCGUAUUCGCCGUG	CGGCUAAAAUUGUGGACAAU	...(((.((((((.......)))))).)))..........	-10	2
SP_0678	652056	652436	+	652473	89	5.5219	37	CUAACCUUAUUUCCAAAUUAGUCGAAUGAUAGGAUGAAGC	UAUUGUUUUAUAGUAUAAUU	.....(((...(((..((((......)))).)))..))).	-2.4	1
SP_0679	652555	652752	+	652790	3517	196.952	38	UAAAUAAAAGAAAAAAGCUUUAGUUUUAAAGCUUUUUUUG	UUUUAUCGACUCAUCUCUAA	.........(((((((((((((....))))))))))))).	-11.4	7
SP_0680	652792	653517	-	652758	104	104	34	CGAUAAAACAAAAAAAGCUUUAAAACUAAAGCUUUUUUCU	UUUAUUUACCGAAAAAUUAA	..........((((((((((((....))))))))))))..	-10.3	7
SP_0681	653679	655520	+	655598	322	6.37809	78	GGAAUUUUACUGCUCCUACUCUAUGUAUUUGCGACACCAG	AAAGCAUUAAAGGGACUGUC	..........(((...(((.....)))...))).......	-3.1	0
SP_0682	655540	655794	+	655822	18190	259.857	28	UAAAAGAAGAUAAAAAAGAGAGUUUCGGCUCUCUUUUUGC	UAGGAAUUUUACAAUAGUUU	............(((((((((((....)))))))))))..	-12.4	5
SP_RS03355	656110	656456	+	656509	78	78	53	UUAAAUCGUUCCCCUUGUAAGAAAUUACAGGGGGAAUUUU	GUUUACAAGGAGUCUACUAU	.......(((((((((((((....)))))))))))))...	-19.5	4
SP_0687	658550	659191	+	659245	173	173	54	AGUUAGAAGAAAGAGUCACAAACACACUUUGUGGCUUUUU	UAUUUCCAUAAAAAUGGUAA	.........(((((((((((((.....)))))))))))))	-12.4	5
SP_0688	659295	660647	+	660707	146	7.61739	60	ACAGGUGGGGGGACGGUUGGACACGUUACCCUCAAUCUUU	UGUUAAUGCCCAAGUUCAUC	..(((((((((((((........)))).))))).))))..	-14.2	4
SP_0689	660649	661707	+	661850	39	2.56364	143	AAGAAGGCUGAAGAAGAGGCGGCUCUAGCUGAGGAGAAGG	AAAAGGAAAGACAAGCUCGA	.....((((.....((((....))))))))..........	-5.8	0
SP_0690	661717	662916	+	662953	288	6.56093	37	CUAGGUUUACCUUUUCUCUUAUAGUUCUUUAGUGACCAUG	UUUUUACGUUUAAUAUUUGA	...((((..........................))))...	-1.7	2
SP_0695	664585	665289	+	665395	54	3.67742	106	GUAGCUUUUUUAUCUGCUAUUGGGCAGUUCACUGUUAUAG	AAACACAAUUAAUAGUAUUG	(((((........(((((....)))))......)))))..	-7.8	4
SP_0696	665286	665666	+	665669	79	5.04255	3	GUUAUUAUAUAACUUUAUUAUUUAGCAAGGAGGCUUAGUA	UGUUUAAAAAAAUAGGUAUA	(((((...))))).....((((.(((......))).))))	-3.6	3
PyrR	668006	668110	+	668110	99	99	0	UUUUUCGUGGAACCUUGCUGUUGGCAGGUUCCUUUUUUCG	UGGCUUCUGUUGGCCAGACU	........(((((((.(((...))))))))))........	-13.3	6
SP_0701	668161	668862	+	668900	19	19	38	UAAAGAACUAGAUUAGAAAAAUAAAAGGAGAAUACCAUGA	CACUUGCUAAAGAUAUCGCU	..........................((......))....	-0.5	2
SP_0702	668896	669528	+	669572	124	4.76923	44	AGUAAGAUAAAGAGAGACGAGGCUACCGAGUCUCUUUUAC	CAUUUUAUUUAAAAUAUGAC	.........(((((((((..((...))..)))))))))..	-13.1	5
SP_0703	669761	670111	+	670187	327	19.62	76	UGUGGGUGUAGCAUGAAAAAAGAAUGCUACACCCUAUUUU	UAUUAUAAGGAGGAGUAAGG	...(((((((((((.........)))))))))))......	-19.4	5
SP_0704	670207	670971	+	671053	13	13	82	GUAUUGGUUUAUUUUAUAUUACUGCUAUCCUGUGUUUUAU	CUAGUACAGUAUAUUUAUUG	...............(((..((.((......))))..)))	-0.3	6
SP_0705	670971	671723	+	671869	11	11	146	GGAUUAUGGUAUUGGUUAGAAGGAAAUGAUAGACUUGUUA	UAGAAAUUUUAAAAGGGCCU	.......(((....((((........))))..))).....	-0.7	4
SP_0707	672428	673075	+	673153	204	6.8	78	UUAAAAAGGGAUUGGAGCUUAAAAUCCAGUUCCUUUUAAG	AGUUAAUGACUAAUCAACUU	...(((((((((((((........)))))))))))))...	-16.9	4
SP_0709	674045	674803	-	674032	24	24	13	UUUAGCCAAUUCGGCUCAUAUCUAUAAAGGAGAUUCUUAU	GAAACUAUUCAAACCACUCU	...((((.....))))...((((.......))))......	-4.7	5
SP_0713	676609	678099	+	678134	13630	126.24	35	AAAUAAAUUCUUAUCCUCUGGGUCUUAUCAGAGGAUUUUU	UGAUUCAAAAAGAGACUGAA	............(((((((((......)))))))))....	-12.6	5
SP_0714	678711	680057	-	678663	19	19	48	CGAGAUGAAAAAAUCGUGUGACGCACCAAGGGAGGAGUCU	GCCCUUUUGAGGAAAUCUAG	((.(((......))).)).(((...((......)).))).	-4.7	2
SP_0715	680430	681566	+	681598	4386	9.87903	32	UUGUAUUGAUAAAACAGAUUGCCUCCACUGAAUGUGGAGG	UUUUUCUUCGUGUAUUGGAA	.....................(((((((.....)))))))	-12	2
TPP	681820	681908	+	681976	1302	98	68	UGUAAGUCAACUCUAAUUCUUGAUUGUAAUUGGAGUUUUU	UGUUUAUAUAAACUGGAUAG	........(((((((((((......).))))))))))...	-9	5
srn176	681822	681975	+	681976	1302	41.5872	1	UGUAAGUCAACUCUAAUUCUUGAUUGUAAUUGGAGUUUUU	UGUUUAUAUAAACUGGAUAG	........(((((((((((......).))))))))))...	-9	5
SP_0716	682123	682791	+	682880	35	2.53012	89	AUCUCUUCAAACCACGUCAGUUCUAUCCACAACCUCAAAA	CAGUGUUUUGAGCAACCUGC	........................................	0	1
SP_0718	683812	684441	+	684545	13	13	104	AGCUUGAAUGGCUAAUUCAUCAAACAGGUCAUUUGUUUUU	UGCAAAAGAAAGAUCUGCUG	.....((((((((.............))))))))......	-5.5	7
TPP	684650	684738	+	684808	437	27.3125	70	GUAAGCUGAACUCUAAUUUGUAUCUGUAAUUAGAGUUUUU	UCUUUUACGAAACUGGAUGA	.......(((((((((((.........)))))))))))..	-9.7	5
F27	684656	684797	+	684808	437	12.2238	11	GUAAGCUGAACUCUAAUUUGUAUCUGUAAUUAGAGUUUUU	UCUUUUACGAAACUGGAUGA	.......(((((((((((.........)))))))))))..	-9.7	5
SP_0719	685000	685560	+	685628	16	16	68	UCCCCAAUCUUCUCUGAGCCGUUUGAUUUUACUUUUCAUG	CGCAAGCCUUUACCUUGUUA	..............((((..((........))..))))..	-0.6	5
SP_0721	686948	687598	+	687610	22	22	12	UAUUGCUUCAAACCAGUCUAUUUUUAUAAAGGAGUUAUUA	UGGAAUUUACAGAUAUUGCG	....(((((.....................))))).....	-1.6	4
SP_0722	687609	688301	+	688345	50	2.99145	44	CAUGAGAAAGCACCAAUUACAAGUUCACAAAUUAACCAUU	UUAUCUAUGAUGAUUGCCCU	........................................	0	3
SP_0724	688830	689633	+	689744	11	11	111	GAGACGGCCUGCCGUUCAGGGGUUACCAUAGUCCAAUUGC	GAGAAAAAAAUCUCACAACC	..(((((....)))))..(((.(......).)))......	-7.4	2
SP_0725	689626	690258	+	690259	14	14	1	GCAAGCCUUUUUAAAAAAGUUGCAUAACAUUCUUUCCUAA	UUAAUACUCAAUGAAAAUCA	((((..(((((...))))))))).................	-3.7	4
SP_0726	690468	691259	-	690419	577	17.1297	49	CUCUCUAGUUCCCACUUUAAGGGAAUUAGAGAGUUUUUAU	ACUCUUCGAAAAUCUCUUCA	(((((((((((((.......))))))))))))).......	-20.4	6
SP_0727	691625	692020	+	692032	126	5.80364	12	UAACAGAAGUAAGAUGUAAUUGUAUGUAAAGGAGACGUCA	UGUUAAAUAGUAUUGUAACC	............(((((..((.(......).)).))))).	-3.4	1
SP_0728	692031	692402	+	692413	62	3.97861	11	AUGAUGCACGGCAAGAUGAUUGUAGAGUAGGUGGAGACUA	UGACAGAAAUUGUGAAAGCA	....(((...((((.....))))...)))(((....))).	-3.6	1
SP_0730	694862	696637	+	696734	358600	1097.01	97	AGAGCAGAACUUUAAAAGAUCGGAGCAAUCCGGUCUUUUU	AUGGAGGAGAGUAAAUGAAU	.............(((((((((((....))))))))))).	-13.8	6
SP_0731	696748	697095	+	697188	11390	392.471	93	AAUAUGAACUAUUGAAAGAUCGGAGCAAUCCGGUCUUUUU	AUAUAAAGAAAUUGCAUAUA	.............(((((((((((....))))))))))).	-14.2	6
SP_0735	698523	698819	+	698902	41	41	83	UAUAAGAUGUAAAAAAGAGUUCAAUUCGAACUCUUUUUUU	GCUAUAAUGAGGGGAGAAAA	..........((((((((((((.....)))))))))))).	-12.4	7
SP_0736	698940	699884	+	699922	1252	40.3871	38	UAAAAAGAAAGGGCCUGAGUUCACUACUCAAGUCCUUUUU	GAUUACAUAAAUUGGGCAAU	.....(((((((((.(((((.....))))).)))))))))	-15.7	6
SP_0737	699924	701271	-	699884	1669	48.0782	40	UCAAAAAGGACUUGAGUAGUGAACUCAGGCCCUUUCUUUU	UAUGGAUGGCUAACAAUCAA	....(((((.(((((((.....))))))).))))).....	-13.2	7
SP_0739	701499	702239	+	702269	345	4.27434	30	AUGCAGAAUAAAUAGGCUAGGAAUUUCCUAGCCUAUUUUU	UACUUCAAAUCAUAAAGCCA	.........(((((((((((((...)))))))))))))..	-18.3	6
SP_0740	702268	702723	-	702235	1381	64.2326	33	GAAGUAAAAAAUAGGCUAGGAAAUUCCUAGCCUAUUUAUU	CUGCAUUUGUCUGAACGUAA	........(((((((((((((...)))))))))))))...	-18.8	6
SP_0742	703977	704822	-	703936	19587	243.317	41	UGCAUUCUUGACAAGAGGUGACCAUCAUCUCUUGUUUUUU	UGUGGUACAAUAGAGCUAUG	.........((((((((((((...))))))))))))....	-14.6	7
SP_0744	705523	705990	+	706037	1306	64.0196	47	UCAAAAAUAAAUGGUUUAGAAAGAUUUUUAAACCGUUUUU	UGGUAUAAUAAGAAGAAUAA	........(((((((((((((....)))))))))))))..	-10.9	5
SP_0745	706079	706708	+	706811	5927	152.709	103	UUCUGUCUAAUGAAAGCAGAGCAAAAAUUUGACCUUUUUU	GACCAAGAUAUUAUAAUAGU	(((((.((......)))))))...................	-4	6
SP_0746	706882	707472	+	707511	19532	231.605	39	AAUGAUGAUAGAAGGCAAACUCGACUGGGUUUGCUUUUUU	UGGUAUAAUAGGGAGAGAUU	.........(((((((((((((....))))))))))))).	-14.5	6
SP_0748	707551	707799	+	707835	90	5.37964	36	GAUAGGAAAACGUUAUCAUCGAAAAAGUUCAAGGAAAACA	UUGACAAUUUUCUGAUAAUU	(((((.......))))).......................	-2.2	0
SP_0749	707900	709060	+	709112	14652	176.429	52	UGAAAUAGGGAAUGAGCCUUUGACUCACUCCCUGUUUCGA	UAUUUAAUACUCUUCGAAAA	(((((((((((.((((.......)))).))))))))))).	-19.2	4
F28	709064	709122	+	709122	247	11.3208	0	AAUGAGCCUUUGACUCACUCCCUGUUUCGAUAUUUAAUAC	UCUUCGAAAAUCUCUUCAAA	..((((.......)))).......................	-1.8	4
SP_0750	709328	710197	+	710232	83	4.84436	35	GUGUAAACGAUGAAGGAAAAUUUAAAAGUUAAUAUUCUAU	GGUUACUCCUUUUGUUAGCU	((((.(((..((((......))))...))).)))).....	-1.4	5
SP_0751	710201	711157	+	711158	42	3.13158	1	ACGUUUCUUUAAAAAAUCUAAGAAGGAGGAACAAAACUAA	UGGCAUUACUUGAAGUAAAA	..((((((((..............))))))))........	-4.9	1
SP_0752	711157	711921	+	711922	96	5.36471	1	UAAACGCGUUAUCGAAGCUUAUCUAGGAGGUGAAGCCUAA	UGUCUAUGUUAAAAGUUGAA	.....((.(((((....((.....))..))))).))....	-4.6	1
SP_0753	711921	712631	+	712668	291	9.67551	37	CUAAAACAAUCCAGUGGAUUGUUUUAGUCGGCAGAUGGAG	AUUACGAAGUAAUCAUCAAU	((((((((((((...)))))))))))).............	-13.3	1
SP_0754	712939	713595	+	713625	1492	45.4705	30	AAGUCUUGUAAGAAGGGAAGCCCAAAGGCUUCUUUUUUCA	UGAAAAGGGGAUUAGAGCAA	..........((((((((((((....))))))))))))..	-13.7	6
SP_RS03695	713821	714798	+	714829	2028	65.1453	31	AAUUAGCUAAGAUAGAAAGGAACUCACAUGUCAAUUAUUG	AAAUGAGAGAUGUCGUUAAA	..........((((..............))))........	-0.6	4
SP_0756	714816	715508	+	715519	135	5.85165	11	UCAAAAGGAGAGUAUGGAUACGAUGAUUAGUAGAUUUUUU	CGCCAUUUAUUUGAAGCCUU	..................(((........)))........	-0.6	6
SP_0757	715501	716427	+	716472	23941	296.025	45	AAUAGCUGCUUUUAUGAGGAGAUUGUAAAAUCUCCUUUUU	UGCUACAAGAGUUUUUGAAA	...............(((((((((....)))))))))...	-11.5	6
F58	716443	716473	+	716473	1734	23.8843	0	AUAGCUGCUUUUAUGAGGAGAUUGUAAAAUCUCCUUUUUU	GCUACAAGAGUUUUUGAAAA	..............(((((((((....)))))))))....	-11.5	6
SP_0758	716713	718893	+	718931	3859	84.6581	38	UAAUAUACUUGAGGUUGGAAGCUGUAUUCCAACCUCUUAU	UUUGGGAGAAAAGAAUGAAA	..........((((((((((......))))))))))....	-16.6	4
SP_0760	718945	719760	+	719802	374	18.7	42	AACUGAAAAGAGGUUGGAACUAUAAAAUUCCAGCCUUUUC	UUACUAGAGAAGCUACUGGA	.......((((((((((((........)))))))))))).	-14.8	4
SP_0761	719900	721243	+	721278	15117	168.73	35	UUUUAAUAGAAAUUGUUGGAGUAUUGAGCUCCAACUUUUU	UAUUUAUGAGAACGAACUAU	.........(((..((((((((.....))))))))..)))	-11.9	5
SP_0762	721458	722648	+	722679	16820	151.805	31	AGUAAAAUAAGAUUUUAAGAGGGGAACGUCCUCUCUUUUU	UAUAGUUUUUAACUAUACUG	................(((((((((...)))))))))...	-10.9	6
SP_0764	723201	724136	+	724278	626	13.4339	142	GACAGAUCAGGGUCAGUUUGAAGUGAUGAAGAGUCAAAUG	UUGAAACAGAUUGGGUAUGA	(((...((...((((........))))...))))).....	-4.8	2
SP_0765	724170	725207	+	725258	27531	471.491	51	AACUACAACCCGCGUCAGGACUAUCUUGUCGUGGGUUUCU	UGCUGAUUUGCUUAUUUUAU	......((((((((.(((((...))))).))))))))...	-18	4
SP_0766	725380	725985	+	726021	23406	85.7688	36	AAUAAUGAUAGUUGGAGGGAAGAAUUGUUCUUCUCUUUUU	AGGUUAUAAGAUUCUGGUCU	.............(((((((((((...)))))))))))..	-10.3	6
SP_0767	726141	726653	+	726789	174	8.04091	136	CGUGCAGAUCAAAUCUGGGAAUGGCUCUACCGUAAACGUG	UGCAGUCAUUUGAAGAAAUG	..(.(((((...))))).).((((.....)))).......	-5.5	2
SP_0768	726674	727759	+	727908	234	13.6682	149	GAACUCCAGGUAUUCAGCAUCUUGGACGCCUGGUUUUUCU	UUUGACUCCUUUCAAUUCUC	(((..((((((.(((((....))))).))))))...))).	-13	6
SP_0770	728243	729784	+	729832	373	12.1548	48	AGUAAAAGAAAUACAGUACCGAAUGUGGAUACUGUAUUUU	UUUGGUUUUUAAGAUUUAAA	.......(((((((((((((......)).)))))))))))	-13	6
SP_0771	729840	730643	-	729797	12118	213.583	43	CCAAAAAAAUACAGUAUCCACAUUCGGUACUGUAUUUCUU	UUACUCUCAUUCUUAAGUUA	......((((((((((((.......))))))))))))...	-12.3	6
SP_0775	731798	732070	+	732189	542	12.6166	119	UGCCUUAACUAUCAAGAUUGAGGAUACACCAGAAUUUUUG	GAAUAUCAUUUGAAUCUUGA	..((((((((....)).)))))).................	-5.3	5
SP_0776	732090	732329	+	732359	73847	556.942	30	ACGAAAAAUAAGAAGGGCGGGACGGAUGUCUCGCUUUUUU	GUGUGGAAUAGAAGAUAUAG	..........(((((((((((((....)))))))))))))	-15.7	6
SP_0777	732906	733694	+	733723	48	2.64949	29	UUGUUAGAAUAAGAUGGAAAAAAGGAGAUUACAGGAGACA	AGAUGAACUACUUUAAUGUU	........................................	0	0
SP_0778	733725	734243	+	734269	71	3.64653	26	GACGAUGAAGAUUGAUAUUUUAACCCUCUUUCCAGAGAUG	UUUUCUCCACUGGAGCACUC	..((((....))))...........((((....))))...	-3.4	1
SP_0779	734233	734952	+	735067	2931	77.8831	115	AUCUUGAAGGCAGCCCAAACUGUUUAUGUUUUGACAGAUG	AUUUGCGUCAAAAUCUUGCU	(((((.((((((..............)))))).).)))).	-4.5	1
SP_0780	734964	735302	+	735343	1094	23.6485	41	GAAAAAAGAGUGGGAUGAAGCAACUACAUCUCACUCUUUC	UUAAAUCUAUUUUUUUGGGC	....(((((((((((((.((...)).))))))))))))).	-17.6	4
SP_0781	735333	735653	-	735302	1809	16.1629	31	AAAGAGUGAGAUGUAGUUGCUUCAUCCCACUCUUUUUUCU	UAGCGAAUUUGUUCAAAAUG	((((((((.((((.((...)).)))).)))))))).....	-13.1	7
SP_0782	735727	735966	+	736007	71	4.30303	41	UACUCUUCGAAAAUCUCUUCAAACCGCGUCAGCUUUGCCU	UGCCGUAUGUAUGGUUACUG	.........................((....)).......	-1.5	4
SP_0783	736172	736708	-	736133	1657	91.6638	39	AAAAAGGAUAUCGAGUUAUCAUGACUCAAUAUCCUUUUCU	UUUAUUUUGAAAACUUAUAC	.((((((((((.((((((...)))))).))))))))))..	-16.1	5
SP_0784	736905	738251	-	736861	19508	224.682	44	AACAAAAGAAGCUGAUAUAAAUAUGUCUGCUUCUUUUUUA	AUGAUUUUCGAAUCAACAAA	...(((((((((.(((((....))))).)))))))))...	-13.9	6
SP_0785	738516	739715	+	739796	148	8.24677	81	GAACUGCAGGUUCUCAAAAAUAUCAAUCUAGAAGUGAAUG	AGGGUGAAUUUGUAGCCAUC	(((((...)))))...........................	-2.9	2
SP_0786	739699	740400	+	740403	338	19.1939	3	CGUCUGACAGUGCUCAGUUAGGAAAGGAGGAAAACUAAGA	UGCAGAAUCUGAAAUUUGCC	...((((......))))((((.............))))..	-4.7	1
SP_0787	740402	741661	+	741697	8052	171.137	36	AAUGAGAUCAACAAGAUGGACACUCGUCUAUCUUGUUUUU	GUAUGGAUUUCCCUAUUGAA	.........((((((((((((....))))))))))))...	-15.4	7
SP_0788	741785	743782	+	743819	22331	181.78	37	GUAAAAGUAGACAGGACUAGUUCAGGCUAGUUCUGUUUUU	UUAUUUAUACUCAAUGAAAA	........(((((((((((((....)))))))))))))..	-15.9	6
SP_0789	744245	744568	+	744573	86	5.52941	5	AGUCAAAAAGUAGAAGGGAUUAAGAAUGGGGGUUAAACCA	UGAAGAAAAUGAAGUAUUAC	..........................(((........)))	-2.2	2
SP_0790	744572	745387	+	745418	1797	59.3349	31	UGAAGUAUAGUCAAAAAGUCGUUGCAAAGCGGUUUUUUGU	UAUAAUGAAGGGAAGAAUGU	...........((((((((((((....)))))))))))).	-8.6	7
SP_0791	745462	746388	+	746445	1227	59.7416	57	AUAACUCACAUUCAAAAAGCCGUAUAAAGCGGUUUUUUGC	UAUAAUUAAAUGAAGAAUGU	............(((((((((((.....))))))))))).	-12.3	6
SP_0792	746484	746720	+	746849	78	3.77143	129	GACCAAGGUGAAAAGCCACUCUUAGAGGGUGAUUUUCGCU	UUUUACAGAGAGAUUUGACC	......((((((((..((((((...)))))).))))))))	-13.1	5
SP_0793	746713	747411	+	747423	61	4.29577	12	CAAUAGAUGGUGGCUGGUCUUUGAAGUAGGAGGAGUUGGA	UGGAAAUCAAAAAUCACUUU	...........((((..((((......))))..))))...	-3.9	2
SP_0794	747422	747922	+	748007	29	2.01196	85	ACGUCGGCAUGAUUCGUGGGGAAUACUUAUUGAGAGAGCU	CAAUCAAAAUAUACUAUUAC	.....(((.(..((((((((.....)))).)))).).)))	-5.9	1
SP_0795	747900	748769	+	748899	38	2.36515	130	AAGGAGAAAAGACAGCAACAGCAUCAGCCUAUGACCUCUA	UGUGCUAGAAGACGAACCAC	..((((........((....)).(((.....))).)))).	-2.9	2
SP_0796	748744	749184	+	749234	1916	43.9738	50	AGGAAGAAAGUUUUGGAAAUCGCUGUCCAAUCCUUUUUUC	UGAAGCAAAAUAUGAUAUAA	..((((((((..(((((........)))))..))))))))	-11.8	6
SP_0797	749307	751853	+	751918	25279	306.927	65	UCAGCUAUCUCAUGUAAAAUGCAGAGAGUUGAGUUUUUUU	UAAGGCAAAUUUGGUAUAAU	((((((.((((((.....))).))).))))))........	-10.2	7
SP_0798	751962	752636	+	752690	594	17.9689	54	UGGUAUGCGGAUGACUUUAGUUAUUUUAUCCGCAACUUCG	GUGUCUUCACCCUGAUUUUU	.(((.(((((((((..(.....)..))))))))))))...	-12.1	2
SP_0799	752626	753960	+	753991	16061	122.044	31	GAAAAAAUAAAAAUAUCGCUCCAAUUGGGGCGAUAUUUUG	GAUUUAUCUUCUACGUUUUC	.........(((((((((((((....))))))))))))).	-17.8	5
SP_0800	753994	754281	-	753957	15660	263.077	37	UAAAUCCAAAAUAUCGCCCCAAUUGGAGCGAUAUUUUUAU	UUUUUCUUUUUAGAUGGUGU	.......((((((((((.((....)).))))))))))...	-13.4	6
SP_0801	754421	755350	+	755404	3982	92.7845	54	UUGAGAGAAGGAAGAUGCAAACAUUUCUUCUCUCAAUUUU	UCGUAUUUCUUCACUAUUUU	(((((((((((((..........)))))))))))))....	-15.9	5
SP_RS03925	755378	755566	+	755683	27	2.45455	117	AUUGAGGACGGAGAAAUCGUCGAUCACUAUACGACGGAUG	UCAAUCCACAUGAACCCUUG	.................(((((.........)))))....	-5.6	1
SP_0803	758037	759260	+	759272	58	3.3944	12	AAAAGGUUGUAUUAAAACAAAUUAAAUAAGGAGAAAAUCA	UGGUAAAAGUAGCAGUUAUA	......((((......))))....................	-0.6	1
SP_0804	759271	759825	+	759850	2530	100.625	25	UGGUAAAAAUCAGUAAAACGGGAGUUAUUCUCUCGUUUUU	UAUGUGGAAAACUCAGGGAA	((((....))))..((((((((((.....)))))))))).	-11.5	6
SP_0805	759901	760473	+	760573	201	9.34884	100	AGUCAAAUUCAAGUUUUAGAGGGCUUAGAGGCUGUUCGUA	UGCGUCCAGGGAUGUACAUU	..................((.((((....)))).))....	-4.4	4
SP_0806	760488	762434	+	762526	227	6.6747	92	CGAUUGUUUCAAGUAAAAAAGGAGUUUGAUAUGUCUAAUG	GACAACUAAUUUAUUUAAUG	.(((....(((((...........)))))...))).....	-1.8	3
SP_0807	762516	764243	+	764294	13822	281.996	51	AGAUUUUAUUGUGUGAGGAGCAGAAUCAAAUCUUUUUCUA	UAGUUGUGGGGAGAUUUACU	((((((.(((.(((.....))).))).)))))).......	-7.6	6
SP_RS11955	764266	764478	+	764617	2146	92.5998	139	ACUAGAGAACUCACGGAUAGUUCCUAAUCUGGAGAUUUCU	UAUUUGCACUUUUCUUGUAC	...(((((.(((.(((((........)))))))).)))))	-10.9	4
SP_0808	764616	764741	-	764563	11	11	53	UAGGAACUAUCCGUGAGUUCUCUAGUCUGGAGAUUUUUCA	AUAGACUUCGUUAUUGGACG	..(((....)))(.(((.((((((...)))))).))).).	-7.4	5
SP_RS11965	765124	766036	+	766168	41	2.86047	132	ACAGUCAAAUCGAUUUCUAACAAUGUUUUAGAAGCAGAGG	UGUACUAUUCUAGUUUCAAU	.........((..(((((((.......)))))))..))..	-3.8	0
SP_RS11970	766098	766277	+	766294	10	10	17	UUUGACAUCUUUUUCUGUACUUAGCCAAGUCAGUUUUCCG	UUCUCAAAGCGUUUAUAUAG	..............(((.((((....))))))).......	-3.4	4
SP_0816	768201	768500	-	768169	694	19.4224	32	UCAAGUAAGAAAAUUGAGUAAAAACUCGAUUUGAGAGAAA	GUCCAAUAAGUCUUUCAAUA	..........(((((((((....)))))))))........	-7.8	0
SP_0820	770258	772516	-	770210	11307	83.3099	48	AAAAAGGAGUAGAAAAUGAAAUUUUUCUGCUUCUUUUUUU	ACUAAAAUAACUGUAAUUUC	((((((((((((((((......))))))))))))))))..	-16.7	7
SP_0822	772745	772975	-	772675	21316	291.637	70	UCUAAGUAAAAUCCUUUUUGUCUCACAAAUAGGAUUUUUU	UAUAGUCCAAAUUCACAAAA	.......((((((((.(((((...))))).))))))))..	-10.3	6
SP_0823	773165	773848	+	773881	13	13	33	AGAAAUAAUGACAGAAACCUUGAUAAAAAUUGAAAAUUUA	CAUAAAUCCUUUGGAAAGAA	........................................	0	3
SP_0824	773848	774582	+	774662	2457	156.225	80	UAAAGAGAAGAUUAGUGAAAAGCUCAACCAGAGCUUUUUC	UUAUAGUUUAAAGCUAUAGG	................(((((((((.....))))))))).	-9.8	5
SP_0825	774761	775618	+	775731	412	29.4286	113	AGAAAUAAGUUUAUAAAAGGAGGUUUGCGCCUCCUUUUUG	UUGUAUAAUGGAGUGAGGUG	..............((((((((((....))))))))))..	-12.9	5
SP_RS04045	776592	777431	+	777540	533	26.2131	109	AUUCUUCUUGCUAAGAAACUAAAUUUGUUCGUUUUUUUAC	UCUUGUAAAUCUAUUUUUGU	............(((((((...........)))))))...	-1.6	6
SP_0828	777729	778412	+	778427	125	7.28438	15	UUUCAACUUCAAAAAAAGGAAAAUAGAAGGGGGCAUAAGA	UGUCUAAAUUUAAUCGUAUU	..((..((((...............))))..)).......	-3.3	1
SP_0829	778426	779637	+	779710	66	4.70379	73	UCAAUGUUGGUGGUAAGAAUAAGGUCGUCAUGGCGGAGCU	UCGUCAAGAAUUGACAAACU	......((.((.((..((......))...)).)).))...	-2.7	1
SP_0830	779639	780200	+	780201	40	2.62774	1	GGUCAAAUGCUAAAAAAAUAAUAAAGGAGACACACAAUGA	CAUUUUUAAACAAAAUCCAU	.(((........................))).........	-0.1	1
SP_0831	780197	781006	+	781095	190	12.6667	89	GCCUAUCCGGAUUAAAGAAGAAACAGAGGAAUACUAUGAG	CUUCUUCCUGCUCUUAUAAC	.....(((...................)))..........	-1.1	2
SP_0834	782487	782999	+	783078	162	10.2676	79	AGAAAGUACUACCUGAGCUUGAAUAGGACUCAGGUAGCUC	UCUAUGAAAGAACAAAAUUA	........((((((((((((....))).)))))))))...	-15.7	2
SP_RS11990	783441	783647	-	783394	72	4.01717	47	UCGCUAGAUCAACUAUCUUUUUCCCACUACUUUUAGGGUG	GGGUCAAUUCCUUUCUUAAU	......................(((..........)))..	-2.3	3
SP_0835	783653	784363	+	784451	4359	194.126	88	AGCUAAGCUUGAGAAAGGACAAAUUUCGUCCUUUCUUUUU	UGAUAUUCAGGGCGAUAAAA	..........((((((((((.......))))))))))...	-13.1	7
SP_0837	785809	786333	-	785793	527	2.96567	16	AAAAGGAAGUCCUACAAUUCAUAAAGGGCUUCCUUUUUGG	GCUCUAUAAUAUUUGUAGUG	(((((((((((((...........)))))))))))))...	-16.4	5
SP_0838	786386	786637	-	786360	148432	417.111	26	AACUUGUUAAAUAAGAAACAGUCCAUAGAGGCUGUUUUUU	UGUCUCCAAAUAGGAAAAGG	............(((((((((((......)))))))))))	-10.3	7
SP_0841	788410	789000	+	789043	49	2.91171	43	GCAGUUGAUUUAAUCCAAAAAAAACGAGACGGUCAAGAAC	UGACUUCAAGUGAAAUUGAA	....((((((...((..........))...))))))....	-2.2	1
SP_0842	788997	790274	+	790424	51	2.77174	150	UGACUUUGCCAGUGUUUGCGUUAAUCCGACCUGGGUUGAA	CAUGCUAAAAAAGGACUUGA	.......((........)).(((((((.....))))))).	-5.7	2
SP_0843	790292	790954	+	790954	158	6.31734	0	UAGCUAUUUUAAAAGGAGAAUUGGCAGAUGGCGACUACUG	AGUUGAUUGAACUGGCAAUU	..(((((((...((......))...)))))))........	-5.2	2
SP_0844	790941	791330	+	791335	825	34.4828	5	GAAUUACUUCCAUACUCUUUUACAGACUUAAACUAGUCUG	AGUCGCUCUCUGAGUGGCAC	......................((((((......))))))	-6.9	3
SP_0845	791420	792472	+	792517	3379	13.6713	45	UGGAAGUCAUUUCUUAGGAAGCGGCCAAGGGCCGCUUUUU	UAAGAGUUGAGACAAAGUCA	.((((....))))..(((((((((((...)))))))))))	-16	5
SP_0846	792616	794151	+	794259	283	10.5613	108	AUGUGGAUCUUCGGUUAUGAUGCUAUUUGGGGCUACGAAG	AAUUGUUCUAUACAGCCUUU	..((((..((..(((......)))....))..))))....	-5.2	1
SP_0847	794144	795202	+	795206	96	4.32558	4	UGUCAAACCGAAAAAACAAGUUAAAGGAGGUAAGUAAAGA	UGUCUAUUAUAACCUUGCUC	......(((...................))).........	-1.1	1
SP_0848	795205	796161	+	796243	6356	92.7071	82	AAAAGUUAGACAGAAAAAAUCUAACUUUUGGGGUGUUUUU	AUUAUGAAAUUAAGUUAUGA	((((((((((.........))))))))))...........	-7.6	6
SP_RS04155	796189	796458	+	796606	13	13	148	UGAGAAACCAAGAGGGAGAGUACCUGAGAGCGGAGAAUGC	CAUCCUAAAAAAGUUAAGAG	............(((.......)))....(((.....)))	-2.9	1
SP_0851	797560	798201	-	797469	3879	160.209	91	GGAUUUAGUUCUGUACUGCACAGGACUAAGUCCUUUUAGU	UUUACCUUAAUUCGUUUGUU	((((((((((((((.....)))))))))))))).......	-19.2	5
SP_0852	798337	800280	+	800336	151	6.48156	56	UGUUAGUAAACUGGAAAUUAGAGUCGGAUGUGAAUGACUA	UGUGAAAAAGCAGUUUGAAA	.....................(((((........))))).	-4.2	2
trn0423	800595	800664	+	800695	116	5.35669	31	AAGAAUUUUCUAUUUUCACUUGGUAUUUUAUGGGCUUUGU	AUCUUAUGUCUAACAUUCAA	.(((((...(((........))).)))))...........	-0.2	4
SP_0855	800700	803171	+	803238	180	7.2905	67	UUGGUUUUUAUUGGAGAAAUUUUCUGAAAAUUACAAAAUA	UACUUGCUAUUUUAGAAAAA	.((((((((...(((((...))))))))))))).......	-3.4	1
SP_0856	803303	804325	+	804349	378	21.9003	24	UUGUAAAAGUAGAUUAAAAUAAACCAAAGGAGAUUCUUUA	UGAAAUAGAAAAAGUGGCUC	..........................(((((...))))).	-0.6	5
SP_RS04200	804381	805085	+	805097	73	3.67426	12	AAAAAGAACUAGAAAAACACAUUAAAUAAGGAAUGGUAUU	GAUCUUGAUAAAAUUUUAAA	................((.((((........))))))...	-1.3	4
SP_0860	806774	807418	+	807533	5053	157.789	115	UAAAACUCUAUAUCAGAGAAGCCUGAUAUAGAGUUUUUUC	UUGCUAGUUUUAGGAUUUUU	.(((((((((((((((......)))))))))))))))...	-19	6
SP_0861	807586	807816	+	807952	1113	22.5352	136	CUUCGGGUUCGGGGGUUCGAAUCCCUCUCUCUCCAUUUCA	UUAAUGGGGUAUAGCCAAGC	....((((((((....))))))))................	-9.4	3
SP_2245	807866	807946	+	807952	1113	19.8623	6	CUUCGGGUUCGGGGGUUCGAAUCCCUCUCUCUCCAUUUCA	UUAAUGGGGUAUAGCCAAGC	....((((((((....))))))))................	-9.4	3
SP_2246	807956	808027	+	808027	138	8.56552	0	UUUGACUCCCUCAUGCGUUGGUUCGAAUCCAGCUACCCCA	GUUCUUAGGUAAUAAUCAAG	................(((((.......))))).......	-5.5	1
srn218	808047	808148	+	808292	112	3.92074	144	GCUGAAGUAUUGACAGUUGAUGCGACUCAAGCUAACGUUG	CAAUCUCUGGAACUGGUGUU	(((((.(((((((...)))))))...)).)))........	-5.4	3
SP_0862	808189	809391	+	809442	113027	186.271	51	AAUUCACAAAAUCCUUUGUUUACUAAACAAGGGAUUUUUC	UGGCUCUUUGUCAACUGUAG	.......((((((((((((((...))))))))))))))..	-13.4	5
F31	810811	810862	+	810863	423	6.85946	1	UGUUUGGUCGCUUUUCAUUAUAGGUCAUAUGGGACUUUUU	UUCUACAAUAAAAUAGGCUC	.((((.((.((((........))))...)).)))).....	-4.2	5
SP_0865	811494	813149	+	813279	165	8.02769	130	UGAAGCCUGGAUGACUGGCCGCUAUAUUAUGGCAGCCUUU	UGGGCAAUUUUACUCUUUAG	................(((.(((((...))))).)))...	-9.1	3
SP_0866	813177	813371	+	813414	1421	42.5007	43	CUCAGCUUCCAGACAAAAUCAAAGCCUUUUAGGCUUUUUU	UUGUUAUACUAGAAAAGUAU	....................(((((((...)))))))...	-6.9	6
SP_0867	813521	814291	+	814333	63	3.5553	42	UCCCUCGUAUCUUUUAGGAGAAGUAAAUGACUAGAGAAAA	UAUUAAACUUUUUUCAGAAA	...(((.((.....)).)))....................	-4.2	0
SP_0868	814319	815581	+	815653	73	3.57153	72	CGCAAGGAUUUUCCAAUUUUAGAUCAGAUUGUCAAUGAUG	AACCUCUGGUCUAUCUGGAC	.((((.(((((.........)))))...))))........	-2.5	2
SP_0869	815592	816818	+	816926	176	8.70611	108	GAAGAUGCUGAGCAAAUCAGUCUCAACAAUCCGACUUGUG	GGGAUGUCAUCAACCUCUCU	...((.(((((.....))))).)).((((......)))).	-7.3	3
SP_0870	816805	817245	+	817344	45	2.82427	99	UGAAGAAAGAGUAGAACCAAAACCAAUUGACCUUGGUGAA	UAUAAAUUUGGUUUCCAUGA	.....................(((((......)))))...	-4	3
SP_0871	817299	818711	+	818742	272	10.0899	31	AGUUGGAUAAAAUUUGAUUUUAUACUCUUCGAAAAUCUCU	UCAAACCACGUCAGCAUCGC	...............((((((..........))))))...	-1.4	3
SP_0872	818942	820183	-	818912	3080	71.7471	30	GAAAUUAUAAAAAAUCGCGAUUUUAAACCGCGAUUUUUUG	AUACAAGUUCAUCUUCAAAA	.......((((((((((((.........))))))))))))	-12.1	6
SP_0873	820286	821395	+	821420	1777	77.5675	25	AGAAUUAGCUAAGUAAAAGUCAGGAGAACCCUGAUUUUUC	UUUACUGGAAGUGGCCUUUA	..............((((((((((.....)))))))))).	-10.4	5
SP_0877	824352	826304	+	826352	2756	66.8121	48	AAAAAUGAAAAGAUUGGACCGUUUGGUGCAGUCUUUUUCU	CUUCCCGAAAUGCCUGUGAA	......((((((((((.(((....))).))))))))))..	-15.4	6
SP_0878	826390	828693	+	828735	2101	49.0506	42	AAAAUAGCUUCUUUCCAAGUUUGGAGGGAAGCUAUUUUAG	UGGCUAUUGAUUGCUUUUAU	(((((((((((((((((....)))))))))))))))))..	-22.1	5
SP_RS04335	828738	829271	-	828692	124796	228.471	46	AAAUAGCUUCCCUCCAAACUUGGAAAGAAGCUAUUUUUUU	AUUGUUGUAACACUUUUCGA	((((((((((..((((....))))..))))))))))....	-15.6	7
SP_0880	829304	830446	+	830456	298	18.945	10	GAUUUACAAUCAAACUAGAAAAGUAAGAUAGGAGCAUUCA	UGCAGUAUUCAGAAAUUAUG	........(((..(((.....)))..)))...........	-1.1	2
SP_0881	830455	831669	+	831754	2050	27.3333	85	GUUUUUUCUCUAAAAACAGGUAAAAAACUAACUUUUUUUA	UUUUUAUGAUAUAAUGAUAU	(((((((.(((......))).)))))))............	-4.5	7
SP_RS12005	832650	833389	+	833531	13	13	142	AAUUGGUCAAGAGUCUUACGAGCAAUUGGAUGAGCCCUUG	CGCAAUAGCUUGACCGAGUA	(((((.((...........)).)))))((......))...	-4.5	2
SP_0885	833402	834568	+	834608	624	9.40704	40	AGAACUAUCGGAUUAAGGAAAUUAACUCCCUUAAUCCUUU	UGUUUUGUCUGAUAAAAAAU	.........(((((((((..........)))))))))...	-11.7	4
SP_0886	835075	836568	+	836582	138	11.1892	14	GCUGAAUUGGAAAAAUUACUCAAGUAGGGAGGUGGCUGUA	UGAAAAAAGUGAAGUUGGGG	..................(((.......))).........	-1.5	3
SP_0888	837762	837998	+	838107	56	3.63311	109	GAGAAAAUUCAAACAGUUAGUCCUUCUGCCUUAAAUAUGA	UUGUGAACUUACCAGAACAA	.............(((.........)))............	-0.5	2
SP_0889	837995	838408	+	838499	15851	205.561	91	AUUAGAAUUCUGUAAUGCAGAAACUGAUAUUGUCUCUUUU	UAUUGAUGAAUAAGAAAGUG	(((((..((((((...)))))).)))))............	-6.8	6
SP_0892	840125	843475	+	843499	21	2.1	24	CUGGAGAAGCGGCUUAAAUUCUAAAGUGAUUGCCAUGCUG	AGACUCAUUUAAAAUUAAAA	.......((((((....(((....)))....)))..))).	-5.2	2
SP_RS12015	843746	843864	+	843922	1907	67.043	58	AGUAUCAAGGGUUUUCAACACUUGAUACUAUGCGUUUUCU	GAUGUUAAAGACUUUCUACC	(((((((((.(((...))).)))))))))...........	-11.1	5
SP_0893	843981	844451	-	843871	2480	52.4829	110	AGUAUCAAGUGUUGAAAACCCUUGAUACUAUGCGUUUUGC	UUUAUCCUAGGAAGAUUUAU	(((((((((.(((...))).)))))))))...........	-11	4
SP_0894	844468	846741	-	844455	83	3.67205	13	CAGUCCAUGCUUACCUUACCUUGCUAAAAGGAGUUACAUU	AUUAUGAAUAAAUCAGAACA	..................((((.....)))).........	-3.2	4
SP_0895	847061	850189	+	850272	47	3.67826	83	AUCAGUAAGAAUGUUAAAAGAAAAAGGAGCAUAACCAAUA	UGAAACGUAUUGCUGUUUUG	..........(((((............)))))........	-0.6	1
SP_0896	850271	851278	+	851421	609	11.1202	143	AGAAAUCCGUGGUGGUAAAAAAUUCGGUGAGGACGGAUAC	UGGGGUGAAAAACUUGAUGU	....(((((((.(((........))).)....))))))..	-6.4	1
SP_0897	851337	852842	+	852900	19028	63.3654	58	AUCAUAUCCAGCUUUAGAGCUUGUGUGAUAGGCUUUUUGU	AUAGAGGGUAAGAAAUAGGC	(((((((..((((....)))).)))))))...........	-8.1	6
SP_RS04430	852934	853082	-	852850	107	107	84	UAUCACACAAGCUCUAAAGCUGGAUAUGAUAGGUUUUUAU	AUUUUUCUUAACGUACUGUG	(((((....((((....)))).....))))).........	-6	6
SP_0899	854646	855518	+	855555	37	2.78195	37	UUAAUAGUGUUAUGAUAUGACAGUAAUCUUAGGAUUUUUA	UUUCUAUUUUUGAUAAGUUG	....((.((((((...)))))).))(((....))).....	-4.3	5
SP_0902	856466	857182	+	857299	140	9.27152	117	GCUCUUUUUCUGUUAUUCAGAAGAGAACUUGUUCGUUUUU	AUCUUGAUUUUCUUAAAAAG	..((((((.(((.....)))))))))..............	-6.5	6
SP_0904	857311	858126	-	857244	6600	132.967	67	CUCUUCUGAAUAACAGAAAAAGAGCCUGUUCGUUUUUUGU	UAUAUGAAAAUUAGUGACUU	...(((((.....)))))(((((((......)))))))..	-6.5	7
SP_0905	858123	859028	-	858117	234	10.9753	6	AGUCUAUUCUCUCUUGAUUGGAGUUAUCCUAUGAUUCGAU	UUUUAGUUUUAGCUGGCUAU	..((((.((......)).))))..................	-3.7	3
SP_0906	859029	859160	-	858885	393	9.75218	144	CUCAGGGCUGAUUGAAGUUUAUAUCACACCUGACAAGGUU	UAUCAUUUUCUCCCUCGAAA	.(((((..((((..........))))..))))).......	-9.6	2
SP_0908	860839	862968	+	862983	328	17.755	15	UCCUAGCUCCAAAUGAAACUGACUGAUUACGUCAAGCAGG	UUUCACUAGAAGACUUCGGC	.(((.(((...........((((.......))))))))))	-5.4	0
SP_0909	862955	863404	+	863465	101	6.46252	61	GAUAUACUAGUCUAACCUAGCAGAAAGAGGAAAUAUCAUG	AACAGUAAGUUUUAUAAAAU	(((((.((..(((........)))...))...)))))...	-2.5	3
SP_0910	863462	863734	+	863811	59716	231.947	77	AAAUCAAUAGUCUAAACUGCUUGAUUUAAAGCUUUUUUAC	UUUUAUACUCAAUAAAAAUC	(((((((((((....)))).))))))).............	-6	6
F33	863736	863818	+	863907	2817	31.6969	89	UUAGUCGGCAAUGUGAAGUUGAUAUAGUUUGCACUUUGAU	UUUUGAAUAGUAUUAAUAAU	...((((((........)))))).................	-4.7	4
Spd-sr07	863740	863802	+	863811	59716	210.86	9	AAAUCAAUAGUCUAAACUGCUUGAUUUAAAGCUUUUUUAC	UUUUAUACUCAAUAAAAAUC	(((((((((((....)))).))))))).............	-6	6
SP_0913	865467	867455	+	867491	2766	71.658	36	UGUAAAAAAGAUACCUCGACUUCAAAAUCGAGGUAUUUCU	UGUAUUCUAAAUGCUGAAAA	........(((((((((((........)))))))))))..	-13.9	5
SP_RS04515	867497	868138	-	867456	264	24	41	AUACAAGAAAUACCUCGAUUUUGAAGUCGAGGUAUCUUUU	UUACAUUUGCACAAUCUUGC	....((((.(((((((((((....))))))))))).))))	-14.5	6
srn235	869494	869745	+	869805	9355	57.7528	60	CGUCAGAAGAUUGCAGAGCAGGUGAAAACCUGCUCUUUUU	UCAUGAGUCAACCUUUAGUU	..............(((((((((....)))))))))....	-15.7	6
SpF59_sRNA	869510	869591	+	869738	78	4.72727	147	AAUAUUUGCUACUAGAGAGUUAGGAAACAUCGGGAACAGA	CAUACUCAACAGAAACCAAA	....(((.(((((....)).))).))).............	-2.1	0
SP_0916	869869	871344	+	871470	84	5.53582	126	CAAUCGCUUAAUUUCUAUCAGCUUAUCAAAUCCUGCCUCA	AGCCUUUUCUGAGGAUUAGG	.....(((...........)))..................	-0.4	2
SP_0918	872282	873142	+	873263	48	2.68323	121	GAGAUUAUGAUUGCUAGCCGUACCAAGUCAAAAUGCGAUG	ACUUGAAAGCGAAGCUAGAA	.........(((((....................))))).	-2.8	2
SP_0919	873139	874398	+	874480	48	3	82	UUGGCCAAGUUAGAAGCUAAUUGCCGCAUUCUACAAUAUG	UACAAGAAGAGGCCGGUUGC	.((((..((((((...))))))))))..............	-5.9	2
SP_0920	874398	875525	+	875661	36	2.26667	136	CCUUUUCAAGGAAAGGCUGCUAAAAGAGCAUUUACUCAGA	UUAUCGAGACCAUAGCAGAA	((((((....)))))).((((.....))))..........	-6.2	2
SP_0921	875522	876607	+	876618	79	5.01346	11	CACUGUAUCACCCAACAAAUUCCAGAAUAGGAGAAAAAGA	UGAGAAAUGUAAGAGUUGCA	....................(((......)))........	-2.3	0
SP_0922	876617	877492	+	877617	163	6.3962	125	UUAUGAUUCGCUAUUCUUGUCUAUUGAUUAGUCCGUAUUU	UAAAAUAUUAGCAAAAAAGC	.........((((.((.........)).))))........	-2.9	4
SP_0923	877673	878482	-	877628	1551	74.2105	45	AAAAGCAAAUAGACAGAAGUUACUGCUAUUUGCUUUUUUG	CUAAUAUUUUAAAAUACGGA	((((((((((((.(((......)))))))))))))))...	-15.7	6
SP_0925	879029	879700	+	879737	6210	183.499	37	UUAGCUUACUAAAAUAAUGUCGGAACUUUCCGGCAUUUUC	UUUUUUCACAAAUAGUCAAC	((((....))))...(((((((((....)))))))))...	-11.2	4
SP_0927	879942	880850	+	880949	557	14.5553	99	CAAAUCCUAUAUCGUCCAGCAGAUUCCACUGGGUGAAGUG	CGCUCCUGGAUCCCCAAUUU	...........((((((((.........))))))))....	-6.5	2
SP_0928	880847	881308	+	881383	69	4.07595	75	UUGUCAGAUUUGUCAGAAUUAUCACGUAGUCUCGCGAAUG	AACAAAUUAAAUCAGGCCAG	.......((((((.(((.((((...))))))).)))))).	-5.5	1
SP_0929	881298	882185	+	882221	99	5.75727	36	AGUAAGAAUGAAAAAGAAAUUAACUAGUUUAGCACUUGUA	GGCGCUUUUUUAGGUUUGUC	......................((.(((.....))).)).	-0.2	3
SP_0930	882188	884071	+	884104	8112	134.453	33	AACAGUAGUAGAAAAGAAGGUUUUAGGGCCUUCUUUUUCC	UAUCAACUCUUUUCUAUUUC	..........((((((((((((....))))))))))))..	-12.6	5
SP_0931	884151	885281	+	885292	61	3.99065	11	GAAAUCCAACUACUUUUUACAGAAUUUUAGAGGUAAACUA	UGGUGAGUAGACAAGAACAA	..........(((((((...........))))))).....	-2.9	2
SP_0932	885291	886553	+	886610	48	3.36842	57	UUAUCGGUUUGGGGAAUAUGGGUGCUAGCUUGGCAAAAUC	UGUCUUGCAGACUAGGACGU	......................(((((...))))).....	-3	1
SP_0933	886557	887354	+	887379	1846	69.068	25	AGAACUAGGUAAAUAAGAGGUAGUUUUGACUGCCUCUUUU	AUGGUGGCUGAAAUGAGAAG	..............((((((((((....))))))))))..	-13.2	5
SP_0935	887470	888108	+	888188	44	3.24424	80	ACCGUUUUGUCCGUAUCUUAGAACAAGACCAGCUCAAUCA	CGCCUAUCUCUUUUCAGGUU	...(((((((.(........).)))))))...........	-6	2
SP_0936	888105	888995	+	889069	35	2.32365	74	UGUUUUAUGGACAAAAAAGAAUUAUUUGACGCGCUGGAUG	AUUUUUCCCAACAAUUAUUG	(((((...)))))...........................	-0.5	2
SP_0938	889355	890224	+	890259	3323	33.9082	35	CAAUAAAGGGAGACAGGAUGUAAUAAUUCUGUCUGUUUCU	GUUUAACUUAAUUAGUGAUG	......(((.(((((((((......))))))))).)))..	-12.9	5
SP_0939	890424	890969	+	891044	894	64.6265	75	UGGUUACCAAAGGCGAUAGAAGAAAAACUAUCGUCUUUUU	CUUUGCAAAUUUUUAAGAAG	........(((((((((((........)))))))))))..	-12.9	6
SP_RS04645	891078	891724	+	891760	10	10	36	CCUAGUUCAUGAUUGAUAAUGCCAGCAAUCAAAUUCAUUC	GUAAUCCGAAGCGUUUACGA	.........((((((..........)))))).........	-3.7	4
SP_RS04660	892494	892766	+	892854	48	48	88	GAAAAUGACUAAACAGGGAAGUUUGCCUUCUUCCCUUUUU	UUGUUAUACUAGUAGAAGAA	..............(((((((........)))))))....	-10.3	5
SP_0943	892924	894294	+	894361	70	4.96063	67	CUAUAAAAAUCUUAGAAAUUGUGAUAAAAUAGGUAGGAUG	AAAGAAGGAGAGUGAAAAUG	........((((((...(((.......)))...)))))).	-3.2	2
SP_0944	894378	895115	+	895191	438	16.5737	76	AAAGAGAGAAUGACCCAGUCUCACCAAUCACUUGCUCGUG	AAUUUGGUGGUAUCCGUGCU	.....((((.((...)).))))......(((......)))	-3.6	3
SP_0945	895124	895681	+	895727	10004	56.8737	46	AACAGAAAAACUCAGUUGGCAUUGCUGGCUGAGUUUUAUU	CGAAAGAAGGAAAUAUGAAU	......((((((((((((((...))))))))))))))...	-16.9	6
SP_0946	895741	896595	+	896722	294	16.2207	127	CUCGCUUUUGAAGAGUCAGCCUUUCCAAAACACACAGAUG	AUUUUGAUGAGGUCAGUCGC	.....(((((.((((.....)))).)))))..........	-3.1	1
SP_0947	896604	896819	+	896914	42	2.61017	95	AAGAAAUAAAAGGAUUAGAGAGGUUCUUUAUUUGAAGGAA	CAUUCAAUAGACAUUCAACU	...(((((((.(((((.....)))))))))))).......	-4.5	1
SP_0948	896905	897873	+	897962	102	4.52398	89	AAAAGUGUUAUACUAUUUUUAUGGAAACAGUAUACGACAA	AGCACAAAAACUUAACUCAA	....((..((((((.((((....)))).))))))..))..	-6.5	1
SP_RS04695	897906	898367	+	898426	600	23.0631	59	AUUUGACGACACAUAAAGUCUGUCAAAUGGCCUUUUCUGA	CGGACAUACGCAUGAUUUUA	((((((((((.......))).)))))))............	-8.5	5
SP_RS04700	898379	898756	+	898779	59	3.05502	23	AAUUAUGAAGUGAACUAGAUUCCGAACAAGUCUAAUAUAC	UUUUGAGAGAGGAAAAUCCA	...............((((((.......))))))......	-2.5	3
SP_0950	898939	899439	+	899503	1441	57.7629	64	UUGGAAUUUGUUUUGGAACAAUUAUCAGGAUUAGAUGAUG	UGACUUACCGUUCCAUGAUG	........((((....))))((((((.......)))))).	-3.3	2
SP_0951	899442	899669	+	899809	269	9.15811	140	ACGAAGUAAAAAAGAAGUCUGCUAAGGCCCUGUCUUUGCA	CGGGUAAAAUUUUAUAUAUA	.....(((((..((..((((....)))).))...))))).	-5.7	4
SP_0953	901345	901914	+	901946	2790	35.4125	32	AAUAAAUAAGCAGUUGAAAAGAAAUUUUUCGACUGUUUUU	UCUUCCUCUUACGAAUAAUC	.......(((((((((((((.....)))))))))))))..	-13	6
SP_0956	905035	905223	+	905257	30	2.21591	34	CUAUUAAUUCUUAAAGAGUGAGAAAAAGGAGGGCUAGAUA	UGUUGCAGCUUACUCAUGUG	.......((((((.....))))))................	-2.6	2
SP_0957	905256	905843	+	905869	95	6.30859	26	AUAGAAGAGGUUUAGUUUAUGAAAGAUGUUAGUCUAUUUU	UAUUGAAAAAAGUUUUCAAA	(((((.((.((((..........)))).))..)))))...	-2.1	6
SP_0958	905847	907031	+	907101	2327	107.919	70	AACUAACAUAGAGAGGGAAUCAACUUGAUUCUCUCUUUUU	GAUUCGAAAACCAAACCAAA	.........(((((((((((((...)))))))))))))..	-15.1	6
L20_leader	907195	907326	+	907469	51	3.31707	143	CUAGGUAUCAAGCCACUCAGUGAAGCGCAAGCUUUGGCUG	AUAACGCUAAUGUUGACCUA	...(((.....)))...((((.((((....))))..))))	-9.4	4
srn239	907201	907415	+	907542	153	5.96402	127	CCCAAGCCAAACCGCCUGUUGCAAAAAUUAUGGACUACGG	UAAGUUCAAAUUUGAGUACC	...........(((...(((............)))..)))	-1.8	1
F34	907218	907312	+	907319	41	2.81143	7	CAUAACGUGCGGGCUUGUAUAUUUACAAGUCCGCUAUUGU	UUUUCUCUAAUAAAACAAAA	........(((((((((((....)))))))))))......	-18.5	4
SP_0959	907315	907872	+	907909	679	11.5958	37	AUAAUUGUCAGAAAGUUAAAUAAAGGAGAAAAAAUCAUGC	CAAAACAAAAAACACACCGC	........................................	0	2
SP_0960	907905	908105	+	908125	653	9.29264	20	AUGCUUACUCGCUUGAAAUAAUAGCUUGACUGUAAGUAAA	CAAUUCUAGGAAAUAUUUGG	.((((((((((((.........)))..))..)))))))..	-6.6	2
SP_0961	908157	908516	+	908555	65601	651.107	39	AACAACUGAUGAGACUGGAACAGGAUUGUCCAGUCUUUUU	UAAAAUAAAGGAGAAAGAUA	..........(((((((((.((....)))))))))))...	-13.3	6
SP_0962	908574	908954	+	909000	6156	105.818	46	UGCAAGUUAAGUAGAAUAUUCGUUUUCUACUUGACUUUUU	UUAGCUGAAAGAGUAUACUA	...(((((((((((((........)))))))))))))...	-15.2	5
F35	909029	909169	+	909169	164	13.6667	0	CGAUUUUAACUGAGGCCUUGCACUAGCAAGGUCUUUUCUU	UAUCUGGUCCCCUUAAAAUU	...........((((((((((....)))))))))).....	-15.1	6
SP_0963	909204	910004	+	910035	48	3.07692	31	UGUAUUAUAAGGAGAAAAUUAUGACUACAAAUCGAUUACA	AGUUUCUCUACCUGGUUUGG	((((((((((........)))))).))))...........	-4.5	2
SP_0965	910995	913028	+	913103	1501	42.3812	75	GUUAAAAAUCCUGAUUUCAAGUAAAAUCAGGAUUUUUUCA	UGGAUGCAAUUUUUUUGGAG	...((((((((((((((......))))))))))))))...	-14.7	6
SP_0966	913089	914771	-	913063	1383	14.0228	26	UGAAAAAAUCCUGAUUUUACUUGAAAUCAGGAUUUUUAAC	UUACUAUUCACUCAAAUCAU	...(((((((((((((((....)))))))))))))))...	-16.4	5
SP_0967	914849	915346	+	915490	1262	51.5242	144	ACGGCUCUAGUGGUCAUCCUUGCAGGUUUUGUUUUUCAGG	UGUCACGAAUCGAAUGGCUC	..((((.....))))...((((.(((......))).))))	-2.5	4
SP_0968	915327	915722	+	915724	66	3.04615	2	UUGAUUUUUCUCCCACGAAUCUGGGAUUUAUUAUUUUAAA	CAGUAAGAGGAAAUUAUGAC	..........(((((......)))))..............	-6.2	4
SP_0969	915739	916638	+	916669	3478	92.9476	31	AGAAUACUAAGUAGAGGUAGGCUCAUGCCUGCUUCUUGUU	UUUACAGAAGGAGGACUUAU	............((((((((((....))))))))))....	-16	6
SP_0970	916687	917511	+	917658	52	3.48325	147	CCACCAACUACAGAAACCUGGUGGUCGUCUGUUUGAGGCU	CUAGUACAGCACUUUGGGCA	((((((............))))))..((((.....)))).	-10.7	3
SP_0971	917511	918116	+	918202	65	3.38803	86	AGGAGCCAGUAUUUCUUUGGUUGUACCUUUUAUGCCCAUC	UUCGUGGAAAAUCUAGGUGU	(((((((((.......))))))...)))............	-5.4	2
SP_0973	919302	919451	+	919478	107	4.58571	27	UUGAAUCUAAGUAGAUUUUAUGGUAAAAUAAUAGGGAUUU	UAAGGAGUUUGAUAUGUAUA	..((((((......((((((...)))))).....))))))	-3.7	3
SP_0974	919491	919724	+	919760	4576	147.129	36	GAUAAGAAAAUAAUGGGCAGGACUAGGUCUUUGCCUCUUU	UUAUUUUUAAAGGAUGUUUG	..............(((((((((...))).))))))....	-9	4
SP_0975	919826	922180	+	922258	165	6.96234	78	GAGGCAGGGAUGGUCCUGACUGGAACUGAAAUCAAGAGUG	UACGAGCUGCUCGAAUUAAU	.((.(((((....))))).))...................	-6	1
SP_0976	922143	922610	+	922678	141	5.7703	68	GUUGCCUAUAAACGCAUGCCUUUGUGGAAUAAACAAACAA	UGCCUGAAGCUGUUCAGCAA	(((.........((((......)))).........)))..	-4.8	0
SP_0977	922626	923486	+	923524	10004	167.763	38	UAAACACACAUGAAGAUUAGGAAUUUUCCUGAUCUUUUUU	CUUUUUUACGAAUGAUAUAG	...........(((((((((((....)))))))))))...	-12.8	7
SP_0979	924531	926333	+	926463	127	5.73105	130	AAAAGCAGGUCACAGGUUUCUUGAAAGAAUUGGAAGACUU	UGCCCGCAAGGAAAAUAUUC	......(((((......((((....))))......)))))	-4.3	2
SP_0980	926335	927048	+	927116	99	5.36146	68	UAAAAUAGAUAGAGUAACACUUAUCUCAAAGGAGUAGACA	UGAAGAAAAAAUUAUUGGCA	......((((((........))))))..............	-2.5	1
SP_0981	927115	928056	+	928103	3944	34.9004	47	UCAAUGAGUCAGGGAAAAAACUCGACUUCAGGAAAAAAUG	AAGCAAACAUUCCCACAAUA	((...(((((.(((......))))))))...)).......	-6.7	1
srn249	928077	928215	+	928222	103252	342.513	7	AGGAUUUAGUUCUGUAUUGCACAGAGCUAAGUCCUUUUAG	UUUUAUCUUAAUUCUCUUAU	(((((((((((((((.....))))))))))))))).....	-20.2	4
SP_RS12060	928794	929024	-	928652	177	13.6154	142	AAAGUUAGACAGAAAAAAUCUAACUUUUGGGGUGUUUUUA	UUAUGAAAUUAACUUAUGAU	(((((((((.........))))))))).............	-6.1	6
SP_0984	929276	929896	-	929167	2199	69.6313	109	GCCUCGUAAAAAGGUAUUGCAACUUGCCAAUACCUUUUUG	AUAUGAACACGUGUCUUCUC	......(((((((((((((((...)).)))))))))))))	-13.1	5
SP_0985	929896	930378	-	929895	72	4.22383	1	AAGGCAGACUUUGUAGAUAUUUUGGAGGACAUCAAGUAAU	GAAACUCUACUUUGUCCGCC	........................................	0	2
SP_0986	930378	931220	-	930260	81	4.53404	118	AAAUCAAUGCCCUAGAAGGAGAGCUUCCUCAAGGUUAUGA	ACGAGAUCAGAUUUUCAAAA	......(((.(((.((.(((.....))))).))).)))..	-6.9	3
SP_0987	931315	932115	-	931286	3977	66.9207	29	UAAAACCUUAAAAGCAUUUGUUUAUCAUUUGCUUUUUCUU	UUUGUGUCUGAUUGUGAUAC	.........(((((((..((.....))..)))))))....	-7.7	7
SP_0988	932259	933638	+	933656	120	4.85686	18	CUCAUCAUCCUAAGAACCAGUAGGAGCCUAUCAUGGAGUU	UGAAGAAAAAACGCUUAGCC	.......(((((........))))).((......))....	-5.5	3
SP_0989	933648	934193	+	934206	538	14.7759	13	UCAGUAUUGGGAGUUGCAGAAAAAAUAGAGGAGGUCAGUA	UGGGUAAAUCUUUAUUAACG	..........((.((.(............).)).))....	-1.3	2
SP_0990	934205	934519	+	934539	72	4.45361	20	UUAGCAAUGAAACUUUUGUAAUAGAAAAGGAAUUGAAAUG	AAAAUAGGAAUUAUUGCUGC	....((((....(((((.......)))))..)))).....	-3.8	3
SP_0991	934536	935228	+	935308	57	2.97909	80	AAGUAAAGAAAAGCUAGAAAACGUUUCAGAGGAUAUUAUG	AGUAUUGAAAUGACCGUCAG	.(((........))).........................	-0.1	4
SP_0992	935305	935796	+	935842	18336	399.104	46	GAGCUGUUUAGGUUAAAUGCUAACCUGAUGGCUUCUUUUG	UUUGUGAAUAGUAUAGUUGA	((((((((.((((((.....))))))))))))))......	-12.7	6
SP_0994	936487	938256	+	938323	9522	343.883	67	UCCCAUGAUAGGUAAGUAUUCUUGUGAAUGCUUGCUUUUU	UGUGGUUGCAAUCCGUUUAC	.........((((((((((((....))))))))))))...	-13.6	6
SP_RS12065	938470	939112	+	939176	635	26.1471	64	UCGAUCAGGACAGUAAAAUCGAAUUCUAACAAUGUUUUAG	AAGUCCAUAUGUACUAUUCU	(((((............)))))..................	-2.1	5
SP_0997	939279	939479	+	939484	38	2.24731	5	CAAAAAGCUCCGGAAGAUAGUGCCUUGACAGAGUAAGGUC	UGCAUACUGCAGUAGAGUCU	.....................((((((......)))))).	-4.7	2
SP_RS04950	939521	939925	+	940008	1086	64.4237	83	CACAAAAGCAGCGAUGAGUAAUCCUUGUCGUUGCUUUUUG	GCUAUUUUGGGGGAUAAGAU	...(((((((((((((((.....)))))))))))))))..	-18.1	5
SP_0999	940156	940863	+	940875	38	2.94366	12	UAAAUGUUCUAGCUGGAAUUUUUGAAUAAAGGAGGACAAA	UGAAAAAAGUAAUGUUUGCU	....((((((..((...............)).))))))..	-4.3	0
SP_1000	940874	941431	+	941578	5655	55.6541	147	CAGUGGAAAUCCGUCUUAGACUAACUUCCACUGGUUUUCU	UUUUCUUGAUAUAUAAGGGU	((((((((....(((...)))....)))))))).......	-12.6	5
SpF36_sRNA	941435	941487	+	941578	5655	232.511	91	CAGUGGAAAUCCGUCUUAGACUAACUUCCACUGGUUUUCU	UUUUCUUGAUAUAUAAGGGU	((((((((....(((...)))....)))))))).......	-12.6	5
SP_1001	941805	943196	+	943238	3922	141.079	42	GUGAAAGUCUAUUGAGUUGUUGACACUCAGUAGAUUUUUA	UAUGUGAAAGAAAUUUCAAA	.((((((((((((((((.......))))))))))))))))	-16.5	5
SP_1003	944264	946783	+	946840	1788	70.8531	57	UAUUUUAUGGAGAAGUAACCUUUCGUGUUACUUCUCUUUU	UUAGAAAAACGUAACAGAAA	........((((((((((((....).)))))))))))...	-13.9	6
SP_1004	946993	950112	+	950197	5121	101.191	85	AAAAGUUAGAAAUAAAACUCUGACUUUGGGAGAAUUUCAU	UUUAUUAUUAAUAUAUAAAA	.(((((((((........))))))))).............	-8.5	4
trn0485	950119	950196	+	950197	5121	48.0094	1	AAAAGUUAGAAAUAAAACUCUGACUUUGGGAGAAUUUCAU	UUUAUUAUUAAUAUAUAAAA	.(((((((((........))))))))).............	-8.5	4
SP_RS12070	950338	950901	+	951039	88	8.8	138	ACUAUAGUACCACAUGGUGGUCACUAUCAUUUCAUUCCUG	AGAGUGACUUGUCGGCAGGU	...((((((((((...))))).))))).............	-8.6	3
SP_1006	951620	951841	-	951586	17	17	34	CUUUAAUUUUAAAGUUUAGGUGUCAAGACCUCUUUUUAGU	GUGCCCAAAAUUUAGAGAAG	.....(((..((((...((((......))))))))..)))	-4.6	6
SP_1007	951806	952435	+	952475	1448	137.905	40	AAAAGAAAGGCGAAGUAGCUGAGCUACCUCGUCUUUUUAG	CCUUUAUAAGCUACGAUGCC	...((((((((((.(((((...))))).))))))))))..	-17.5	5
SP_1008	952471	953694	-	952437	10062	123.683	34	GGCUAAAAAGACGAGGUAGCUCAGCUACUUCGCCUUUCUU	UUUAUUCUACUGGUUUUUCU	......((((.(((((((((...))))))))).))))...	-14.7	5
SP_1009	953849	954943	+	954982	633	28.1333	39	AAAGAAAAAAGGAUUUAGCUUUGCGCUAGAUCCUUUUAAU	CGAUUAUUUUUUCUCAAGGA	......(((((((((((((.....)))))))))))))...	-16.5	5
SP_1010	954985	955362	-	954945	14602	126.088	40	UCGAUUAAAAGGAUCUAGCGCAAAGCUAAAUCCUUUUUUC	UUUACUCUUUGGGUAACUUG	......((((((((.((((.....)))).))))))))...	-13.1	6
SP_1011	955444	955875	-	955361	14	14	83	GGAUACAAUGAAACACGAAACAUUGAAAGGAAAACAGUAU	GUUAAAAAAUCUAAAAUCGU	.....(((((..........)))))...............	-1.9	2
SP_1012	955998	956507	+	956544	15173	165.679	37	AUAGAAGAAGAUAAGCUAGGUAGUUUUUACCUGGCUUUUU	CCUAUGGAAAAUUUCUAAGG	............((((((((((.....))))))))))...	-13.2	5
SP_2248	956607	956679	+	956681	35	35	2	GUAAGGAUGAGGUCGCCGGUUCAAUCCCGGCAAUUAGCAU	GAUAUGUAUAGGGAAACUCU	......(((.(((.(((((.......))))).)))..)))	-9.1	3
asd	956780	956922	+	956922	62	62	0	AAGAUGCCUCUUAGUCCCUAGUCUAGCGACUGGGAUUUUU	AUUUUCCAAAAAAUGAUGAA	((((....))))((((((.((((....))))))))))...	-12.1	5
SP_1013	957021	958097	+	958134	3482	97.8965	37	AUAGUCAUAUCGUUUAGGAGUUCAGAUGAACUCCUUCUUU	GAAAUAGAGAGGUGUUUUCG	...............((((((((....)))))))).....	-11.3	5
SP_1014	958153	959088	+	959177	2095	82.2336	89	AGCUAAGCUCGAGAAAGGACAAAUUUUGUCCUUUCUUUUU	UGAUAUUCAGAGCGAUAAAA	..........((((((((((((...))))))))))))...	-14.8	7
SP_1016	960558	961931	-	960520	934	34.3966	38	AAGAAAAAUCCAUGAUCCUUCAUUCGGUCAUGGAUUUUAG	GUUCUAUAAUAUUUGUAGUG	....(((((((((((((........)))))))))))))..	-16.2	4
SP_1017	962068	962250	-	962036	4063	120.245	32	CUAAAUAAGCUAGCUUAAGCAGAAUUGCUUAGGCUUUUUC	AAUCUCCAAGUAGCAUUCAU	...........((((((((((....)))))))))).....	-12.9	5
SP_1018	962374	962973	+	962973	89	4.65698	0	CAAUGAUAACCUCUAACAAGGAGCAAAACUAUGACAAUUG	AACUAAGAGAUGUUACAAUG	..........((((.....)))).................	-2.1	2
SP_1019	962963	963442	+	963555	211	9.29405	113	AGUGACCCUGAUGUCGUUUCAGACACCAAGCGUUUUAUGG	AGCUUUCAAAAGAAGAAGCU	...((((.((.((((......)))).)).).)))......	-6.3	5
SP_1020	963452	964531	+	964612	6510	150.974	81	GAUAAGACAAGGAGAGGAAGCGGAAAGCCUCUCUUUUGUC	UAUCGUAGUCUGAAAAAUCU	.....((((((((((((..........)))))).))))))	-13.8	5
SP_1021	964531	965370	+	965413	424	10.1568	43	AAGAGUUGGAAAAUGGUGGAGCUGUCGUUUUGCCUACAGA	GACAGUUUACGGUCUCUUUG	..............((((((((....))))))))......	-7.4	1
SP_1022	965327	965956	+	966059	172	6.3283	103	UGGGUUAUACUUUUAGUCCAGAGGAAACGGCUAGCCAACU	AGCUAGACUGUCUCAGGAUU	..(((((..(......(((...)))...)..)))))....	-4.8	1
SP_1023	965958	966389	+	966431	2747	50.5062	42	UUGAUUUUCUUAUUGUAAAAUCAAACUAAUGGACUAGUCA	CACAAUAAAGGAGAAGACCU	(((((((((.....).))))))))((((......))))..	-5.4	2
SP_1024	966451	967707	+	967724	376	6.73508	17	GCCUUCCCAUUAUACGAGGACUAAAACUUUUAUGGACAUU	UAUAUUAAGAAAGCCAUUAU	......((((.....(((........)))..)))).....	-3.7	3
SP_1025	967682	968689	+	968734	10451	67.3823	45	UAAACGAAUUCGAAGAGUGCUUGUACUAGCAGUCUUCCUU	UUUGCUGGCUAUAAAGCUUA	...........(((((.((((......)))).)))))...	-12.7	5
SP_1026	968689	969303	+	969313	1720	33.4793	10	AUGUUUCACUCUCUUUUCAACAUCUGGCUAGACCAGGUGU	UUUUGUUAUAAGUUUUCUUU	...................((((((((.....))))))))	-9.9	2
SP_1027	969377	970351	+	970400	88213	353.711	49	AUGGUAUAAUGGAUGGUAACCGUAACGUUGCCGUCUUUUU	UGUCGGCCAAUAGAAAGAGA	..........((((((((((......))))))))))....	-12.9	6
SP_1029	970425	972056	+	972057	40	2.65446	1	AGCCAUCAUGGAUGCUUUGAGACACUUCAAAAUGAUUUAA	UAGAAAAGAAUGACAGUAUA	...((((...)))).((((((....)))))).........	-3.2	4
SpF61_sRNA	972327	972384	+	972468	1740	81.8824	84	AAAGUUUAAAACUCAAAAAAUAAAUAGUUGGUGUGCUGCU	UACAAUAUCCAUUUUAAUAA	........................((((......))))..	-1.2	3
SP_RS12075	973017	973285	+	973331	26	2	46	AAUAAAAACUAGAUCCUUUUUUGAAAAAAUUAUAUUAUUA	AAUUUGUAACUGUAUCUAUU	........................................	0	5
SP_1032	973406	974431	+	974480	5316	94.7963	49	UAAACCUAGGCAUAAUUUUUAUAAUCUGCCUAGGUCUUCU	UAUUACAAUAUUUUUGUCAU	...(((((((((..(((.....))).))))))))).....	-13.5	4
SP_1033	974409	975428	+	975543	30	2.41935	115	AUAAUCAGUCUAUCAUUUUUCAUUUUACUUAUCGGAGAUG	AAAGUUAUUCUUUUUCAACU	....................((((((........))))))	-1.6	1
SP_1034	975428	976435	+	976436	61	3.93111	1	AAUAUACUUACUAAUAAAAAUGAACAGGAGGAAUAUAUAA	UGAAAGGUCUGUGGUCAAAU	.((((.((..((.............))..)).))))....	-0.4	3
SP_1035	976435	977229	+	977322	1261	72.7018	93	AAAGUUAGGCCAAAAAACUAACUAAAGGAGGUCAGUUUUU	UAAUGGCAAAUACAGCACAG	..((((((.........)))))).................	-5.2	5
SP_RS12080	977617	978006	+	978052	57	3.60131	46	GAGAGGGAGAGAUAGAUAAAAAGUCCACCCCCAUUUUUUA	UGGAGAAUUCAAAAAUGUAA	..(.(((.(.(((.........)))).))).)........	-4.3	6
SP_1038	978131	978286	+	978378	69	3.67338	92	CAAAGUAUGCCAGAGAUAAAAAAAUAUAAAUAUGACACUU	UAAAGGCGAUUAGAAAAUUA	........................................	0	3
SP_1040	979223	980902	+	981027	80	2.7451	125	AGCAAAGUAAAAGUAGAUGUUCAGCCAAUGCGACGAGGUG	AGACCGAAGGUCGAUAAGGU	.......................(((..........))).	-0.8	1
SP_1042	982058	982246	+	982269	594	20.4828	23	AUUUACUCAAAAAAAUAAGAGCAAAAUUGCUAUUAUUUUU	UACAAAUUGGUGUAACACUA	..........((((((((.((((....)))).))))))))	-7.3	7
SP_1045	984090	984974	+	985006	1621	85.3158	32	GAGGAUUAGUAUAUAGAGAAAGCCUUUUUUAAGGCUUUUU	GUAUACUUUAAAAGAUAGUU	................((((((((((....))))))))))	-10.7	5
SP_RS05180	985690	986877	+	986964	12	12	87	UAAUAAGGCUAGUUACUAAACUUGUAAAGGAGAACUUAAA	UGAAUUGUAGAGGACAUGAA	..(((((..(((...)))..))))).(((.....)))...	-2.7	2
SP_1047	986963	987280	+	987301	27	27	21	CAGGGAGUGGAAAUUUAUAACCUGAAAAGUGGAAUGAAAC	UGCAAAGCAGCUUUAUAAUG	((((..((((....))))..))))................	-6.6	1
SP_1052	989317	990473	+	990514	2926	175.06	41	AGUCAGAAAAAGUAGGUUAGAAAUUUAGCCUACUUUUUUC	UUUGUCCGACAGGCAUAGUG	.....(((((((((((((((....))))))))))))))).	-16	6
SP_1057	993954	994820	+	994852	483	10.2766	32	ACAGAAUAAGGAAUACGGUGUUCUAGUGAGCAUCGUUUUU	UAAAUCUAAUUUGAAUACAA	..........(((.(((((((((....))))))))).)))	-12.2	6
SP_1059	995411	995662	+	995787	2678	84.2801	125	GGAAAUCUUAGUCAGAGGUUUCUGAUUAAUUCAUUUUUUA	UAUAUUAAGAGUGAUGUGAA	.(((((.(((((((((....)))))))))...)))))...	-8.8	6
F62	995726	995787	+	995787	2678	36.7569	0	GGAAAUCUUAGUCAGAGGUUUCUGAUUAAUUCAUUUUUUA	UAUAUUAAGAGUGAUGUGAA	.(((((.(((((((((....)))))))))...)))))...	-8.8	6
SP_1062	997550	998467	+	998534	14	14	67	GACUUAGGUUUAAGAGGUCUAGCGAUUAUUGCUAAAAAUG	AGAUUAUUGCUUUUUUUAGA	(((((.........)))))((((((...))))))......	-6.7	2
SP_1063	998464	999264	+	999287	116	116	23	AUACUGAUAGAAAGAUAAAAGUUGGGUCAUCCAACUUUUU	UGUUGUCUCCCGAAAACCAC	................(((((((((.....))))))))).	-9.1	5
SP_1064	999422	999895	+	1000025	92	92	130	AGCCGCAGAACAAACCACCAGUUCACACUGGUGGUUUUGA	UUUAAAAAACUUGAUACAUA	...........(((((((((((....)))))))))))...	-15.9	4
SP_RS05265	1000152	1000373	+	1000415	77	77	42	CUCCUCAAUUUCAUAGAGUUUGAAAAUGAGUGAGAUUUUU	UAUUUGCCCUUUGACAACUG	(((((((.(((((.......))))).)))).)))......	-11.3	5
SP_1067	1001278	1002507	+	1002528	200	7.7266	21	UGAACCUUCUGUUGAAGUAGGAUAAAGAAAGGAUAGUUUA	UGUCUCUUCAAAAAUUAGAA	....(((.((.....)).)))...................	-3.2	4
SP_1068	1002527	1005223	+	1005254	110	4.16882	31	UUCAGGUUGAUAAUUUUCAAGAGUGAAUGCUAAAAGUGAA	UAUCAAAAAAAUUCUAAUAG	((((..((((......))))...)))).............	-4.1	1
T-box	1005306	1005523	+	1005548	14949	170.127	25	CAUCGACGUCCUCACACAAGUUUUUUGUGUGAGGAUUUUU	UUGAUGGAGGUUAGUAUGGA	.......((((((((((((.....))))))))))))....	-18.1	5
SP_1069	1005636	1006640	+	1006673	973	50.2194	33	UCGAAUAAAUAAGGUAGGGAGGAGGAGACUCUUCCCAUUU	UUUAAAAAGAUGAAUAUAGA	................((((((((....))))))))....	-14.6	4
SP_1072	1008420	1010180	+	1010184	138	5.27264	4	GGAACGUUUAAUUUCCCAAAAGAGAAGAAUGGAGUAAUAA	UGGCAACAAAACAAAAAGAA	....(((((..((((......)))).))))).........	-2.8	2
SP_1073	1010183	1011292	+	1011335	167	6.68803	43	GUGAGGAAAAUAUGGCUUAUACAGAAGAGCAAAUUGAAAA	CAUCAAAACACGGAUUUUAA	..............((((........))))..........	-3.2	2
SP_1074	1011306	1011635	+	1011710	5679	152.182	75	CGAGGAAAUUUCCCCUCUUUUCCUCUAGUCUCUCCUUUCU	UUUGCUGAUUUUAUUCAAAG	.(((((((..........)))))))...............	-8.1	5
SP_1075	1011777	1012793	+	1012810	250	11.9472	17	CAAGCCGCUUUAGGGAGAAAGUAAAAAGUGAGGUAAUCUA	UGCGAAUUGGUUUAUUUACA	...((((((((.............)))))..)))......	-3.1	3
SP_1076	1012809	1014134	+	1014168	763	24.1512	34	AGAAUAGAAAGAGGAACAGCUAUGAAAAAAACAAUUAAUG	AGAAGCGGUCGUGAUAAAAA	........................................	0	3
SP_1078	1014400	1014534	+	1014580	2997	134.834	46	AUUCAAGAAAAUUUAGUGACUGGGAUUUCCCAGCCCUUUU	UUAAAGUGAGAAGAAAUAAU	...................(((((....))))).......	-7.8	4
SP_1079	1014598	1015908	+	1015949	80	3.81194	41	GAGACUGGUAUGGGAGAUAAACCGAUAUCUUUCCGAGAUG	CGGAUGGUAAUUUUGUUUCC	(.((..(((((.((.......)).)))))..)))......	-7.7	1
SP_1080	1015918	1016076	+	1016120	5252	99.8479	44	AGCUAAAAAAUCCCGUGCCUCAUCAGACACGGGAUUUUGU	GGUACGACAGGCAUGUAUAG	......(((((((((((.((....)).)))))))))))..	-16.2	5
SP_1081	1017219	1018478	+	1018564	4231	168.119	86	UCUUUUUUUGAAACGGAUCGCUUGUAUUUGCGUCCUUUCU	UUUUUAGUGAUAGUCAGGAC	.........((((.(((.(((........)))))))))).	-10.2	5
SP_1082	1018494	1019045	+	1019173	204	11.6943	128	UGAUGGAACAGCCUAUCGGGCUAUUAAAGAAGCUGAAAAC	CGUGGAAUUGUGGAGACCCG	((((((......))))))((((........))))......	-7.3	1
SP_1083	1019038	1020315	+	1020348	176	9.97481	33	UUAAUUAGAAACUAGGAGAAAAGAUGAUAACAUUAAAAUC	AGCUCGUGAAAUCGAAGCUA	......................((((....))))......	-0.5	3
SP_1084	1020331	1021191	+	1021302	2825	55.9011	111	AUUGUAUCAAGUGUUAGGGGCUGAUAUCAUGCGUUUUUCU	GCUUUUAAGAUUUUUUCCAA	...((((...(((((((...))))))).))))........	-5.2	6
SP_1087	1022565	1024856	+	1024898	1649	122.798	42	UUUCCAUCCUUCUCACGAAUAAUAAAGUGAGGAGGAUUUU	UAUGUACAGUAUUUCAUUCC	.....(((((((((((..........)))))))))))...	-16.4	4
SP_1089	1025576	1026265	-	1025567	51	3.70909	9	ACUCUUUGACUAUGUCGUUAAUGAACUUUAGAUUAAAUCU	GUCUUUUCACGAUAACUAAA	..((.(((((......))))).))................	-3.5	4
SP_1090	1026283	1026924	-	1026266	58	2.82718	17	ACUUCAUGCGAAAAGAGGAUUAGAAAGCGAAAAUCAUUUU	AUGAAAAAACCAGUUAUUGG	.((((.........))))......................	-1.3	5
SP_1092	1027007	1027258	-	1026988	7790	169.348	19	GAUUUUUUACAUCAAAACUAAGAUUUUUCUUAGUUUUUUC	UUAUUUUUGUUGAUUUUUUC	.............((((((((((....))))))))))...	-9.4	6
SP_1093	1027230	1027577	-	1027146	60	3.26463	84	AGCGUACUCUCAAGUAUGAGGAUCAUGAGGCUCUCAUGUU	GACUUUGUCAGGAUGUGUAA	..((((((....)))))).....((((((...))))))..	-9.4	4
SP_1094	1027582	1028697	-	1027530	44	2.49457	52	UGAAAAAAUCAUUCAGUUAAAAAAUUGUCGUUACGAUUAC	ACUCUUAGCCCUUCUGUUAA	......................((((((....))))))..	-1.8	2
SP_1095	1028707	1029666	-	1028696	157	8.74826	11	CACUCUUUGCCUACAAUAAAAAGAAAUAAGGUGAUUCUUU	GAUUUAUUUGGACAAUGCUG	......((((((................))))))......	-2.7	5
SP_1096	1029779	1030348	-	1029645	12	12	134	UACAGAGGACGGUCUAUAAUGUCAGAUAGAAAAAACAUGA	AACUUUUCGCACUCAACUCU	.......((((........)))).................	-2.9	1
SP_1097	1030476	1031147	+	1031285	101	4.5755	138	ACCAAUCCGGAUAUUGUCAUUUCCAUUGGCGGGGAUGGUA	UGCUCUUGUCGGCCUUUCAU	((((.(((.....((((((.......))))))))))))).	-9.5	2
SP_1098	1031131	1031949	+	1032058	28	2.17964	109	GGAUUGCUGGCCAAGAUUAAGUUUCGAGGUGGAGCUAUUC	UGGUCAAUAAUCAACCGCAA	((((.(((.(((..((.......))..)))..))).))))	-8.8	3
SP_1099	1031946	1032842	+	1032893	117	5.8884	51	AGAGUAUAAUUAUUAUCUUAAAGGAGAAAACUCAUGGAAG	UUUUUGAAAGUCUCAAAGCC	.((((..........((((....))))..)))).......	-1.9	1
SP_1100	1032886	1033860	+	1033956	87	5.77972	96	AAAGCACUGCCAUUAAUUCCUGAGAACUAAAUUACUGAUU	GGUGUCAAAAAGGAAAACUU	........................................	0	4
SP_1102	1035629	1035928	-	1035513	10978	259.834	116	UGGGUAAAUCCCCUAUGGAUAUUAUGGAGCCUAUUUUUGU	GUAGAAAAAAGUCCCAUAUG	.(((.....)))(((((.....))))).............	-4.8	6
L21_leader	1037093	1037180	+	1037316	200	7.22311	136	GCAGUUUACGUUGAAAAAUUGAACGUUGAAGCUGGUCAAG	AAGUUACUUUUAACGAAGUU	.(((((((((((.((...)).)))))..))))))......	-9.2	2
SP_1105	1037216	1037530	+	1037677	1059	11.1424	147	AUGUCGUGUGUGCAUCGGUUUCUACGCUUGCCAUUAACUU	UAUCAAUUCUAUUGAGAAAU	.......(((.(((.((.......))..))))))......	-5.2	4
SP_1106	1037546	1037890	+	1037908	3220	39.9771	18	CCAGAGUUAUCACAGAAAACUAACACGGAGGAAAACAUUA	UGUUAAAAAUGACUCUUAAC	....((((.((...)).))))...................	-0.9	2
SP_1107	1037907	1038200	+	1038302	127882	1032.92	102	GCUUAAAAUAAGGCUUUCCGAGUUUUCGGAGAGCCUGUUU	UUUUGUUUUGGUACCCAUAC	..........(((((((((((....)))))))))))....	-18.8	4
srn270	1038198	1038302	+	1038302	127882	593.573	0	GCUUAAAAUAAGGCUUUCCGAGUUUUCGGAGAGCCUGUUU	UUUUGUUUUGGUACCCAUAC	..........(((((((((((....)))))))))))....	-18.8	4
SP_1110	1039154	1040071	+	1040169	2189	80.2383	98	UAGUCUAACUUUUGAGGUCACGACAUUACCUCUUUUUAUU	CUUUUUCAAAGGUGAAGCCU	.............(((((.........)))))........	-4.8	7
SP_1111	1040164	1041012	-	1040091	3268	128.915	73	UAAAUCAUCUAUCUUUUGGGUUACAGACAACCUCUUUUUU	AUUUUAUUUACUCAAGCUCU	.................(((((......))))).......	-3.4	7
SP_1112	1041154	1041993	+	1042031	73	4.11751	38	UAAAAAAUAAAUAAAAUGGGAAGAAAUAGCGUUUUUAACU	UGACCUAAAAGGGAUUUUAG	............((((((...........)))))).....	-1.1	5
SP_1113	1042099	1042374	+	1042431	54418	230.892	57	CUAUUGUAUCAAGCUUUCUAGCUUGGUCAGUAGGUUUUUU	AAUUAUGAAAUCUAGUAAUA	((((((.((((((((....)))))))))))))).......	-16.2	6
SP_1114	1042800	1044701	+	1044846	487	19.1628	145	UUUGAGCUUGGGGAGUCUGACCUGGCAGUCUCCCGUUUCU	UUGAGAUUUUGGAUAACAUU	..........(((((.(((......))).)))))......	-13.4	4
SP_1115	1044704	1045567	+	1045647	994	47.5391	80	UUUUGAUACAAUAGUUUCAAAAUUUGAGAGGAGCUUUAAU	AUGAAUCGCUAUGCAGUGCA	((((((.((....)).))))))..................	-3.9	4
SP_1116	1045647	1046825	+	1046897	1249	42.6488	72	UAAGUGUUUUUUCCGCCCUUCUCGUUUGUGAGGAGGGCUU	GUUUUAUGGUAAAAUGGUCU	..............(((((((((......)))))))))..	-16.9	2
SP_1117	1046918	1048876	+	1048914	44	2.63812	38	UAAUGGAUCGUUUAAAAACAGAGUUUAGAGAAUAUGACUA	UGUCUGUUAAUUGAGACGAG	.....................((((..........)))).	-0.6	3
SP_1118	1048988	1051267	+	1051407	33	2.09827	140	UAACAGCUCACUUGUAUAGAAAAUUUGAUAAAUAUUUUCA	CAAAACAAGACCUCCUAUCA	..................((((((.........)))))).	-2.2	5
SP_1119	1051812	1053236	+	1053272	4653	57.8811	36	AAUAACGUGUAAAACCAGGAAAUUGUUUUCCUGGUUUUAU	UUUUUUGCUAUAAAAUAAUA	........((((((((((((((....))))))))))))))	-17.9	5
SP_1121	1053719	1055647	+	1055774	26	2.275	127	GUGGGCGCUACCGUAUCAUUGACUUUGCCCUAUCAAACUG	UGCCAACUCAGGGAUUCACA	..(((((....((......))....)))))..........	-6.6	2
SP_1124	1057905	1059338	+	1059374	1017	77.0455	36	AUUAAUAGAUAAAAUCGUAUGAUGACUUCAUACGAUUUUU	AGGCUGUUUAGAGAGGAGAA	..........((((((((((((.....)))))))))))).	-13.2	5
SP_1127	1061163	1061609	-	1061158	298	11.2638	5	CCAAAACAUCCUUAUGGAAGAAAUGGUUUAGCUAAAUCUU	GCACAUAUUUAAUAAGUGCC	(((...(.(((....))).)...)))..............	-4.3	4
SP_1128	1061773	1063077	+	1063149	116886	515.559	72	UUGAAAUAAGCACUUUGGGGCGCUUUCCCUUAGUGCUUUU	UAUAAUUUAAUACCCUUUUU	.......(((((((..((((.....))))..)))))))..	-15.1	5
SpF01_sRNA	1063080	1063157	+	1063157	347	9.86976	0	AGCACUUUGGGGCGCUUUCCCUUAGUGCUUUUUAUAAUUU	AAUACCCUUUUUACUACCCC	((((((..((((.....))))..))))))...........	-13.8	5
SP_1129	1063231	1064394	-	1063193	4204	100.648	38	AAAAAAUAAGGGUGACCCAUUUCCGGGCUACCCUCUUACU	AUACCAAAAAUUAGUAGGGG	........((((((.(((......))).))))))......	-13.6	4
SP_1139	1069216	1069866	+	1069896	2129	85.16	30	AUCUAGCAUAGGGAAAUAAAGGGGCAACCCUUUAUUUUGA	UAAUGAGGAGGUAAUAGAUG	............(((((((((((....)))))))))))..	-13.2	5
SP_1141	1070349	1070660	+	1070753	81	5.4	93	ACACCGAGAAAAGAUUUUAUGGCUCAAGUGGUAUUUCAUG	CGAGAUAAAGAACAACCUAA	.(((.(((..(........)..)))..)))..........	-3.2	4
SP_1142	1070678	1071088	+	1071212	1387	74.1711	124	CGUGUCAUUGUGCUAGCAUCUAGGAAACUAGGUGCUUUUU	AUUUUAAUAACUUAAAAGUA	..............(((((((((....)))))))))....	-12.9	6
SpF41_sRNA	1071112	1071214	+	1071214	143	8.9375	0	UGUCAUUGUGCUAGCAUCUAGGAAACUAGGUGCUUUUUAU	UUUAAUAACUUAAAAGUAUU	............(((((((((....)))))))))......	-12.9	6
SP_1143	1071285	1071650	+	1071764	315	9.85456	114	CGCGUGGCUAUCAUGAGUGAGCUUAUCGAGGCUAGAAAUG	AAAAGGGUAUUAGUCAGAAG	....(((((.(((((((....))))).)))))))......	-7.4	2
SP_1144	1071640	1071933	+	1071952	346	9.68255	19	AUUAGAGCAUGAGCAGGUUUAGAAAGUUUAGGUGAUAUUU	UGACAGCAGAAAUUGGAAUA	..((..((.(((((...........))))).))..))...	-3	5
SP_1145	1071951	1073141	+	1073145	706	34.5192	4	UAAAAAUCUUGAUUACAGGAUGAGAAAGGAGAGUUAGUUA	UGGAUUUCUUAAACCAUUCU	.....((((((....))))))...................	-4.4	4
SP_RS12125	1073640	1074086	-	1073568	121	12.1	72	AAAAAUAGCCCUUCGGAUAAAAUCCGAGGGGCUAGAAACG	UUGUUAAAUCAACGGCCGAA	.....(((((((((((((...)))))))))))))......	-22.1	1
SP_1151	1075357	1078632	+	1078745	49	3.26667	113	AGAAGAAAACUGCCGAGCAAAUCGAAGCUAUCUACACUUC	UGCCCAGAAUAUCCUGGUCU	.((((......(((((.....)))..))........))))	-3	3
SP_1152	1078629	1082279	+	1082379	207	5.98469	100	UACUGACUUCGUCAGUUCUAUCCACAACCUCAAAACAGUG	UUUUGAGCUGACUUCGUCAG	.((((((...))))))........................	-5.6	1
SP_1153	1082494	1083672	+	1083712	2274	163.892	40	AGUAACACCUACCGUGUAAAUUUCAUGGUAGGUGUUAUUG	UACCUCCAAAUAAUAUAAAA	((((((((((((((((.......)))))))))))))))).	-23.6	5
SP_1154	1083881	1089895	+	1090022	94	5.38047	127	UUAUGAUCUUAUUUAUCAGCAGGAAACUCUUCCUGCAACA	GGUUCAUCAACUUCUGAGCU	..................(((((((....)))))))....	-10.6	1
SP_RS12140	1089947	1090123	+	1090149	4952	231.673	26	UUUUGCUCCCUCUGAAAAGUCAUCAUUUGAUGGCUUUUUU	CUAUAUAGGGUAAAAGAUAG	.............(((((((((((....))))))))))).	-11.6	6
F63	1090060	1090100	+	1090149	4952	276.82	49	UUUUGCUCCCUCUGAAAAGUCAUCAUUUGAUGGCUUUUUU	CUAUAUAGGGUAAAAGAUAG	.............(((((((((((....))))))))))).	-11.6	6
SP_1155	1090342	1091193	+	1091275	627	34.2733	82	GCCCUAUUUUUUUAGAGCUUGAAAAGGAUAAUCGCUCAGG	AGUUCAAAAGGAAAUCAGCA	..............((((...............))))...	-3.9	1
SP_1156	1091180	1091959	+	1091976	114	6.20139	17	GUUUUAGGUAAAAAAGAAAGUUAAUUGAAAGGAAAUAACA	UGGAGGAACAGUCGGAAAUA	...................((((.((......)).)))).	-1	1
SP_1157	1091975	1093525	+	1093612	11241	197.66	87	UAUUUAGAAAACCGAUUCUCAGGAAUGAGAUCGGUUAUUU	UUUACUGAUGAGGAAUUUUA	.........(((((((.((((....)))))))))))....	-13.6	5
F42	1093532	1093614	+	1093614	471	11.1479	0	UUUAGAAAACCGAUUCUCAGGAAUGAGAUCGGUUAUUUUU	UACUGAUGAGGAAUUUUACA	.......(((((((.((((....)))))))))))......	-13.6	7
SP_1159	1094109	1095179	+	1095244	292	16.6857	65	AUAAAUAUCAAAAAAAGAAGUUGGCCAACUUCUUUUUGAU	UUAUCCAACUACCGCUUCAG	...........(((((((((((....)))))))))))...	-9.5	6
SP_1160	1095244	1096233	-	1095214	999	33.6742	30	AGUUGGAUAAAUCAAAAAGAAGUUGGCCAACUUCUUUUUU	UGAUAUUUAUUUACAUAAUU	.............(((((((((((....))))))))))).	-9	7
SP_1161	1096297	1098000	-	1096252	82	3.77345	45	AGAUAGAUUAGACUGGAAGGUUAUUUCCAGUUUCUAUCAU	AUAAAGUAAAGGGAUAUCAU	.((((((...(((((((((....)))))))))))))))..	-16.9	4
SP_1162	1098046	1099089	-	1097960	73	4.21522	86	UGGCCUUAGAAGUAAUUAUGCCAAAAGCCGGCGUGGAUAU	GACAGAAGGACAAAUCGUCC	...........(((.(((((((.......))))))).)))	-7.1	3
SP_1163	1099307	1100299	-	1099228	364	10.0275	79	CGAGAAACUUUGUAUCUUUUAGGUGCAGAGCUCUUCGUCA	UUAAUAUCUUAGAUUAGAGC	((((...((((((((((...))))))))))...))))...	-12	3
SP_1164	1100315	1101283	-	1100255	30	2	60	AACAAAAACAAUGUCCUUCCGUGACACCAUUAUCCUUGCU	AUGUCUGAGGAAAUGCGUCG	...........(((((....).))))..............	-2.1	4
SP_1166	1101437	1102798	-	1101375	3443	142.171	62	UGACAAGAAAAUCCCUUGUUUUCACGGGGUUUUCUUUUUU	AUUUUGUGAAAUUUCUUUUA	....(((((((((((.((....)).)))))))))))....	-14.6	7
srn279	1102805	1102928	-	1102797	91	3.91646	8	ACUCUUUGGUUUAGAUAAAUCAGAAUAGAAAGAGAAGUAU	GUAUAAGACAAAGUGUUUAC	.((((((.((((.((....)).))))..))))))......	-5.2	2
SP_RS05750	1102809	1103069	-	1102797	91	3.91646	12	ACUCUUUGGUUUAGAUAAAUCAGAAUAGAAAGAGAAGUAU	GUAUAAGACAAAGUGUUUAC	.((((((.((((.((....)).))))..))))))......	-5.2	2
SP_1167	1103083	1104351	-	1102939	61	5.15493	144	AAACUAAAGAAAAAGCUGACCAUGCGGUUCAAUAUGAUAA	CGGAGGUUUAGUUAGAAGCU	.................((((....))))...........	-2.7	3
SP_1169	1104838	1105491	-	1104827	58	2.91324	11	GACAAGAGCCAAUCGAUUGGCUUAGAUAAGGAGAAAAUAU	GCCUCAGUUAGCGACGAUUU	.....(((((((....))))))).................	-8.1	2
SP_1170	1105629	1106231	-	1105523	307	16.8219	106	UAAACUGUAAAAAGUGGUUUCCAUAGCCACUUUUUGCUAU	AAUAGAGGCAGUAAAAAUGA	......(((((((((((((.....)))))))))))))...	-16.3	5
SP_1173	1107462	1107836	-	1107350	11	11	112	UCAAAAUCAGAAAGGGAUUGCUUUAUGCAGUUCCUUUUUA	UUUUAACAGGAGUGAAACUA	........(((((((((((((.....))))))))))))).	-16.1	5
SP_1174	1108258	1110717	-	1108164	221	221	94	AAAUGAGAGCAGAAUGUGAGUUCUAGUUCUCAUUUUUUUC	AUGAAAAUGUGCAAAAUAUA	(((((((((((((((....))))).)))))))))).....	-15	7
SP_1175	1110875	1113324	-	1110838	1392	30.5375	37	UAAUGAAAAAUGAAAGUCUCGAUAAAGAGGCUUUCAUUUU	UAUUAUGUAUAUAUGUAAAA	......((((((((((((((......))))))))))))))	-17.4	6
SP_1176	1113578	1115311	-	1113541	48512	149.09	37	UAAUCGAAAAGUCCCUGCAACUCAGUUACAGGGAUUUUUU	UGAUAUUUUAAAAAGAAUUU	.....((((((((((((.(((...))).))))))))))))	-15.5	6
SP_1177	1115317	1115580	-	1115304	18730	87.8733	13	ACAAUGGAAAAAGAAGGAUUGGCAUAAGGGAAAUGACAGA	AAUGCUUAAAGGAAUCGCAG	.((((............))))...................	-0.5	1
SP_1178	1115931	1116149	+	1116207	7360	117.523	58	GAAGAAACUGCUUUUAGGGCUAACUUAGAAGCCUUUCUUU	UGUAAUUAGAUAAGGGAAAU	(((((((..(((((((((.....))))))))).)))))))	-14.1	6
SP_1179	1116230	1118389	+	1118499	9414	252.266	110	AAUUUAUGUAACAUUUUAAAAGUCGGGCUUCCGACUUUUU	GUGCGAUACUCCUAUAGAAU	.................(((((((((....))))))))).	-11	5
F64	1118416	1118462	+	1118499	9414	271.914	37	AAUUUAUGUAACAUUUUAAAAGUCGGGCUUCCGACUUUUU	GUGCGAUACUCCUAUAGAAU	.................(((((((((....))))))))).	-11	5
SP_1180	1118577	1119539	+	1119648	473	14.1194	109	AGCUUCCUAGUUUGCUCUUUGAUUUUCAUUGAGUAUAAUU	CUCCACCACUCUUAACCAUC	.(((....))).(((((..(((...)))..))))).....	-6.9	4
SP_1182	1119827	1120588	+	1120693	2168	23.8451	105	AAACGCAUAGUAUCAGGUGUUGAAACACCUGAUACUAUGC	GUUUUUCUAUAUCAAAGACU	....((((((((((((((((....))))))))))))))))	-25.9	3
SP_1187	1124828	1125664	-	1124796	14	14	32	UGUCAUAAAAAUUUAUUUAAAACUAUAUAAGGAGAAUUCU	AUCAUGAAUAGAGAAGAAGU	........................................	0	3
SP_1189	1126062	1126604	-	1125913	11	11	149	UUUUUAUUUUUCUGUCUUCCUGUUUUUGUUUUGAUUUACA	AAAAUAAAUAAAAACAGAGC	........................................	0	3
SP_1190	1126937	1127917	-	1126880	155	14.0909	57	AGGAACAUGAAUCUAAAAAAAUUUAAAAAAAGUUGUAUGU	AAAGGCUUACAAAAUAACUU	....(((((...((................))...)))))	-0.5	5
SP_1200	1132584	1134407	-	1132502	3399	97.5365	82	AGAAUCAAUAGUAAAGCAGGCUUAGAUGGUCUGCUUUUUU	AGUUUUUAUACUCUUCGAAA	............((((((((((.....))))))))))...	-12.8	6
SP_1201	1134486	1135214	-	1134463	36	2.26369	23	UUGUCGCUGAAGAUUAGUACUCCUAGCAGGGUAUGGUCUU	GUCAAAAUAUCAAAAACAAU	.........(((((((.(((((......))))))))))))	-8.2	4
SP_1202	1135216	1136883	-	1135198	91	4.76163	18	GUUGAGAAACAGGGAGAAAUAAGAUGACAGAUUAUUAUGU	AAUUGGAGAUGUUCACGGAA	(((....)))..............................	-0.7	5
SP_1203	1136890	1137321	-	1136854	28	2.27027	36	GUAGGUCUAUAUGUUACUUGAAAUUUCGAUAAAAAACUUU	GCCAUUAUUGAGGCUAUUUC	.................((((....))))...........	-0.3	3
SP_RS05915	1137314	1138129	-	1137173	38	3.23404	141	CUCAGGCGACGGUAUCCCGAGAUAUCAAAGAGUUAGGUAU	UGUCAAAAUUCCUUUGAGAG	..........((((((....))))))..............	-4.6	4
SP_1205	1138122	1138997	-	1138032	35	2.35426	90	AGCAGGCCAAGCGAGGUGUGAUGGCUGGCCUAGUCGUAGC	AGUCCUUAAUGGAGAACGGU	.((((((((.((.(.......).)))))))).))......	-13.5	2
SP_1206	1138994	1139206	-	1138908	58	3.59174	86	UUAUGGAGACCAGCAGUUUGCCUCUAGUUUACGGGAGUCU	GUUCUCUAUUCUAUUCAUGC	....(.((((.....)))).)((((........))))...	-4.3	2
SP_1207	1139184	1140524	-	1139085	70	4.55939	99	UGGAAGAUGCGAUUACUGCCUUUCAAAAGGGCAUGGUCUU	GUCAAAAGAGCUCCAAGCUA	..........(((((.(((((((...))))))))))))..	-10.5	4
SP_1208	1140652	1141290	-	1140623	3842	59.8753	29	ACAGCAAAUAAUCACAUGUGGAGGCCUUGCCUCCUUUUUC	UAUUUUUCCCUCAUAAUGGU	...................((((((...))))))......	-10.3	5
SP_RS05940	1141398	1141700	-	1141360	15720	290.185	38	AAAACUGUCGAACAUCAGAGGGAAGACUCUGGUGUUUUUU	GCUGAUGAGACUAUAAAUUU	.........(((((((((((......)))))))))))...	-15.3	7
SP_1212	1141941	1142819	-	1141791	65	3.73563	150	GUACUCAAAUAAUCUAUAUAGAAAUUUAGAGGUGUGAAAU	GAAGCAAUUUAAAAUUCUUU	....(((.....((((..........))))....)))...	-2.9	3
SP_1213	1142829	1144103	-	1142753	48	3.18712	76	GAAGCAGGAAUGACCUCGCAUGAUGCGGUUUUUAAACUGC	GUAAGAUUUUGGGAACCAAG	...(((((.....))).)).....((((((....))))))	-8.6	2
SP_RS05960	1144199	1145314	-	1144157	822	51.375	42	UAAAAGAAGAUAAACAGUGGGCUUCGACUCACUGUUUUUG	AUUUUCCCUCAGGCAUGAUA	...........((((((((((......))))))))))...	-11.8	6
SP_1215	1145606	1146403	-	1145574	1714	62.5899	32	UAGAUUAAGAAAAUGAGCACGAUUGAGUCGUGCUUUUUUC	AUUUUCAAAAUAAGGUAAUA	........(((((.(((((((((...))))))))))))))	-13.5	6
SP_RS05970	1146647	1147390	-	1146610	9454	159.199	37	UAAUACAAAUCAGUGAAAUCCAUGAUUUCACUGAUUUUUU	AAGAUUUUCAUAAAAAUAUA	......((((((((((((((...))))))))))))))...	-16.2	6
SP_1219	1147390	1149858	-	1147289	139	4.20807	101	AGGAUUUCUGAUAUUACUGUCACUGGCUUUGAUUUUUAAU	ACUCAAAUUCGAAAUAUUUU	........(((((....)))))..................	-1.8	6
SP_1220	1150052	1151038	+	1151081	38050	117.086	43	UAACUAUAGACAACUCCUUGAAUUAUCAGGGAGUUGUUUU	UUUCUGUAUUAUAGUAGGUU	.......((((((((((((((....)))))))))))))).	-19	6
SP_1221	1151348	1154602	-	1151276	2850	64.4512	72	GAAAAAACGCAUAAUAUUGAGUGCUUUUGUACUGCCCCCC	AAAAGUUAGACAGAAAAAAU	...................(((((....))))).......	-5	1
SP_1222	1154767	1156644	-	1154676	340	18.6585	91	AGGAUUAGGUCAGGAAGCAUACGAUGCCCUGACCCUUUUU	GUACUUAUGAGAUGAGAAAG	.......(((((((..((((...)))))))))))......	-14.3	5
SP_RS06000	1156969	1157271	-	1156908	30	2.37288	61	AAGACGUUUUAUCAAGCAAUUGAAAAAAUUGGACCGUUAU	ACGCAGAAGCUAAUUACAAA	..((((.((((((((....))))......)))).))))..	-3.6	3
SP_1225	1157302	1158111	-	1157273	5656	180.785	29	CAGAGAUAUAGAAAGAACGCUGAGAAGGUGUUCUUUUUAU	AUUGACUGAACACCUAAAAA	.......((((((((((((((.....))))))))))))))	-14.6	6
SP_1226	1158113	1159462	-	1158099	1694	70.9027	14	UAUGGGAGGAUGAAGUAGAAGACUAGAAUGAGUGAAAUAG	GCUUUAAAUACAGUAUUUUA	.....................(((......))).......	-0.1	2
SP_1227	1159455	1160159	-	1159444	34	2.17021	11	UAGGGUAUUACAUGAGAAAUAAUGCUUGAUUUACUGAAAC	AAACCAUUUUUACCAGAGAU	..((((((((.........)))))))).............	-3.1	1
SP_1229	1161718	1163388	-	1161664	4478	118.101	54	CUUUAAGUGAGUUUGGAAAUAAUAUCCAAGCUCAUUUUUU	CUCAGACUGCAAGCAGUUCA	....(((((((((((((.......)))))))))))))...	-15.6	6
SP_1230	1163618	1164307	+	1164320	139	8.141	13	UGAAAAAAUUCAAGCCUAUCAUUCUUAGAAAGGAAAACUA	UGGCAAACAUUCUCUUGGCU	((((....))))..(((.((.......)).))).......	-3.1	1
SP_1231	1164319	1164870	+	1164903	152	6.78215	33	CGCUCUAAUAUUGCACCCAUUGCUAUCUUUUUUGCUACCA	UGCUCGUGAUACACUUUCUG	.((.........(((.....)))..........)).....	-2.2	2
SP_1232	1164854	1165417	+	1165457	4311	44.5113	40	AAAACAAUCUCCGCUUUCAAACCUGAAGGUGGAGAUUUUG	CUCUAUACAGUUUCUUUUUA	.....((((((((((((((....))))))))))))))...	-19.2	4
SP_1233	1165699	1166226	+	1166271	39	2.51073	45	AAGAACUAUGACAAAAGAUCGCAAACAAGCCCUGCUCCAA	CUCUUGAAAGAAGCUCCUAA	....................(((.........))).....	-1	2
SP_1234	1166238	1166753	+	1166885	209	6.48062	132	UAUCAUAGGCCAGAUUUAAGUUUGGAAUCUGGUCUUUUUG	CACCCAAGAAACUUCUCCCU	......(((((((((((.......))))))))))).....	-13.9	6
SP_1235	1166750	1167217	-	1166689	573	30.3029	61	UGAUCCAAGGCCUCCUCGAUAUAGUGGAGGUCUUGUUGUG	UCUCGGCUUCAACUAGGUGA	.....((((((((((.(......).)))))))))).....	-18.2	5
SP_1236	1167286	1167774	-	1167243	41	2.68852	43	UCAAAAGUAAAAGCUAAUAUGGUACCAAGUCUGAAAAUUU	AAUAAAUUAGAAAGCGAGUA	............((((...)))).................	-0.2	3
SP_1237	1167740	1168303	-	1167673	124	8.26667	67	CUGGCAAACGUGGAGAGAGGCUUAUGAUGACCUUUUGCCU	GCGGAAUUUCAGGAGACAAU	...........((.(((((((.......).)))))).)).	-7.8	5
SP_1238	1168313	1170301	-	1168304	57	3.91603	9	UAUGAUGCUGGAAGUCAAGGCCUUGGAUUAGGGGAAUAGU	AUGAUUUAUUUAAGAAAGUU	..((((.......))))...((((......))))......	-3.8	2
SP_1240	1170378	1171331	-	1170358	942	70.65	20	AAGAAAAUGAAAGGAUGUGACUUCGGUCCGUCCUUUUCUU	CGUGAAAAUACUAUAAGUAU	........(((((((((.(((....))))))))))))...	-14.1	6
SP_1241	1171501	1173666	+	1173722	337	8.13471	56	UUGAUGUAAAUGAUUUACACAAGCACUAUGGAAAAAAUGA	AGUCCUAAAAGGAAUUACGA	(((.((((((...)))))))))..................	-3.2	1
SP_1242	1173666	1174406	+	1174441	40704	297.087	35	GUCUAAACUCAAACUGUAAGGAUUUCCUUGCAGUUUUUCU	ACCUCGUAUUGGAAUUUUUG	..........(((((((((((....)))))))))))....	-14	6
SP_1243	1174555	1176042	+	1176080	17178	341.047	38	UAAAAAAAUUUCCUGCAAGUUUAUGCCUUGCAGGAUUUUU	GCUUCUGAUUAGAUUAAACC	.....(((..(((((((((.......)))))))))..)))	-14.4	5
SP_1244	1176088	1177377	-	1176044	2838	62.9195	44	AAGCAAAAAUCCUGCAAGGCAUAAACUUGCAGGAAAUUUU	UUUAUUCUAAGCGACCAUCU	.........(((((((((.......)))))))))......	-15.2	4
SP_1247	1178990	1182529	-	1178846	44	2.74143	144	GGGAUUUACUUUGCGGUAGCUUCGGGUCGGGGAUUUCUGU	CUCUAGAAAAAUUAUUUGCU	(((((((....(.(((.....))).)....)))))))...	-5.7	5
SP_1248	1182520	1183218	-	1182464	28	2.31193	56	GGGGUUCAAGUCUUUUGCUGAUAAGACCAAGGUCGUUUUU	GACCAAGGUGUGACGGCAGU	..((((...(((.......)))..))))............	-4.1	6
SP_2249	1183401	1183472	-	1183361	3370	45.3603	40	UGUAAACAUCCUAAAAAGCCUUUAAUAGGGCUUUUUUCUU	UAUCCUGACCCAAAUUUGCC	............((((((((((....))))))))))....	-10.4	7
SP_1249	1183536	1184522	-	1183504	1278	24.7232	32	CCCACUAAGACGGGGUCUUUGACCAAAAAACUUGUUAUUA	GAGCAAAUUUCUGUUAUAAU	.((........))((((...))))................	-4.7	5
SP_1250	1184697	1186040	-	1184681	226	13.1014	16	GAUGAAGAAGUGGGGAGAAAAUAAUUUCCCCUCUUUCUUU	UAUUUUUAACACAAGUAAAA	...(((((((.(((((((......)))))))..)))))))	-14.8	6
SP_1251	1186000	1187934	-	1186000	22	22	0	UGACAAUGAAGGCGAUGAAAACGAUGAUGCGGAUUACUGA	UAAUCAACACAAGAUUAUUA	.............................(((....))).	-0.3	3
SP_1252	1188095	1188265	-	1188037	866	44.0339	58	UGUUAUGAGAUAUUAAAGCUCCUAACACUGGGCUUUUGUU	UAGAAUUUCUUUUCUUUUUC	..............(((((((........)))))))....	-6.2	6
SP_1260	1192370	1193002	-	1192328	4076	146.781	42	AAUAGAAAGGAACUGCUAGCUUUGGGUAGCAGUUUUCACU	UAUGUUUGAAAUUUUUAAAU	........((((((((((.(....).))))))))))....	-13.8	5
SP_1261	1193095	1193454	-	1193038	36	2.48727	57	UGCCUUGAUAAAAUUGAAAGCAUAUUCAUAACAAUAUGAU	AUAAUAAAAUUGAAGUAAUA	(((.((.(......).)).)))...(((((....))))).	-3.7	3
SP_1263	1195085	1197184	-	1195032	2404	96.5277	53	GCUAAGCUCGAGAAAGGACAAAUUUUGUCCUUUCUUUUUU	GAUAUUCAGAGCGAUAAAAA	.........((((((((((((...))))))))))))....	-14.8	7
SP_1264	1197351	1198394	-	1197313	70	4.689	38	AAUUUCUUGAGAAUAGCUGGUUUCUCUCGUGAGUCUUCUA	UGUAUAUCAAAGGAAGACUG	........(((((........)))))..............	-4.7	4
SP_1266	1199284	1200132	-	1199166	88	88	118	AUUAGCAAGUUUUUAACACUUGAUAAUAUGCGUUUUUUCU	AAGUGGAUUAGUAGAGUAGA	((((.(((((.......))))).)))).............	-3.7	7
SP_1267	1200228	1200917	-	1200191	32085	385.92	37	UAAAGAUUCCAACAUCUGACAAAAUAGUCGGAUGUUUUUU	GAUUUUUUACGAACUUUUAC	..........((((((((((......))))))))))....	-13	7
SP_1268	1200929	1201807	-	1200858	117	4.80975	71	AGCGGGAUUGGGAACUCGCUUGCGUCCUAUGACUGAAAAU	ACCCCUAAAGCCUUGGUUCA	((((((........))))))...(((....))).......	-7.9	2
SP_1269	1201797	1202666	-	1201716	197	4.6436	81	GCUUGGGUCUAACGGUUAGUGCUUAUAUCUUUUCGAUUUU	UACAGAUUUGUCACCCUUUG	...(((((((((...)))).)))))...............	-2.5	5
SP_1270	1202683	1203705	-	1202665	259	10.741	18	AGUGUUUAAGUGGGAAGUAUAAGUACUGGAGGUUAAUUGU	GGAGAAAAUCAUUAAAGAAA	.....((((.(....((((....))))...).))))....	-2.1	5
SP_1271	1203710	1204417	-	1203702	189	4.61143	8	AGAUUGCAAAAAGUAUGAUUGAGAAAGACUAGUAAAAUGA	UUAAUCAAAUUUAUCAACUA	........................................	0	2
snR45	1204216	1204351	-	1204169	267	5.9449	47	UCUUUAUAAGGAACGUAUCAUCAUUACAAAGGGUGGUGCU	GACCGCAAUACAAGUAUUAA	..............((((((((.........)))))))).	-7.8	3
SP_1273	1206250	1207053	+	1207056	105	8.17365	3	ACAGUCAUGAAUUUCACGCUUAUAAAUUGGAGGAUUAGGA	UGCAAUAUUUAGAAAAAAAA	..((((.(.(((((.........))))).)..))))....	-0.9	2
SP_1274	1207055	1207864	+	1207988	1519	31.6458	124	UAAAACGCAUCAUAUCAAGGUUUUUGAAAAACCUUGAUAU	GAUGCGUUUUAUAAUUUUAA	...........(((((((((((((...)))))))))))))	-13.1	4
SP_1276	1211628	1212707	-	1211531	105	5.16839	97	AAUGUAGAGAAACCAACUUGGAUUGUCAAUCCUUCCUUGA	UUUCCUAAAAUUCAAUCGCU	......((.((.(((...))).)).)).............	-3.8	4
SP_1277	1212757	1213680	-	1212634	178	9.36842	123	CAGUUUUUGAAGGCAAGGCCUUCGGAGCAGAUAUUGAUGU	AACAGGCGAAAUCGUCUUUA	....((((((((((...)))))))))).............	-10.7	4
SP_1278	1213699	1214220	-	1213679	33	2.58824	20	UGAUUACUGAAGAAGCUUAGAAAGUUAAAGGAGUAGCCAU	GUCAGAAAAUCAACAAGCAU	((.(((((.....(((((...))))).....))))).)).	-4.5	2
PyrR	1214232	1214364	-	1214232	73	4.5625	0	UAAAUUUCAAGUCUCCUUGUUUAAGGAGACUUUUCUUUUU	GGAGGUUUGUCAUGAAAACA	........((((((((((....))))))))))........	-13.2	7
SP_1279	1214431	1215060	-	1214394	215	9.90449	37	UAAGAUGCUACAUUGAAACUUUUUGCUUGAUUUUAAGCAU	GCUUUGUGCUAUAGUAAAUG	.......................((((((....)))))).	-4.7	3
SP_1280	1215060	1215602	-	1214951	98	4.67753	109	CUAGUCUUGAUUUUACCAAUCAUUUUGAACUCCUGGUUGC	GGUCAUGUUAUCAGCCCAGA	................((((((...........)))))).	-2.4	3
SP_1281	1215772	1216089	+	1216238	46	46	149	AGAACCUUUAUUUAGUAGAUCUUGUUUUUGUCUCUUUUUG	UGUGCUCUUUUAUGCUCUUU	.............((.((((.........)))))).....	-0.2	6
SpF43_sRNA	1216148	1216246	+	1216325	31	31	79	ACAUAGACUUUGGGCUCUACUAGGUAAAGUAGAGCUUUUU	GUUAUGCACUAUGAACAUUC	...........((((((((((......))))))))))...	-13.3	5
SP_1282	1216328	1217887	+	1217932	140	10.3158	45	GCAACAUAGCAAAAAUCCAGAGACGACCUCUGGAUUCUUU	UACAUCUGUUUUAAACGUUC	((......))...(((((((((.....)))))))))....	-13.6	5
SP_1283	1217931	1218830	-	1217900	9441	42.4854	31	CAGAUGUAAAAGAAUCCAGAGGUCGUCUCUGGAUUUUUGC	UAUGUUGCAAAUUUAUAAAU	.........((((((((((((.....))))))))))))..	-15.6	5
SP_1284	1218832	1219392	-	1218779	66	2.76774	53	CAAAUUGCAAGCAAUAAACGAAAAACCUGGAUUUUGUUGC	UGGUAUUUUUCCUACUCUUA	..........((((((((..............))))))))	-4.1	5
SP_1285	1219486	1220199	+	1220336	47	2.6192	137	UCUAGGCUCGGGAAAAAAUGAUUUACAAAAUCAUUUUUUU	CUGCUAUACUAUCCUAAGCA	...........(((((((((((((...)))))))))))))	-8.3	7
PyrR	1220356	1220479	+	1220479	503	503	0	ACUCUGAGGGCCUAUUGCUGUAAAAUAAUGGGCUCUUUUU	UGAUGCCCAAAAGUGAGGUU	.....((((((((((((........))))))))))))...	-14.4	6
SpF44_sRNA	1220366	1220460	+	1220479	503	503	19	ACUCUGAGGGCCUAUUGCUGUAAAAUAAUGGGCUCUUUUU	UGAUGCCCAAAAGUGAGGUU	.....((((((((((((........))))))))))))...	-14.4	6
SP_1286	1220466	1221785	+	1221831	3339	48.8336	46	UAAAUACACCUAAUCCACUCAGACAGCUGAGUGGAUUUUU	CGUAUACCAUAAUAAAAGUG	...........(((((((((((....)))))))))))...	-16.4	5
R2	1221797	1221902	-	1221793	126	10.9565	4	CGAAAAAUCCACUCAGCUGUCUGAGUGGAUUAGGUGUAUU	UAGACUCUUAGUCUUUAUUU	.....(((((((((((....))))))))))).........	-16.1	4
SP_1287	1221980	1223551	-	1221872	6089	175.374	108	GUAUCAAGGUUUUAGAAUAUCUGAUAUUAUACGUUUUUUG	AUUUUAAUAAUUUUGUUAAG	((((((.(((........))))))))).............	-4.5	6
SP_1288	1223563	1223895	-	1223550	57	3.06969	13	UUAACAAGCAUUGAUAAUAGAGAAUAAGAGGAAGAAAAAU	GGCAUUUGAAAGUUUAACAG	........................................	0	1
SP_1289	1223986	1224363	-	1223971	200	7.9096	15	UCAAUUGGAAAUUACUUGGGGCUAGGCUCAUGUCUUUUUC	AAAUUUAGCUAUCUAUCUUC	......(((((..((.((((......)))).))..)))))	-7.1	6
SP_1290	1224435	1225739	+	1225753	76	4.71895	14	GAUCAUUUUACCCCAAAUAAAAACUAGAAGAGGAAAUUUA	UGAGUAUUAAACUAAUUGCC	........................................	0	3
SP_1291	1225752	1226558	+	1226562	30	2.02783	4	CGGCGUUGCCCAUGCCAUCCGAACAUGGGUACUGUAAAAG	UAUCAUUUUUCAAUAAGAAU	..(((.((((((((.........)))))))).))).....	-12.7	2
SP_1292	1226601	1227599	+	1227721	1911	72.3407	122	AUAAUAUUAUGGAGACAAUCCCCUAUAUUAUGCGUUCUUU	UAAUAUCAAAGACUUUUUGA	(((((((...(((.....)))...))))))).........	-6.1	5
R16	1227703	1227744	-	1227671	12	12	32	UAAUAUAGGGGAUUGUCUCCAUAAUAUUAUGCGUUUUAUU	AUUGAAAAAUUUGGGCAAUC	((((((.(((((...)))))...))))))...........	-6.2	6
SP_2250	1227766	1227837	-	1227764	321	29.1818	2	CUAAGGAGUAGUUGCAGGUUCGAUUCCUGCAGGGGGCAUG	UAAUUAGAUAUCAAAGAAGU	.......((..(((((((.......)))))))...))...	-10.4	1
SP_1293	1227880	1228227	-	1227840	153701	161.372	40	UUCGACUAAAAAACUCUGCUCAUUUAGCAGAGUUUUUAUC	UAGCUCCCUUAGUUCAAUGG	........((((((((((((.....))))))))))))...	-14.8	6
SP_1294	1228346	1228675	-	1228199	115	5.32028	147	AGGAGAAUAAAAUGAAUCCAUUAAUCCAAAGCUUGACUGA	AGGUCAACUUCGUACAGAUA	.(((......((((....))))..))).............	-2.1	3
SP_1295	1228669	1229043	-	1228550	43	2.74578	119	GCCACUCGGAACGCUCAUAGCUAAUCUUUUAGGUUGUUUU	UUAAUUGGAGUAUUCUACAA	(((....(((..(((...)))...)))....)))......	-3.2	6
SP_1296	1229040	1229306	-	1228899	73	3.83718	141	CCUUGGGGCACUCUCUUUGUCAACUAUCUGGGAAUUUUCU	GCUUGAUUUAUCUUGUCAAG	((((((((((.......))))..)))...)))........	-2.9	5
SP_1297	1229422	1229865	-	1229380	29402	286.883	42	AUAAAAGUGCGCUGAUGUAAUCAAUCAGUGCAUUUUUCUU	AUCGAGAGUUGGGAUUUUAC	..((((((((((((((.......))))))))))))))...	-17.3	7
SP_1298	1229969	1230904	+	1231001	100	6.04027	97	GCUCGCAAAGAGACCAUGGCAGAAAGGAAAUAUUGCAAAA	UGAAAAAAGAUAUCCAUCCA	.(((.....)))......((((..........))))....	-3.2	2
SP_1299	1231000	1231242	+	1231274	335403	341.392	32	CUCAAAUAAUGAUAAGAGAACAGUUUUGGCUGUUCUUUUU	UGUUUCUUGAAAUCAACUGC	.............(((((((((((....))))))))))).	-11.7	7
SP_1300	1231299	1231517	-	1231244	48	2.64828	55	UCAAGAAACAAAAAAGAACAGCCAAAACUGUUCUCUUAUC	AUUAUUUGAGACCGUAUUUU	..............(((((((......)))))))......	-7.7	4
SP_1306	1232602	1233948	+	1233991	21998	125.832	43	UUUAUUUACUCAAUCCUCAAUCACUACGAUUGGGGAUUUU	UAGCUUGAAUUAAAAAAUUG	...........(((((((((((.....)))))))))))..	-13.7	4
SP_1307	1234454	1234624	-	1234442	82	3.70323	12	GAUUGUUUACAAAAACAAUAAGAAUUAAGCAUAAUUUUUU	GCUGUAAACUAAGGAGUAGA	.(((((((....)))))))((((((((....)))))))).	-5.3	6
SP_RS06410	1234637	1235221	-	1234604	67	4.20563	33	GAAAUGAGGUGUAAAGAAAAUGAAGAAAGAAAAUGAAUAU	GUAAUUUUAACAACAGCCUC	........................................	0	3
SP_RS12185	1236012	1236074	+	1236129	22	22	55	ACUGGAGAACUCACGGAUAGUUCCUAAUCUGGAGAUUUCU	UAUUUGCACUUUUCUUGUAC	...(((((.(((.(((((........)))))))).)))))	-10.9	4
SP_RS06445	1237775	1238098	-	1237625	18	18	150	AGAAAGUCGUGAUUUCUAUUGAAAUGAGGACUUUCUUUUU	AUACUCAUCUGCUUUCAAAA	((((((((.(.(((((....))))).).))))))))....	-16.5	7
SP_1315	1238537	1239148	-	1238463	46	46	74	UAUCAGCUUGGAUAAGGCUUUAAGCCUUUCUAAGCUUUUU	UUAUUGACAGUAUCAGGAUA	....((((((((.((((((...))))))))))))))....	-17.1	5
SP_1325	1248260	1249369	-	1248143	17	17	117	AAUAGAGAUGGGACUGGGAUAAUGCCCAGUCCCAUUUUUU	AUCAAAAAGUAAUGAGAUCA	...(((((((((((((((......))))))))))))))).	-24.9	6
SP_1338	1261328	1261507	-	1261281	44	44	47	GAUAUCAAAAAAAUGCACAGGAUAACCUGAUGCAUUUUUU	UAGCGACAAUGCUUGCUACU	.......((((((((((((((....)))).))))))))))	-14.4	6
SP_1341	1263279	1264037	-	1263151	11	11	128	UAUGGGAUUGGCUGUUAAUGGGGUAAUUAAUGUUGAGAAU	AAUUCGCAAGUAUUUGUCGG	.......(((((.((((((......)))))))))))....	-3.6	3
SP_1342	1264034	1265641	-	1264018	118	11.8	16	GGAACACUUUUCAAAAUUAAGUGAUUGGAGGCAAGAAUAU	GGAUAAAGAUUAUAUAUUAA	....(((((.........))))).................	-2.9	2
SP_1343	1265638	1267578	-	1265501	24	24	137	AUAUGCAGGUAGUUUAAAUCAGACUUCCUCAUUUUCUGAC	GUUCUAAGAUUUGGUGCUAU	..(((.(((.(((((.....))))).))))))........	-6.8	4
rli38	1274492	1274628	-	1274447	16962	46.9861	45	AAACUUUCGGGGGUAGACACUAGAUUGUCUACCCCUUUUU	UUGUGUUUCGGAGGUAAUUA	........(((((((((((......)))))))))))....	-19.2	5
SP_1354	1274614	1274982	-	1274495	201750	993.203	119	UGAUUUGGUUUCCUGCCAAAAAUUCUUUGGCAGGAUUUUU	GUUUUAAUAAACUUUCGGGG	..........((((((((((.....)))))))))).....	-15.6	5
SP_1355	1275058	1275558	-	1275020	2684	10.5165	38	AAUCUUAAGCUACACAGCGUAGCCUAGCUACGAAAAAAAC	UAUUAUAAAAUUUAAAACUU	.................((((((...))))))........	-7.3	0
srn308	1275562	1275711	-	1275440	154	5.79181	122	UCGUUGUAGACGCUCGUGGUUUGACAGUUGAGCAAGAUAC	AGUUCUUCGUCGUGAGCUUC	...........(((((((......))..))))).......	-6.2	1
SP_1356	1275807	1277363	-	1275751	7682	146.852	56	AAUUUUAAAAAAGUUUGCAAAAAUCUUGCAUUCUUUUUUU	GACUAUGCUAUACUUAUAUA	......(((((((..(((((.....)))))..))))))).	-9.9	7
R17	1277341	1277388	-	1277200	11	11	141	AAGUCAGCUCAAAACACUGUUUUGAGGUUGCAGAUAGAAC	UGACGAAGUCAGCUCAAAAC	..((.(.((((((((...)))))))).).)).........	-9.6	1
SP_1357	1277458	1279209	-	1277400	863	66.3846	58	UUUAUGGACGAAAAAAGUUGCCUUCGAGUGACUUUUUUGU	UACAAUAGCUAGAAAAAUUG	..........(((((((((((......)))))))))))..	-8.6	7
SP_1359	1280993	1281931	-	1280962	8086	135.671	31	AACAAAUAAAACAGAGAGUGGGGCUUCCCACUUUCUUCAU	UUCUAGAAUAUGAAUAGAAG	............((((((((((....))))))))))....	-15.4	5
SP_RS06655	1281960	1282150	-	1281919	94	4.25605	41	UAAAAACGUGAUAAAGGAGAAAUAAAGAUGGCAGAAAUUU	AUCUAGCAGGUGGUUGUUUU	........................................	0	3
SP_1360	1282226	1283095	-	1282111	547	17.4801	115	AUGAAAAUCAAAGAGCAAACUAGGAAGCUAGCCGCAGGCU	GCUCAAAACAGUGUUUUGAG	..............((...((((....))))..)).....	-4.4	1
SP_1361	1283097	1284383	-	1283046	82	4.83708	51	UUGUACCUGCAACCAGUGCCAAUAUCGGGCCAGGUUUUGA	CUCGGUCGGUGUAGCUGUAA	....(((((...((.(((....))).))..))))).....	-7.2	4
SP_1362	1284534	1285271	-	1284472	20241	553.23	62	AGAUUUUAAGAAGAGCGAAUCGUCUGAUUCGUUUUUUCUU	UUUAUACUGAAAUAGUGAUU	.........((((((((((((....))))))))))))...	-12.5	7
SP_1363	1285471	1286505	-	1285413	7292	138.553	58	UCUUCAAAGUCGGCUCUUAGCCGAUUUUGAAGGCUUUUUC	UAUCUGUCUGCAGAAAUUUU	.((((((((((((((...))))))))))))))........	-20.5	5
SP_1364	1286534	1287967	-	1286504	73	4.78522	30	GGAAAACUAGUAUCUACUAAACAAAGGAGAAAAAAAUCAU	GUUUGAACAUUAUUCAGUAG	.......((((....)))).....................	-0.8	2
SP_1365	1287983	1288969	-	1287966	50	4.32692	17	AAAAAUCUAAAAAAUUACAUUAGAACGGGGGUGACCAAGU	GAUUGAUGGGAAACGAUUAU	.....(((((.........)))))((..((....))..))	-3.8	1
SP_1366	1288971	1290128	-	1288961	91	5.29701	10	GAACAAGUAGAAAAACUAUUAGAGGAGUAGCAUGGAAACU	GCAUUAAUUAGUGUGAUUGU	.....(((((.....)))))....................	-1.3	2
SP_1367	1290064	1290909	-	1290041	223	12.6545	23	GAGAAUAUGGUGGCUAAGAAAAAAAUCUUAUUUUUUAUGU	GGUCUUUUUCUCUUGGAGGU	....((((((.((.(((((......))))).)).))))))	-3.4	6
SP_RS12210	1291029	1291176	-	1290971	3956	50.2349	58	GAUAGCUAUUUGGAUAGCAGUCAGGCUUUGAUUUUUUACA	GUCUGCAAUAGAUUUUCACC	(((.(((((....))))).)))..................	-5.8	5
SP_1368	1291188	1292462	-	1291137	145	9.04232	51	AUGAAAAUCAAAGUGCAAACUAGGAAGCUAGCCGCAGGCU	GCUAAAAACACAGUUUUGAG	.............(((...((((....))))..)))....	-5.3	1
SP_1369	1292459	1293307	-	1292381	349	20.1269	78	UAUGAUUAUUUGCUAAAAAAUAUUCACUAUCUCAAUGAGA	GAGAAAAAAAUGAGUUUGCC	..(((.(((((......))))).)))...((((...))))	-5	1
SP_1370	1293304	1293780	-	1293289	180	8.34018	15	GGAAAUUAUAGAGGAACUAAGAUGAAAAUUGCUUAUCUAG	GUCCCAAGGGAUCAUUUUCA	...................((((((.......))))))..	-2.9	4
SP_1371	1293773	1295056	-	1293649	99	4.75962	124	UGAGAAUCGCCUAGGUAUGUCCAUUGCGAAUUUUUUCGCU	GAAAAGGGAGAAACAGCCUU	.(((((((((...((.....))...))))...)))))...	-7.9	5
SP_1372	1295148	1295486	-	1295097	6655	97.1828	51	UCCUAAAGUCAGGAAUUUUUAAGGAAUUUCUGGCUUUUUA	UGAUAAAAUAGGUAAAAGUA	....(((((((((((((((...)))))))))))))))...	-13.7	5
SP_1373	1295497	1296600	-	1295392	161	7.01158	105	CAGAAUACAAGGCUGUUAAAGCAGCUAAAGAUGCGAUUGC	AGCAGAUGCUGAGGCAAGCA	..........((((((....))))))..............	-7.3	2
SP_1374	1296610	1297776	-	1296605	152	7.76771	5	UAGCCAAACACCGAGACUAUACAAAGAACUAUUAAGGAGU	UCCUAUGGCAAAAACAAUCU	........................................	0	2
SP_1375	1297786	1298853	-	1297775	126	7.09003	11	AAGAGAUGAAAGACUACUUGGUAAAAUAAGGAGAGUGUAU	GAGAUAUUUAACUGCAGGAG	..........(.(((.((((......))))...))).)..	-2.1	3
SP_1376	1298872	1299726	-	1298852	44	3.21595	20	UAACAGAAAAAUACCAAUAAAGAAAGGGAGACUCUCCUAU	GAAAAUCAGAAUCGAUAUUC	.........................(((((...)))))..	-5	4
SP_1377	1299716	1300393	-	1299644	155	7.41814	72	AUCCUAUUAAGCAUUCUAUUUCUCCCUUCAUCCACAAUAG	AGCCUUUGAGGCGACAGCUA	........................................	0	1
SP_1378	1300390	1301562	-	1300257	85	3.73016	133	CCGACUAUCUGCCUAAAGAAGCGAUUUUGCAGGUAGCUCC	AGCCAUUUUUGAAAAAUUCG	..((((((((((..(((.......))).)))))))).)).	-10.6	2
SP_1382	1304783	1306237	+	1306282	5219	215.534	45	UCAUAAUAACCAAGCUAGGUCCAAGCGGAUUUGGCUUUUU	UGUAUUCACAAAAAGACCUA	...........(((((((((((....)))))))))))...	-13.7	5
SP_1383	1306327	1308945	-	1306293	1165	26.9282	34	UUGUAAUCAAGUAAAGAUCUAUCCAUUUGGGUAGGUCUUU	UUGUGAAUACAAAAAAGCCA	............((((((((((((....))))))))))))	-14.4	4
SP_1384	1308967	1309452	-	1308944	111	6.01318	23	AAAGCCAAUCACAUUAAACAAGUGAAUAAGGAGACAAUAU	GAAACAACUAUCUAGUGCAC	....((..((((.........))))....)).........	-2.5	2
T-box	1309488	1309659	-	1309469	3233	127.748	19	CCGCGGUUUUUCGCCCUUCGUGAUAUGAGCUUGUCUUUUG	AUUUUUGGAGGUGUUGAUGA	..((((....)))).......((((......)))).....	-5.6	5
SP_1386	1310219	1311289	-	1310172	998	64.7351	47	ACGUAAGAAGACGAAUCAGUCAAGCUGGUUCGUUUUUAAG	GAAUAGAAGUCAGUUUUUAG	......((((((((((((((...))))))))))))))...	-16.2	5
SP_1387	1311286	1312059	-	1311269	65	4.29752	17	GUGAGAAGGAGGAGCAAGCAUGAAAAAAAUCUAUUCAUUU	UUAGCAGGAAUUGCAGCGAU	(((((..(((...................))).)))))..	-0.9	5
SP_1388	1312056	1312862	-	1312007	55	3.59615	49	CCAACCUUUAUCUGGGACUGGUCUUUCUGGUCCUCUACCU	GCCUAUCUUUUACUUGAUUG	.............((((((((.....))))))))......	-9.8	3
SP_1389	1312843	1314000	-	1312743	71	3.64509	100	GAUUUUCGGUCAAUCCUUUUUCAACAUCGAAGGCCAGUUC	AGUUUAGAAAAUUACAAAUC	(.((((((((...............)))))))).).....	-3.4	2
SP_1390	1314059	1315009	-	1313998	45	2.5641	61	AUCGGUUAAUCUAUGAAAAAGAAGGAAUUUAUGCCAAUUG	AAAAAGCCAAUUAUCGAAUU	...(((((((((...........)))..))).))).....	-0.9	2
SP_1391	1315121	1315873	-	1315098	3832	95.9714	23	UUUGUAAAAAAUCAUAAAAAGGGGGGAACCUCUUUUUCUU	AUGCAAAAUCCAAACAAGGU	...............(((((((((....)))))))))...	-9.5	7
SP_1392	1315883	1316614	-	1315748	39	2.35714	135	UAAUCUAGCUGUCUUGGGCUUGGGUGCAGUCGCUUUCUUU	GUCUCUUCGCAGAUUUUGGA	..((((((((......))).)))))((....)).......	-6.6	6
SP_1393	1316756	1318027	+	1318045	142	8.55422	18	AUUUAAAAGCAGAAUUGGAAUGACAUCCAACUCUGCUUUU	UCUUAUUCUUCAACUUCAGU	....(((((((((.(((((......))))).)))))))))	-16.2	5
SP_1394	1318047	1318862	-	1318006	3705	117.476	41	AAAAAGCAGAGUUGGAUGUCAUUCCAAUUCUGCUUUUAAA	UAGUUUAAAACAUUUUCCAG	.(((((((((((((((......)))))))))))))))...	-21.8	4
SP_1395	1319019	1319672	-	1318963	25876	530.17	56	AUAAAAGGGAGCUUGAAAUCAACUGAUGGCUCCUUUUUUU	GAACGAAAAAAUAUUUUUGA	..(((((((((((....(((....))))))))))))))..	-13.5	7
SP_1396	1319684	1320442	-	1319671	326	8.82118	13	GACUAUAUUACAGGAAAAUUUGGAUAAGGAGAUGAAAGAU	GUUACGAUCUCAAUUUGAAG	..((.((((.(((......))))))).))...........	-0.5	2
SP_1397	1320455	1321258	-	1320441	213	5.72982	14	ACUAUGUAUCUGGUCACUUUGGUUAGAAAGGAAACCGUAU	GACAGAUGCGAUUUUACAGG	..........((((..((((......))))...))))...	-5.1	2
SP_1398	1321269	1322153	-	1321257	173	6.47991	12	UCUACACAAGAAAUUAACCGCUGCCUAAAGGAGAAGCCAU	GUCAACAUAUAACUGGGAUG	...................(((.((....))...)))...	-2.3	1
SP_1399	1322143	1323060	-	1322062	84	3.73087	81	CUAGCAUCAUUGUGACAAUCUUGGCUUCCUUGAUUCUCUA	UAUCUUGGUUCGGGGCUUGC	...(((....)))((.((((..((...))..)))).))..	-4.6	4
SP_1400	1323060	1323938	-	1323050	483	14.4087	10	ACUGUGACAGUGUUGGAAGGGAGACAAUAAUGAAUCAAGA	AGAAUUAGCUAAGAAAAUGU	....(((((.(((((.........))))).))..)))...	-3.2	1
SP_1403	1325817	1326590	-	1325738	532	14.0528	79	AUACUAGGAGAUGAGGCAAGAGAUUUUCUUGCCUCUUUUG	AGGAGGAAGCGGUUUCGGCC	........(((.(((((((((.....))))))))).))).	-15.3	5
SP_1404	1326580	1326858	-	1326509	28	28	71	GCAGGUCAGUACAUUCUUGACCAUAUGCAGGAAGACUUGC	GUGUUGAAACCAAGUCCUCU	(((((((......((((((........)))))))))))))	-11.8	2
SP_1405	1326858	1327259	-	1326789	10431	187.271	69	UUGUCGUGGAGCACUGAAGAACUUGCUUCAGUGCUUUCUU	UUUUUAAUGAUGUUGAAGCU	.......((((((((((((......))))))))))))...	-17.1	5
SP_1406	1327469	1328119	-	1327335	1292	62.6224	134	UCGCAAAAAGCCUAUUUUUCUUGAAAAAAUAGGCUUUUUU	UCUAAAAAUCCCUAGUCAAG	....(((((((((((((((.....))))))))))))))).	-15.1	6
SP_1407	1328076	1328849	-	1328017	130	5.43408	59	AUGCUCUUUCUCCUCUCCCUCUCCAUCCUUCUGACCAUUU	AUCUGGCUUGGAUUUUCUAU	........................................	0	3
SP_1408	1328860	1329597	-	1328848	69	3.60558	12	UACUUGGCAAGAAAUAAAAAAGGCUUAGGGAGAAAUAGAU	GAAAUAUAAAGGCUAUUUAA	..((.(((..............))).))............	-1.8	2
SP_1409	1329602	1330732	-	1329583	75	4.41176	19	GAACGAUUUAUUUUGGAGUAGGAUCAUGGGCUUAACUUAU	CAAAUGAAAAUGAAAAUUCC	...(((......)))(((((((........))).))))..	-2.3	4
SP_1410	1330816	1331205	-	1330768	6529	144.395	48	CAUCUCCGGACGGACUAUGUAUCUGGGGAUGGUGAUUUUU	AUCUGGAAUCUAGUCUUUGU	((((((((((...........)))))))))).........	-13.2	6
SP_1411	1331221	1331604	-	1331204	246	11.5836	17	CAAGUAAAUUUUUCAAAAAAUAAAAAAGGAGAAUCCUUAU	GGGUAAAUUAUCCUCAAUCC	.........................(((((...)))))..	-3.3	4
SP_1412	1331605	1332393	-	1331603	714	22.7458	2	AGAAGGCCCCUUACUAUAUUACAGAGGAGGAAAACUAAAU	GUUAGAAGUUGCAUAUAUUC	......((((((...........)))).))..........	-4.7	2
SP_1413	1332386	1333336	-	1332273	137	6.43843	113	GCGGUUUAUUUGACCAUGAAAGAAGCACCUAGAAAGAAGA	UCAUACCAGACGAUAUUUUA	..((((.....)))).........................	-3.5	0
SP_1414	1333451	1333627	-	1333416	144350	681.969	35	UCUAAUUGAAAUGAAAGGCUAGAGAAAUCUAGUCCUUUUU	CUUUUAAAUAAAUACUCCAA	............(((((((((((....))))).)))))).	-11.6	6
SP_1415	1333773	1334474	-	1333701	151	5.74234	72	CAACUCUUGUAUAAAUGGAAGAAAAAAUCAAAAUUAAACC	GCAUUUUUGCUUGACAAUUA	....((((.((....)).))))..................	-2.1	2
SP_RS06945	1336314	1336703	-	1336164	32	32	150	UAGUCUUCUGUACAUUAGAAUUCAGAUUUGUUCACUUUUU	GUUUAAUACUCAAUGAAAAU	.(((((((((.....))))....)))))............	-2.7	5
SP_1420	1340809	1341633	-	1340731	891	8.91229	78	UUAAAAAGCAAGAAAAACCUCCACUGGAGGUUUUCAGCCU	CUCAUCUUGAAAUAAGAAAG	.......((..(((((.(((((...)))))))))).))..	-11.3	3
SP_1421	1341630	1343090	-	1341564	107	5.64478	66	CUGGGUGUCAAACCAGUGAUUGAUGCCCAGGAAGAAAUCC	GUCGUUCUAUUGAUUUCUUA	(((((((((((........)))))))))))..........	-15.9	1
SP_1426	1344918	1345565	-	1344895	15	15	23	UUUGGGAUAUUGUUUAGGAAGAGGGAUUGAGAAUUACUAU	GUCUGGGAAUAUUCAAAAUA	........................................	0	4
SP_1427	1345987	1346712	-	1345879	2343	181.784	108	GCGAAAUCCCUUGAUGCGCAAGAGAUUAGCUGUCUUUUUU	AUUUUUUAAGUGAUAAAGUC	(((..(((....))).)))(((((((.....)))))))..	-8.3	7
SP_1428	1346961	1347272	-	1346841	1478	64.0188	120	UAUCAAGAUUGUUCAAUACCUGAUACUAUGCGUUUUUAAG	AUUUUAAAGACUUUUUUCCU	(((((.((((....))).).)))))...............	-1	5
SP_1429	1347287	1348573	-	1347144	53	3.64918	143	UGAUUGUAAAAAGUAUUAUGCUUGUUAUCGGUGUCAUGAU	UCAUUAGAACAUCACCCUUU	..(((((((.(((((...))))).))).))))........	-3.3	3
SP_RS07015	1349197	1349379	+	1349454	31	2.1934	75	CUAAGACUUUUGAAAUUGAUUGUUUAGUCGGAGAAAAACA	CGCAUACGAAAUAAAAUGGU	((..((((.................))))..)).......	-3.6	0
SP_1430	1349389	1349754	+	1349880	50	3.28032	126	UACACAGAAAACCCAAAAAUUAUCUAAUAACAAAAAUAUU	AUGUAUUCAUUCGAAGAUAC	........................................	0	3
SP_1431	1349751	1350941	+	1351006	1460	101.006	65	CAAAAAAUGCUCUGAAACACUGAUUUCAAAGCAUUUUUUG	UUAGUUUAAAAUUACUCCCA	(((((((((((.(((((......))))).)))))))))))	-14.4	6
R4	1351009	1351076	-	1350965	1096	84.3077	44	AAAAAAUGCUUUGAAAUCAGUGUUUCAGAGCAUUUUUUGU	UCUUUCUGUAAAUAAUUUGC	(((((((((((((((((....)))))))))))))))))..	-17.4	7
SP_1433	1351451	1352443	-	1351338	65	5.60345	113	UUUGAAAAAUGGAUAAAAAAAUAAAGGCAGUCCGAAGACC	GCCAAUAUUUAUCUCUCUGC	..........((((...............)))).......	-2.2	0
SP_1435	1354341	1356062	+	1356074	13	13	12	CAAAAAUGGCAGAAGAAUUUAUUUAUUAGGAGGACUACAA	UGGAUAAUAAAAAAUUAAAA	..........................(((.....)))...	-0.4	1
SP_1438	1357148	1358272	+	1358319	101	9.18182	47	UCCAGAAUCCUUGCCUUAGCUUAGAUCCUGGAUGGUUUCU	UUUUUCACCCAAUGGGUGUU	(((((.(((...((....))...))).)))))........	-9.7	5
srn319	1360540	1360646	+	1360676	2127	54.0346	30	ACUAGAGAACUCACGGAUAGUUCCUAAUCUGGAGAUUUCU	UAUUUGCACUUUUCUUGUAC	...(((((.(((.(((((........)))))))).)))))	-10.9	4
SP_RS12250	1360675	1360818	-	1360622	11	11	53	UAGGAACUAUCCGUGAGUUCUCUAGUCUGGAGAUUUUUCA	AUAGACUUCGUUAUUGGACG	..(((....)))(.(((.((((((...)))))).))).).	-7.4	5
SP_1442	1362492	1362842	-	1362474	133	133	18	AGAAAGUCGUGAUUUCUAUUGAAAUGAGGACUUUCUUUUU	AGUUAUAAUAAAGUUAGGAA	((((((((.(.(((((....))))).).))))))))....	-16.5	7
SP_1444	1363255	1364511	+	1364601	20	20	90	UAUAUCAAAAGACCGCAGCUUGAAAACUACGGUCUAAUUU	UUUGUCCAAAUGUAAACCAC	.........((((((.((........)).)))))).....	-9.4	5
SpR18_sRNA	1364575	1364706	-	1364566	14064	83.1341	9	ACAAAAAAUUAGACCGUAGUUUUCAAGCUGCGGUCUUUUG	AUAUAUAUAAUGAGAAUUAA	..........(((((((((((....)))))))))))....	-15.7	5
SP_1445	1364734	1366296	-	1364632	371	8.37262	102	GAUUAAAACGGGAACAUUUGCUAAAAAGAAUAAAUUGAAU	AAUAGUUCCAAGUGGUUUAC	........................................	0	3
SP_1446	1366438	1367136	+	1367180	2234	53.0851	44	ACCACGCAAAAACUCUCUGUCACGGACAAAGAGUCUUUUU	UAUUUUUCUAAGAAUAAAUC	...........(((((.((((...)))).)))))......	-8.4	6
SP_1447	1367179	1368075	-	1367145	272	16.4848	34	AAAUAAAAAAGACUCUUUGUCCGUGACAGAGAGUUUUUGC	GUGGUAAUCUAAUUAUUUUC	.......((((((((((((((...))))))))))))))..	-16.3	5
SP_1448	1368084	1369019	-	1367968	329	25.5259	116	GAGUGGCCAAUACCUAAUGGCACACGGAAUUUCGGCUCUG	GUCUUGACUAACUUGCGUCU	..(((((((........)))).)))...............	-8.8	2
SP_1449	1369016	1369741	-	1368946	2307	68.8325	70	AACAAAUCGAGGCAGGGAUUUAUCCCGGAGCCUCUUUUGC	GUAUUUUAAGGACAAUCAAU	..((((..(((((.((((....))))...))))).)))).	-15.2	5
SP_1451	1370462	1371289	-	1370435	40	3.55556	27	AAAAGGAGAAUGAAGUGGCAGUACAGUUAUUAGAAAAUUG	GCUCCUAAAGGAACAAGAAA	.............((((((......)))))).........	-2.6	2
SP_1452	1371311	1371646	-	1371170	75	3.82353	141	AAAGAUUUUAGAUCAGUUGGAUCAAAGGGGCAUUCGUUUU	GUCAUUGCGACGGGCAAUGA	..........((((.....)))).................	-3.1	6
SP_1455	1372518	1372709	-	1372385	102	5.88462	133	GACUAAGCAAAAGUCUCAGGAGUAGGAAGAGGAAAAAACU	GCCAGAAUUAUGGCCCACGG	((((.......)))).........................	-2.4	1
SP_1456	1372898	1373509	+	1373540	19637	243.215	31	UCUUGAAUAAAGAAAAUCCCGUUGCAAGACGGGGUUUUGU	GUUAUAAUAGAGGCAUGAAA	.(((.....)))(((((((((((....)))))))))))..	-14.4	5
SP_1457	1373554	1374282	+	1374315	458	12.3045	33	GACUAUAAAAAAGUUUCCAGUCAUCUGAUUGGAAACUUUU	UUAUGAUUAACUAUGUUCUG	........((((((((((((((....))))))))))))))	-16.7	4
SP_1458	1374321	1375232	-	1374279	5924	172.632	42	AUAAAAAAGUUUCCAAUCAGAUGACUGGAAACUUUUUUAU	AGUCUAUUUCGGAAAACUUC	(((((((((((((((.((....)).)))))))))))))))	-16.7	7
SP_1459	1375298	1375534	-	1375231	802	29.3074	67	AGAAUAAAGAUAGUUACAACAAGAAAGAAGGAAUCUAUAU	GUACGAUACUAUUAUUAUCG	........................................	0	4
SP_1460	1375600	1376343	-	1375549	1487	30.4566	51	AAGGAAAACUCAGUUAGUUGGACUAGCUGAGUUUACUCUU	UAAAAAAGAUAGAAAUGAGA	..((.(((((((((((((...))))))))))))).))...	-16.6	5
SP_1461	1376343	1377143	-	1376326	29	2.18593	17	AUGUGAAAGGAGACCUUCGUUAAUGAUUAAGAUUUCGAAU	UUAAGCAAAUCCUUUUCAGG	.........((((.(((.(((...))).))).))))....	-2.6	4
SP_1462	1377301	1377657	-	1377184	312	18.4808	117	UCUGUAUCUGACCGUAGCAAAUAAUUUCAUUGACGGCAGA	AGCAUGGUAGAAUGAAUCAU	......((((.((((..(((.........)))))))))))	-7.5	0
SP_1463	1377651	1378181	-	1377571	68	4.19439	80	AAAACAAGAAUUAAAUCAAUUAGGUGUGGACUAUAAAGCC	GUCCAUAUCGUGGAAGAAAC	......................(((....)))........	-0.7	1
SP_1464	1378181	1378675	-	1378167	168	11.2941	14	UGGCCUAUCAAAAAUUAAAGAAAUAAUGCAAAAGAAGUAU	GUAAAAAUCCUCUACUCCUC	........................................	0	2
SP_1465	1378810	1379256	+	1379352	571	27.9003	96	CGUGACCCAUGCUGUGGGUGCAGUCAUCAUGCUUAUCUUG	CUGCCUAUUUCAUCCAUCUA	....((((((...))))))(((.......)))........	-9	5
SP_1466	1379253	1379900	+	1379934	5115	22.5828	34	CAUGUAAAAAAGUUGAGAAAUUCAAUCUCAACUUUUUUCU	UUACACAUAUUGAUAAAGUA	.....(((((((((((((.......)))))))))))))..	-13	7
SP_1467	1379921	1380502	-	1379896	17000	309.091	25	AAAGAAAAAAGUUGAGAUUGAAUUUCUCAACUUUUUUACA	UGUAAUAAACAAUAGCGAUG	....(((((((((((((.......)))))))))))))...	-14.5	5
SP_1468	1380503	1381378	-	1380465	62	3.28644	38	AGAUGAAAAUCGGAAUAUUGGCCUUGCAAGGGGCCUUUGC	AGAACAUGCAAAAGUGCUAG	.(((....)))........((((((....)))))).....	-9.9	3
SP_1469	1381530	1382909	-	1381485	85213	263.783	45	AAUGAGCUAUCUGGCCUUAAGUUAAGGUCAGAUAGUUUUU	AGCUAAUUUGUCCCCAUACA	...((((((((((((((((...))))))))))))))))..	-21.2	6
SP_1470	1383203	1384126	+	1384187	124	6.36607	61	UUUUAAAAUUGUAUUAUGUAAAAAGAGAAAGGAAAUCUCA	UGUUAAAACUUAUUGCUAUU	........................((((.......)))).	-2.7	2
SP_1471	1384186	1384791	+	1384813	164	11.9273	22	UGACUGGGAAAAUUUGUAAGAUAGGAGACCAAAAAGAAUG	AAAUUUGUUGGACUUGUUGG	....(((.....................))).........	-1.1	1
SP_1472	1384810	1386054	+	1386088	1238	61.9	34	UUACUAAUGAUAGUUUUUAGGAACCAUUAUGGUUCCUUUU	UUAGCGAAAAAAGACUAGCA	..((((....))))....((((((((...))))))))...	-10.7	6
SP_1473	1386277	1386534	-	1386174	92	4.38455	103	CUGCGGCUAGCUUCCUAGUUUGCUCUUUGAUUUUCAUUGA	GUAUAUGUAUUCUUUCUUUU	..((((((((....)))).))))((..(((...)))..))	-6.3	4
SSRC8_2	1388668	1388725	-	1388601	135	6.28183	67	AUAAAAAGAUACUUUUCGGAGAAAAAACAUGACAAAAAAC	UUAUUAGUAGAACUCGGUCU	............(((((...)))))...............	-0.2	0
SP_1475	1388824	1389741	-	1388678	645	23.0842	146	GACUUUUGGCUCCAAUUUUAGCAAUGAAACAACGAAGUUG	GUUGCUUGCGUGCCAAUCAC	((((((((..((.............))..))..)))))).	-2.7	2
T-box	1390945	1391107	-	1390908	6616	166.79	37	AGGUUAAAUCAACCUAGGAUUGUCAGAUGUGGUUCUUUUG	CUUAUUCAGUCUAUUGUGUG	(((((.....)))))(((((((.(....))))))))....	-4.4	6
SpR19_sRNA	1390953	1391074	-	1390908	6616	172.471	45	AGGUUAAAUCAACCUAGGAUUGUCAGAUGUGGUUCUUUUG	CUUAUUCAGUCUAUUGUGUG	(((((.....)))))(((((((.(....))))))))....	-4.4	6
SP_1478	1391145	1391987	-	1391130	375	20.0617	15	ACGAGUUGAUGAUGUGGAUUUCUAGAAAAUCAUAAAAAGA	AUUGUACAUUAUUCUAAUUU	......((((..(.(((....))).)..))))........	-3.9	1
SP_1479	1392101	1393492	-	1392055	9838	149.14	46	AAAAAUAGGUCUGUUAGAUAUUUGACAGACUUAUUUUUUA	CAGAAUAUAGUACUACUUAA	(((((((((((((((((....)))))))))))))))))..	-17.1	6
SP_1480	1393727	1394080	-	1393623	633	26.1128	104	GGUCUACUAUUCUAGCUUCAAUCUACUAGAAAUUCCAUAG	AUAGAAAACUACAUAAUCUC	.........((((((..........)))))).........	-3.7	3
SP_1482	1394235	1395296	+	1395383	54	3.20339	87	UUUCCAAGAAUUCACCCCCAUUCAAACUCAACUAUUUGAG	CCCCUUCUUGCUGGAGAAAA	.......((((........))))...(((((....)))))	-3.1	4
SP_1483	1395293	1396375	+	1396417	5492	130.435	42	GCCCCAUUGCUCUAUACACAUCCAGUGUAUGGAGCUUUUU	UAUAAGCAAUUCAAUUUUAU	........(((((((((((.....))))))))))).....	-16.9	5
SP_1485	1397026	1398297	-	1396896	49	49	130	GAGGCUGGUUUCGGUAGAAUCAGUAAACUGGGAUCUUGUU	GGUCUCCAAUAGGAGUAGGU	..(((.(((((((((...........)))))))))..)))	-7.1	5
SP_1487	1398351	1398689	-	1398301	54	2.32759	50	AAAAGUUAGACAGAAAAAAUCUAACUUUUGGGGUGUUUUU	AUUAUGAAAUUAACUUAUGA	((((((((((.........))))))))))...........	-7.6	6
SP_1489	1399336	1400532	-	1399261	266767	265.704	75	UAGACACUAAAAGAAUCUUGCUUGGCAAGGUUCUUUUUUU	AGAUAUUGAACUAAUACUCA	........(((((((((((((...)))))))))))))...	-14.1	7
trn0674	1401387	1401457	-	1401381	35658	225.256	6	UCUAUAAGUAAGAGAGGAUCAGACUGGUUCUCUCUUUUUG	AUUUUUUAGGGAAAUGAAAG	.........((((((((((((...))))))))))))....	-13.9	6
SP_1491	1401454	1402323	-	1401381	35658	547.382	73	UCUAUAAGUAAGAGAGGAUCAGACUGGUUCUCUCUUUUUG	AUUUUUUAGGGAAAUGAAAG	.........((((((((((((...))))))))))))....	-13.9	6
SP_1498	1406020	1407738	+	1407779	21482	242.695	41	AGACCUAUAAAAGAUGAGACCAACCAACCUCAUCUUUUUU	CGUAUCAAAUCUAAGCAAUU	........((((((((((..........))))))))))..	-9.9	7
SP_1499	1407849	1408196	+	1408273	40453	215.839	77	AUAAUGUAAGGUGCAAAAACCUUGAUAUUAUGCGUUUUAU	UGUUCCUAAAACAGUUACAU	((((((((((((......))))).))))))).........	-9.1	5
F45	1408204	1408275	+	1408276	960	11.4558	1	AUGUAAGGUGCAAAAACCUUGAUAUUAUGCGUUUUAUUGU	UCCUAAAACAGUUACAUCAG	...((((((......))))))...................	-5.9	6
SP_1500	1408475	1409311	-	1408425	15133	202.325	50	UGGCUGAAACUGCGUUUUGAUUAGCAAAACGUAGUUUUUU	UUGUAAUCUAGGAAAACGAU	.....((((((((((((((.....))))))))))))))..	-15.9	6
SP_1501	1409324	1409953	-	1409310	791	30.4231	14	UAUUAUUGAAAGUAGAACCUAAAUAGGAGGAAAAAUGGAU	GAAAAAAUGGAUGCUUGUAU	.................(((....))).............	-1.2	2
SP_1502	1409963	1410604	-	1409952	254	11.2152	11	UUGAGAAGAAGUAUAGUUAUUAUAGAUAGGAGGCUGCCAU	GUUAGAAUUACGAAAUAUCA	.........(((....(((((...)))))...))).....	-1.3	2
SP_RS12275	1410735	1410848	-	1410695	18	18	40	UAGAACUGUAGUUUAUCUCUUUUGAUAGCUACGGUUUUUA	UUUGUAUAUGGUAGAAUCUU	.((((((((((((.(((......)))))))))))))))..	-14.9	5
SP_1504	1412458	1413669	-	1412355	654	17.6228	103	UCAUGAGCCACUUUCUUCCUCCUCAUGAGGUCAGUUUUAC	UUUCUGCUGUUCCAGUAUCG	(((((((..............)))))))............	-6.3	4
SP_1505	1413677	1414843	-	1413619	84	4.57781	58	UUUGGAGGAGCAAGAUUUAACUAAGGCUGAGCAUUAUUUC	GCCAAAGCUUUAGAAAAUGA	..((....(((.((......))...)))...)).......	-1.3	5
SP_1506	1414987	1416000	+	1416045	4883	120.074	45	CCAUAAAAAAUGAACUUGGUAUUUUCAAGUUCAUUUUUUC	UUAUAGUCUAUUUCCGACAU	....(((((((((((((((.....))))))))))))))).	-15.1	6
SP_1507	1416045	1416464	-	1416007	38265	61.1123	38	AAGAAAAAAUGAACUUGAAAAUACCAAGUUCAUUUUUUAU	GGUGUUUUAAGGAGCAAAAC	...((((((((((((((.......))))))))))))))..	-14.4	7
SP_1508	1416475	1417881	-	1416463	455	11.4526	12	UGCAAAAGCUGAAAAAAUGGGAUUUUAAGAGGUGAUCUAU	GGCUCAGUUAACUGUCCAGA	.((....))..........(((((.........)))))..	-2.5	4
SP_1509	1417967	1418845	-	1417949	1651	28.4272	18	AGGUGCUAGUGCCUUAGAAUAGGCUCUAGUCCAGCUCGUA	UGAAAAUGAACUUAGGACCU	.((.(((((.((((......)))).)))))))........	-14.9	2
SP_1510	1418861	1420366	-	1418712	752	9.36784	149	AGCUAGGUCGUUCUGAAGAAGCUGCUCGCAACUUCCAAGU	UUACGCUCAGAAAGUGCGUA	.(((.((..(((.(((.(......)))).)))..)).)))	-5.3	3
SP_1511	1420381	1420917	-	1420324	189	5.36416	57	GCAAUUAACGCACAAGAAAUCAGCGCUUUAAUUAAGCAAC	AAAUUGAAAAUUUCAAACCC	((((((((.((.(.........).)).))))))..))...	-4.6	1
SP_1512	1420917	1421411	-	1420838	4297	25.5474	79	UGCCUUUUGUCCAAUUGGUACUUGAAAAAGGAGAAGAAGA	CCGUAUCUUUUCAGACUUGA	..((((((((((....)).))....)))))).........	-5.3	0
SP_1513	1421425	1422141	-	1421406	1524	26.0094	19	AUUAAUAUUGAAGAGGAAUAGAAAGGAGUAACUGAUGCAC	GUAACAGUAGGUGAAUUAAU	........................................	0	2
SP_1514	1422176	1422376	-	1422068	434	7.59725	108	GUCCUGUUAUCUUCAAUCUGACUAUGUUAGCCAUGACUUU	GUUGAUUGUGGGAGUUAUUU	............(((..(((((...)))))...)))....	-2.6	4
SP_RS07460	1422451	1423457	-	1422375	36	2.34146	76	ACUAAGUAAGUAAAUUUUAUUUUAAAGGAGAAUUUGUUAU	GAAUUUAACAUUUUUAGGCU	.....((((.((((((((..........))))))))))))	-1.7	6
trn0696	1423633	1423714	-	1423633	2020	107.733	0	UCUCUAUCUAUUAAUCCGAGAUUCCCCUCUCGGAUUUUGU	GUUGCUUUCAUUAAAUUUAC	............(((((((((......)))))))))....	-11.9	5
SP_RS12280	1423690	1423827	-	1423633	2020	106.316	57	UCUCUAUCUAUUAAUCCGAGAUUCCCCUCUCGGAUUUUGU	GUUGCUUUCAUUAAAUUUAC	............(((((((((......)))))))))....	-11.9	5
SP_1516	1423902	1424384	-	1423842	57	4.11552	60	ACAAAGAGAGGCUCGCACAUAAGUAUGGAGGUGGACUGAU	GUAUAUGAGUAACUAUCGAU	....((...(.(((.((........))))).)...))...	-3.1	2
SP_RS12285	1424428	1424751	+	1424806	22	22	55	GAGUGAGUGAAGCACAUCGCCUCCCCACUCCUUUUUCUGU	UUUUAGGCUGUUUUUUCAAC	(((((.(.((.((.....)).))).)))))..........	-9.2	6
F54	1424517	1424756	+	1424806	22	22	50	GAGUGAGUGAAGCACAUCGCCUCCCCACUCCUUUUUCUGU	UUUUAGGCUGUUUUUUCAAC	(((((.(.((.((.....)).))).)))))..........	-9.2	6
SP_1517	1424808	1425290	-	1424757	7870	137.997	51	GGAGUGGGGAGGCGAUGUGCUUCACUCACUCCUUUUUCCA	UUUUGCUACUCUUCGAAAAU	(((((((((((((.....))))).))))))))........	-20.7	5
SP_1518	1425361	1427016	-	1425323	6032	141.267	38	AAACAAACUAAAAUUAUGUGAUACUUCACAUAAUUUUCUU	UAGAAAAUAUUAUCAGAAGA	.........((((((((((((....))))))))))))...	-11.5	6
SP_1520	1427588	1428052	-	1427488	54	3.11332	100	UUUCGGUCGAAGAAGCCAUUCCUCCUUCUGUCUUUGAAGC	ACAUUUGAGAGAAAUUCAGA	((((((....(((((.........)))))....)))))).	-5.5	3
SP_1521	1428062	1429396	-	1427913	675	27.2933	149	CCCAUAUUUUAGAAGAAAGUAUCCGUAAGUGUGCGGAUAC	CUUUCUUCUAGCUAGGGAUG	..................(((((((((....)))))))))	-11.1	1
SP_1522	1429407	1430024	-	1429397	259	10.8747	10	GAGUUGAAUCUGACCAGAAUGACAGAAUAGGGGAGAAAAC	AUGUCAAAGACAUAUCAUUU	........(((..((..............))..)))....	-2.8	0
SP_1523	1430072	1433170	-	1430023	72	4.86486	49	ACAAUACGCUAUAAUGAAGUGUUGAAAGGAAAUAGAAAAU	GAAACAAGAACGAUUUCCAU	.((((((...........))))))................	-4.4	2
SP_1524	1433263	1434429	-	1433219	603	37.6875	44	CCAGCCUUCUAGGAGAAAAGUCUUCCUAGAAGGCUAUUUU	CAUAGGCGAAAAUAUGGUAU	..((((((((((((((....)).)))))))))))).....	-21.1	5
SP_1526	1435689	1436810	-	1435625	489	48.9	64	UUAUAGUCUAUUAAAGGGAGCAGGAAAAACUCCCUUUUUA	UAUAGUUUGAAACUAUAACU	............((((((((.........))))))))...	-9.7	5
SP_1527	1437536	1439494	-	1437444	3147	103.444	92	AAUAUCAGGUAUAUAAAAUCCUAGAUGUUAUGCGUUUUGU	UAUAGGAAGAUUUAUUAGAU	(((((((((..........))).))))))...........	-5.8	5
SP_1529	1439697	1441319	-	1439627	7156	309.361	70	GAACAAUCUUUUAGGAGAACUUGAAACUUAUUCCUUUUUU	AGCGUAAAAAUAGCUAAAAU	........(((((((....)))))))..............	-2.5	6
SP_1530	1441425	1442870	+	1442914	1797	113.734	44	UAGAAAAAAUCAAGGGAAAAUGAAACCCUUGAUUUUUUCC	UAUUCUUUAGUAAAAACGUU	..((((((((((((((.........)))))))))))))).	-17.8	6
SP_1531	1442913	1443110	-	1442877	5951	43.6457	36	AUAGGAAAAAAUCAAGGGUUUCAUUUUCCCUUGAUUUUUU	CUAUUCUUAUAAAUAAUUUU	.....(((((((((((((.........)))))))))))))	-14.8	6
SP_RS07545	1443211	1443807	-	1443114	39	2.46316	97	UAACCGGUAACACAUAUCGGAAUAAACUAAAGGAGACAAU	CAUAUGUCACUUGAAAACAA	...((((((.....))))))....................	-5.6	1
SP_1533	1443844	1444356	-	1443740	54	3.15789	104	AUGUGAUUCUACGGGAAAUUAAGGCUCAAUUUCCAGAUGU	UGCAGUUGAUAAACUCAUGG	.............(((((((.......)))))))......	-5.2	2
SP_1534	1444442	1445377	-	1444370	8049	269.297	72	UAGUUUGCCUUAUAUCGCAAGGAGUUUCGGCUCCUUUUUU	CUAGGAGUGAAGUAUGUUAG	.....(((........)))((((((....)))))).....	-8.8	6
SP_1535	1445448	1445747	-	1445435	18541	253.119	13	UUUGAAGAAUCGUGGGGAGUCCUUUGACUCCUCUUACCUU	UGUCAAAAAGCGAAAAAAAU	.............((((((((....)))))))).......	-12.4	4
SP_1536	1445737	1446486	-	1445679	111	5.27145	58	GGAGUGUCGUGAUGGAUCCUACUAUAUAGGCUAUACGACU	GAUAUGAGAAGACGCCUCGC	.....((((((.(((..((((.....))))))))))))).	-10.4	2
SP_1537	1446540	1446899	-	1446432	201	8.16026	108	UUAUUAAAAUCAGGAGAGCGCAUUAACCAGCUCUUUUCGA	CAGAUAUCAAAAUCAUUCAA	.........((((((((((..........)))))))).))	-8.7	4
SP_1538	1446901	1448301	-	1446898	219	9.20684	3	AGAUGUUGUAAUUGAAACUAUUGAAAUCGAGGACUAAGAU	GAAAAUCGGUGAUAAGCUAA	.......((..((((...........))))..))......	-1.6	2
SP_1539	1448596	1448835	-	1448568	155581	152.97	28	AACGAAGAUUAAAGAAAAGACCCAGUUGGGUCUCUUUUUC	AUGAGCUUGAAAACAAGAAA	...........(((((.((((((....)))))).))))).	-11.2	6
SP_1540	1448867	1449337	-	1448759	8120	27.5129	108	AAAAAGUUGAUUACAUCGCAGCAAACAAAAUUGAAUAUGU	UGAUUACAAAGAUACUGAGC	.....((((.........))))..................	-1.6	3
SP_1541	1449349	1449639	-	1449331	1026	6.74406	18	GAUCGUCAAAAUUGACGCGUAAGAAGGUAAACUAUGAUUA	ACAAUGUUGUACUUGUAGGG	...(((((....))))).......................	-4.5	4
SP_1542	1449792	1451135	-	1449760	14725	174.812	32	AACCAUAAGAACAGGAAAACGCCCAUGUGGCGUUUUUUCG	AAUUCUAGUGUUUUUACUUG	.............((((((((((.....))))))))))..	-11.1	6
SP_RS07600	1451154	1451444	-	1451095	56	3.25902	59	UGACAAAACGUGUAACGAUUAUUGACGUAAAAGACUAUGU	UGGUCAGGAAGUGACGAUUG	.......((((.............))))............	-2	3
SP_1544	1451512	1452699	-	1451451	179	6.17005	61	GGAUUUACAAAUUUCAUAAGGAUUUUAUAGGAGUUUUCUC	GCUCCUUUGGACUAUAAAUU	........(((((((((((.....)))).)))))))....	-3.1	5
SP_1545	1452696	1453127	-	1452602	129	5.9604	94	CCCGUGCCAAAGCACUGAAGGCUGAGGGUAGAGAUAUUUU	GUCUCUAACCUUGGGUGAGC	(((..(((...........)))...)))............	-7.6	5
SP_1546	1453505	1454053	+	1454196	224	9.18482	143	AUAUACGGUAAGGCGACACUGACGUGGCUUGAAGAGAUUU	UCAAAGAGUAUAACAUAAUA	..........((((.((......)).))))..........	-6.4	3
SP_RS11495	1454064	1454281	+	1454282	11	11	1	ACUCAGAAGACUAGCUUGUUCGCUUUUUUCUCAUUUAUAA	ACUAAAAUAGCUGAUGAUAC	....((((((..(((......))).)))))).........	-5.9	4
F46	1454220	1454277	+	1454277	56	5.09091	0	CUGACACUCAGAAGACUAGCUUGUUCGCUUUUUUCUCAUU	UAUAAACUAAAAUAGCUGAU	.........((((((..(((......))).))))))....	-5.9	5
SP_1547	1454330	1455058	-	1454213	442	29.1138	117	GUCUUCUGAGUGUCAGAAAAGUAGUCUUGUUCGCUUUUAU	UAUGUUAUACUCUUUGAAAA	...((((((...))))))......................	-4.5	5
SP_RS07630	1455137	1455316	-	1455102	2349	33.8961	35	AAUAAAUAGAAAAACCUCGGUCAAACCGAGGUUUUUCAAA	UGAAUUUCUUGGUUGUGGCU	........(((((((((((((...)))))))))))))...	-19.5	4
SpR20_sRNA	1455141	1455185	-	1455102	2349	37.8871	39	AAUAAAUAGAAAAACCUCGGUCAAACCGAGGUUUUUCAAA	UGAAUUUCUUGGUUGUGGCU	........(((((((((((((...)))))))))))))...	-19.5	4
SP_1548	1455368	1456963	-	1455300	192	9.36973	68	UAUAAUAAGGUAAAUUAAGCCUAAUGGAGGACAAAGAAAU	GGGUUUUUAUUUGAUGGUUG	.......((((.......))))..................	-2.9	1
SP_1550	1457501	1458292	-	1457470	10575	214.136	31	AUUAAAUAGCAAAAAAGUCAUCUUCGGAUGGCUUUUUGCU	ACAGUUGAGGGAAAGGGUUU	.......((((((((.((((((....))))))))))))))	-15.1	6
SP_1551	1458305	1461001	-	1458231	35	2.1875	74	CCGUAUGGCAGGAUGAAGCUAGUAAUCAAGGAGCUUUUAC	GGGGCUAAACAGACCAACAG	((........))..((((((...........))))))...	-4.9	4
SSRC10	1461067	1461188	-	1461066	45	3.92857	1	UAAACAGCGAGACUUGUUAUGAUUAACAGGUUUCUUUUUG	UUUGUCGUGAAAAGCUAUGA	........(((((((((((....)))))))))))......	-12.7	6
SP_1552	1461305	1462489	+	1462522	1329	17.9364	33	AAGAAUAGAGAAAUCCUUUCAUGAGACGGGAUUUUUCUAU	UCUUUUAUACUCAAUAAAAA	....(((((((((((((.((....)).)))))))))))))	-15.7	6
SP_1553	1462632	1464503	-	1462535	1581	68.5448	97	AGCCUGUGACCGGCUUCCUAAUUUGCACUUUGAUUUUUAU	UGAGUAUAAAAGAAUAGAAA	((((.......)))).........................	-3.8	6
SP_1554	1464500	1465699	-	1464363	77	4.39339	137	AAUCGGUGUCAAUGGGACUGGCAAGACCACCCUUUUGGAC	GUCCUUUCUGGUGUUUCUGG	........((((.(((..(((.....))))))..))))..	-6.7	4
SP_1555	1465696	1466463	-	1465656	12764	92.3486	40	GAUUAACGCAAAUGCCUUCUGAAUUUCAGAAGGCUUUACC	AGUAUUAGAAAAAAUUAAAG	.............(((((((((...)))))))))......	-14	3
SP_1557	1466740	1467588	-	1466596	2064	53.2783	144	UGCCAUUCCCUAUUUUUCAGAGGCAGCUAAGGUCCUUUGU	AUCUUGAUAAUUGAACACGC	.................((((((..((....)))))))).	-5.7	5
SP_1558	1467590	1467976	-	1467461	331	16.1463	129	UCAAUAUUGAUGGUGAGGAAUAUGUCGAAGGCAUCAAUCU	GUCUGCUGAGGAAUUUUACC	.....(((((((.(...((.....))...).)))))))..	-7.4	3
SP_1559	1468038	1469390	-	1467942	251	8.09899	96	AGCCGAUGGAGAAAGACAUGAAUCUUAAACGUGAACAAGA	AUUUGUUAGUCAGUAUCAUU	.....(((....((((......))))...)))........	-1.2	0
SP_1560	1469414	1470193	-	1469283	144	5.41393	131	CUUUAAACUAGGACGUUUUGGAGGCUAUGUUCUUAGUCAA	CAUGAAACGGAAGCGCCGAA	......((((((((((..........))).)))))))...	-6.5	3
SP_1561	1470180	1471037	-	1470131	966	39.2998	49	CAUAUCCUCACUCUUUUUUGCUUGUGUCUUAUUUGUCUAU	GCUACGGCGACGAAUUUUCA	........(((............)))..............	-0.4	5
SP_1563	1471173	1472138	+	1472176	1095	23.6331	38	UAAAAAAGAACCACGAGUCACAUAGGAUUCGUGGUUUUAU	AAUUCAUCCGCUAUCUUAUU	......(((((((((((((......)))))))))))))..	-18.3	5
SP_1564	1472172	1473083	-	1472139	11150	96.1207	33	AUUAUAAAACCACGAAUCCUAUGUGACUCGUGGUUCUUUU	UUAUAAACUAGUAGAGUGUU	.......((((((((.((......)).)))))))).....	-11.6	6
SP_1565	1473080	1474057	-	1473078	74	4.50435	2	UGGACGAGUUGAUGCGCAUUAUACAGGUGAAAAAAUGAGU	UUCACAGUAGCAGUAAAAGA	...((..(((....(((.........)))....)))..))	-2.4	2
SP_1566	1474054	1474944	-	1473922	77	4.28319	132	GUGACGGUGGCAGAUGAUGGUGGUUCUUCAGGUGAACUCC	GAAAAAAUAUGCAACAGUUG	...((.((........)).))(((((.......)))))..	-5.4	2
SP_1567	1474996	1475376	-	1474961	19210	268.286	35	GAUAAGCUAGUUGAAGUUUGGUGUUGCCAAACUUCUUUUG	AUAUAAGGAGAAAAAGAUGA	............((((((((((...)))))))))).....	-12.6	6
SP_1568	1475387	1475980	-	1475375	249	10.1498	12	UUGGGAUGCAAUCUUAGAAAAAUUGUGAGGAAAAGAAAAU	GGCAAAAACAAUUCAUACAG	(((((((...))))))).......................	-2.1	1
SP_1569	1475983	1477215	-	1475973	256	7.91687	10	ACGGAUAAACCGAUCCUAGAAACAGCCUAGAGGUGACUAU	GGAACUUAAUACACACAAUG	.(((.....)))(((((((.......)))).)))......	-6.3	3
SP_1570	1477247	1477417	-	1477214	176	5.8456	33	AUUUUAGAUAGAAUGACAGUAUAGAAUGGAAGGAAAUCAU	GUCUACAAAUAGAAAAAAUG	......(((....(..((........))..)....)))..	-1	2
SP_1571	1477417	1477923	-	1477378	265	7.11189	39	AUGGAACGGAGUUUAUUUGGUCUAUUCACGGCUUUUCUGU	GUUUCAUCUGCUUUCUGGCA	(((((.((((.....)))).)))))..((((.....))))	-4	6
SP_1572	1478053	1478589	-	1478002	318309	45.1447	51	ACAUAGAUAAAUCUGUAGGAAAUUUCUUACAGAUUUUUUC	UAUUUUGUAAGCUAUUCCAA	........((((((((((((....))))))))))))....	-13	6
SP_1573	1479067	1480539	-	1479021	19007	244.575	46	AUUUGAAAGAGGGAUGUGAUAGUAGCACCCUCUUUUUCUU	UGUUUUAUGAUAGUUCAUCC	....(((((((((.(((.......))))))))))))....	-14.2	7
SP_1574	1480609	1481367	-	1480532	187	4.90022	77	AUGUCUGUUACAUUUUUUAUAGGAGAGAAAGAUUGAAAAC	AAAAAUUGGAUUAGCAAGUA	.(.(((.(((.........))).))).)............	-1.8	2
SP_1575	1481465	1482142	-	1481330	214	7.90781	135	AAAUGUCACGUAAACCAUUUAUCGCUGGUAACUGGAAAAU	GAACAAAAAUCCAGAAGAAG	..............(((.(((((...))))).))).....	-4.3	2
SP_1576	1482151	1483095	-	1482141	120	6.66667	10	GAUGAUGCAUCUGCAUAUGGGUAUUUAUAAGAGGAAUUAU	GACAUAUUUAGACGCUUUUA	....((((....))))........................	-3.1	3
SP_1577	1483277	1483789	-	1483247	3719	44.7937	30	GCAUUAUUAAUGAAAACAGUCCCUAGGGCUGUUUUCUCUA	CACUAGGAUAUAAAAAUAGA	...........(((((((((((...)))))))))))....	-14.6	5
SP_1578	1483876	1484634	-	1483835	11	11	41	UAAUUAUUGAAGUUAACUUUUCCUUUUUUCUUUCUUAAAA	AAUAUGCUAUAAUAGAGAGU	........((((......))))..................	-0.3	3
SP_1580	1485135	1486265	-	1485028	6851	228.66	107	UUAAUCUAGGGAGAGAAACAAAAUGCUUCUCUCCUUUUUG	CUAGAGAAGUCAUAUUAUGC	.......((((((((((.((...)).))))))))))....	-13.3	5
SP_2251	1487972	1488057	-	1487937	2853	93.3224	35	CCGCAUAGGAAAAGAGCUAGCUAAAGCUAGCUCUUUUGUA	UUUCUCUAAAAAAUUAGAAU	((.....))((((((((((((....))))))))))))...	-18.7	5
SP_1583	1488139	1488714	-	1488115	46	2.71921	24	UGAACUUUUUGAGUAACCUGGUUGGUGAAAAUGAAAAAAU	UUGAAAAAAAGUGUUGACAA	.....(((((.(...(((.....))).....).)))))..	-3.8	1
SP_1584	1488714	1489502	-	1488698	148	6.03599	16	GAAGUGAAGAAAAGAGAUUACUAAUGACAAAGGCUUUAAU	UUCGAUUGAUUAUACAGAAG	(((((.........((....))..........)))))...	-1.2	4
SP_1586	1489766	1491340	-	1489734	17971	68.9657	32	AUAAAUAAGAAAAAGCGGUUCAAAAUGAAUCGCUUUUUUA	UAUAAGGAGACCGAAUGUGA	........((((((((((((((...)))))))))))))).	-15.7	6
SP_1588	1492958	1494274	+	1494319	8417	75.2587	45	AGAUUUAAUCGUAUCGAACAGCCCUCUUUGGGCUGUUUUU	ACUUCUGCGGAAUCUCAAAU	.(((........)))(((((((((.....)))))))))..	-15.4	6
SP_1589	1494373	1495716	+	1495717	165	7.4186	1	GCUGGCUAGUCGUCAGAUUGUUAGAAAGGAGAUGAACUAA	UGGUUUAUACUUCACUUUCC	.(((((.((((....)))))))))................	-6.8	2
SP_1590	1495716	1496498	+	1496550	5547	167.345	52	UGAUAUCAAAGAACUCCGUUAUCUUGUCGGAGUUUUUUGU	CUUUUCUUUUACCCUUCUCC	......((((((((((((.........)))))))))))).	-15	7
SP_1591	1496624	1497706	+	1497754	5019	96.7985	48	AGCCCCUAUGCUUUCCUUUCAAAAUAUCUAGGGGCUAUUU	UAUUGUCAUUUUUCUGCUAU	((((((((....................))))))))....	-12.1	4
SP_1595	1499265	1500611	+	1500659	17	17	48	UCGAGAUGAAAAAAUCGUGUGACGCACCAAGGGAGGAGUC	UGCCCUUUUGAGGAAAUCUA	.((.(((......))).)).(((...((......)).)))	-3.6	1
SP_RS07865	1500752	1501063	-	1500710	734	45.5194	42	UCAUGAGCCACUUUCUUCCUCCUCAUGAGGUCAGUUUUAC	UUUCUGCUGUUCCAGUAUCG	(((((((..............)))))))............	-6.3	4
SP_1598	1501673	1502446	-	1501562	101	7.34545	111	CAGGAAUUCUAACUCUUUUAGAUGCUGGUGUCUUCUUUGC	GGCCUUUUACUUUGGUAGUC	(((....(((((.....)))))..))).............	-4.4	5
SP_1600	1503503	1504654	-	1503481	3380	61.2202	22	CUUCAGAAGAGAGCUUAGGAUUGAUUCCUAAGUUUUUCUU	UUGAUACUCAAUGAAAAUCA	........((((((((((((.....))))))))))))...	-14.1	7
SP_1601	1504894	1505523	-	1504874	320	8.55927	20	UCAAGAGAAAGUCAUCCUAAUACUCUUCGAAAAUCUCUUC	AAACCACGUCAGUUUCCAUC	..((((((...((...............))...)))))).	-4.4	4
SP_1602	1505526	1505864	-	1505499	90	4.85612	27	GAGGAAGAUUUAAGCAUGUCAAAACACUAUAAACUUGUAU	UUUAUAGCCGUAUCUUCUUG	......(((........)))....................	-0.7	4
SP_1603	1505995	1506666	-	1505956	6558	86.5743	39	AAUGUAGAAAAGCCGAUAGAUUGAUAUCGGUUUUUUUCUA	AAUUUGUCAAAAUGCUGAUU	.....(((((((((((((......)))))))))))))...	-14	6
SP_1604	1506675	1507151	-	1506653	209	9.5	22	GUUAUAAAAAUAAAAUAGGAGCCGAUAUGAAAACAAUUCA	AAUUGCUAUUGAUGGUCCUG	........................................	0	2
SP_1605	1507131	1507409	+	1507538	645	34.8649	129	GAAGGUCACUUUUUUCUUUGAUAAGAUAAAGUGGUCUUUU	UUUAGUCUCUAAAUAAAUCU	((((((((((((..((((....)))).)))))))))))).	-11.5	5
SP_1607	1508427	1509446	-	1508368	24096	288.155	59	GUCCCUUGUUUAAACGAAGAGGAAGUACUUCCUCUUUUUU	AUCAGGCUCUGGAAGCUUUA	...............(((((((((....)))))))))...	-10.4	7
SP_1610	1511651	1512328	-	1511585	68	4.43478	66	GCCCUCAGGAAUUUUCUAUGGAGGGAGACAGCCGUGGUCU	GCAAAUUGGCACUUUAGACA	.(((((.(((....)))...)))))((((.......))))	-10.8	3
SP_1612	1512877	1513869	+	1513990	918	25.7383	121	AAGGAUUUAGUUCUGUAUUGCACAGGGCUAAGUCCUUUUA	GCUUUACCUUAAUUCUCUUG	((((((((((((((((.....))))))))))))))))...	-20.1	5
SP_1613	1513943	1515214	-	1513920	25	25	23	CUAAAUCCUUCGGAUAAAUUAAUUGUCUAACUUUUGGGGU	GCAGUACAUUUUUGGUAUAU	....(((((..((((((.....)))))).......)))))	-4.3	4
SP_1621	1520597	1522060	-	1520569	13	13	28	AACUAUGAAUAAUCUUUCGCUUGUCCUUAUGGAUAUAUCU	GUUCAAAAUCGUCAAGAAGC	......(((......)))...(((((....))))).....	-5.5	4
SP_1622	1522724	1523197	+	1523327	102	102	130	AGCCGCAGAACAAACCACCAGUUCACACUGGUGGUUUUGA	UUUAUUUUUUCGCUUGGUAA	...........(((((((((((....)))))))))))...	-15.9	4
SP_1623	1523328	1525664	-	1523293	4211	75.1964	35	AAUAAAUCAAAACCACCAGUGUGAACUGGUGGUUUGUUCU	GCGGCUAUAAGCCGCUUCUA	.........(((((((((((....))))))))))).....	-17.8	6
SP_1624	1525797	1526546	+	1526583	3374	55.3649	37	AUAGAAGAAAUGAACCUUGGCCAAACAGCUAAGGUUUUCA	UUUAUAUAGUAGAUUGGAAC	...........((((((((((......))))))))))...	-12.8	4
SP_1625	1526838	1527452	-	1526770	6983	194.988	68	CGAGCUCAAAUCAGCUCUCUGAUUUUCAGAGGGCUUUUUC	AUUGAGUAUAAAUGGACAAU	............((((((((((...)))))))))).....	-14.4	5
trn0760	1527461	1527537	-	1527454	139	8.85019	7	AUCUGCUGAUUUAUUACUGACUAAUACAGGAGGUUUUUUU	UAUGGGACAGACAAUCAUAU	((((.(((..(((........)))..))).))))......	-5.6	7
trn0761	1528108	1528175	-	1528108	92416	329.195	0	AUCUUGAUAAUAAAGCUACUCUAAAUUGGGUAGCUUUUUU	GCGUUGUCACCUUACCUCGA	...........((((((((((......))))))))))...	-13.2	6
SP_1626	1528268	1528537	-	1528162	4843	22.6848	106	UCUAGGAGAUUUUAUCUUUUUUGCCAAGUGCUUAGGCCGU	GUUCAAUUGAGCAUAUCUUG	...(((((((...)))))))..(((.........)))...	-4.7	2
S15	1528481	1528597	-	1528369	1294	7.84155	112	AAACAACACAAAAAAGACCACGCUACUUACCGUGGAUUGA	UGAAAAAAAUCGGUCGCCGU	.................(((((........))))).....	-6.3	3
SP_1628	1529535	1529744	+	1529811	67	4.76569	67	UUACUUUACUAUCAUAACCUUUGGUGAGUUUAUACUAAUU	UACUUGCUAAUCUAUGAAAC	....(((((((..........)))))))............	-3.2	4
T-box	1529938	1530141	+	1530156	1295	42.6497	15	UGGAACCACGUUGCGACGUCCUUUCGAGGAUGUCGCAUUU	UUUUAUUAGGAUACUAAUUA	...........(((((((((((....)))))))))))...	-18	4
SP_1630	1530175	1530403	+	1530501	125	6.48789	98	AUAAAGAAAAGCAAUUGAACGUUAGGACUUGGAAGUAGUC	UGCUGAUAAAAAAUCAAUGC	.........................((((.......))))	-1.6	2
SP_1631	1530556	1532499	+	1532537	1796	100.105	38	UAAGAGUCUAGCAUAAAAGCCUCCAAUCUGGAGGCUUUUU	CUCAUCUAUUUUUACUCAAG	..............(((((((((((...))))))))))).	-15.5	5
SP_1632	1532548	1533522	-	1532508	295	15.5263	40	AAAUAGAUGAGAAAAAGCCUCCAGAUUGGAGGCUUUUAUG	CUAGACUCUUAUUUCUCAAC	............(((((((((((...)))))))))))...	-16	5
SP_1633	1533515	1534192	-	1533486	37	2.84615	29	AGCAUGCUUGAUUGGAAACAAUUUUUUCUAGCCUAUCUGC	GCUCCCGUAGUCGUCUUUUU	.(((.(...(.(((((((......))))))).)...))))	-4.1	3
SP_1634	1534348	1535421	+	1535497	151	11.7969	76	CCUAGAAUACAUACUUUCAUGUGCAUUCUAAGUCUUUUUA	AAUAGAAUCUAAUAGUCAAU	..((((((.((((......)))).))))))..........	-6.3	6
SP_1635	1535512	1535814	-	1535448	37	37	64	UUAGAAUGCACAUGAAAGUAUGUAUUCUAGGUCUUUUGUU	UUGUAUACAUUUAAUUUUCA	((((((((((.((....)).))))))))))..........	-9.1	6
SP_1636	1535882	1536319	-	1535856	3237	77.2554	26	AGAUGAAGGAUUAAGAGGGAUAAAUGCCCUCUUUUUUCUU	UGGAUAAUUAUGAUAAAAUG	.....(((((..(((((((.......)))))))..)))))	-14.3	7
SP_1637	1536395	1537243	-	1536337	61	3.30368	58	UAUAAUAAUAGAAAAAGAAGAGUAGAGGCAGGGUAGCCUC	GUAAAAAGGAGAAGAGGAUG	........................(((((......)))))	-7.5	2
SP_1638	1537349	1537999	+	1538109	1988	88.3077	110	AGCUAAGCUCGAGAAAGGACAAAUUUUGUCCUUUCUUUUU	UGAUAUUCAGAGCGAUAAAA	..........((((((((((((...))))))))))))...	-14.8	7
SP_1644	1541278	1541721	-	1541244	2481	102.946	34	AGAUAAGAAAGACCAAGCCCAGUCGGCUUGGUCUUUCUCA	UCUAUCAUAAAAUACUCCAA	.....((((((((((((((.....))))))))))))))..	-23.7	4
SP_1645	1541751	1543973	-	1541720	53	2.69492	31	AACGGCUAGUUGUCCUAGCUCUUACUAGAAAGGCUAUUAU	GAAAAUCAUUAUCCAACGGG	...((((((.....))))))....................	-6.4	4
SP_1646	1544950	1545561	+	1545662	1975	99.0803	101	CAUCCUAUCAAGGUUUUCACACAUGAUUGGAUGCCUUUUU	UCUGAUGACUAGAUUUUUUG	(((((.((((.(((....)).).)))).))))).......	-8.7	5
SP_1647	1545684	1547576	-	1545614	18582	209.231	70	AUCCAAUCAUGUGUGAAAACCUUGAUAGGAUGCCUUUUGU	AAUAGAAAGAUUUGCUGGAU	((((.((((.(.((....))).)))).)))).........	-8.2	5
SP_1648	1547867	1548589	+	1548690	135	4.46913	101	CUAUUGUCGUCGGGAUUGUAGCUGGAGCUGUGGGAUGUUU	CAUUAUUCUACGCGGGAUGU	((((.(.(.((((........)))).)).)))).......	-6.2	4
SP_1649	1548586	1549434	+	1549467	242	9.34608	33	UAAAAUAAGGGGCAAAGCCCUAAUAAAUUGGAGGAUCUAA	UGAAAAAAUUAGGUACAUUA	........(((((...)))))......(((((...)))))	-7.5	2
SP_1650	1549466	1550395	+	1550438	27687	104.435	43	CUAUGAAAAACGUCAUUCUCACAUGAGCUGGCGUUUUUUC	UAUGCCCAUAUUUCCGGUCA	....(((((((((((..(((....))).))))))))))).	-13	6
SP_1651	1550518	1551009	+	1551064	2017	34.5771	55	CACAAAGAGUUCCCUGCUCUUUGAAACGGAGGAUUUUUGA	AUAUUAGUAAAUAGAAGUUC	..((((((((.....)))))))).................	-9.3	5
SP_1652	1551105	1553813	-	1551008	268	24.3636	97	UCAAAGAGCAGGGAACUCUUUGUGACAGAGGAUUUUUUCU	AUAGGGCUUUAGCAGCUGCA	.(((((((.......)))))))......((((....))))	-6.7	7
SP_1653	1553815	1554516	-	1553784	11	11	31	GAGUACUAGCAUGAUCAAGCGAAAAACUUAUUGGAAGGAC	UUAGUUCAGUCCUUCACAGG	((((....((........)).....))))...........	-2.5	0
SP_1654	1554766	1557177	-	1554728	205	9.31818	38	AAGAAGAUGUUAUAAGGCAGUAAUUUGAAACUGCCUUUUA	AUAAGGAUUUAAGAAUAUAA	.............((((((((........))))))))...	-11.1	4
SP_1655	1557230	1557922	-	1557193	47942	212.398	37	UAAAAAAUUGUAAGUCUAGAAUUGAUUUCUAGGCUUUUUA	UGUUAGUAUGGAAGUAUGAU	...........((((((((((.....))))))))))....	-11.3	5
SP_1659	1559245	1562037	-	1559136	14240	301.895	109	UUGUAUCACGUUUUUGAAUACCUGAUAUGAUGCGUUUUUU	AUUUAUUUUAAAAAUUUGCG	((((((((.((........)).))))))))..........	-5.8	6
T-box	1562083	1562289	-	1562067	54150	765.758	16	GGUACCACGAUUUUCGUCCUUUUUGGAAGUCGUGGUUUUU	AAUUUGUUAUUAUUUAUAAA	...(((((((((((((.......)))))))))))))....	-16.7	6
SP_1660	1562181	1562342	-	1562067	54150	806.022	114	GGUACCACGAUUUUCGUCCUUUUUGGAAGUCGUGGUUUUU	AAUUUGUUAUUAUUUAUAAA	...(((((((((((((.......)))))))))))))....	-16.7	6
SP_1661	1562385	1563185	-	1562297	1293	18.1651	88	CAAUACCGGGAUUUGAAGCACCGCAAGAAUCUGUUACAAU	UUUAUAAGAAAUAUUCUGAG	........((((((...((...))..))))))........	-3.9	3
SP_1662	1563182	1564033	-	1563172	457	8.83809	10	AUAACCGUCCAGUUAUUAUUAAGUAAGUGAGGAAUAGAAU	GCCAAUUACAUCAUUAGAAA	....((...((.(((((....))))).)).))........	-4	2
SP_1663	1563964	1564227	-	1563962	696	14.699	2	GAGAAAACCUAGUGCGUUUUCUGGCGAUGAUAGGAUGAAU	AAAGGGAUUUAUCAGCAUUU	.......((((...((((....))))....))))......	-6.9	2
SP_1664	1564227	1564766	-	1564198	360	6.36672	29	GAGUACGAUAAUGAUUUUUUUAAUUCGUAUGAUUUAUAAU	GCAGUGGAUAUUUACUCCCU	..((((((....((....))....))))))..........	-4.1	5
SP_1665	1564776	1565447	-	1564767	427	9.81524	9	UGUUCGUAUAGGUACAUCAUUUUUUAAGUAGGAGAGAACC	AUGUCUUUAAAAGAUAGAUU	.((((.......(((............))).....)))).	-2	0
SP_1666	1565452	1566711	-	1565302	745	13.7224	150	AUGUAGAUGUACCGACAGCGGAAGCCUUGCUUCCGCUAGG	UGUCCAUCAUAUCGGUGAAA	...........((...(((((((((...))))))))).))	-15.4	1
SP_1667	1566728	1568101	-	1566710	372	7.04065	18	CGGAAGCAUGUUUGACGAAUAAAGAGGAAAAAUAAAUUAU	GACAUUUUCAUUUGAUACAG	........................................	0	4
SP_1668	1568320	1569024	-	1568302	4652	158.231	18	AAUGAUUGCAAAGGAAGCUUAACACAGAGCUUUCUUUUUU	GCUCUUAGAGAGUUUUUACA	.........(((((((((((......)))))))))))...	-11.7	7
SP_1671	1571170	1572213	-	1571098	5291	143.524	72	CUGCACGGUGACUAGAGUUCUCGGACUUCAGCCCUUUUUA	AAGGAGUAGAAAUGAAAUUA	......((.(.((.(((((....))))).)))))......	-5.5	5
SP_1672	1572389	1572985	-	1572311	7996	260.804	78	AUCAAAGAGGCUGAAAAUCGUUCCUAUCGGCCUCUUUUUG	UAUAGUGUGAUGAGUAGGCU	...(((((((((((............)))))))))))...	-14.7	6
SP_1673	1572996	1575053	-	1572867	112	5.66777	129	GUCUGGCCUUUUAUACGAUUGGGAUGUCUGCUGAUGAUGU	CAAUGAAUUUGCAAAAAAUC	((..(((.(((((......))))).))).)).........	-3.4	3
SP_1674	1575253	1576104	+	1576129	2185	23.6301	25	UGUAAGAAAAUCCUAGUUUGGCUGAGCCAAACUAGGAUUG	UUUUGUCUUAAAAUGAUAAU	........((((((((((((((...)))))))))))))).	-21.2	3
SP_1675	1576120	1577004	-	1576093	1205	20.7759	27	AAAACAAUCCUAGUUUGGCUCAGCCAAACUAGGAUUUUCU	UACACGUUUUUGUCUACGAU	.....((((((((((((((...))))))))))))))....	-20.7	5
SP_1676	1577022	1577939	-	1577003	26	2	19	ACCAAGGAGCGCUUCCUCUAAUCUAAAAGGAGGUAUUUAU	GACAUAUUACGUUGCAAUUG	......(((.(((((((..........))))))).)))..	-7.3	5
SP_1680	1579470	1579922	-	1579434	398	31.2157	36	UUAAAAAUAGGAUGAAUUGUUUUUUUGUAAAGCUUUGAUA	AUACUCUACCAUGAAAUUGA	..((((((((......))))))))................	-2.2	4
SP_1682	1581049	1581945	-	1581032	62	4.27586	17	UUGGAAACGACGUAGAAUACUAAAGAAAGGAGACAGCUAU	GCAAUCUACAGAAAAAAAAC	........................................	0	2
SP_1683	1582167	1583495	-	1582071	725	38.326	96	UUUUCCCUCUACACAGAUAGUGUAAGAAAAGGGGGCUUUU	GUUUAAAAUGUAAGAAACUG	....((((((((((.....))))......)))))).....	-9.7	4
SP_1684	1583620	1585152	-	1583575	31	2	45	UACUGACUUAAUAAAAAACAGAGGAGAGUGAUGGAUGAGU	AGGAUGAAAUGAAAUCGCAU	((((..(((............)))..))))..........	-1.5	2
SP_1685	1585156	1585854	-	1585136	14	14	20	UCGUUGCUAGUCUUAAAUAAGAUGUGAGGGGGAGUUUUAU	GUUUAAAGUUUUACAAAAAG	((.((((..(((((....))))))))).))..........	-4.9	5
SP_1686	1586028	1587131	-	1585959	109	9.47826	69	CUUGCUCCUCUGAAAGUACUUUUAGAGGAGCUGUUUGACU	UUGCUAGUUUUUGAAACUGA	...((((((((((((....)))))))))))).........	-18	4
SP_RS08365	1595296	1598227	-	1595190	2450	79.8913	106	GCUAAGCUCGAGAAAGGACAAAUUUUGUCCUUUCUUUUUU	GAUAUUCAGAGCGAUAAAAA	.........((((((((((((...))))))))))))....	-14.8	7
SP_1695	1599458	1600438	-	1599373	1101	70.1274	85	AGUAUCAGGGGAUUAAGAAAACUUUAUACUAUGCGUUUUA	UCAUGGAAAUAUAGUAAAAU	(((((.((((...........)))))))))..........	-3.5	4
SP_1696	1600611	1600718	-	1600574	9564	193.447	37	UAGUAUAAACAGAAGAGAGAGCGAAAUGCUCUUUUUUCGU	UUCUAAAACUACUUUCAGCC	...........(((((((((((.....)))))))))))..	-14.3	6
SP_RS08385	1600733	1600925	-	1600684	334	14.5341	49	UAGGUUUGGCUCUUAUACUAGAGUCAUCAAAAAGAAACGA	GGACUCUCAUAUGACAGUAA	......(((((((......)))))))..............	-8.5	0
SP_1697	1600953	1602968	-	1600922	66	3.11851	31	CUGGAUUAAGCUUUCUCUAAGGAAAACUUAUACUCAAUGA	AAAUCAAAGAGCAAACUAGG	..((..((((.(((((....))))).))))..))......	-4.5	2
SP_1698	1602987	1604090	-	1602967	65	3.40116	20	UUCCGAGAGAAUAUUAUUAGAAAAGAAAGGAGUGGAGCAU	GAAUCUACAUCAACCCUUGC	((((........................))))........	-1.3	2
SP_1699	1604080	1604448	-	1604051	33	2.30447	29	AUGAAAGCUAGUCCACAUAGACCAACCAAGGCUCUGAUUC	AUCUGGGAGCUAUUCGACAA	.................((((((......)).))))....	-3.1	4
SP_1700	1604487	1605518	-	1604449	12405	177.722	38	AAGUGAAAAGGAUGGAGUUGGGGAAUCUCAACUCCUUUUG	AUGAGAAUGAUAGUUGGACA	........((((.(((((((((....))))))))))))).	-13.8	5
SP_1701	1605520	1606551	-	1605428	143	6.44486	92	GAAACCCAAUUGUCUGCGGAAGCCUUGAGACUCAAGGAAA	GCCGUGACAGGGAAUUGGCA	....((((......)).))...((((((...))))))...	-7.3	0
SP_1702	1606632	1609145	-	1606568	3640	63.2873	64	UCUUGUGAAAAGUAAAUUUUUACUGGGUAUCCGUUUGCUU	UAUAAGGAGAUGAGUUAUGG	.((.(((((((.....))))))).))(((......)))..	-5.5	5
SP_1703	1609291	1609518	-	1609243	835	75.9091	48	AAAAGUCGGAGAGGUUAGCUUGAAAACUAACCUCUUUUUC	CUUUUCAAAAUGGGGAUUCU	.......(((((((((((........)))))))))))...	-13.9	6
SP_1706	1610876	1611667	-	1610764	21	2.1	112	AAACCAUCUAUUGUCAACAGCGGUUCAAAAGCAGGAUGCU	GUUAUCUUUUUCAAGAGAGA	....((((((((((.....))))).........)))))..	-2.9	2
SP_1707	1611852	1612190	-	1611758	33	2.2	94	AUGUAACUGACUUCGUCAGUCUUAUCUACAACCUCAAAGC	AGUGCUUUGAGCAACUUGCG	.((((((((((...))))))......))))..........	-6.1	1
SP_1708	1612327	1612671	-	1612238	106	7.36111	89	CAUUUAUUACACGCUAUUCCAAGGUUUAUAUUGGUAAUAA	CAUUUAAUAGAACGAAACUA	..............((((((((........)))).)))).	-4.4	2
SP_1709	1612751	1614061	-	1612715	14742	339.221	36	AUAAAAAAGUAGAAUCUGGAAUGACAGUUCCGGAUUUUUU	UGAUAUAAUAAAAUAAUAGA	..........((((((((((((....))))))))))))..	-13.1	6
SP_1710	1614075	1614788	-	1614060	103	5.43964	15	UCUUGAACAGAAGAAAUUAUUGUAGAAAGUGAGAAAUUAU	GGCCCUACCAACUAUUGCCA	((((......))))..(((((......)))))........	-2.5	3
SP_1711	1614785	1615681	-	1614671	77	5.07598	114	UUAAAUGAGAUUUUGACAGCAGCCCAGAUGGCAUCAUCUU	GGAAGAAUUUCCAAUCCUAC	.........................(((((....))))).	-3.7	4
SP_1712	1615682	1616851	-	1615680	1643	62.1956	2	AAGAACUAUUAGCUCGAUUAGAAAAAGGAGGAGAUUAGAU	GGAAAGUGUCGGAGACGUAC	.....(((((..(((............)))..)).)))..	-3.2	3
SP_1713	1616852	1617325	-	1616735	215	7.4596	117	CCUCCCGAUUAUCGGUCAGGAGGCACUGAGCCUUUAUCUU	UAUACAAUCAGUUUUUGGGA	(((.((((...))))..)))((((.....)))).......	-10.5	6
SP_1714	1617465	1617830	+	1617836	561	5.92387	6	CAGGCGUAGUCAGUGAUUAUAUUAAAGGAGUUUAAGCCUA	UGUCAUUACUAGUAUUUGAA	.((((((((((...)))))).(((((....))))))))).	-5.7	2
SP_RS08480	1617835	1618515	+	1618547	534	12.0299	32	UUCCGUCAGAAUUUAAGGCCUAAGCAAAGGAGAUUAUUUA	UGUUUUGGAAUUUAGUUCGC	..................(((......)))..........	-1.8	5
SP_RS08485	1618546	1619313	+	1619441	295	9.95277	128	GUGUUGAAUAUGUACUGCCCCCCAAAAGUUAGAUUUUUUC	UGUCUAACUUUUGGGGGCAG	........................................	0	6
SP_1716	1619725	1620924	-	1619698	1305	46.6071	27	AUCUUAUAAAUAGAAGAGCCUUGCGAAAGCGAGGUUUUUA	AAGGUGAAAAGGGUGGAAUC	.............(((((((((((....))))))))))).	-14.7	5
SP_RS08500	1621937	1622128	+	1622151	10	10	23	AUUUUCGAAGAGUAUUAGUGAUAAAUCCAUUAUACAGCAG	CAAACUUAAUUUAUACCUUC	...........((((.((((.......)))))))).....	-3.2	1
SP_1720	1623130	1623747	+	1623790	1369	37	43	CGUAAAAAAUCCGUUUGGUUUCCCAAGUGGAUUUUUAAAG	CGUAGAUUAACUAUAGCUUG	....((((((((((((((....))))))))))))))....	-13.3	4
SSRC8_2	1623758	1624060	+	1624065	1519	89.3529	5	CAACCACAAAAUCCGUUUGGUUUCCCAAGCGGAUUUUGUG	CUUUAUUUUGAAACUUCUUU	....((((((((((((((((....))))))))))))))))	-23.4	5
SP_1721	1624067	1624954	-	1624031	139	6.13235	36	AUAAAGCACAAAAUCCGCUUGGGAAACCAAACGGAUUUUG	UGGUUGAAAACAAUAUUUUU	........(((((((((.((((....)))).)))))))))	-16.5	4
SP_1722	1625103	1626986	-	1625050	426	19.1461	53	AUGUGAAAACGAACAAAUGACAUGUUUGUUCGUUUUUAUU	AGAUAGUAAGAUUUACAGAG	..((((((((((((((((.....)))))))))))))))).	-16.4	7
SP_1725	1628797	1629762	+	1629799	169	13	37	UUAAACACAAGAAAACUCAGACCGAUUCGUCUGAGUUUUU	AUGAUCUUAAAUUUUCGAGA	..........((((((((((((......))))))))))))	-15	5
SP_1726	1629797	1631071	-	1629766	3091	38.8317	31	AGAUCAUAAAAACUCAGACGAAUCGGUCUGAGUUUUCUUG	UGUUUAAAUACUUUUUCCUG	....((..(((((((((((......)))))))))))..))	-16.2	6
SP_1727	1631071	1632267	-	1630991	1031	39.8994	80	AGAGCGCCUCGAGCUGUUAAAAGCUCAGGCGCUCCUUAGU	CCUGAGAGACAAGCUAGUCU	.((((((((.(((((......)))))))))))))......	-24.5	4
SP_1728	1632374	1632661	-	1632314	2770	76.4389	60	CAAUAAGAGGCUUGAUUUGGUGAAUCAAGUCUUUUUUCUC	UCUUUUACUGCCAUUUGUGA	....((((((((((((((...)))))))))))))).....	-13.8	6
SP_1729	1632690	1633313	-	1632667	26	2.02395	23	AUGAACUAGGAUUCUAGUUUUGCAGGAAGUCUACUACUUU	CCUUAUUGUCUGUAAAUCUA	..(((((((....))))))).....(((((.....)))))	-6.5	4
SP_1730	1633375	1633824	-	1633285	52	3.09189	90	AACGCUUUCUAUAUGUGCGAGAAUACCGCACUUAUGAAGA	AAUUGCGGCUGAUUUUGGUA	.....((((.(((.(((((.......))))).))))))).	-9.9	2
SP_1731	1633826	1634584	-	1633696	33	2.21973	130	GCUCUUACCUGGAGGGAUUUUGGGCAUGACUGUCUGGCUA	AUCUAUCUCUUGCUCAAGGA	.((((.....)))).....(((((((....)))))))...	-6.5	3
SP_1732	1634699	1636678	-	1634636	19944	302.745	63	GUAAUCAAUCUUUGUCAUGAUUUCAUGGCAAAGAUUUUUU	UUGAGUCCGGAUUUGUGAUA	......(((((((((((((....)))))))))))))....	-15.7	6
SP_1733	1636675	1637415	-	1636649	72	3.88991	26	AGGAUGCAGAAUGAUCCAAAUCGGCAAGAUUUUUGCCGGA	CGCUAUCGGAUUGUCAAACA	.((((........))))....((((((.....))))))..	-12.7	2
SP_1734	1637430	1638746	-	1637345	1726	41.2342	85	AGAAACGAACAAAUAACCAAGACUAUGUCAACCACUAUGU	CAAUAGAGCUGGACGUACCA	....................(((...)))...........	-0.7	3
SP_1735	1638736	1639671	-	1638685	57	4.07143	51	CUAGAAGUUUAGCUCUAGCAGUGCUAGAGGAUGUUUUUGU	GAACCAAGCAUAUUCAAAUA	.((((((.....(((((((...)))))))....)))))).	-10	6
SP_1736	1639684	1642080	-	1639670	104	6.09375	14	ACCAUGAGCCGCAGCAAUUUUUAUAAGAAGGAGAAGAUAU	GACAAAACUAAUCUUUAUGG	.......((....)).........................	-0.3	2
SP_1737	1642146	1642460	-	1642118	15137	89.7488	28	GAAAAAAUUUAAGGUUGGGGGGACUCAAUCUUAUUUUUUC	UAUUGCAAGAAUGUACUGAC	(((((((..((((((((((....)))))))))))))))))	-13.8	6
SP_1738	1642485	1643111	-	1642456	60	2.89494	29	CUACCCGAUAAAAUUUAGAAAAUAGGUACAAGCAAAUGAU	GUUAAAACCCUCUAUUGAUA	.((((...................))))............	-0.8	2
SP_1739	1643241	1644854	-	1643205	29344	284.681	36	AUAAAUAAGAAAGAGCAGUUGAAAAAUUACUGCUUUUUUG	UUACACUAGAUAGAAAGACU	........(((((((((((.........))))))))))).	-11.4	6
SP_1740	1645045	1645299	-	1645021	572	19.3898	24	UAAAGAUCAUUACUAAGUCUAUUGAAAGGUAGGCUUUUUC	UCAAGUCUCUACUAAACUAC	..............(((((((((....)))))))))....	-7.6	5
SP_1741	1645303	1645596	-	1645261	47	3.13333	42	AAUGCUGCUCAAGUUUACAGAAGAUGCCUGGGCAGAUUAU	UGCUACUGGCAAAAUCAGGA	....(((((((.((...........)).))))))).....	-10.2	3
SP_1742	1645795	1646892	-	1645771	11292	192.843	24	AAUAGAAACAAACUAAGUCUACCGAAAGGUAGGCUUUUUG	AGAUUUUUUACGAAUAAUAC	........((((..(((((((((....)))))))))))))	-13.2	5
SP_1744	1647751	1648104	-	1647717	5199	74.7842	34	GCUUAGAAGAUGAACUCAGUUGUAGUCAACUGGGUUUCUU	UGCUUAUUUUAGAAAAAUUG	......((((..((((((((((....))))))))))))))	-13.6	5
SP_1745	1648117	1648617	-	1647999	35	2.05128	118	CUCGCACUUGAUGUACAAGAUUUGACUAGUGUGACGGACU	ACUUGGUCAUCACUAGCUCA	.(((((((...................)))))))......	-6.6	1
SP_1746	1648618	1649211	-	1648603	71	3.15473	15	UGUGCACUAUUUGAAAGAGGACUAAAUGAAGACGGCUUUU	AUAAUCAUUGAUGUUCAGAA	............(((((..(.((......)).)..)))))	-1.6	4
SP_1747	1649211	1649840	-	1649191	53	2.63613	20	AGAAGGAAGGGCUCUACUGAUGUCCUAUCAAGACUAUAUC	AACUGCUCCCGUGAGGCCUU	....((.(((((((....)).))))).))...........	-7.7	3
SP_1748	1649892	1650203	-	1649774	107	5.17971	118	ACCAAGGUAGAGUUGGAGCCAGAAAUCAAGGAGAAAAAAC	GCAAACAAGUUGGGAUUUUA	.((((.......))))........................	-2.5	0
SP_1749	1650417	1651523	-	1650270	49	3.00383	147	AUUGUGAGGUCAGGAAAUCCAUUUUUCAAAGAUGAAAUCU	UUGGAAAAUUAGUUCCGACC	....(((((...((....))...)))))............	-3	3
SP_1750	1651526	1652116	-	1651497	50	2.90323	29	AAGGAAUUUAACUAUGGAAGAAAUUCUCUGUAUUGGUUGU	GGAGCAACCAUUCAGACGAC	........((((((....(((.....)))....)))))).	-4.5	5
SP_1751	1652068	1652976	-	1652024	95	5.2988	44	AGGAGCCAGAAUGGCGAUUGAAAAUUAUAUACCAGAUUUU	GCUGUGGAAGCAGUCUAUGA	....((((...)))).........................	-4.3	4
SP_1752	1653033	1653638	-	1653021	188	8.53294	12	UGUUAGCAAUUUCUCACGCACAGACUAGACCUGUUAUUUU	AAGUAAUUUGUGGUACAAUA	...................((((.......))))......	-2	6
SP_RS12360	1653797	1653985	+	1654110	80	4.48463	125	AAAUUGCACCACCAGAUGGGAUUGGGCAGGUUCUCAGCAA	CCUCUUGCUCAAACUGGUUG	...((((.(((((.....))..)))))))...........	-6.8	1
SP_RS08675	1653982	1654941	+	1654978	837	40.176	37	AUAACUCAUCAAGGCAAGCCUGCUCAUGUCUUGUCUUUUA	CGCUUUUAUUCUAACUUAUU	..........((((((((.(.......).))))))))...	-7.8	5
SP_1754	1655009	1655962	+	1655978	437	15.5516	16	UUUUUACCAAAAAUAUAGACAGUAAUACUCUUCAAACCAC	GUCAGCGUCGCCUUGCUGUA	........................................	0	0
SP_1755	1656378	1656602	-	1656327	145	145	51	AGAUAUUCACCUUUUGUGGAUUGGUCUGAAGUUUUCUUUU	UUAUACUCAAUGAAAAUCAA	((((((((((.....))))))..))))((((....)))).	-5.9	7
SP_RS12365	1676005	1676085	-	1675865	91	2.88235	140	GUUAGACAGAAAAAAUCUAACUUUUUGGGGUCAGUACAAU	AUUAGGGUGUGAUUAAUUAU	((((((.........))))))...................	-3.8	2
SP_1774	1693796	1694176	+	1694184	193	8.759	8	AGCUUGGAAGCAGGUUUGGAUUUCUUGAUUUAAGAUGAUU	UUAAAAAAAGUUGCGUGCGC	.(((((....)))))(((((((....))))))).......	-6	3
SP_RS08800	1694275	1694496	+	1694625	756	10.5835	129	GCAACUUGGUGUGGUCCAUGUCGUAUGCAAGGUCCAAUCU	UGGACAAAUUGUCUGAAGAA	.......(((.(((.((.(((.....))).)).)))))).	-8.2	3
SP_1776	1694513	1694827	+	1694866	27160	203.798	39	AAUCAAACGAGAGACCAAGUACUUUCUUUGGUCUCUUUUU	UCUUGCCCUUUGCCAUUUUU	........(((((((((((.......)))))))))))...	-13.8	6
SP_1777	1695201	1695665	+	1695690	66	3.73585	25	AAUUGACAACCGCUAAAGUCAUACUCAAUGAAAAUCAAAG	AGCAAACUAGGAAGUUAGCC	...((((..........))))...................	-2	1
SP_RS08815	1695677	1696164	+	1696182	1341	82.5231	18	AAAAGCCCUGUUCCUCAAGAUGAGGAGCAAGGCUUUUUGA	GUUUCAAUUAUUCUUCUGUU	(((((((.(((((((((...))))))))).)))))))...	-21.5	5
F55	1696066	1696162	+	1696182	1341	82.5231	20	AAAAGCCCUGUUCCUCAAGAUGAGGAGCAAGGCUUUUUGA	GUUUCAAUUAUUCUUCUGUU	(((((((.(((((((((...))))))))).)))))))...	-21.5	5
SP_1778	1696189	1696857	-	1696139	11004	108.437	50	AAAAGCCUUGCUCCUCAUCUUGAGGAACAGGGCUUUUUCG	UAUGAUACUCUUCGAAAAUC	((((((((((.((((((...)))))).))))))))))...	-21.1	5
SP_1779	1696968	1697522	-	1696888	53	3.27316	80	UCAAUUUUCUUGAAACCCUUUCCUACUUUUGAUAGACUAG	UAUCUAGUUUUUGAAAAAAG	((((.....))))...........................	-0.3	2
SP_1780	1697768	1699564	-	1697702	206	6.45431	66	UGUUUAUGGGCUUGUUAAGCGUCAUUCUAUUUGUCUUAGU	UGUAGCUAUUUUCAAAAAUG	.....((((((((...)))).))))...............	-3.5	4
SP_1781	1699575	1700318	-	1699480	51	3.30717	95	GACUUAACAGCCCUAUACCAAGACCGUGAGGAUUUCUUGC	GUGCAAUCGAGAAAGCUCGC	..................(((((((....))...))))).	-4.5	5
SP_1782	1700320	1701270	-	1700261	160	4.82599	59	AAAGGCAGUGCUAUCUCUCCUGUCACUAUCGAGGACAAGG	AAACCAGUAAGCAUAUGUUU	...(((...)))......((((((.((....))))).)))	-5.5	0
SP_1783	1701406	1701834	-	1701347	311	11.7019	59	UUUCUAAACUGAACCCGCCCUAAACACUGUGCCAAAAAGA	UAAACUUCUCUUAGACACAA	.(((......)))...((.(........).))........	-0.7	0
SP_1784	1701815	1702918	-	1701675	226	10.5361	140	CCAGGUGGUGGCCGUGAAGGGGACGAAAGCCCUUUUGAAU	GCGCUCGGCGUGAAGUUUAU	...(((....)))..(((((((.(....))))))))....	-10.8	5
SP_1785	1702922	1703392	-	1702841	153	8.89535	81	GGUUUAUGUGCUAGCUGUUGUCUUUAUUAUGCUAGCUUUU	GCUUGUGGAACAAUCGCAUU	.........((((((...............))))))....	-8.7	5
SP_1786	1703683	1704135	-	1703577	2675	123.963	106	AUUGAUUUUAUAGAUUUAUUAGCCCUUUCGAGGGCUUUUU	AUAUUGAUUUUUAUGAGAAA	....................((((((....))))))....	-8.8	5
SP_1787	1704172	1704378	-	1704152	1339	54.8477	20	GAAAGCAAGCUGGGUUGUAAAAUUCAGUCCCUGCUUUUUG	AUAUGGAGGUAGUGAAAUGU	(((((((.((((((((....))))))))...)))))))..	-13.5	5
SP_RS08875	1704488	1704661	-	1704434	45	45	54	AUAAAUUGGCUUCCCUUAGAACCACAUCUAGGGGCUUUUA	UGUAUAAUAGAAUAAUAAGU	............((((((((......))))))))......	-10.5	4
SP_1789	1704832	1705047	-	1704747	12	12	85	UGUUGAAAAUCCUGAUUUCGAAGACUUGAGAGUUAAUCAU	ACUCAAUGAAAAUCAAAGAG	...............((((((....)))))).........	-2.2	4
SP_1790	1705345	1706616	+	1706616	262	12.9337	0	CUCAAAGAAAGGAAGCUAUCGACCGUUUGCGAAAAAUCUG	AAAUCCUUUUCAAAAAAUUG	..........(.((((........)))).)..........	-2.7	2
6S	1706683	1706876	+	1706879	3874	62.0182	3	UACAAACCGUGAAGUUUCGGCACCAAUACAGCUUUUUUCU	UUGCCUCCUUAGCUCAGCUG	......(((........)))....................	-2.9	7
SP_2252	1706881	1706953	+	1706998	1074	22.9052	45	AAUACAACAGGAAAAGCCUUAUAAUAUAGGGCUUUUUUUG	CUUUCCUUUUAAAAAUUGUC	.......(((((((((((((((...)))))))))))))))	-15.7	7
SP_1791	1707036	1707152	-	1706963	12	12	73	GAAAGCAAAAAAAGCCCUAUAUUAUAAGGCUUUUCCUGUU	GUAUUUAUAUGCCCCCUACA	...((((..(((((((.(((...))).)))))))..))))	-9.6	5
SP_1793	1708735	1709310	-	1708614	184	10.433	121	UAGCUUCUUAGUUUGCUUUUUGAUUUUCAUUGAGUAUUAC	UCUUAUGGUAGUUAUUUAUG	.((((....))))(((((..(((...)))..)))))....	-4.6	3
SP_1794	1709561	1709974	-	1709533	422	9.27734	28	GAAAAGUGUUAAUCAAGUAUUGACACUUUAUCUGGAUUUC	GGUAUAAUAUGCUUAGAAAG	(((((((((((((.....))))))))))).))........	-9.7	4
SP_1795	1710372	1711691	-	1710308	20	20	64	AAAAGUUCUCUUUCUAAAAUAGUGGAAAGAGGACUUUUUG	UGUUUUGGGUAUAUAAGCUU	((((((((((((((((......))))))))))))))))..	-18.2	5
SP_1799	1715315	1716316	-	1715202	2997	38.6559	113	AAAAAAGAAAUAAAGAGACAGCGCCAAGCGCUAUCUUUUC	UAGAAAAAAAUGAAACGUUU	............((((((.(((((...))))).)))))).	-11.5	5
SP_1800	1716678	1718159	-	1716594	435	40.4651	84	CAAAAGUUAGACAGAAAAAGUCUAAUUUUGGGGGUGUUUU	UGUUAAGAAAAGACCUUCAA	..((((((((((.......))))))))))...........	-8.8	5
SP_RS08940	1718602	1718766	+	1718836	455	7.13747	70	UUUUAAAUCAAUGACGGGAAAAAUAGUUUAAAUGUUAAAU	CGAAAGGAUUGUAUAUGUCA	.(((((......(((..........)))......))))).	-0.9	4
SP_1802	1718850	1719416	+	1719486	856	14.2549	70	UAUCGAUAUCCAAUUAUCGCUGGUCUCAUAGGCGUAUUUC	UGGCUUGUUUGAUUGUCUCC	...(((((......)))))...((((...)))).......	-5.3	4
SP_1803	1719428	1719598	+	1719638	1236	19.0027	40	AAAAAAUAAAAAUUACUAAUUUAAUUAAAGGAGUUUCAUA	UGUCAAACGAAAAAAACACA	..............(((..(((....)))..)))......	-0.2	4
SP_1804	1719637	1720245	+	1720317	707	5.84988	72	UGUCAGUAGAAGAAAAAUUAAAUCAAGCUAAAGGUUCUAU	UAAAGAAGGUGUUGGGAAAG	.....((((((.......................))))))	-1.6	4
SP_1805	1720276	1720479	+	1720593	11435	54.1328	114	AAAGCUAGAGAUUCCCAAUUGCGGAACUCUAGCUUUUUAA	UUUUGCCUCUUUCUCUUAUU	((((((((((.(((((....).))))))))))))))....	-17.3	5
SP_1806	1720589	1720828	-	1720551	146	7.48718	38	AAAAAGCUAGAGUUCCGCAAUUGGGAAUCUCUAGCUUUUU	GUUUUCUGAGAAUCAUCUUG	((((((((((((((((.......)))).))))))))))))	-20	5
SP_1809	1722233	1723384	-	1722098	1196	53.3248	135	GUAAGAGGAAAGGCACGAAAGGAAGUCUUUCCUUUUUCUU	UUGCAGGAGAAAGGCCAGGA	..((((((((((((..........))))))))))))....	-13.5	7
SP_RS12390	1724341	1724460	+	1724501	49	49	41	UAAAAUCCUGAAUCGGCUCUCCUUGGUGGAGAGCUUUUAC	UAUUUUCGAACCGACGAUAA	..............((((((((.....)))))))).....	-14.3	4
SP_1811	1724432	1725208	-	1724377	1189	62.0348	55	GUAAGAGGAAAGGCACGAAAGGAAGUCUUUCCUUUUUCUU	UUGCAGGAGAAAGGUCAGUU	..((((((((((((..........))))))))))))....	-13.5	7
SP_1813	1726402	1727031	-	1726357	11	11	45	GAUUUUACGGAAAAUUCGGCGGACGUUUUGUCCCAGAAAC	AUUGAUGACAGCAGUUUUGG	..............(((.(.((((.....))))).)))..	-6.3	0
SP_1814	1726988	1727755	-	1726839	10	10	149	GCAGCUGAGUUGGCAAAGCUUAUUCCUGCAGAUGUGAAAA	AGGUUGGAGUAUUUGUUUCA	((((.((((((.....))))))...))))...........	-9.6	2
SP_1815	1727752	1728756	-	1727660	64	3.65714	92	GAUGAAGCUGGAGCAAAUCCAGCCUCUGCGCCAGACCUAU	CGCUUGGCAGAAUUUUUGAA	...((.((((((.....)))))).))..............	-11.2	2
T-box	1730763	1730994	-	1730738	5326	65.5771	25	AAUUUCGUCCUCACGCAAGUUAUUUUGCGUGGGGAUUUUU	CAUACAGUCACCACGGACUA	......(((((((((((((....)))))))))))))....	-19.9	5
R12	1731041	1731440	-	1731039	259	8.87539	2	AGGUGUACCGAGAUGAACAUCUCUUCAUCAAUGUCUCUGG	UCGUGGAGGCAAGGACCUAG	.((((....(((((....)))))..))))...........	-6.6	3
trn0830	1731046	1731098	+	1731222	53	3.95522	124	AGCUGACUUCGUCAGUUCUAUCCACAACCUCAAAACAGUG	UUUUGAGCUGACUUCGUCAG	.((((((...))))))........................	-6.1	1
SP_RS09030	1731063	1731359	-	1731039	259	12.1366	24	AGGUGUACCGAGAUGAACAUCUCUUCAUCAAUGUCUCUGG	UCGUGGAGGCAAGGACCUAG	.((((....(((((....)))))..))))...........	-6.6	3
T-box	1731526	1731755	-	1731496	6637	110.259	30	CGCCCUCACACGGAAGUAUAUUCUGUGUGUGGGCUUUUUU	CUAUCCGUCGUUUGGUUUAU	.((((.(((((((((.....))))))))).))))......	-22.4	6
SP_1821	1731967	1732968	-	1731861	45	2.47544	106	UCCAUUCAGUUUCUAUUGAGUUGGAUCCAAUUUCUAAGAA	GUGGGACAUGUUCAUGUUCG	((((((((((....)))))).))))...............	-7.9	2
SP_1823	1733540	1734250	-	1733497	285	16.2857	43	UUAGUAAACAAAGGGACAGAUGUUUUUGUCCUUUUGCUUU	UUAGAUGUUUUAAUCAUCUA	........((((((((((((....))))))))))))....	-15.2	6
SP_1826	1737069	1738136	-	1736992	30	2.6087	77	UAUUUCUAAAUUUAUGGAAGAAAUAAAGAGAGGCUUUUGG	UUUAGUAAUAGAGGGAGUUA	(((((((...........)))))))(((((...)))))..	-3	4
SP_1830	1741511	1742152	-	1741402	36	36	109	GAAAUUGACAAAAUAUAUGUGAAAAAUAGAGUACUAGCGU	UAAUAGGUGAGGAGGGAAUU	....((.(((.......))).)).................	-0.5	2
SP_1833	1743033	1745192	-	1743008	10	10	25	GGUAAAGAUAAAUAAAAUUUGUUCGAUACAAGGAAGUUCC	GUAGAAAAUGAGGAUAUUGU	.(((..((..((......))..))..)))...........	-2.4	2
SP_1837	1746322	1747575	-	1746294	65	4.22646	28	UCAAAAAAAUGACAAACUACAGUCAAGCGAAAGUGAUCCU	GCCCCUAAAAAGUCUAAUUG	.........((((........))))...............	-3	3
SP_1838	1747591	1748283	-	1747547	107	4.67448	44	GUCAUAAGAAAAUGAGUACAGAUAAAAGGAGCAAAUCAAU	GCCAAAUUACAAUAUUCCAU	.((((......)))).........................	-1	2
SP_1839	1748456	1750207	-	1748333	52	3.72537	123	AAAUUACAGAUUUCUUUCACCGCCUUUUCCAUUUUGUGGU	AUAAUGAAAAAUGUUGACAA	..................(((((............)))))	-3.3	5
SP_1840	1750197	1751942	-	1750145	37	2.2	52	GACUGUAUUGAAGCGCUUGAUGUCUUAUCUCAAGCCUUAU	GGACUCCUGACCUUUUUGGC	..........(((.((((((.(......))))))))))..	-8.5	3
SP_1841	1752148	1752525	-	1752111	72	3.6129	37	UAAGAAAAACCUGGGGUCUUGUACUCUUCGAAAAUCUCUU	CAAACCGCGUCAACGUCGCC	..(((.......(((((.....))))).......)))...	-3.2	4
SP_RS09140	1752597	1752866	-	1752522	133	9.09402	75	UUGACUCUCAAAUAGCUCAACAACAAUGUUCACUUUGUGA	AACGUUUGAUUGAUGGUAAG	......................((((........))))..	-1.5	4
SP_1844	1752826	1753053	-	1752690	51	3.25532	136	AGAUGGCGCACUUAUCAAGGUGGGAGAUCGCUAUUAUCGU	GCCCUAAAUGGAAGUGAGCC	.((((((((((((....)))))......))))))).....	-9.3	4
SP_1845	1753187	1754014	+	1754037	138	8.33208	23	UUGGAAAUUGACUUGUAAGGAUUUUCUAUAUGGACUACAA	UGCGGUCAUUCCCGAGUUGC	..(((((((..........)))))))..............	-2.8	1
SP_RS09155	1754026	1754169	+	1754254	30	2.26415	85	CCCUUUGGUCGUGGAGUCAAUCUCUCCUUUGGCAUAAAGG	AUGUUUCAAAACUCUAUUAA	.((((((((((.((((.......))))..)))).))))))	-13.4	1
SP_RS09160	1754280	1754408	+	1754491	1829	89.9508	83	AUAUUGUCAGGUGUCUAAAAGCUUGAUAGUAUGCCUUUUA	UGAUGGAAAAAUCUUCUAAU	((((((((((((........))))))))))))........	-12.1	4
Purine	1754791	1754886	+	1754947	131	9.35714	61	CUAUUUAGGGGACUUACUUAGAGAUUAAGUAGGUCUUUUU	UUAAUAUUUCCCUUAAUUAG	......((((((((((((((.....)))))))))))))).	-13.6	6
SP_1847	1755277	1755858	+	1756001	41	3.13529	143	CCCUUGGCUAUUCAGCUGAGCAGUUGACCUACCUGAUUUC	UACAGAUAUCUUCAUGUGUG	..(((((((....)))))))(((.........))).....	-6.2	4
SP_1848	1755858	1757120	+	1757147	1375	27.3179	27	AUAAAAAGAAAUAAGAAAAAGAGGUGCGAGCCUCUUUUUU	GUUGACAAAAUAAAAACAUC	..............(((((((((((....)))))))))))	-12.4	7
SP_1849	1757170	1757631	-	1757119	1433	100.915	51	UAUUUUGUCAACAAAAAAGAGGCUCGCACCUCUUUUUCUU	AUUUCUUUUUAUGAUUUAAU	.............(((((((((......)))))))))...	-9.4	7
SP_1851	1758573	1758977	-	1758534	1444	69.4231	39	AAGAAAGGUGAGUGGGAUAAAUUUAUCUCACUCAUUUUUA	AUUUAUGAGAUAUGUUAGAA	...((((((((((((((((....)))))))))))))))).	-19.1	5
SP_1854	1761891	1762898	+	1762947	726	20.7429	49	AAAAAACGAAUAGAGUUCUAAAACUCCUAUUCGUUUUUUA	UUCGAUUACAAUCAUAGACU	(((((((((((((((((....)))).))))))))))))).	-15.5	6
SP_1855	1762944	1763981	-	1762907	387	23.6939	37	UAAAAAACGAAUAGGAGUUUUAGAACUCUAUUCGUUUUUU	AUGUUAUCCUAUUCUUGAUU	.(((((((((((((.((((....)))))))))))))))))	-15	6
SP_1856	1763982	1764335	-	1763980	15	15	2	AUCUCAAAAUUAAACUUUAUAAGGAAGGAAAAUUUUAAAU	GAAAUCAGCAGUAUAUACAA	.....((((((...((((.....))))...))))))....	-2.5	5
SP_1858	1765602	1766138	+	1766231	526	7.30556	93	UUUUCAACAACAAAAGAGGACCCGCCGAUCCUCUUUUUCA	UACUAUAAAUCCUUGAUUAU	...........(((((((((........)))))))))...	-9.7	5
SP_1859	1766305	1767114	-	1766199	103	8.58333	106	UUAUAGUAUGAAAAAGAGGAUCGGCGGGUCCUCUUUUGUU	GUUGAAAAGAUAAAAAACUC	...........(((((((((((....)))))))))))...	-15.3	6
SP_1860	1767456	1768976	-	1767369	15072	453.914	87	AGAUAAAAGAAUGCUCAGACAAUUUCGUCUGGGCUUUUUU	GAUGUGAGAAUGACUGAAUG	......(((((.((((((((......)))))))).)))))	-14.6	6
SP_1861	1768969	1769697	-	1768873	53	3.54812	96	AUUUGCAGUUGUCGCUUUUGACCUUGUUACUAGCUAUUUU	GCUUGCGAUUCCCUUGGCUG	.............(((..((((...))))..)))......	-4.3	5
SP_1862	1769712	1770476	-	1769609	158	7.71087	103	UGAGAGAUGUCAACUUACAGAUUGAGGAUGGGGAAUUUAU	GGUUUUAGUAGGGCCUUCUG	..(((..(.(((.((((.....))))..))).)..)))..	-1.6	4
SP_1863	1770480	1770923	-	1770475	153	6.89633	5	UGGCGAAUCUGAAAGAGAAGGGAAAUGAGGUUUAGAAUAU	GUCACAACAAGUGAAAAAUG	....((((((.................)))))).......	-1.9	3
SP_1864	1771605	1771901	-	1771579	16034	44.819	26	UUAAAAUGCUUUGAUUCCAUUGUGGAUCAAAGCAUUUUUU	GUAAGAUCUAUCUCGUGAGC	..(((((((((((((((......)))))))))))))))..	-17	6
SP_1865	1771923	1772987	-	1771900	418	16.3684	23	UGAUUAAACAUUAUUAAACCAUAAGGGAGGUGGUAGGGAU	GGUAGAACCAAACCUAGAAA	.................(((((.......)))))......	-4.1	2
SP_RS12400	1778255	1778379	+	1778424	48	48	45	CAUCCUAUCAAGUUCACUCAAACCUGAUAGGAUGCGUUUU	UAUCAUUUUGAAAUCUAUUU	((((((((((.(((......))).))))))))))......	-15	5
F48	1778293	1778427	+	1778427	92	92	0	CCUAUCAAGUUCACUCAAACCUGAUAGGAUGCGUUUUUAU	CAUUUUGAAAUCUAUUUACC	(((((((.(((......))).)))))))............	-10.1	6
SP_1873	1778452	1778694	-	1778387	456	4.7874	65	AUAAAAACGCAUCCUAUCAGGUUUGAGUGAACUUGAUAGG	AUGCGUUUUAGAAUGUCAAA	............((((((((((((....))))))))))))	-14.2	3
SP_1874	1778694	1779416	-	1778613	120	5.87838	81	UUUAUCUCACCAGUCUUUCCACCCUCUUGUCGCUUUGAGC	UGACUUGUUCCAACUACAUG	.....((((..(((.................))).)))).	-1	3
SP_1875	1779403	1779972	-	1779358	95	4.26548	45	UUGCCCACGCAGGUGUGGCCAGUAGGAGAAAAGCAGAAGA	GCUGAUUAAGCAAGGCUUGG	..((((((....))).))).....................	-8.1	0
SP_1876	1779991	1780719	-	1779932	330	11.4064	59	UGAGUACUUUAGCAAAAAUAGAAGCGCUCUUGUUUGUAGC	GGGUGAAGAUGGGAUUCGGG	.((((.((((..........)))).))))...........	-5.3	4
SP_1877	1780719	1781459	-	1780583	47	2.89868	136	AAGUCAUCGAACAGUAUCUAGCCUAUGUCUCAACCCUGCA	GGCCAUGCGUCUGGAAGUGA	........................................	0	1
SP_1878	1781450	1781911	-	1781332	99	4.9104	118	AGCAAUUUUUAGACAUGGUAGGUGAGCGGAUUUCUGAGAC	CAGUCUCAAGAUUUACCAAG	......(((((((..(.((......)).)...))))))).	-3.9	2
SP_1879	1781908	1782429	-	1781881	61	2.93031	27	GUUUAGCCGAUGAUUGCCAAGGAGUUUGAGACUUUCUUGU	UGGGGCAGGAGGAAACUUUU	.................(((((((((...))).)))))).	-4.8	6
SP_RS09325	1782405	1783376	-	1782363	99	5.29556	42	AGCGAUUCCCAUGGCGAUAGCUUGAUUGUGGAAGAAGUCC	GUGAUCGCUAUGUGGGCAAA	.((..((((((.(((....)))....)).))))...))..	-6.8	1
SP_1881	1783373	1784167	-	1783308	255	12.5606	65	UGACCAGGACUGGUAUGUUGGGUCUUAUAGUAUUUUUGGU	GGCGUUAACAGUUUGAGCGA	..(((((((.((.((((........)))).)).)))))))	-8.6	6
SP_1882	1784375	1784623	-	1784335	16862	234.646	40	AUAAGGAAAAGUCUGGGAUGAAAGUUCCAGACUUCUCACU	AUGUUGGUUAUGGUUUAGGG	.....((.(((((((((((....))))))))))).))...	-16.5	4
SP_1884	1786682	1788799	-	1786565	134	6.61519	117	GCUUCCUAGUUUGUUCUUUGAUUUUCAUUGAGUAUAAUUG	AAAUAGCACAAAUAGGGACG	......((((((((((..(((...)))..))))).)))))	-1.8	4
SP_1885	1788834	1789544	+	1789575	3655	111.816	31	CAAGAAAUAAAAGACUGAGACACCAGAUCUCAGCCUUUUU	CGGCUCUAUAAUAUUUGUAG	........(((((.(((((((....).)))))).))))).	-9.7	5
R7	1791010	1791080	-	1790987	11103	261.247	23	GCUAAGCUCGAGAAAGGACAAAUUUCGUCCUUUCUUUUUU	GAUGUUCAAAGCGAUAAAAA	.........((((((((((.......))))))))))....	-13.2	7
SP_1887	1791100	1792026	-	1790987	11103	289.04	113	GCUAAGCUCGAGAAAGGACAAAUUUCGUCCUUUCUUUUUU	GAUGUUCAAAGCGAUAAAAA	.........((((((((((.......))))))))))....	-13.2	7
SP_1888	1792037	1793104	-	1791992	535	8.27101	45	AGGAAAUGUCUGAAAAAUUAGUAGAAAUCAAAGAUUUAGA	AAUUUCCUUCGGUGAAGGAA	........................(((((...)))))...	-0.5	3
SP_1889	1793113	1794039	-	1793085	1176	40.8123	28	ACACAUAGAUAGGAGUAGAAAUGACAAAAGAAAAAAAUGU	AAUUUUGACUGCUCGCGAUA	........................................	0	2
SP_1890	1794039	1795535	-	1793972	830	18.4926	67	AGUUUGUAAAACGUGACGAUUUUGCCUCUGAAACUAUUGA	UGCGCCAGCAUAUUCUUACU	(((((((((((((...)).)))))).....))))).....	-3.4	3
SP_1891	1795602	1797581	-	1795554	8659	67.7918	48	UAAUAGAACUUUCUCUCCAUGAGGAGAAGGUUCUUUUGGG	AUUUUUAAAGGAAAUAAUAU	(((.((((((((((((......)))))))))))).)))..	-15.7	4
SP_1893	1798266	1799459	-	1798221	9999	160.652	45	AUAAGUUUGAAAUCUUCUACCUUGGGUAGGAGAUUUUUUA	UACGAUGGGCAUGUCGUGCA	........(((((((((((((...)))))))))))))...	-15	6
SP_1895	1801397	1802230	-	1801266	117	8.88608	131	GUAACCAUACCUACGGCAAGGUGAAGCUGACGUGGUUUGA	AGAGAUUUUCGAAGAGUAUA	.....((.(((.(((...((......))..)))))).)).	-8.4	4
SP_1898	1804475	1806637	-	1804419	34	2.61538	56	AAGUUAGAUUUAUUCUGUCUAACUUUUGGGGUGCAGUUCA	AUAAGGGUGUAUAAAUUUAU	(((((((((.......)))))))))...............	-7.8	2
SP_1899	1806745	1807605	+	1807628	24	2.05714	23	AGAAAGGCAACAUUAUGAAAUCCUACCAAGCUGUCUACCA	AAUCCUAUCUAAAGAAACCG	....(((((......................)))))....	-1.9	2
SP_1900	1807602	1808537	+	1808619	1010	46.0486	82	GAUUAGUAAUUCAAUUAAGUUUUACGGAUCUGAAGUUUUA	UUGGCUCUAAAAAUAAAAAA	((((.((((..(......)..)))).))))..........	-5.3	4
trn0866	1808564	1808655	-	1808426	41	2.87719	138	AAGUUUUCCAUUUUCUGAGAUGUCUUUAGCAAGUCCCUUG	UAGUCUUUUUGCUCUAGUGU	.........((((.(((((.....))))).))))......	-1.6	3
SP_2253	1808663	1808750	-	1808566	1559	13.2631	97	CCGUAAAACUUAAUUGAAUUACUAAUCUGAAGUUAUUUUU	AUAUCGUUUAUAUUAUAAUU	......(((((....((........))..)))))......	-1.3	7
SP_2254	1808757	1808830	-	1808662	1453	22.115	95	CGGGUAACUGGCGCAAGGGUUCGAAUCCCUUAUUCUCCGU	UUUAAUGAGAGUCUGUAACU	(((....)))....(((((.......))))).........	-7.2	4
SP_2255	1808866	1808936	-	1808866	1627	38.9272	0	UUCCAAGCUGUUGUCGCGAGUUCGAUUCUCGUCACCCGCU	UUGAACUUUGUUCAAAUUAC	.....(((.(.((..(((((.......))))))).).)))	-7.4	1
SP_2256	1808956	1809028	-	1808866	1627	27.95	90	UUCCAAGCUGUUGUCGCGAGUUCGAUUCUCGUCACCCGCU	UUGAACUUUGUUCAAAUUAC	.....(((.(.((..(((((.......))))))).).)))	-7.4	1
SP_2257	1809032	1809105	-	1809030	1094	15.7211	2	UAACCCGAAGGUCGUAGGUUCAAAUCCUGCUCCCGCAAUA	AGGCUCGGUAGCUCAGUUGG	.........((..(((((.......)))))..))......	-8	1
SP_2258	1809119	1809208	-	1809119	8934	87.4059	0	CGUGUAAAAGCGUGCGUGGGUUCGAAUCCCACAUCCUCCU	UUUAUAUUAUUAACGCGGGA	(((......)))...(((((.......)))))........	-9	3
SP_2259	1809219	1809292	-	1809119	8934	94.9005	100	CGUGUAAAAGCGUGCGUGGGUUCGAAUCCCACAUCCUCCU	UUUAUAUUAUUAACGCGGGA	(((......)))...(((((.......)))))........	-9	3
SP_2260	1809306	1809379	-	1809304	624	13.5095	2	UACCCGGGAGGUCGGGGGUUCGAUCCCCUUCGCCGCUAUA	AUGAUCUUGUCGGACCUUUA	......((.(((.(((((......)))))..))).))...	-13.1	2
SP_2261	1809385	1809458	-	1809304	624	23.8897	81	UACCCGGGAGGUCGGGGGUUCGAUCCCCUUCGCCGCUAUA	AUGAUCUUGUCGGACCUUUA	......((.(((.(((((......)))))..))).))...	-13.1	2
SP_2262	1809474	1809547	-	1809472	902	32.9136	2	GAAUCAGGCGGUUAGAGGUUCGACUCCUCUAGGGUGCAUU	UUUCUAUUUAACUCGGGAAG	.......(((.(((((((.......)))))))..)))...	-11	3
SP_2263	1809557	1809642	-	1809472	902	30.6312	85	GAAUCAGGCGGUUAGAGGUUCGACUCCUCUAGGGUGCAUU	UUUCUAUUUAACUCGGGAAG	.......(((.(((((((.......)))))))..)))...	-11	3
SP_2264	1809650	1809721	-	1809650	4318	101.982	0	GCCAAGGUGGGGGUCGCGGGUUCGAAUCCCGUCGUUCGCU	UAGAGAGGCCGGGGUGGCGG	.....((((((.(..(((((.......)))))).))))))	-13	3
SP_2265	1809744	1809816	-	1809742	6976	40.8075	2	UAAUCAGAGGGUCGCGUGUUCAAGUCAUGUAGCCGGCAUU	UUUAGAUAGAAGAAAACAGU	......(..(((.(((((.......))))).)))..)...	-8.7	2
SP_2266	1809835	1809916	-	1809742	6976	68.2917	93	UAAUCAGAGGGUCGCGUGUUCAAGUCAUGUAGCCGGCAUU	UUUAGAUAGAAGAAAACAGU	......(..(((.(((((.......))))).)))..)...	-8.7	2
SP_2267	1809922	1809994	-	1809920	1143	16.0441	2	UAAUCAAUGGGUCACUGGUUCGAGCCCAGUACGGGUCAUA	UAUGCGGGUUUGGCGGAAUU	......((((.(((((((.......)))))..)).)))).	-8.8	2
SP_2268	1810019	1810091	-	1809920	1143	19.841	99	UAAUCAAUGGGUCACUGGUUCGAGCCCAGUACGGGUCAUA	UAUGCGGGUUUGGCGGAAUU	......((((.(((((((.......)))))..)).)))).	-8.8	2
SP_2269	1810094	1810166	-	1810017	1123	37.1744	77	CACGGCGAAGAUCGCGGGUUCGAUUCCCGUCGGGACCGUU	UAAGGUAACGCAAGUUAUUU	.((((......(((((((.......)))).)))..)))).	-11.7	2
SP_rrnaD5S	1810171	1810286	-	1810171	210	6.97417	0	GUUGGGGGUUGCCCCCUGUGAGAUAGGGAAGUCGCUUAGC	UCUAGGGAGUUUAGCUCAGC	((((((.(.....((((((...))))))....).))))))	-11.7	2
SP_rrnaD23S	1810362	1813265	-	1810307	5323	73.4524	55	AAAGCGAACGGUUUUCUUAAAUUGAAUAGAUAUUCAAUUU	UGAGUAGGUAUUACUCAGAG	(((((.....)))))...(((((((((....)))))))))	-5.9	5
SP_2270	1813389	1813461	-	1813388	73	4.08224	1	GCACGCAGGAGGUCAGCGGUUCGAUCCCGCUAGGCUCCAU	UGGUGAGAGAUCACCAAGUA	.......((((.(.(((((.......))))).).))))..	-15	2
SP_rrnaD16S	1813506	1815057	-	1813475	807	22.6262	31	UUCUAAGGAUAAGGAACUGCGCAUUGGUCUUGUUUAGUCU	UGAGAGGUCUUGUGGGGCCU	......((((((((..(........).)))))))).....	-3.9	5
SP_2271	1815312	1815383	-	1815169	2044	147.505	143	GUUGUCGCUUGAGAGAAGCAAGUGACAAAGACCUUUGAAA	ACUGAACAAGACGAACCAAU	.((((((((((.......))))))))))............	-12.2	3
SP_1901	1815445	1816800	-	1815443	65	4.0625	2	GAACUGAAGCUGUUGUAAAAUUAAUAAAAAAAGUUUAAAA	AAGUAGUUGACAAAGUUUGA	(((((.....(((((......))))).....)))))....	-3.7	3
SP_1903	1817703	1818236	+	1818274	7688	84.6579	38	UAAAGUUGUCAAAGGUCAGGAACAAAAUCCUGACCUUUUU	UGGUAGUAUAAAAUAAAUUG	..........(((((((((((......)))))))))))..	-16.7	5
Spy392987	1818303	1818365	-	1818241	11	11	62	ACUACCAAAAAAGGUCAGGAUUUUGUUCCUGACCUUUGAC	AACUUUACCGAUUCUUUAGU	.........(((((((((((......)))))))))))...	-18.1	3
SP_RS12415	1818590	1818943	-	1818457	107	107	133	UUGACCUGUAUUUUUUAUACUAAUCAUUUUCGUAUUUUUU	GUAUUAAACGAUAUAAGUUU	.(((...((((.....))))...)))..............	-2.5	7
SP_1906	1820362	1821984	-	1820225	11610	46.0174	137	GCUAAGCUCGAGAAAGGACAAAUUUCGUCCUUUCUUUUUU	GAUGUUCAAAGCGAUAAAAA	.........((((((((((.......))))))))))....	-13.2	7
SP_1907	1822000	1822284	-	1821983	320	14.7196	17	UUUUGGCAAUCAUUGAGGAAUAGAAGGAGAAAGUAAGUAU	GUCAAAAGAAAUUAAAUUUU	........................................	0	3
SP_1908	1822440	1822835	-	1822403	128	11.6364	37	UAAGAAUUAAAAAGUCUGAGUUGGUCUCAGGCUUUUUAUC	UUGAGAAAGUCAGACUUUUU	.......(((((((((((((.....)))))))))))))..	-15.9	6
SP_1909	1822913	1823674	-	1822872	1576	81.1674	41	AAAUUUUCUCGAAAAGUUACAAAUUUCUGUAACUUUUUUU	GAUUUCCUACGAAUAGAUAA	..........(((((((((((......)))))))))))..	-10	7
SP_1910	1823716	1824342	-	1823572	30	2.0122	144	UAUCUGGAGCAGGGUGAGGAUGUCGUUCUAACAGGACGAC	GGAUAGACAGACUAGAAGCU	(((((......))))).....((((((((...))))))))	-10	0
SP_1912	1824672	1824971	-	1824591	161	9.13974	81	AAAGCGGGCAAGAAGGUCUUCAUUUUUGUGGCAGACUGGU	GUAGCGAUUGUCGUUAUAUU	...((..(((((((........))))))).))........	-7	2
SP_RS09625	1825308	1825499	-	1825196	32	2.02105	112	GGUGCCUGGCAAUAAGAAUAAUACUCUUCGAAAAUCUCUU	CAAACCACGUCAGCUUCAUC	..(((...))).............................	-0.4	4
SP_1915	1826340	1826786	-	1826333	72	4.94118	7	CUCCUAAAAGAAAAUCUAAGAAACAUGAGGUAAAAAACAU	GAAAAAGAAAGCAUUUGGUA	........................................	0	1
SP_1916	1826900	1827403	-	1826777	11	11	123	UUGAUAUAGUAGAGUCAGAAAGGAGAUGUGAUGAAGUUAC	GAAUUGAGAUUGACGGCAAU	(((((........)))))......................	-1.8	2
SP_1917	1827400	1827762	-	1827364	41	4.1	36	AUGAAAAAUUAUCAAGAAUGGUAUCGAAAUAUCAGCUCCA	GACUAACUAGUUGUCCAAUU	...............((.((((((....))))))..))..	-2.8	1
SP_RS12430	1827828	1829729	-	1827795	29	29	33	AGAAUAAAUCAAAAGAAGGCUUGACGGCCUUCUUUUUCUU	AUUUAUACUAGUACACAUAG	..........(((((((((((....)))))))))))....	-13.6	7
SP_1922	1830299	1831015	-	1830249	22754	341.432	50	AGAACAUGAUCCUAAGUGAGAAAAUCACUUGGGAUUUUUU	UAAUCAAGAAAAUAGUUCUC	.......((((((((((((.....))))))))))))....	-16.4	6
trn0883	1831635	1831700	-	1831514	124	5.31076	121	AUCUUGGGAACACGUAAAUUAUACUCUUCGAAAAUCUCUU	CAAACCAUGUCAGCCCCAUC	.....((((...((..............))....))))..	-0.9	4
trn0884	1831707	1831795	-	1831705	12458	338.657	2	AAUUCCUUGAUAUACAGGGGAUUGAUUAUCCUUUACUUGU	UUUAGAUGAUUGGAAAUUCA	(((((((((.....))))))))).................	-8.5	5
SP_1923	1831896	1833311	-	1831786	291	7.02963	110	UAGCGAUUUCCAUUGGAGUAUGCUCGUGAUGUUAAAAUGA	AUCUAUCAAACAGAAUGUGU	.(((((((((....))))).))))................	-4.4	2
SP_1924	1833322	1833732	-	1833310	358	16.0667	12	UAUGCAACUCAAUCCAGGAACUUAUUAGGAGGUAGAAGAU	GGCAAAUAAAGCAGUAAAUG	.......((...(((............)))...)).....	-1.3	2
SP_1925	1833725	1834333	-	1833627	127	5.52486	98	GUGAAGAAUCAUAUGUAUAUCUGUAUUGACAACAGCAUGA	CUAAAAACAAAGAGUUGGUU	((((....))))........((((.......)))).....	-2.2	1
SP_1926	1834346	1834804	-	1834267	448	15.9799	79	UUGCUCUGGUUAAAAAAAGAAGCCGAUAAGGAAAAGAUGA	GCGCGACCCAGUGCCAGAUA	((.((.(((((.........)))))...)).)).......	-2.9	1
SP_RS12445	1834929	1835733	+	1835853	292	25.7647	120	CAACAUCUUCUGUACCAAUACUACAAUAUUGGUACAUUUU	GAUUACACAAUCGUUUCAAA	..........((((((((((......))))))))))....	-11.5	5
SP_1930	1836471	1836731	-	1836325	142	142	146	AGUAUCAAGGUUUUUCAAGACCUGAUAUUAUGCGUUUUUU	GCUUUUCAAAACUUUUUGCC	(((((((.(((((....))))))))))))...........	-9.4	6
SP_RS12450	1836771	1836910	+	1836926	13	13	16	AUUACUCAAUACCGAAUACCCCUGAAUGGUUUCUUUUUCA	UGCACCAAUAUAUUAUAAUA	.............(((.(((.......)))))).......	-2.1	5
SP_1937	1840405	1841361	-	1840331	33006	280.748	74	UUAUUAGGUCUUGAAAAAGCUUAAUAGUAUGCGUUUUCUU	GUGGAGAUAUUUCCUUCAAU	((((((((.(((....))))))))))).............	-6.5	6
SP_1939	1841737	1843107	-	1841654	56	3.35238	83	AAAAACUUGUGUUCUCUUCUUUAGUUUGGUGUUGAAAAUA	GUUUAACAGACUUUUGACUU	..(((((...(.......)...))))).............	-0.8	2
SP_RS12455	1843242	1843328	-	1843196	394	15.55	46	GAAACUAGAAUAGUACAUAUCUACUUCUAAAACAUUGUUA	AAAAUCGAUUUGACUUUCCU	.....((((((((.......))).)))))...........	-3.5	4
SP_1940	1843413	1844579	-	1843377	4042	84.6221	36	AUAAGCUGUUAAAGCAGUGGAGAAAUCCGCUACUUUUUCG	AUUUUUGAUUCAAGUUUUUA	.......(..((((.((((((....)))))).))))..).	-11.2	5
SP_1941	1844634	1845890	-	1844578	156	8.01284	56	AGAUAGGUCUGAGGAUCAUUAGAAUGUAGGAGAAUAGAAU	GGCGAAAAAACCAAAAAAAU	..(((..(((((......))))).))).............	-3	2
SP_1942	1845975	1846991	-	1845924	6599	114.288	51	AAUAAAAAAAUCAAUCGUAGGAAAAUUCCUGCGAUUUUUU	CAAAAAAAUACGAAUAGAUA	............((((((((((....))))))))))....	-13.1	6
SP_1943	1846999	1847517	-	1846990	346	11.7524	9	UGUUUACUUGAUGGGUAAACUGAUAGGUUAGUAGAAAUAU	GGUUAAAAAAAUUAUUGGAA	.((((((((...))))))))....................	-5.4	2
SP_1944	1847507	1847950	-	1847505	56	3.10393	2	CUGAGAAAUUGUUAGAGGAGCUUCAAUAUGGAGUAUGAAU	UGCUCAUUAGGGAAGCAGAG	((((.......))))....((((((...))))))......	-4.7	3
SP_RS12460	1848787	1848924	-	1848647	22	2	140	UAUAAUGAUUGGUAGGAAGGGAGAGAGAAGAUGAAAUCAA	UGAGAAUCUUAUUUUUGUUA	.....(((((........................))))).	-0.9	1
SP_1946	1849039	1849902	-	1848954	1351	89.2731	85	AGGCUGAUAGUUAGAUUAAUACUAUCAGCCUUAUAAUUAU	GUGACUCUGAGUCCGUCUCG	(((((((((((.........))))))))))).........	-16.2	4
SP_1947	1850094	1850264	+	1850361	49	2.4475	97	AUAUAGAGCAACUUAUUUAACUUUUUAUAAGGAGGAGUUA	UUACUUAUGACCAACUUUAA	.................(((((((((.....)))))))))	-4.8	2
SP_1948	1850367	1850591	+	1850701	63	3.10067	110	GUUUAUGGUGGCACAGAUGGUGCUGACCCUAGAUCAACAA	UUAUAUGUUCUGCUACAUUA	(((((.((((((((.....))))).))).)))))......	-11.2	1
SP_1949	1850598	1850786	+	1850861	1461	47.3013	75	UUUUCCUCUCUCGUAACUAAUAAUUUUGAGAGAGGUUUUU	UUUUAAAACAAUAGUAAGUC	....(((((((((.............))))))))).....	-13.1	5
SP_1951	1854242	1854946	+	1855074	31	2.17544	128	GAUUUUAAUUUCGUUAAUAUCAAUUACAUUACAUGAACUA	GGUCAUUUUUUAGUGGGAAG	(((.(((((...))))).)))...................	-2.3	2
SP_1952	1854927	1855856	+	1855868	86	86	12	UUAUUUUGAACAAGGAGGAAGUAUUGUGAAAAUUCCAAUG	AUAUAUCAAAUGGAAAAUUC	................((((............))))....	-2.6	3
SP_1953	1855853	1857961	+	1858037	78	7.42857	76	AAAAAAAAAUAUUGGACUUUAGCGAUAUUAUUCUUUUGUU	UGUUCAAUAAUUCUGUUACU	.......(((((((........)))))))...........	-4.3	6
SP_1954	1857985	1859723	+	1859777	55	2.17822	54	AGCCCUCUGAAAAAGUAAGUCCUACAGUUCAACUAAAAUG	AGUCAAAAGAUGAAUCACCU	.......((((...(((.....)))..)))).........	-0.9	2
SP_1956	1859774	1860541	+	1860544	69	4.45161	3	AAAACAAGAUGUCCAUGCUUGUUUUGAAGGGAGGUUAAUA	UGAUUGAACUUAAACAGGUG	.......(((.(((...(((......)))))).)))....	-5.5	3
SP_1957	1860543	1861175	+	1861299	28	2	124	UUUAGAAUUGUACUUUAUUAAUAUUGAGGUAACUUUUUCU	UGAUAAAGGAAGAAAUAAUG	...((((...(((((((.......))))))).....))))	-5.3	6
SP_1959	1862121	1862534	-	1862004	14667	477.144	117	UGAUAUCAAACUUUUUAGUUUUUGAUAUGGUGCGUUUUUU	GAUUAAGUGACUAUUAGUUU	(.((((((((((....)))..))))))).)..........	-5.5	6
SP_1960	1862645	1866295	-	1862608	7398	85.086	37	UAAGAGAGAAUGAGAGAACCCGAGGGUUCUCUCAUUCUCU	CUUCUGAAAACUUUCUCCAU	....((((((((((((((((....))))))))))))))))	-27.3	4
SP_1961	1866355	1869966	-	1866302	160	4.1221	53	AAUAGAAAGGGAAGAAAUAGUGGUUGAUGUAAAUCGUUUU	AAAAGUAUGCAAAUCACCCU	.....................((((......)))).....	-1.4	5
Lacto-rpoB	1870152	1870209	-	1870121	104	104	31	GUUAAAUCUUCUGAAAAAGUCAGAUUUAGCUGCUCUUUUU	GUGCUUUUUUUCAAGAUUUU	(((((((((.((.....))..)))))))))..........	-8.7	6
SP_1963	1870650	1871981	-	1870610	17436	403.728	40	ACUAGAGGCUUUUGUCACCAGGCGUGACGAAGCUUUUUUC	AAUUGAUUUCAAAAGGGAAU	...(((((((((.(((((.....))))))))))))))...	-14.2	6
srn435	1872034	1872146	-	1871914	21	21	120	UGCUACAAUUUGUUUUAUUGUUUAUCUUGACGGUAUUAAA	UGCCUUUUUCUCAGCCACAG	...............(((((((......))))))).....	-3.9	3
SP_1964	1872210	1873034	-	1872162	1800	40.9712	48	CCUAAACUCCUAUGUCACUUAUGGAUGUAGGAGUUCUUUU	UACUAGUUUAAGCAGGACUA	....((((((((((((.(....))))))))))))).....	-15.4	6
SP_1965	1873073	1873267	-	1873050	4297	85.8129	23	AAUUUACAGGAAAUUAGGCUGGAGAACCAGCCUUUUUCUA	AAGAUAAGGAGAAAUAUGAA	........(((((..(((((((....))))))).))))).	-15.6	6
SP_1966	1873254	1874537	-	1873120	200	9.05823	134	GGAAUCUUGGGCAAGGGUCAAGAUCCAUGGGCUAUCCUGU	CUCCAGCAAAAUGGCAGGAA	(((.((((((.(...).)))))))))(((((....)))))	-10.9	4
SP_RS09885	1874561	1874791	-	1874561	111	5.32066	0	GUAUCAUUUGUGGCAAGAAGCGCUUAGAGGAUUAUUAUGA	AAUCAAGAGUAAAGGAAACG	..(((.(((..(((.......)))..))))))........	-3.3	4
SP_1967	1874849	1875886	-	1874740	105	6.64557	109	UUAUUCACUCUAAGUAGUCAUAUGUUCUUUAUUUAUGUGA	GUUUUUACCUUUUAAAGGAU	....((((..(((((((...........))))))).))))	-4.7	4
SP_1968	1875870	1876358	-	1875857	53	3.34234	13	GAAAUAAGAAAUGAAAAAAAAGAUUAGAUGGCCCUUAUAC	GUCAUUGCGGCCUUGAUUGU	........................................	0	3
SP_1969	1876348	1876887	-	1876288	154	6.41667	60	CAUUUGAUCCGAUGACAAAUGGGCAUCUGGAUAUCAUUGA	ACGGGCGAGCAGACUUUUUG	......((((((((.(......))))).))))........	-7.2	3
SP_1970	1876952	1877944	-	1876922	26280	160.035	30	UAUUUUGUAGAGAAUCGAACCGCAAGGUUCGGUUUUCUUU	CUCUUUUUGUCUAUAAUUUG	........(((((((((((((....)))))))))))))..	-18.1	7
SP_1972	1878056	1878739	-	1878015	28878	279.577	41	AGGUCUAUGAAAUCAGUGUUUUGAGUGACACUGAUUUUUU	UUAAAUUUUCUCUUUUCUUU	........((((((((((((......))))))))))))..	-14.1	6
SP_1973	1878795	1879535	-	1878792	30	2.34375	3	GGUUGCAGCCGGUAUUUUAAUCUUCCAUUUAAGCUAAUUU	UAACUUUUUUUGUUAUAAUC	(((....)))..............................	-2.1	4
SP_1975	1879925	1880851	+	1880889	16955	185.086	38	UAAGAAGAAAAAGGCUUAGCUGAUUUGCUAAGUCUUUUUG	CAAGUCAAAAGCCCGAUGUU	.......(((((((((((((......))))))))))))).	-16.9	6
SP_1976	1880926	1881720	-	1880890	4171	107.917	36	AUAGAAAAGAAGCCUGAUGGAAACAUCGGGCUUUUGACUU	GCAAAAAGACUUAGCAAAUC	.......((((((((((((....)))))))))))).....	-18.2	5
SP_1978	1881846	1883096	-	1881755	41	2.5086	91	UAGGCAAAAAUCUUGUUUUUCCUUCAAGUCGUGAUAUAAU	AAAACUAUAAAACGUUUUCA	.(((.((((((...))))))))).................	-3.1	3
SP_1979	1883163	1883990	-	1883121	25747	585.825	42	GAUAGAACUAAAGGUUGGAACGAUUGUCCCAGCCUUUCUU	UGCAAACAGAAUAGAAGGAA	.........(((((((((.((....)).)))))))))...	-12.6	5
SP_1980	1884257	1885198	-	1884207	14702	224.166	50	AAAAUGAGCAUUUUUUAGGAUAAGAAUGUUCGUUUUUUUA	UGUGAAUAUGGUAUAAUAAG	(((((((((((((((......)))))))))))))))....	-13	7
SP_1982	1886446	1887108	-	1886392	73	4.80263	54	UUAUUCUAUUAUUAAUUGCCAAUCUAGCUGGUCUCUUUCU	GAUUUGGCAAAGGCAGGAUA	.................((((.......))))........	-2.4	5
SP_1983	1887071	1887727	-	1887045	146	10.882	26	AACAACUGGACUAGGGUUGCAGUUUUUGCAGGCGGAAACC	GCGGUCAUUAUCGGACAGAU	..(((((.......)))))..(((((((....))))))).	-7.2	0
SP_1984	1887738	1888616	-	1887632	219	12.8624	106	ACGUGAAAUCAAACGUCUAGAAGCAACUGGGGCAGAAUAU	GCCCAUAUCGAUAUCAUGGA	((((........))))((((......))))..........	-4.8	2
SP_1985	1888618	1889490	-	1888526	33	2.45845	92	GAUGGCCAGGUUUAUCAAACACGCGCGCGUGGGAAUUUCC	GUAAAAAAGGCCAUACCCCU	(((((......)))))...((((....)))).........	-5.3	3
SP_1986	1889621	1889935	-	1889565	1179	27.2776	56	UUCCAAGACUAUCUUUCUUCAUGAGGAAAGAUAGUUUUUU	GGUAUGAUUUUCAUUCCCAA	....(((((((((((((((....)))))))))))))))..	-15.6	6
SP_1988	1890565	1892607	-	1890475	36	2.55319	90	UCUCUGGUUUGAAUCUCAAGCUGGAGAAGGGCAAGGUUUA	UGCCUUAAUCGGAAAGAGUG	((((((((((((...)))))))))))).............	-13.7	3
SpR08_sRNA	1892645	1892717	-	1892603	121	5.19632	42	GUGGUCACCUUCUCACGAAGUGACCAAGUAACUUUUUGGA	GGAAAUGAUGAAACGUUUAU	.(((((((.(((....))))))))))..............	-12	5
SP_1989	1892864	1893763	-	1892784	312	19.102	80	CAAAACAGUUCUAAAGUUCGUCUUUAGGGAUGUUUUUUUA	GAUAUAAGCUAAAAAUGACA	.((((((.((((((((.....)))))))).))))))....	-10.4	7
SP_1990	1893835	1894395	-	1893762	192	16	73	ACAGUAUUUUUCGAAGCAGGUAGAAGAGGAGGCGUCUGAU	GUUAAUUGGUCAAAAAAUUA	.(((..((((((.............))))))....)))..	-3.9	3
SP_1991	1894395	1895168	-	1894367	105	6.61417	28	GACAGCAAGUAAUGAAAGAGAAAAUUUCUCAAGUUAUCGU	GGUUGAAGGGCGUGAUGAUA	........(((((....(((((...)))))..)))))...	-4.2	4
SP_RS10010	1895473	1896138	-	1895459	10	10	14	GAAGAAAGACUAGACGUAGAAAAUAGAACAGCUAGAAAAU	UCUAUUCUCUACUUAAAGUU	.........((((..((..........))..)))).....	-2.5	2
SP_1993	1896650	1896784	-	1896596	119260	326.874	54	AUCAAAAAUCAGUAGGAACUCGAGUCUACUGAUUUUUAUU	UUUGUAAAAAAGUUCAGUAG	...(((((((((((((........)))))))))))))...	-13.5	7
SP_1994	1896929	1898143	-	1896783	248	9.21552	146	GGCUAAACGAAUACAAAAUCUAUGAGGAGGUAUUCAUCGU	GAAACGUACUUAUCAACCAA	........((((((....((...))....)))))).....	-5.2	4
SP_RS10025	1898299	1898590	-	1898237	259	20.72	62	UAUCUCUACGUUCUUAACCUCGCCUUUAGCAAGGUUUUUC	UUCUAUACGAAACUAGUAAC	...............(((((.((.....)).)))))....	-6	5
SP_1996	1898755	1899207	+	1899240	1906	42.9925	33	CCUUAUAAUCACAAAGAAAAGGAGCCCCUAGCUCCUUUUU	GUUUACGAUUUAUUUCUCUC	...............((((((((((.....))))))))))	-12.4	6
SP_1997	1899242	1900630	-	1899214	1299	69.28	28	AAUAAAUCGUAAACAAAAAGGAGCUAGGGGCUCCUUUUCU	UUGUGAUUAUAAGGUUUUUU	...............((((((((((...))))))))))..	-12.4	5
SP_1998	1900696	1901658	+	1901678	106	7.10309	20	AAAGACUAUAUGGAAGGCUAAUACUCUUCGAAAAUCUCUG	CAAACCACGUCACGUCGCCU	..(((.....(.(((((.......))))).).....))).	-3.7	3
SP_RS10045	1901687	1902250	-	1901668	47	2.95695	19	ACAUACGGUAAGGCGACGUGACGUGGUUUGCAGAGAUUUU	CGAAGAGUAUUAGCCUUCCA	.......(((((.(.(((...))).)))))).........	-5.7	4
SP_1999	1902314	1903324	-	1902276	1899	34.6348	38	AGAAAAAAUCAGGGAAUCGAGAAGAUUUCCUGAUUUGGUG	CUCUUAAACAAGAGAUGUUG	.....(((((((((((((.....)))))))))))))....	-17.2	4
R9	1903548	1903638	-	1903548	325	24.375	0	UACUAUAACUUUAGGAGGGCUUAGUUUCCUCCUUUUUGUU	UAGUCUAAGGUGGUAGCAAG	......(((...(((((((.......)))))))....)))	-9.5	7
SP_2000	1903749	1904348	-	1903608	61	2.84926	141	AAACAUUGUUAGAAAUCGAUUUGACUGUCCUGAUCGAUUU	AUCCUGUUCUUAUUUCAUUU	............(((((((((.(......).)))))))))	-7.4	4
SP_2001	1904349	1905446	-	1904211	162	9.63057	138	GAAUGGGCAAGAAGCAAUCCAACUAUUAGAAAAGGAGUCU	GUAGAUAUCGCCAUCCUUGA	...(((((.....))...)))...................	-1.7	2
SP_2002	1905446	1906183	-	1905350	230	13.4049	96	AUUUUCCCCAUCCUGUCUGUAGUGACUGGGUGGCUUUCUG	CCUGGCAUUUAUUGAUUGAU	.......((((((.(((......))).)))))).......	-13.2	4
SP_2003	1906185	1907069	-	1906073	133	4.6677	112	GUCAGUAGGGAUGCCGACGGCUUUCUAUUUAUUUUUUUCU	GGUAUCUAUCAGGACACACC	...((((((((.(((...)))))))))))...........	-8.4	7
SP_2004	1907056	1907250	-	1906909	151	8.46729	147	GGAAGACCACACUCUUGGACUGUCUGCUUGGAGAUAAACU	GGUCACAAGCGGUCAAGUAU	......(((......)))..(((((......)))))....	-4.8	2
SP_2005	1907247	1907378	-	1907162	131	6.2828	85	GGUUAGUGGAAAUGUUUACAGGUUGGUUUGACCAAACCUU	GCUUCGCCAAUUCAUUCGUG	.....(((((....)))))((((((((...))).))))).	-7.7	2
SP_2273	1908042	1908115	-	1907956	939	36.6695	86	UAUACAUUAAGAGGGAAUCAGUUUGGUUCUCUCUUUUUUG	AUUUUCAGUAAUUCAUUUUG	........((((((((((((...)))))))))))).....	-13.5	6
SP_2274	1908131	1908204	-	1908129	958	31.1665	2	GAAUCAGGCGGUUAGAGGUUCGACUCCUCUAGGGUGCAUU	UUUCUAUUUAACUCGGGAAG	.......(((.(((((((.......)))))))..)))...	-11	3
SP_2275	1908214	1908299	-	1908129	958	32.6316	85	GAAUCAGGCGGUUAGAGGUUCGACUCCUCUAGGGUGCAUU	UUUCUAUUUAACUCGGGAAG	.......(((.(((((((.......)))))))..)))...	-11	3
SP_2276	1908307	1908378	-	1908307	4366	103.299	0	GCCAAGGUGGGGGUCGCGGGUUCGAAUCCCGUCGUUCGCU	UAGAGAGGCCGGGGUGGCGG	.....((((((.(..(((((.......)))))).))))))	-13	3
SP_2277	1908401	1908473	-	1908399	6805	40.081	2	UAAUCAGAGGGUCGCGUGUUCAAGUCAUGUAGCCGGCAUU	UUUAGAUAGAAGAAAACAGU	......(..(((.(((((.......))))).)))..)...	-8.7	2
SP_2278	1908492	1908573	-	1908399	6805	66.2241	93	UAAUCAGAGGGUCGCGUGUUCAAGUCAUGUAGCCGGCAUU	UUUAGAUAGAAGAAAACAGU	......(..(((.(((((.......))))).)))..)...	-8.7	2
SP_2279	1908579	1908651	-	1908577	1089	15.1515	2	UAAUCAAUGGGUCACUGGUUCGAGCCCAGUACGGGUCAUA	UAUGCGGGUUUGGCGGAAUU	......((((.(((((((.......)))))..)).)))).	-8.8	2
SP_2280	1908676	1908748	-	1908674	1114	17.2126	2	CACGGCGAAGAUCGCGGGUUCGAUUCCCGUCGGGACCGUU	UAAGGUAACGCAAGUUAUUU	.((((......(((((((.......)))).)))..)))).	-11.7	2
SP_2281	1908751	1908823	-	1908674	1114	36.1969	77	CACGGCGAAGAUCGCGGGUUCGAUUCCCGUCGGGACCGUU	UAAGGUAACGCAAGUUAUUU	.((((......(((((((.......)))).)))..)))).	-11.7	2
SP_rrnaC5S	1908828	1908943	-	1908828	238	9.2607	0	GUUGGGGGUUGCCCCCUGUGAGAUAGGGAAGUCGCUUAGC	UCUAGGGAGUUUAGCUCAGC	((((((.(.....((((((...))))))....).))))))	-11.7	2
SP_rrnaC23S	1909019	1911922	-	1908964	5487	72.567	55	AAAGCGAACGGUUUUCUUAAAUUGAAUAGAUAUUCAAUUU	UGAGUAGGUAUUACUCAGAG	(((((.....)))))...(((((((((....)))))))))	-5.9	5
SP_rrnaC16S	1912163	1913714	-	1912132	807	47.4706	31	UUCUAAGGAUAAGGAACUGCGCAUUGGUCUUGUUUAGUCU	UGAGAGGUCUUGUGGGGCCU	......((((((((..(........).)))))))).....	-3.9	5
SP_2283	1913969	1914040	-	1913826	2002	126	143	GUUGUCGCUUGAGAGAAGCAAGUGACAAAGACCUUUGAAA	ACUGAACAAGACGAACCAAU	.((((((((((.......))))))))))............	-12.2	3
SP_2006	1914134	1914613	-	1913997	37	2.51456	137	CGUUGGUCAAGGGGUUAAGACACCGCCUUUUCACGGCGGU	AACACGGGUUCGAAUCCCGU	((((((..(((((((......))).))))..).)))))..	-12.5	1
SP_2007	1914735	1915271	-	1914705	41339	509.924	30	AGAAUUAUAACCCUGAGAGAGGCUGGAGCUUCUCUUUUUU	GUGCAGUUUAGGAGCUAAAG	..............(((((((((....)))))))))....	-11.8	7
SP_2008	1915326	1915502	-	1915265	1036	25.4323	61	ACUAGAAAUCUUCUAUUUAUGAAAGGAAAUAUCAUGGAUA	GUUUUGAUAAAGGGUGGUUU	.............(((((((((.........)))))))))	-4.3	2
SP_2009	1915512	1915664	-	1915384	1695	46.5795	128	GUUCUAUCAUGGAAUACACAGCUUUCUUUGUAGUAAUUAU	UUACAUUUUUGACCAGUUGA	...(((.((.((((.........)))).))))).......	-3.2	4
SP_2010	1915717	1917912	-	1915698	66	3.28736	19	AUAGUCAAUCUAUUUCGCUAAGAUGCUUGUCAAAGCCUAG	CUUUCUUGUUAUAAUGGAUA	.((((.((.....)).))))....((((....))))....	-3.8	1
SP_2011	1917999	1918874	+	1918894	1807	112.062	20	GAAUUAAAAAAGAAUGGAUGAUCGUGUCAUCCAUUUUUCC	AUAUAAAAAAGCAAGACCAC	.........(((((((((((((...)))))))))))))..	-13.9	5
SP_2012	1918942	1919949	-	1918898	148339	435.199	44	UGAGUUGAUAGAAAGCAAGGCUUUGUGGUCUUGCUUUUUU	AUAUGGAAAAAUGGAUGACA	.........(((((((((((((....))))))))))))).	-15.7	6
SP_RS12475	1921149	1921994	-	1921033	85	5.26059	116	UUACUAUAGAUGGGCAAGAAAUGGAUCUGAGUCAAACGAU	GCCUUCUUAUGCUCAAGUAG	..(((.(((((.............))))))))........	-3.1	1
SP_2016	1922125	1923024	-	1922125	57	3.16353	0	UGAUUUUUCCAUGAAGGGGUUAACCUACCUUGAUGUCUAA	GUUGUAAAAUAAACUAACUU	.........(((.((((..........)))).))).....	-7.2	3
SP_2018	1924622	1924812	+	1924878	14	14	66	UAGAUCAGGAUAGUCAAAUCGAUUUCUAACAAUAUUUUAG	AAGUAGAUGUGUACUAUUCU	((((....(((......)))....))))............	-3.3	5
SP_RS10215	1924910	1925104	-	1924844	638	16.5335	66	CUACUUCUAAAAUAUUGUUAGAAAUCGAUUUGACUAUCCU	GAUCUAUUUGUCCUGUUCUU	................((((((......))))))......	-2.5	3
SP_2020	1925563	1926291	-	1925553	33	2.17582	10	AAUUCUUUUGCAUUACGACAUUCCUCCUAGGAGAAAAUGU	GAAAAUGAAGCCAAUCUUUU	.................(((((.(((....)))..)))))	-4	2
SP_2021	1926407	1927858	+	1927877	64	4.72906	19	UGAAGUAGAAAUUGAGGAGUAAAGAGAGGAGAUAUUCAUA	UGAAAAACUCAAAAUUUAUA	................(((((...........)))))...	-0.8	4
SP_2024	1929463	1929789	+	1929909	4544	228.835	120	AGGAUUGGAUCCUGCAUUACACAAGAUCCAAUCCUUUUCU	UUUACUCUAGUUUUUAUAAU	(((((((((((.((.......)).))))))))))).....	-16.7	5
SP_2026	1930775	1933426	-	1930658	5237	46.5381	117	CCUAUCAAGGUUUUUGAACACCUGAUAGGAUGCCUUUUUA	UGAUAUUGAGGCCUUUUUGC	(((((((.(((........))))))))))...........	-11.8	5
SP_2027	1933726	1934136	-	1933699	13555	200.54	27	UCAACAAAAAUAAAGCCUCCUUAUCAAAGGAGGUAUUAUU	AGAAUCGCAAGGUAAGCGCU	........(((((.((((((((....)))))))).)))))	-13.6	5
SP_2028	1934138	1934566	-	1934123	170	5.04377	15	AGAACGUUUAGAAAAGGAGAGUUAAGGUGGAAAAUCUUAC	GAAUUUUUACGAAAAGUAUC	......................((((((.....)))))).	-3.2	3
SP_2029	1934612	1934911	-	1934585	1074	25.4021	27	AAUUGAAAAAUAAGACGGGAUCACGAACUCCCGUUUUCUA	UAAAAGAAAGGAAAUGGGAU	...........(((((((((........)))))))))...	-11.2	5
SP_2030	1935028	1937004	-	1934993	11653	60.3667	35	AAUAAUCCUAAAAAUCAGGGCGUAAGCUCUGGUUUUUCUU	ACCAGAAAAGUAAGGUACAA	.........((((((((((((....))))))))))))...	-14.4	7
SP_2031	1937118	1938209	-	1937062	43	43	56	GGAGGUUAUCCGUAUGUUGCAUGAUACGGAUAAUUUUCAU	AUAAUAGUAAAAUAGAAUGU	(((((((((((((((........)))))))))))))))..	-19	5
SP_2032	1938321	1939994	-	1938273	58	58	48	CCAAUGAUGAACACAAACCUGUGUUUUUCUUGGUCUUUUU	UAGUGUUUUGAAGGGUGGUA	((((.((.(((((((....))))))).)))))).......	-11.7	6
SP_2033	1940173	1940877	-	1940126	27	27	47	GAAGGAGGAGAAAAAGAUAAAUUUAGCUCCUCUUUUUACA	UUUGAUUUUUAUUGAGAGUA	((((((((((..(((......)))..))))))))))....	-13.7	5
SP_2037	1942990	1943271	-	1942928	14	14	62	AAACUGAGAGUUAUCGUUUCUGUCCUUCUCCCUCUUUAAA	UAAAGGAGGCAGAUAUGAAU	.....(((((...............)))))..........	-1.7	4
SP_2039	1944882	1945505	-	1944810	948	52.6667	72	CCAAGAGUGAACAGUCCGCUGUGUAAUUCUUGGUCUUUUU	GUUUGCGCUUUCGCAUUAUA	((((((((..((((....))))...)))))))).......	-13.5	6
SP_2040	1945556	1946542	-	1945528	8481	120.332	28	GAUACAGAAUAAGUAAAAUCAGGUUUAUCCUGAUUUUUUG	CUAGUUAGAGGAGGUUAAAC	..............(((((((((.....)))))))))...	-9.6	6
SP_2041	1946561	1947391	-	1946467	173	6.59619	94	AUCCAGAAAGGAUUGAAAGAAUUAGAUAUUCCAAGAAUGA	AGGCUCAUAUCAAAGUCAUU	((((.....)))).....((((.....)))).........	-2.8	1
SP_2042	1947360	1947731	-	1947271	198	7.79975	89	GUAACUAGCGAUAUUACAGCCGAAUCGGCUGAUUUUUGGA	GUAAAUUGGUUUACUUCUUU	....((((.(((....((((((...))))))))).)))).	-9.1	5
SP_2044	1947880	1949070	-	1947818	12708	108.663	62	UACAAGGAGUUGGGAAAGUUAUUUUUCCAGCUUCUUUUUC	UGAUGAAAUUGUCCAAAACC	...((((((((((((((.....))))))))))))))....	-15.9	6
SP_2045	1949121	1950074	-	1949093	26	2.19718	28	ACUGAAAUAUAAAAUAGAUUUUGUUAUAAUAGUUGAAAAC	GCUUAAAAAGGGGUAUCAUG	((((....((((((....)))))).....)))).......	-0.7	2
SP_2054	1954652	1955023	-	1954620	6885	106.279	32	UAAAAUAGAGAAAAGUAACUUUUUUGGAGUUGCUUUUUUU	AUUUUUCUAACUCUUUGCGA	.......(((((((((((((((...)))))))))))))))	-12.4	7
SP_2055	1955168	1956226	-	1955101	22740	247.455	67	AAAUAGAAAUUCAGUCAUCCAUCAGAUGGCUGGAUUUUUU	AUCAAAAAAUUAAGAAAUGA	....(((((((((((((((.....))))))))))))))).	-16.7	6
SP_2056	1956389	1957540	-	1956349	4030	75.8787	40	GAGAGAAAGCAGAAGUUAGAGACUAACUUCUGCUUUUUUA	UGCAGGGUACUUUACUGGUA	..(((((((((((((((((...))))))))))))))))).	-21.7	6
SP_2057	1957693	1959510	-	1957647	15982	195.081	46	UUAAAAAAGAGAAGAGUUGGAGAAAUCCAGCUCUUUUAAA	AUAUCUCCAAAAAAUAGGUC	.........((((((((((((....))))))))))))...	-16.5	4
SP_2058	1959608	1960750	-	1959559	5548	35.0883	49	GAUAUAAAAAAAUCCUAAGUUUUCUCUUAGGAUUUUUCUU	CUUUUUUUGAUAGAAUAAAG	.......((((((((((((......))))))))))))...	-13.2	7
SP_2059	1960880	1961737	+	1961762	2214	161.018	25	ACGUCCAAAAGCUUGAAGGUUUUUCCCCUCAAGCUUUUUU	CUAUCAAUGAGUUUCUCCGC	......((((((((((.((......)).))))))))))..	-13.5	6
SP_2060	1961765	1962409	-	1961724	1364	102.943	41	AGAAAAAAGCUUGAGGGGAAAAACCUUCAAGCUUUUGGAC	GUUUUCGGGCCAAUACUGCU	....(((((((((((((......)))))))))))))....	-19.4	4
SP_2063	1963634	1964746	-	1963560	62666	330.936	74	UCUAGCUUUCGUGAUGGAAAGCGAUUCUCGUUCGUUUUUU	CUUUGUCAUACUCUUCGAAA	....((((((......))))))..................	-8.1	6
SP_2064	1964912	1965532	-	1964802	1959	52.9459	110	AAUAGACAGUUCUGUUAAAUAGGCCCGAGAGGGCUUUUUU	UCUACAUUUUUUGUGUUAUG	((((((....))))))....((((((....))))))....	-12	6
SP_2066	1966877	1968361	-	1966831	3302	67.4642	46	GGGAGCAAACUCGGUUGGGAAACCAACUGAGUUUCUUUUC	AUCAGGAGGAGAGAUUGUUU	.((((.((((((((((((....))))))))))))))))..	-20.1	6
SP_2067	1968437	1969714	-	1968332	75	3.36323	105	AUAGAGAGUAAUGACAUUAGUUUAUCAAUCAACGCGUGAU	GCCAACAAUACAGUAACUGC	..............(((..(((........)))..)))..	-0.7	2
SP_2284	1969821	1969904	-	1969779	1662	64.3732	42	GUAUAGUGUUAGGAACGUUGUUAUUCUUCGUUCCUUUUUU	AUAUUAUUUUUGGUAUAAUU	..........(((((((..(.....)..))))))).....	-9.8	6
SP_2285	1969914	1969985	-	1969779	1662	54.2047	135	GUAUAGUGUUAGGAACGUUGUUAUUCUUCGUUCCUUUUUU	AUAUUAUUUUUGGUAUAAUU	..........(((((((..(.....)..))))))).....	-9.8	6
SP_2286	1969996	1970068	-	1969913	424	11.6783	83	UGACUCCCUCAUGCGUUGGUUCGAAUCCAGCUACCCCAGU	UACUAUUUGCCGGCGUGGCG	..............(((((.......))))).........	-5.5	1
SP_2287	1970083	1970153	-	1969994	321	7.93723	89	GGCUCUGGCAUGCGUGGGUUCGAUCCCCAUCACUCGCCUA	UUUUAUAUUGGGGUAUAGCC	......(((.((.(((((.......)))))))...)))..	-9.8	2
SP_2288	1970158	1970238	-	1970158	741	20.3915	0	CGCUCCUUCGGGUUCGGGGGUUCGAAUCCCUCCCCUUCCA	UUUUACGGGCAUAGUUUAAA	.........(((...((((((....)))))).))).....	-11.2	2
SP_2289	1970251	1970323	-	1970251	946	17.1094	0	GAAGCUCCAUGUGUCGGCGGUUCGAUUCCGUCUCGCGCCA	UUUAUAUAUUUUGGAAGGGU	..........((((.(((((.......)))))..))))..	-9.5	1
SP_2290	1970327	1970400	-	1970325	1113	15.0345	2	UAACCCGAAGGUCGUAGGUUCAAAUCCUGCUCCCGCAAUA	AGGCUCGGUAGCUCAGUUGG	.........((..(((((.......)))))..))......	-8	1
SP_2291	1970411	1970500	-	1970411	8945	79.073	0	CGUGUAAAAGCGUGCGUGGGUUCGAAUCCCACAUCCUCCU	UUUAUAUUAACGCGGGAUGG	(((......)))...(((((.......)))))........	-9	3
SP_2292	1970583	1970656	-	1970501	546	5.74008	82	CACUAAGAGGACACGGGCUUGUUCCCGUAUAAACUAUUUU	GGAGGAUUACCCAAGUCCGG	............(((((......)))))............	-6.6	5
SP_2293	1970691	1970761	-	1970691	1658	26.4189	0	UUCCAAGCUGUUGUCGCGAGUUCGAUUCUCGUCACCCGCU	UUGAACUUUGUUCUUUGUAC	.....(((.(.((..(((((.......))))))).).)))	-7.4	1
SP_2294	1970767	1970839	-	1970691	1658	51.348	76	UUCCAAGCUGUUGUCGCGAGUUCGAUUCUCGUCACCCGCU	UUGAACUUUGUUCUUUGUAC	.....(((.(.((..(((((.......))))))).).)))	-7.4	1
SP_rrnaB5S	1970844	1970959	-	1970844	201	5.22329	0	GUUGGGGGUUGCCCCCUGUGAGAUAGGGAAGUCGCUUAGC	UCUAGGGAGUUUAGCUCAGC	((((((.(.....((((((...))))))....).))))))	-11.7	2
SP_rrnaB23S	1971035	1973938	-	1970980	5387	87.8683	55	AAAGCGAACGGUUUUCUUAAAUUGAAUAGAUAUUCAAUUU	UGAGUAGGUAUUACUCAGAG	(((((.....)))))...(((((((((....)))))))))	-5.9	5
SP_2295	1974062	1974134	-	1973940	38	2.42857	122	GUAGUAUUAAUAAGAGUUUAUGACUGAAAGGUCAGAAAAU	AAGGUUAAGUUAAUAAGGGC	...............((((.(((((....)))))..))))	-4.5	1
SP_rrnaB16S	1974179	1975730	-	1974148	757	33.6444	31	UUCUAAGGAUAAGGAACUGCGCAUUGGUCUUGUUUAGUCU	UGAGAGGUCUUGUGGGGCCU	......((((((((..(........).)))))))).....	-3.9	5
SP_2296	1975986	1976057	-	1975842	629	46.0244	144	GUUGUCGCUUGAGAGAAGCAAGUGACAAAGACCUUUGAAA	ACUGAACAAGACGAACCAAU	.((((((((((.......))))))))))............	-12.2	3
SP_2068	1976179	1976613	-	1976152	6324	108.459	27	UAAUGAGCGAUAGAAGAGUCAGUAUAAUUCUGGCUUUUUU	UACUAUAAGUUGAAAAAAUA	...........(((((((((((.......)))))))))))	-10.3	6
SP_2069	1976627	1978087	-	1976615	72	3.34236	12	AAACAUGCUAAAAGAAAUCUCUAAAUAAAGAGGAUACAAU	AAUGGACAUCUGGGAAAAGA	..................((((......))))........	-3.2	2
SP_2070	1978211	1979560	-	1978176	39443	258.85	35	UAUAAUAGAAGAAAAGAGUGGUUUGCCCACUCUUUUUACU	CUCUUUAUCCAUAGAAAUUG	..........(((((((((((.....)))))))))))...	-14	6
SP_2072	1979730	1980419	-	1979702	159	7.95	28	AAUGAACUGUAACGAUUGGAACAUCUGGUCGUUCUUUCUU	UUAUUUUUUCAAAAUUUUUA	...(((..(.((((((((((...))))))))))).)))..	-9	6
SP_2073	1980558	1982324	-	1980524	8230	108.468	34	GAAUAAGAAAGAAGUUGUCCUAUGUGGGCAGCUUUUUCUU	GUCCAUAAAAAAUGUUUAUC	....((((((((.(((((((.....)))))))))))))))	-16	7
SP_2075	1983116	1984810	-	1983112	45	3.02885	4	GCCGUUUACCGUGAAAUCUAUGAAACACAGAAAUGAAAGA	CAAACUAUAAGAAAAGUCAA	..(((((.(.(((............))).)))))).....	-2.9	1
srn477	1984831	1984969	-	1984829	4346	132.702	2	GAAUGAAAAGGAGCUGACGCAUUGUCGCUCCCUUUUGUCU	AUUUUUUAAGGAGAAAGUAU	..((((((.(((((.(((.....)))))))).))))))..	-13.4	6
SP_RS10575	1984957	1987490	-	1984829	4346	111.631	128	GAAUGAAAAGGAGCUGACGCAUUGUCGCUCCCUUUUGUCU	AUUUUUUAAGGAGAAAGUAU	..((((((.(((((.(((.....)))))))).))))))..	-13.4	6
trn0978	1986229	1986311	-	1986100	43	2.4018	129	AGAUUGACUACAAUAAAAAGGAUGGCUACUAUUUUCAUGU	GACCAAUUCGCAACUAGGAA	..((((....))))....(((((((...))))))).....	-1.6	5
srn478	1986359	1986458	-	1986210	29	2.26241	149	UGGAUUUGAUGAGACUUUAGACAAGUAUCGUUGCGUUCUC	AGAGAAGGGACUAGCUGGAU	.((((.((((((.((((.....)))).)))))).))))..	-7.4	3
SpR10_sRNA	1987487	1987533	-	1987362	185	6.35996	125	UGAUUUUUAUGAAUUAUUUUAUGAGGAUGCGGUCAAUGCU	GCGCAGAUUCUGGAAAUUUC	..(((((((((((....)))))))))))(((.....))).	-7.7	3
SP_2077	1987541	1987987	-	1987509	4120	76.7335	32	AUAAGUAAGGUCUUGGGAGUUGCUCUCAAGACUUAUUUUU	GAAAAGGAGAGACAGAAAAU	..(((((((.(((((((((...))))))))))))))))..	-15.8	7
SP_2078	1988123	1989814	+	1989937	2354	46.9041	123	UUUUAGGACAUAAAUAUGAUCGAUUUAUGUCCUAAAACGU	CGUAAUCUUAAAGUUAUUGG	(((((((((((((((.......)))))))))))))))...	-15.9	2
SP_2081	1990648	1991157	+	1991205	67	3.33779	48	AGGCAAAUUUAAUCUGAUUUAGCAAUGUUAGGAUUUCUGA	UAAUUGUGUUAUAAUGUUAC	..(((((((......))))).)).................	-2.8	4
SP_2082	1991241	1991948	+	1992001	209	10.5323	53	CUUCAAUUUUGGCUAGUCAAUCUAAGUGUUAGCCUCAUUC	UGAUUGCAGGGAUGGCAUUA	..........((((((.((.......))))))))......	-7	3
SP_2083	1991949	1993280	+	1993331	15788	204.988	51	AGCUAUUUUUAGGAGCAGCCAUUUUUCAAAAGUGGCUUUU	UUUGAUUCUUUACACAAUCU	.(((.........)))(((((((((...)))))))))...	-10	5
SP_2084	1993384	1994322	+	1994420	348	8.24645	98	AAGAAGGCAAGUAGGGAGGUGUCGUAUCUCCCUUACUUUC	UUCACUAGAAAGGACAAGAU	........(((((((((((((...)))))))).)))))..	-14	5
SP_2085	1994440	1995303	+	1995334	11	11	31	UUAUGAGUAAAUACCUGCUAAAACUUCUCGUUUAUUGUUU	UUCAGCUUUAACCUUUGGCU	..(((((...................))))).........	-1.7	6
SP_2088	1996880	1997530	+	1997577	229	229	47	UAAUCCUUAAAAGAGAAGAGUACGAUUAAGUACUCUUUUU	UAUGGUUGUAAAAAAGUUCA	............(((((((((((......)))))))))))	-13.1	6
SP_2091	1998790	1999806	+	1999829	571	24.3881	23	GAAAAUGAGUGGUCUUAACCCUCUAUAGAAAGGAUUUUUA	UGACAUCAAAAGUUAGAAAG	......(((.(((....)))))).................	-5.3	5
SP_2092	1999828	2000727	+	2000828	374	9.43462	101	ACCUAUUUAAUAAAAACUAAUGAAAACGCUAUACUUGUAU	UUGUUUUUUCAUUAAAAUAA	........................................	0	4
SP_2093	2001145	2002086	+	2002163	3728	72.0081	77	AAAACACAUUAAAAGCUACUCAUUUUUUAAGUAGCUUUUU	UCUUAUUCAAGUUUACAUAU	..........((((((((((.........)))))))))).	-9.7	5
R11	2002164	2002195	-	2002131	324	15.4286	33	GAAUAAGAAAAAAGCUACUUAAAAAAUGAGUAGCUUUUAA	UGUGUUUUGGAACCAUUCGA	.........((((((((((((.....))))))))))))..	-13.3	4
SP_RS10660	2002188	2002373	-	2002131	324	8.88483	57	GAAUAAGAAAAAAGCUACUUAAAAAAUGAGUAGCUUUUAA	UGUGUUUUGGAACCAUUCGA	.........((((((((((((.....))))))))))))..	-13.3	4
SP_2094	2002387	2003064	-	2002365	39	2.17377	22	AAGGGAAUGGGAUUGUGACGACUAAUACUCAAUGAAAAUC	AAAGAGCAAACUAGGAAGCU	.......(((((((((....)).))).)))).........	-3	2
SP_2095	2003048	2003587	-	2002950	76	5.84615	98	AUGUUGGUCACUGCAGGCGGAAACUUUGACAGGGCAGAUA	CAUUAUUUCGAUUUGGAGCC	.((((.(((.(((((((.(....))))).)))))).))))	-8	1
SP_2097	2004797	2005495	-	2004750	2732	61.1968	47	AGUAAAAAAGAGGCGGAACCCUUUUUCCAGCCUCUUUCUG	CUAUAUCGGAGGACAGAUAG	......((((((((((((......)))).))))))))...	-15.3	5
srn491	2005533	2005674	-	2005532	1077	61.1932	1	AAACAGACAAAAAGGUUUCAAAUUUGAGGCCUUUUUUGGU	AGAAUAGGUAUCAUUAUAAC	........((((((((((((....))))))))))))....	-12.1	6
SP_2098	2005725	2006636	-	2005639	54	3.36	86	UAAAACACGGGGAGAUAGUUGUGAAGAGUGUUUUUAGGUU	GUAUCGGUAGGGGCUUGCUU	.(((((((...................)))))))......	-4.3	5
SP_2099	2006701	2009166	-	2006657	5723	149.901	44	CUAAAUGAAGUGGCCAAUCAAUGGAUUGCCACUUUUUUCC	UUUCGUGUUACAAUAAGGGU	......((((((((.((((....)))))))))))).....	-13.8	6
SP_2100	2009308	2010564	+	2010624	29331	273.99	60	UAAACAAAGGAGUUAACCUCGAGAAAGGUAACUCCUUUUU	GCUGUUAAUAACUCUCAUCU	.....((((((((((.(((......)))))))))))))..	-14.8	6
SP_2101	2010642	2012705	-	2010585	5264	230.372	57	CAAAAAGGAGUUACCUUUCUCGAGGUUAACUCCUUUGUUU	AUAGAUAAAUGUUGAAUAGU	...((((((((((((((....)))).))))))))))....	-16.3	6
SP_2102	2012707	2012985	-	2012706	266	7.32614	1	AAAAAAGAAGAGCAAUUAGAUAGCCUUAUAGGUGAAUAAU	AUGUCUUUUAAAGUGCUACA	..............((((....((((...))))...))))	-3	3
SP_2103	2013137	2013985	+	2014001	69	5.62222	16	GAUUUUGGUUGGGAAAGCAUUCUAAUACUCUUCAAACCAC	GUCAACGUCGCCUUGCCGUA	.....(((((.(((.((..........)).))).))))).	-5.1	0
SP_RS10715	2013982	2014176	-	2013881	15	15	101	UUUUGCUCUGGUCAACGUGAAAGAGGAGAGGAGUCAUACU	GAGUAGGGCUUGGAGUUGUU	....(((((..((..(......)..))..)))))......	-7.4	3
trn1009	2014191	2014265	+	2014267	23	23	2	AGGUACACAAACCUUAAUCUUAUGCGUUUUGUUAUAGUUU	CCAUACACAUUAAGGGGAAA	((((......))))..........................	-2.3	5
SP_2106	2016399	2018657	-	2016265	732	14.6775	134	UGAUUUUCAUUGAGUAUAAGAUACAAAUUUAUACUAAUAC	AUUUUGUAAAAAAGCGAGUU	............((((((((.......)))))))).....	-3.9	2
SP_2107	2018683	2020200	-	2018648	854	19.0665	35	AAUAAGACAAUAAUCAGGAGACAACUAAACAUGUUAUCAC	UACAAGAAUUUGUACAAAAU	................((.((((........)))).))..	-1.5	3
SP_2108	2020750	2022021	+	2022065	1789	54.3219	44	AUUUGUUCAAGGGGGGUGGAAAUCAAAUCCCCCUUUGAAU	UUAUCAAUAGAGACACAAAU	....((((((((((((............))))))))))))	-18.2	4
SP_2109	2022117	2023424	+	2023429	36	2.57737	5	AAGAAACUACACGCAUUUGAUAUGGAGGACGUCUAAGAUG	AAUAACUCAAUUAAACUCAA	.............(((((...(((.....)))...)))))	-2.5	2
SP_2110	2023426	2024268	+	2024289	2520	72.7334	21	GUGGUGGCGACAAGGGAUAAUUUAUCCCCGCCACCCUUUU	UCAUUUUAUACUCUUCGAAA	..(((((((....((((((...))))))))))))).....	-19.4	4
SP_2111	2024521	2025321	+	2025330	57	4.56	9	CACAUUUCCGUGAUCCAAAUUACCAUAAAUAGGAGAUUUU	UAUGCCCGUUACGAUUAAAG	...(((((((((((....)))))........))))))...	-4.3	4
SP_2112	2025331	2026317	+	2026395	2260	113.298	78	ACUAUCAGGUAUUGAAAAAACUUGAUACUAUGCGUUUUAU	UGUGGGAAGAUUUACUUCCU	..((((((((.........)))))))).............	-6.1	5
F49	2026337	2026403	+	2026405	14	14	2	AUUGAAAAAACUUGAUACUAUGCGUUUUAUUGUGGGAAGA	UUUACUUCCUUUUCUACUGA	..........(((..(((.(((.....))).)))..))).	-0.7	1
SP_2113	2026609	2027550	-	2026475	122	5.66601	134	AAACAGUGUUUUGAGCAACCUGCGGCUAGCUUCCUAGUUU	GCACUUUGAUUUUCAUUGAG	...(((.(((......)))))).((((((....)))))).	-6.3	4
SP_2114	2027528	2029291	-	2027491	397	12.6564	37	UAAGCGGUGGCGCUAUUAUCUGCGCCGCUUUGCUUAUCAG	AUAAAAAUUUUACGUGUCUU	(((((((((((((........))))))))..)))))....	-19.6	3
SP_2115	2029643	2029873	-	2029614	20680	429.089	29	AUUCAAAAUAAAAGAGUCCGGUGAAGUUCAUCGGAUUUUU	GUAUUAUACUCAAUGAAAAU	...........(((((((((((((...)))))))))))))	-14.2	5
SP_2117	2030544	2031218	-	2030531	25	25	13	CCUAUGGUAAAACGUUAUUUCAAAUAAAGGAGUUAUCUAU	GAAAUUACUUAAAAACCUUG	.....(((((....(((((...))))).....)))))...	-1.8	5
SP_2118	2031280	2031477	-	2031276	39	2.78571	4	AAAUCCAAAAAUCUAGCAAGUGAAAAAGGAGAAUGAAUAU	GAAAAAGAAACGUAGAUUGU	...(((.....((........))....)))..........	-1.3	3
SP_RS10815	2031693	2032160	-	2031693	39	2.26087	0	UAUUGAGGAUAUCCAAACCGUUGAAUUUGACGGAGAGUAG	GUGUGUAACAUGCAACUAAA	......((....))...(((((......))))).......	-5.9	1
SP_RS10820	2032160	2032441	-	2032119	12320	273.064	41	GAUAGAUAAAGUGGUCAGGAACCUACUCCUGACCUUUUUC	UUUUGCAAAAUGACAAAAAU	.......((((.((((((((......)))))))).)))).	-14.2	5
SP_2121	2032438	2033727	-	2032422	193	5.85334	16	AAACUAGGAUUUUAUACUCAAUAAAAAUCAAAGAGCAAAC	UAGGAAGCUAGCCGCAGGUU	...((..((((((..........))))))..)).......	-2.4	0
SP_RS10835	2035243	2036093	-	2035162	23540	463.977	81	UGCCCUCUCUCAGGUCAUUACAAAAGUUCUAUCGUUUUUU	UGCUCAUUUUGUUUGUUGCA	((.(((.....))).)).......................	-1.5	6
SP_2124	2036068	2036202	-	2036011	211	5.98757	57	GAAAUAUCUCACUGAGACAAGCAACCGGAGGACAAUUUUC	GCCGUCUAUGUUGUCCCGUU	......((((...)))).......................	-1.6	4
SP_RS10845	2036580	2036834	+	2036896	40	2.34742	62	GAGUUUAUUUUUUACCUGACUUGUCCAUAUUCCAGAAGUC	UGUCACGGCUCCGCGUGAAG	.................(((((.............)))))	-2.3	1
SP_2126	2036860	2038563	-	2036722	1438	15.6903	138	UUUGGGCUGACUUCGUCAGUUCUAUCCACAACCUCAAAAC	AGUGUUUUGAGCUGACUUCG	...((((((((...))))))))..................	-9.1	1
SP_2127	2038796	2039728	-	2038681	235	22.0312	115	AUAUUCUGGUCAUCAGAAAGUGCACUAAUCCGCUUUGUUG	UUUUUAAUUUUAAAUAUUUC	....((((.....))))(((((........))))).....	-5.2	5
SP_2129	2040586	2041932	-	2040545	12	12	41	GGAUGAUUUUAAGUAAAAAUAGAGAAGAUGGGUUAAGAAA	AUUUGCGACUAACAUCCGAU	........................................	0	2
SP_2133	2045465	2045665	+	2045703	2785	76.0609	38	UAACACCUUCUCCUGUCUGCCGUGUCGGAUAGGAGAAUUU	UUUCAUCUUUUUUUGUCAAG	.......((((((((((((......))))))))))))...	-16.9	3
SP_2134	2045817	2045999	+	2046016	5934	25.3651	17	ACUAAAGCUGCAUCAGCUGAAUAAUAGAAGGGAGAUACCA	UGCGCGUAAAUAUUACACUU	.....(((((...)))))...........((......)).	-6.8	1
SP_2135	2046015	2046164	+	2046217	94849	162.222	53	AAUCAAUACAGAAGAAAAACGCUUGAUCAGCGUUUUUUCU	UUUUGUUAAUUUCACUACAU	.............((((((((((.....))))))))))..	-9.6	7
SP_2136	2046656	2048521	-	2046587	903	37.1096	69	AACUAAAAAAUCUUCUUACAUAUGUAGGAAGAUUUUUUGG	AUUCUCAAAACUAGUUUAAA	..(((((((((((((((((....)))))))))))))))))	-19.1	6
SP_2139	2049848	2050210	-	2049833	61	4.65254	15	UGGUUUUGACUAUGAAGAAUGGUAAAAUUGAAAUCAGUCU	GUGUAGGCUUAGUAUUUCAA	(((((((((((((.....))))).....))))))))....	-5.3	3
SP_2141	2050572	2052452	-	2050422	60	60	150	UAUAAAAACAAGAACACCUUGCUUGGCGCAGGGUGUUUCG	CGUGAAACAGAAGAAUUAUC	...........(((((((((((.....)))))))))))..	-16.1	4
SP_2145	2057586	2059670	+	2059710	223	12.3889	40	AUAACCAAAAGAACCUUUGCAUCGCGCAAAGGUUCUUCUU	UUAUGAAACUUGGACUUGAA	........((((((((((((.....))))))))))))...	-17.2	6
Leu_leader	2059676	2059784	-	2059675	107	107	1	CAUAAAAGAAGAACCUUUGCGCGAUGCAAAGGUUCUUUUG	GUUAUUAGUGACUUGGUAAC	......((((((((((((((.....)))))))))))))).	-19.5	6
SP_2146	2059710	2061389	-	2059675	107	107	35	CAUAAAAGAAGAACCUUUGCGCGAUGCAAAGGUUCUUUUG	GUUAUUAGUGACUUGGUAAC	......((((((((((((((.....)))))))))))))).	-19.5	6
SP_2150	2063431	2064447	+	2064518	141	9.72414	71	AUGAGGGCUGCGACUAAUAGCUUUAGUCCGGUCCUCUUUU	AUGUAAUGGUAAUCUAUUAU	..((((((((.((((((.....))))))))))))))....	-20.4	5
SP_2153	2067301	2068632	+	2068725	11	11	93	AAAAGUUAGACAGAAUAAAUCUAACUUUUGGGGUGUUUUA	UUAUGAAAUUGAGUUAUGAA	((((((((((.........))))))))))...........	-7.6	5
SP_RS12520	2069038	2069178	-	2068963	580	29.2744	75	CAGUCAAAUCGAUUUCUAAAAAUGUUUUAGAAGGAGAGGU	GUACUAUUCUAGUUUCAAUA	........((..(((((((((...)))))))))..))...	-6.3	1
SP_RS12525	2069200	2069328	-	2069113	62	3.44444	87	UAAGUUAAAACCUAUUACAAUAAAUUACAACGGAAAAUCA	GAAGUAAUUGAUAGUAAAGA	........................................	0	1
SP_RS10990	2069316	2069567	-	2069224	45	3.28125	92	UGAAGAAGAAGACAAACCGCUAUCUGAUAAAUAUAUUUUU	GAAAAAAUCUUAGGAAAAAC	......(((((........)).)))...............	-0.1	6
SP_2156	2069966	2070865	-	2069939	1391	25.8413	27	UGAGAAGAAAUAAUAGACUAAUACUCUUCGAAAAUCUCUU	CAAACCACGUCAGCGUCGCC	...(((((................)))))...........	-2.7	4
SP_2158	2072292	2074058	-	2072247	79	7.9	45	GUUUAUAUAGGAGGUGAACUUACGUCCCUCCUAUCCUUUU	AAAAAGAUUUGUUAAACAAU	......((((((((.((.......))))))))))......	-11.8	5
SP_2161	2079620	2080420	-	2079577	39	39	43	AAAGUGUGGAGGUGGUAUUUGGGAUAUCACCUCCAUUUUG	GAAGAGAGGUAAAGAGUGAA	.....((((((((((((((...))))))))))))))....	-19.6	4
SP_RS12535	2085698	2085793	+	2085828	34	2.61538	35	AGCUGACAUGAUGUGAAGAGAUUUUCGAAGAGUAUCGUUC	UGUCUGCUGACUGAUUUACA	.......(((((((((((....))))).....))))))..	-2.6	4
F50	2085887	2085994	+	2085995	1153	1153	1	AGUAUCAAGUUUUUGCACACCUGAUAUUAUGCGUUUUUCU	GAUUUUAAAGAUUUUUCUCU	(((((((.((........)).)))))))............	-4.7	6
SpF66_sRNA	2086087	2086325	+	2086325	322	32.2	0	CCCUUAACUACGGCCAUAGUUAGGGGCUUUGGUGUUCUAA	UGAACCUUAUCAAUUAACUA	((((((((((......))))))))))..............	-12.2	4
RsaJ	2086281	2086411	-	2086278	21	21	3	ACCAAAGCCCCUAACUAUGGCCGUAGUUAAGGGCUUUUUU	GACGUAUCUUAGCGAUUUAA	...(((((((.(((((((....))))))).)))))))...	-16.7	6
SpF66_sRNA	2086430	2086668	+	2086668	74	4.35294	0	CCCUUAACUAUGGCACUAGUUAGGGGCUUUGGUGUUCUAA	UGAACCUUAUACACUAACUA	((((((((((......))))))))))..............	-12.4	4
RsaJ	2086624	2086730	-	2086621	10	10	3	ACCAAAGCCCCUAACUAGUGCCAUAGUUAAGGGCUUUUUU	GACGUAUCUUAGCGAUUUAA	...(((((((.((((((......)))))).)))))))...	-16.4	6
SP_2169	2086817	2088322	-	2086777	5310	161.285	40	UGAGAAAUCGACUAGUUCAUAAGAGCUAGUCGGUUUUUUG	AUACUAGAUGGCUAACUUCA	.(((((((((((((((((....))))))))))))))))).	-22.1	6
SP_2170	2088332	2089138	-	2088271	49	2.92281	61	AGCUUAUUACUAGCCAGUCUAUGUGCCUUGUUUUUAGUGG	CUUGUUCCAAUCAAAAACAG	....(((((..(((.((.(.....).)).)))..))))).	-3	4
SP_2173	2090430	2091698	-	2090365	9369	210.97	65	AAUGAAACUAGUUUUCACGUUUUUUCUUGACUCUUUUUUU	GCUUGUGAUAUAAUUAACUG	..(((((.....))))).......................	-0.9	7
SP_2174	2091691	2091930	-	2091637	229	8.21327	54	UCUUCGGACCGGUCUUGAUCGCUGGUUUGUUGGUUUUUCU	GCUCAUUUUCUUUUAUCCUA	((..(((((((((.......)))))))))..)).......	-11	6
SP_2175	2091944	2093188	-	2091893	78	3.48336	51	AUAUGGAUAUCAAAUCAGAAGUUAUUGAAAUUAUUGAUGA	GUUGUUUAUGGAAGAUGUUU	.............(((((.((((.....)))).)))))..	-2.6	3
SP_2176	2093185	2094735	-	2093137	157	5.25192	48	UUUCAACAGCUUCCUCAUUUAGAGCCAUAUGGCAAUCCUC	AGUAUUUUGUUUAUGUGAUU	.......................(((....))).......	-4.1	2
SP_2177	2094756	2094887	-	2094628	157	7.70294	128	UCCUGUCUAUAAUGUUUUGGGGCAGGAACACACUUAUGGC	GAUUUAAAGGCUGAUUCGGA	((((((((.(((....))))))))))).............	-10.5	3
SP_2178	2095201	2095473	-	2095121	47	47	80	AGUAUCAGGUGUUGAAAAAACUUGAUAUUGUGUGUUUUAU	UAUGGGAAGAUUUACUUCAU	((((((((((.........))))))))))...........	-9.1	6
SP_RS11120	2097239	2098087	-	2097179	110	11	60	CCAGAAUCCUUGCCUUAGCUUAGAUCCUGGAUGGUUUCUU	UUUUCACCCAAUGGGUGUUU	((((.(((...((....))...))).))))..........	-8.3	5
group-II-D1D4-1	2100000	2100079	-	2099955	41	3.11392	45	ACUCAAACAGUCUGGGGAGAGACUGUUUGAGGUCUGUCGC	UAGAAAGAGAAAACGACAGA	.((((((((((((......)))))))))))).........	-19.2	3
SP_RS11140	2100520	2100717	-	2100446	48	48	74	UUUAUAUUAGCAAAACGACGAUUUAAAUCGUCGUUUUUUU	GUAGUACGACGGGCAUGUCG	...........(((((((((((....)))))))))))...	-12.5	7
SP_2183	2101545	2101748	-	2101459	36	2.66667	86	AAUAUAAACCCUGCCUUUAUAUCUAGGCAGGGUUUAUAUU	UUAGAAAUUCACGUAGGUUG	((((((((((((((((........))))))))))))))))	-24.2	6
SP_2184	2102045	2102749	-	2101930	32	32	115	UUCCUAGUUUGCUCUUUGAUUUUCAUUGAGUAUUAGAAAA	CAAUUAUGUUGAUAGAGCUU	...(((((..((((..(((...)))..)))))))))....	-8.6	2
SP_2185	2102819	2104645	-	2102762	187	10.2466	57	GGAGGGCAGCAUUCCUUGUCGCCCGUCCCUUCUUUUUAAU	GGAGACAGAAAGAUGAUGAA	(((((((.(((.....))).)))).)))............	-13.6	6
SP_2186	2104687	2106195	-	2104644	37	3.08333	43	UGGCAGAAUAAAGCGAUUUAUUUAGAAAGUGUGUAAAUAU	GGAAUUUUCAAAGAAAACAC	.....(((((((....))))))).................	-2.5	3
SP_2187	2106354	2107781	-	2106325	1468	62.0282	29	UAUUCACUUAAAAGGCUUGGUUAAUCCAGGUCUUUUUUGU	GAAAUUCACACAAUCUCCUC	.....((..(((((((((((.....)))))))))))..))	-14.5	7
SP_2188	2107946	2108818	+	2108835	1283	49.8252	17	GAACUCAUUCGUGACAAAUCUUAAUACACCUUUUAUGAUU	GGCAAUAUUGAGAUUCCCAA	................((((.(((........))).))))	-1.3	5
SP_2189	2108775	2109785	+	2109903	4654	137.208	118	UCUAGCGCUAUAAAUCCGGCUAGAGAUUACAGAGUUAUUU	UUUAAUCUAAACUUCCUACA	((((((............))))))................	-7.3	5
SP_2190	2110015	2112096	-	2110003	36	2.75862	12	CAAUGCCAAUGGUGAAUGGGUAAACUAAACCUAAUAUAAC	UAGUUAAUACUGACUUCCUG	....(((...)))...(((((.......))))).......	-4.1	2
SP_2191	2112175	2112702	-	2112136	30	2.05714	39	AAUACAAAAUUCGAUUUAUAUACAGUUCAUAUUGAAGUGA	UAUAGUAAGGUUAAAGAAAA	......................((.((((...)))).)).	-3.4	2
SP_2192	2112785	2114116	-	2112650	50	3.8674	135	UUAUUUUAGUAACAUUCUUUAUUCGAUUGAUUUUUUUAAA	GCGUUCGAUAGAGAAUGAGA	........................................	0	5
SP_2193	2114113	2114766	-	2114022	51	3.44172	91	UAGGUGGUGUUGGUCUAGUCAUUCAUAUAGCUAUUUAUUU	GACCUUUCCUUUUUAUUAUA	((((((((..(((.........)))....))))))))...	-4.7	6
SP_RS12550	2114912	2115035	-	2114841	53	2.71463	71	AGUAGCGGAUAAAUGAAAUCCAUUCCAUUAUCAUAGAUGA	UAGGCUGGUAGGAAAUUUUC	......((((.......))))....((((......)))).	-3.9	2
SP_2194	2115408	2117840	-	2115317	160	6.39692	91	AUGAAAAUCAAAGAGCAAACUAGGCAGCUAGCCGCAGGUU	GCUCAAAACACUGGUUUGAG	.................((((.(((.....)))...))))	-4.5	2
SP_2195	2117842	2118300	-	2117787	181	7.88328	55	AGCAUUGAAUGAAUGUAUCGAAAGUGCCUACAUGGUUGCU	GGACAUUUUGGAGCUCGUUA	.(((((.....)))))......((((((.....)).))))	-5.4	4
SP_2196	2118419	2119147	-	2118371	3164	149.029	48	GGAGUUGGUGAAGAUUAUCCUUUACCAGCGCCCUUUUUCU	UUUAAAAAUGAGAAAAUUUC	((.((((((((((......)))))))))).))........	-16.3	6
SP_2197	2119147	2120154	-	2119115	41	2.38769	32	UGAAAUAAUGACAGAAAUUAGACUAGAGCACGUCAGUUAU	GCCUAUGGUCAGGAGAGGAU	....................((((.((.....))))))..	-2.2	4
SP_2198	2120193	2120954	-	2120153	217	16.6923	40	AAUUAGAAUGUUUCUGAAAAAGAAAAGAGGAAAUCAAAAU	GAAGAAAACAUGGAAAGUGU	..........(((((.....)))))...............	-2.4	2
SP_2199	2120914	2121204	-	2120837	63	2.98107	77	UUAGCAGGUUUUCUUAAACUUCUCCCCAAGUUUAUCCUGC	CGACACCUCUUGAAAUUCUC	...(((((......(((((((......))))))).)))))	-8.3	3
TPP	2121275	2121377	-	2121241	83	2.075	34	UCUAAUUUUGCACCUUUUCCAUGUAUGGUAAAGGUUUUUC	UUUUUUUAAAAAGGAAAACG	...........((((((.(((....))).)))))).....	-8.2	5
SP_2201	2121460	2122806	-	2121424	285	285	36	AUAGAAAAUUGGAGUAGGAGAAAUUUCCUGCUCUUUUCUG	UAAGCAGUUUCCUUGACAUU	.((((((...((((((((((....))))))))))))))))	-16.3	5
SP_2202	2122895	2123161	-	2122869	12557	110.663	26	AUUAUCUUGACUAAAGUGAGAAAUUUUCUCACUUUUUCUU	UUUUCUCCGAAUAAUUUAGG	........((..((((((((((...)))))))))).))..	-10.7	7
SP_2203	2123163	2124515	-	2123160	506	16.7142	3	CAAUAAAUUUUCAAGUAUCUCAAAGAGGGAGGCAUAAGAU	GUCAGAUGCAUUUACAGAUG	..............((.((((.....)))).)).......	-3.9	2
SP_2204	2124559	2125011	-	2124555	190	4.97575	4	ACAAGUGUAAUCAAUCUUCGUGUGAAAGAAGGAUAAGUUU	ACACCUUCUUGACAAGAUUG	...............((((........)))).........	-3.7	4
SP_2205	2125008	2126981	-	2124937	415	9.68503	71	AGGUAAAAAAGGCGAAAUUAAGGAAGUACCAACAGGGUAU	GCGCAAAACUUUCUUAUCAA	.........................(((((.....)))))	-3.7	2
SP_2206	2127117	2127665	-	2127066	21405	137.829	51	GUAAAGGUAGGUUUACUGAAUUGUAAACUACCUUUUUCUU	AUAAUUGAUAGAAUUACUGA	..((((((((.(((((......))))))))))))).....	-13.2	7
SP_2209	2129758	2130393	+	2130505	36	2.46575	112	CAAAAUAUACUAGAAAAUGAAGCAAUUCAAACGAAACCUG	AUAUCGUUUUCCUUCACACC	.................((((....))))...........	-1.3	1
SP_2210	2130642	2131562	+	2131638	2205	68.7868	76	ACUAGAGAACUCACGGAUAGUUCCUAAUCUGGAGAUUUCU	UAUUUGCACUUUUCUUGUAC	...(((((.(((.(((((........)))))))).)))))	-10.9	4
SP_RS12560	2131637	2131780	-	2131584	12	12	53	UAGGAACUAUCCGUGAGUUCUCUAGUCUGGAGAUUUUUCA	AUAGACUUCGUUAUUGGACG	..(((....)))(.(((.((((((...)))))).))).).	-7.4	5
SP_RS11300	2132576	2132899	-	2132440	116	116	136	AGAAAGUCGUGAUUUCUAUUGAAAUGAGGACUUUCUUUUU	AUACUCAUCUGUUUUCAAAA	((((((((.(.(((((....))))).).))))))))....	-16.5	7
SpF51_sRNA	2133001	2133045	+	2133045	11072	134.09	0	UAGUCUCCUAAAUGCACUUAGCCCUUAUUAUAGGGCUUUU	UGUUUUAAUUAUUCUAAUCG	...................((((((......))))))...	-9.7	4
SP_2214	2133145	2134185	-	2133112	28448	180.084	33	UAACUAAUAAUAGAAAGGAAGCAAAUUGCUUCCUUUUUUG	UAUAGGGCUUAGAUUUUUCC	...........((((((((((((...))))))))))))..	-14.1	6
SP_2215	2134264	2135043	-	2134207	43568	344.475	57	UACCUAGGAGGGCGGGGCUUAGCCCGGCUCUCCUAUUUUC	AAAAAAUAUAGGAGAAUUAA	....(((((((((.((((...)))).))))))))).....	-24.5	5
SP_2216	2135267	2136445	-	2135233	50648	255.491	34	GAUUAAUUUACAGAGGGACUCGAAUAGAGCCCUCUUUUCA	GGUUUUACCGUGACAAUCCC	...........((((((.(((.....))))))))).....	-14	5
SP_2217	2136539	2137033	-	2136490	3304	181.187	49	AUAAAUGUAACAAAGGCGUAAUAUUUAUUAGGCCUUUUUU	UGGUAUACUAGUAUUGUCUU	...........((((((.((((....)))).))))))...	-10.1	6
SP_2218	2137033	2137851	-	2136954	76	3.18325	79	CUUUCUUUGUUCUAAUUGACGCCCAUAUUAGCCAGCUUCU	GGGCUCAUUUUUCCCCCAUG	........((((((((((.....)).)))))..)))....	-1.4	3
SP_2219	2137910	2138704	-	2137823	36	2.36293	87	AAGGUAGGGAUAUGAACCGUUUUAAAAAAUCAAAAUAUGU	CAUUAUUGUUUUUGUCACUG	......((........))......................	-1.7	3
SP_2220	2138697	2139536	-	2138616	49	2.90464	81	ACCGAUUGGAUCCACGUAGCAAAUUGCUUGCUAUGAUGCU	ACUGAUUUUGAUUGUGUUUU	.((....))...((((((((((.....)))))))).))..	-8.9	3
SP_2221	2139521	2140348	-	2139467	73	3.44403	54	ACAUAUCAAGAAGGUACUCCCUUAGCUUCAGCAGCUUUGU	CGGAUGUUUCUUUGACGAUU	.........((((.((......)).))))...........	-4.4	4
SP_2223	2140901	2141731	-	2140844	145	8.35009	57	AAGAACAAAUUCCCAAUCUCUUAACAAUAGGUCGAAUUCU	CUUUAUACCUAUUUUUAUCU	.......(((((...((((.........)))).)))))..	-1.1	3
SP_2224	2141764	2143047	-	2141721	256	11.1772	43	CCUAUUAUAAUAGACACUAGAAAGAAGGGAUGACAAGUAU	GAGAAAAAAAACAAUUGGAG	(((.((....(((...)))....)).)))...........	-1.2	2
SP_2225	2143044	2144294	-	2143030	45	2.7791	14	UUUACUUUAUGGAAGGAAUAGAAUGACAAAGGUUGUUUUU	GAAGAAAAAUACUAUCCAGC	...................((((((((....)))))))).	-3.2	7
SP_2226	2144453	2144821	+	2144879	65	4.3246	58	CUAUCUCUCAAGACUUUUCGUAAUUACAAAGAAACGAAAA	UAGACUUUAAUCCUAAAUUG	...............((((((............)))))).	-3.1	0
SP_2227	2144824	2145921	+	2145963	209	6.96667	42	AACAUUGUAAAAGAACUCCUGUUUUCACUGGAGUUCUUUU	CAUUGUUUUUUACAUAGAAU	........(((((((((((.((....)).)))))))))))	-14.1	6
SP_2228	2145972	2147450	-	2145927	1757	16.1935	45	AAUGAAAAGAACUCCAGUGAAAACAGGAGUUCUUUUACAA	UGUUGUCAAUUUCCAUUUAC	..(((((((((((((.((....)).))))))))))).)).	-16.3	4
SP_2229	2147602	2148627	-	2147549	3989	88.3989	53	GAAACUAUCUUUUCUAUCUCGAAGAAAAGAUAGUUUUUUA	UUUACCCCUGUAACAUUUGA	(((((((((((((((.......)))))))))))))))...	-15.6	6
SP_2230	2148833	2150455	+	2150499	1446	27.2585	44	AAACUUCAAAACUCAGUUGGGUUAACCAACUGAGUUUUCU	AUCAUUCUACGAGGUAACAU	.......(((((((((((((.....)))))))))))))..	-19	5
SP_2231	2150517	2153069	+	2153100	637	14.3146	31	UAAGGCAUAAAAAAUCGACCAGUUAAUCGGUCGAUUUUUU	UAAUCUUCUUCCAUUUUCUU	........((((((((((((........))))))))))))	-14	6
SP_RS11395	2153170	2153484	-	2153068	28	28	102	GAAGAUUAAAAAAAUCGACCGAUUAACUGGUCGAUUUUUU	AUGCCUUAGAUGACUUUCGU	........(((((((((((((......)))))))))))))	-14.6	6
SP_2234	2154880	2155422	+	2155458	364	25.6338	36	AUUGAUACAAAAAGAGGAACACAGCUGUGUUCCCUUUUAU	CUAUACUCCGCCAGUAGGAC	.........(((((.(((((((....))))))))))))..	-13.8	5
SP_2297	2155463	2155536	-	2155425	144	7.85455	38	AGUAUAGAUAAAAGGGAACACAGCUGUGUUCCUCUUUUUG	UAUCAAUUUGUAUCACCAAG	.........((((((((((((....))))))).)))))..	-13.3	6
SP_2298	2155542	2155613	-	2155425	144	8.22857	117	AGUAUAGAUAAAAGGGAACACAGCUGUGUUCCUCUUUUUG	UAUCAAUUUGUAUCACCAAG	.........((((((((((((....))))))).)))))..	-13.3	6
SP_2235	2155665	2156417	-	2155540	27	2.7	125	UCACGGCGGUAACACGGGUUCGAAUCCCGUACGGACUAUU	UUAUCCGCCAUAGCUCAGUU	....(((.((...(((((.......))))))).).))...	-8.2	3
SP_2236	2156414	2157739	-	2156300	90	7.82609	114	UCGAAUAUUCCAAUAUCAUACAAGACAACGGGAAAAGUCC	GUGAAUUUGAAGAAUACAUU	..((...((((....((......)).....))))...)).	-3.1	1
SP_2299	2158050	2158123	-	2158013	363	15.1671	37	UCAAUAUAAUAGCAAAGCUGGGAAUUUUCCCGGCUUUUUU	CUUAAAAAAGUACACUUUGG	.............((((((((((....))))))))))...	-14.8	6
SP_2238	2158167	2158646	-	2158023	51	2.22545	144	CCUGCUGGGAUCAAUAUAAUAGCAAAGCUGGGAAUUUUCC	CGGCUUUUUUCUUAAAAAAG	((.(((..(.............)..))).)).........	-4.2	4
SP_2239	2158817	2160010	+	2160069	1091	6.98628	59	AAGCUUUACAUAAGAGAAAAGAUGUGUUAGUGUAGAAUCA	UGGAAAAAUUUGAAAUGAUU	....(((((((((.(.(.....).).)).)))))))....	-3.5	2
SP_2240	2160068	2160826	+	2160838	41811	54.4591	12	AUAGUAGAAUUAUCAACAGCCUGAAAUAAGGCUGUUCUUU	UAUUU	..............((((((((......))))))))....	-12.3	6
